# Supplementary material for: Whole-exon sequencing of human myeloma cell lines shows mutations related to myeloma patients at relapse with major hits in the DNA regulation and repair pathways
Source: Springer Nature journal article supplement (doi:10.1186/s13045-018-0679-0), 2018-12-01

# IFNAR2: [Somatic Mutation Rate: 6.06%]

NM\_207585

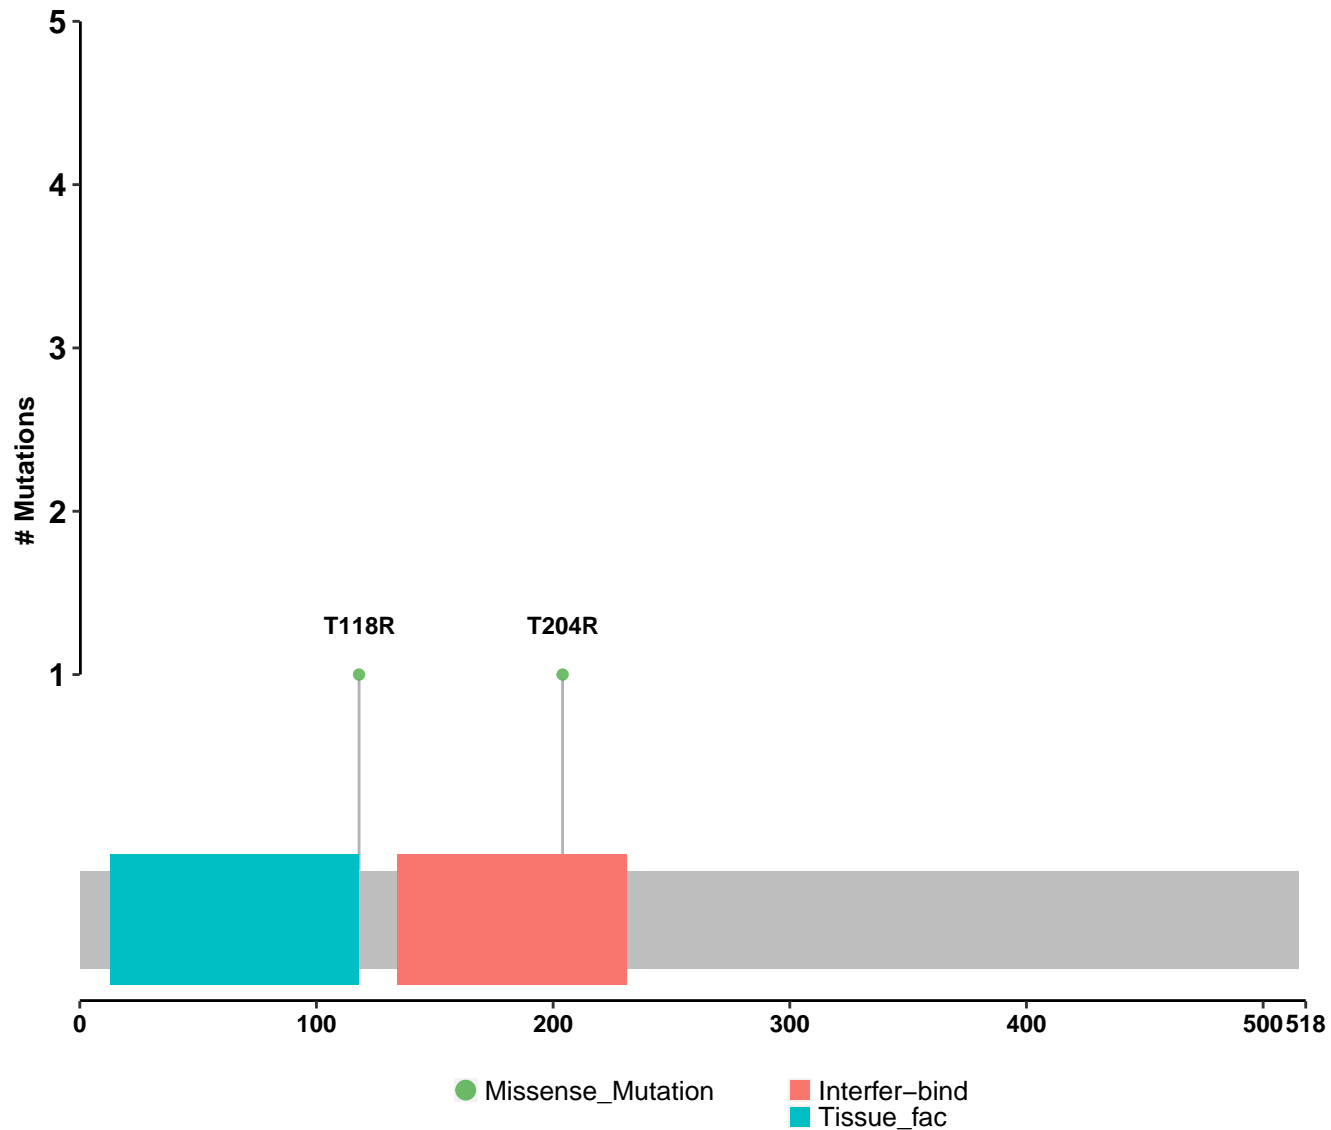

# KDM2B: [Somatic Mutation Rate: 6.06%]

NM\_032590

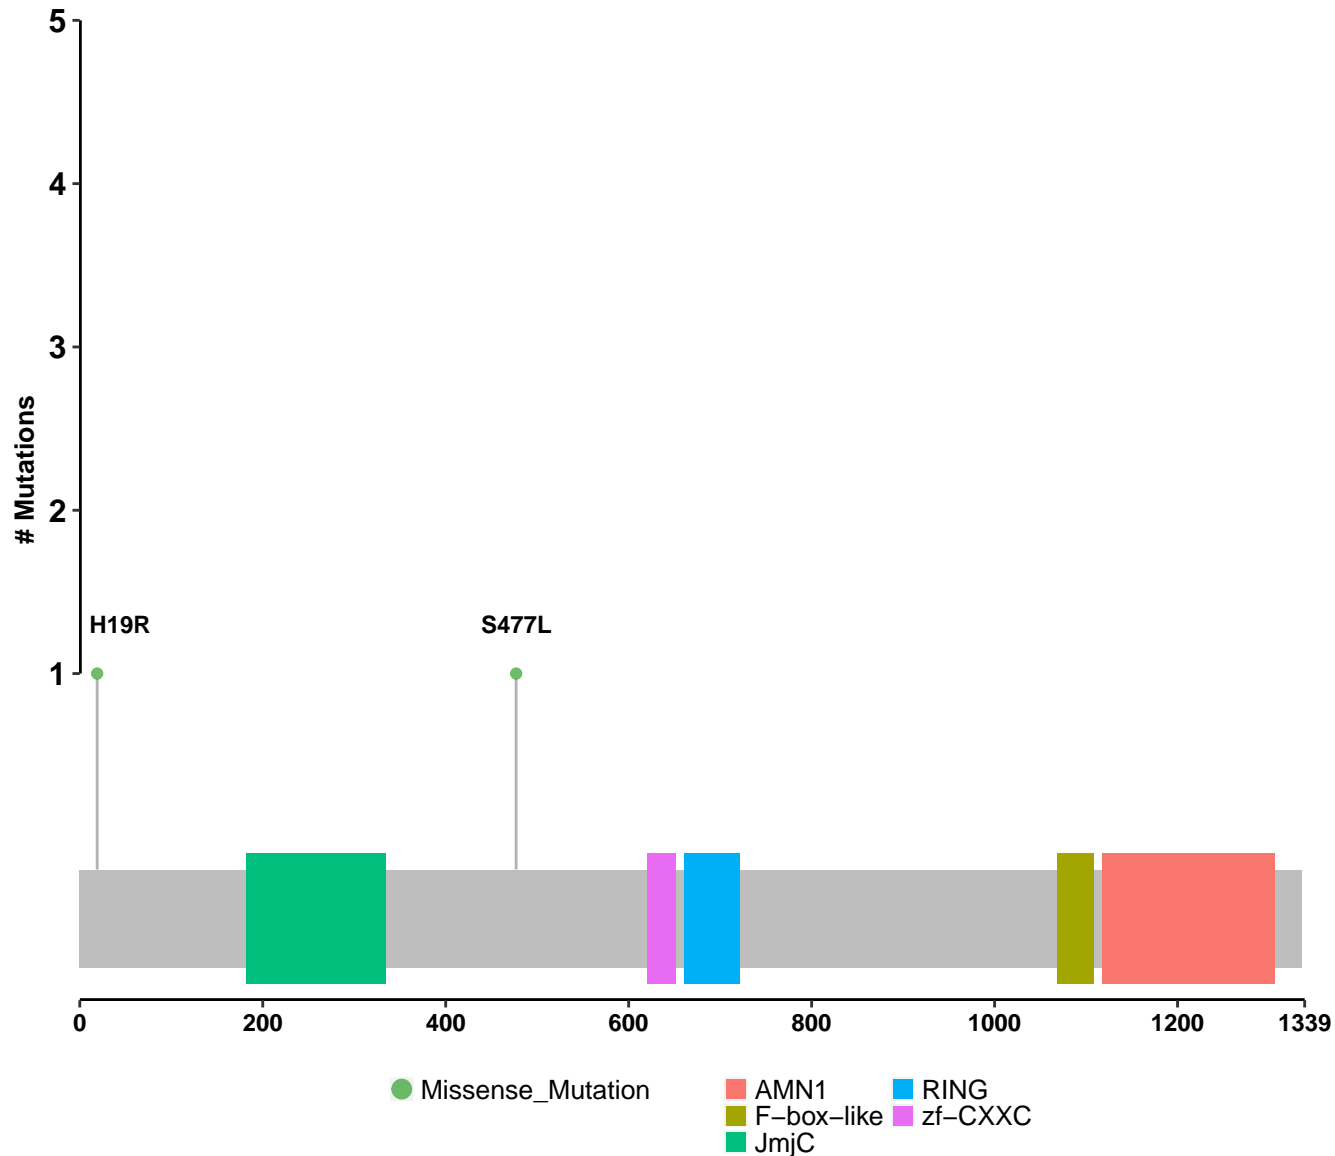

# MAP3K1: [Somatic Mutation Rate: 3.03%]

NM\_005921

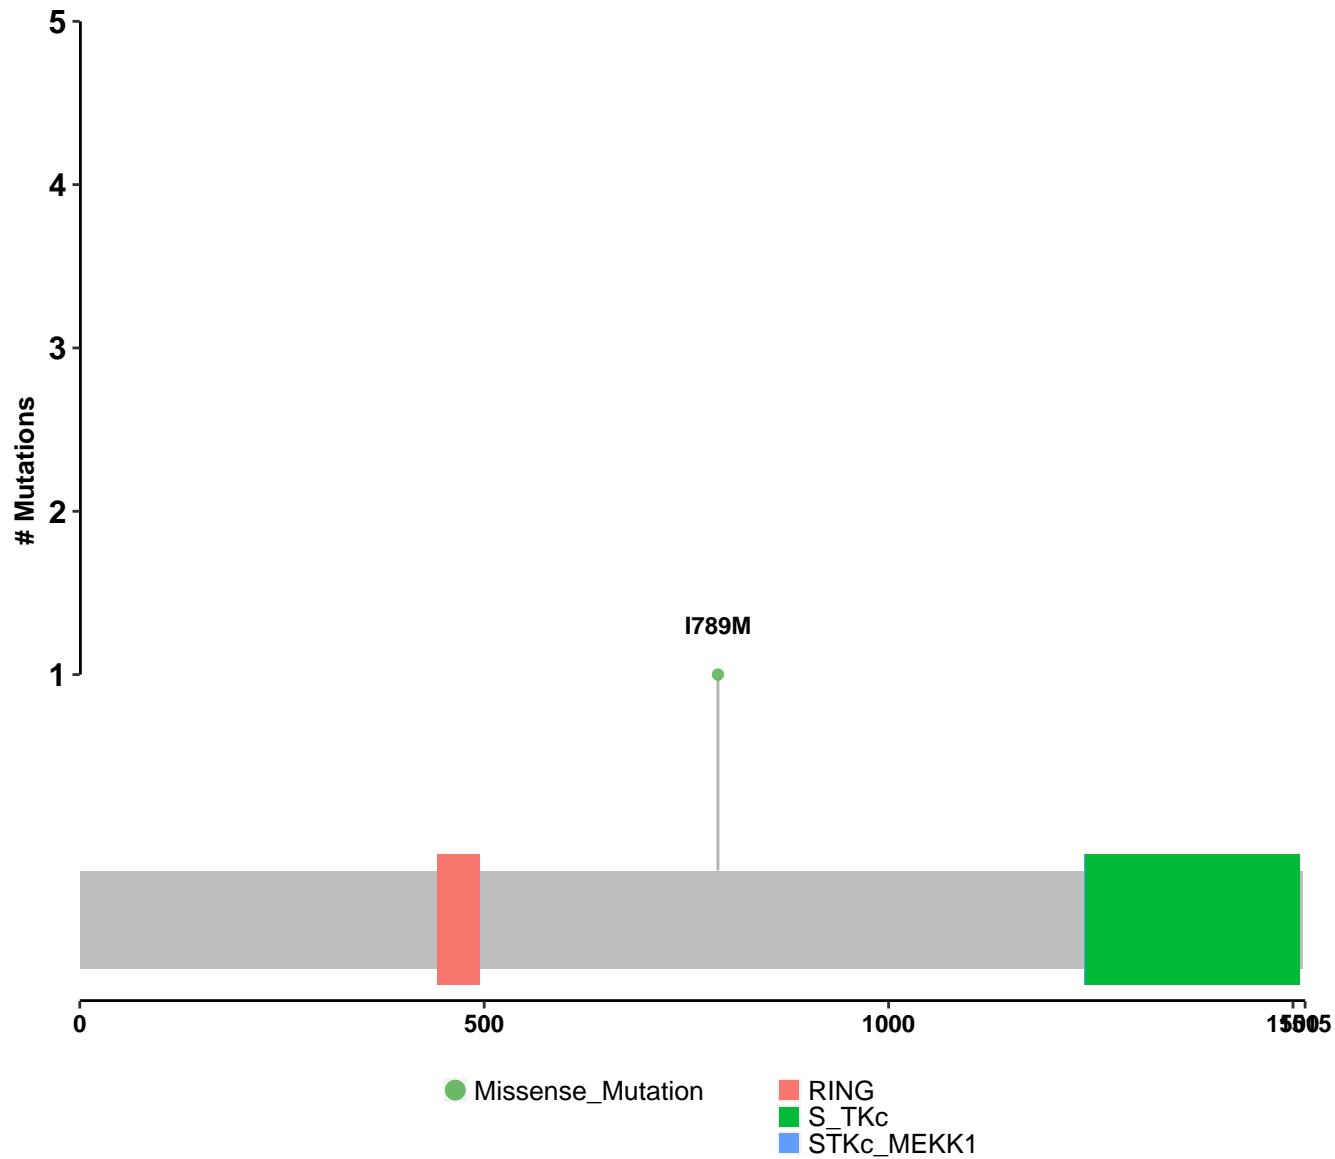

# MB21D1: [Somatic Mutation Rate: 6.06%]

NM\_138441

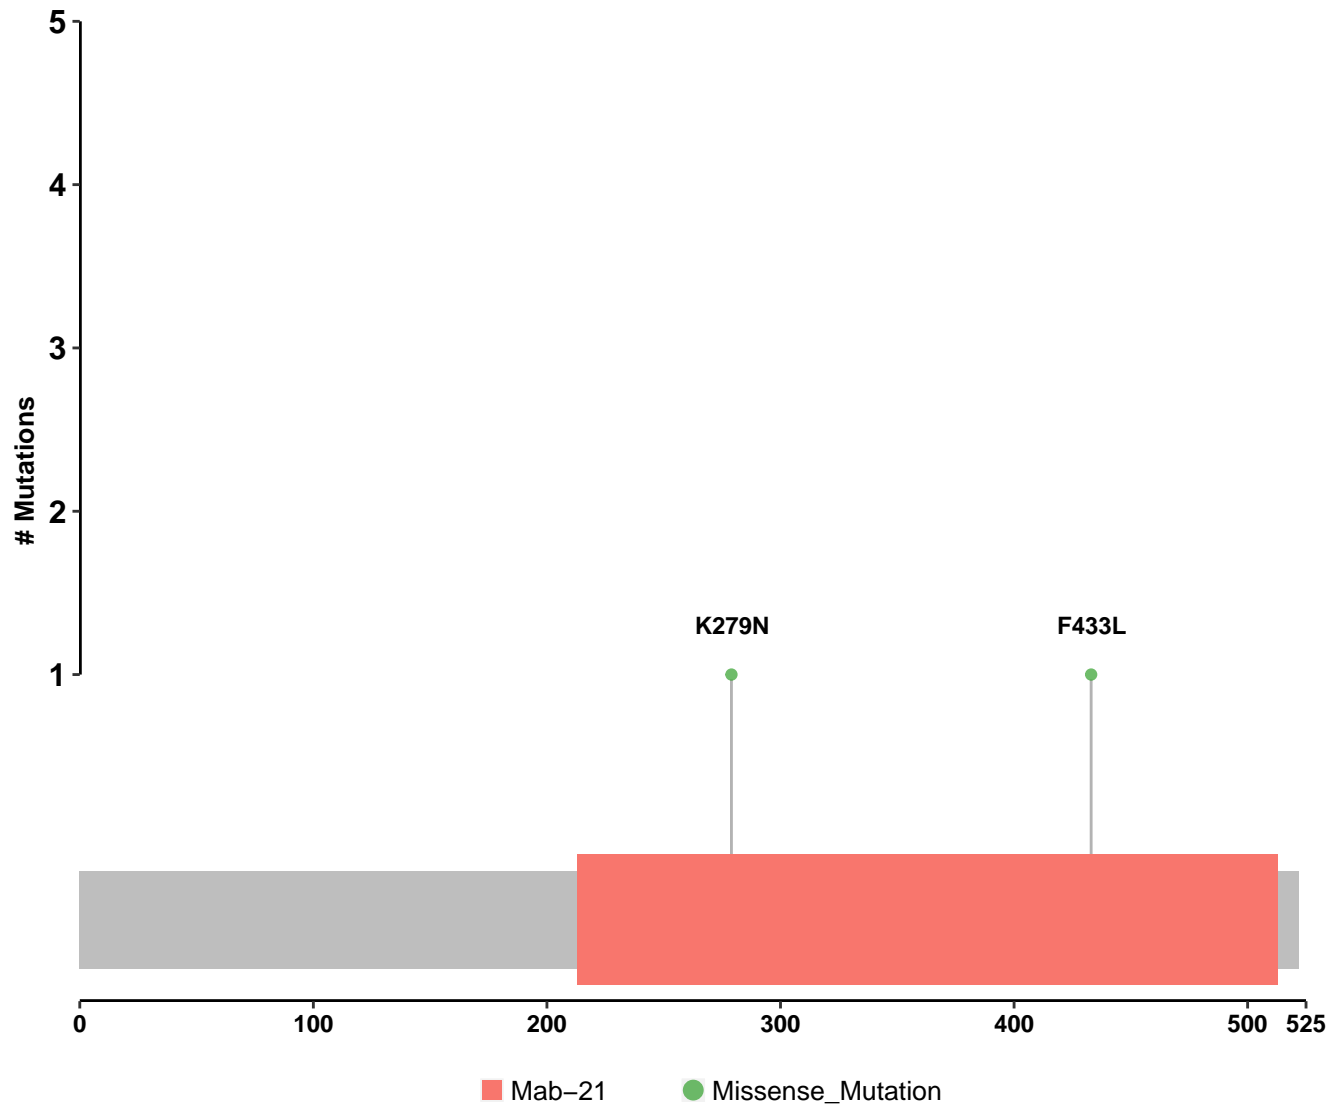

# SETD2: [Somatic Mutation Rate: 3.03%]

NM\_014159

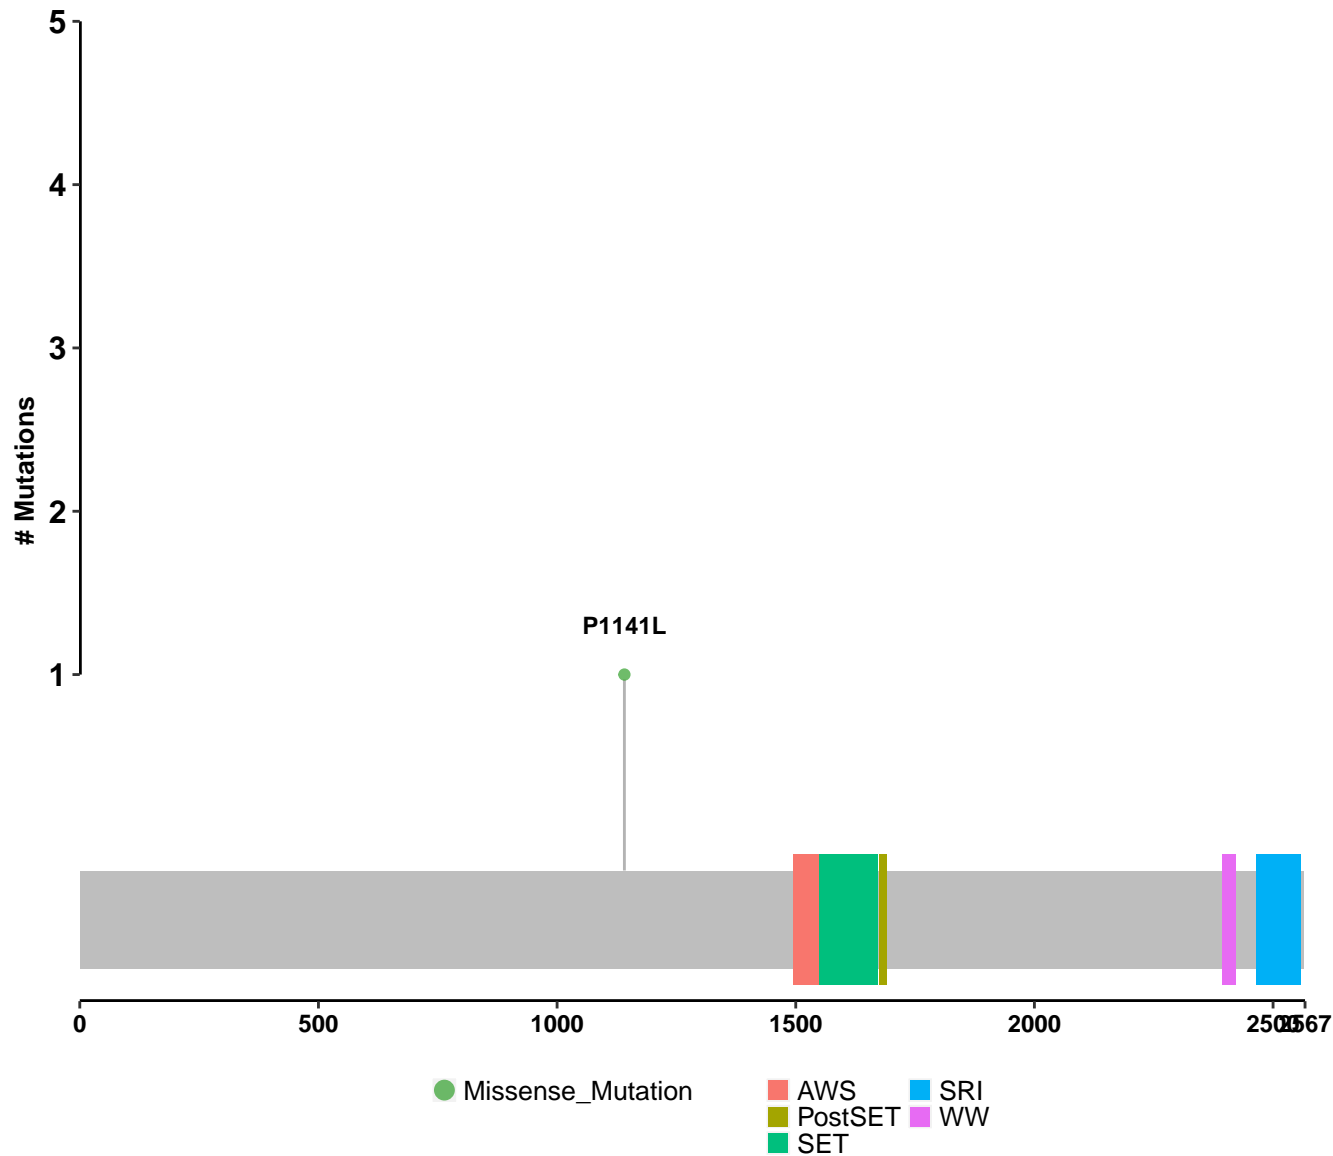

# STAT2: [Somatic Mutation Rate: 6.06%]

NM\_005419

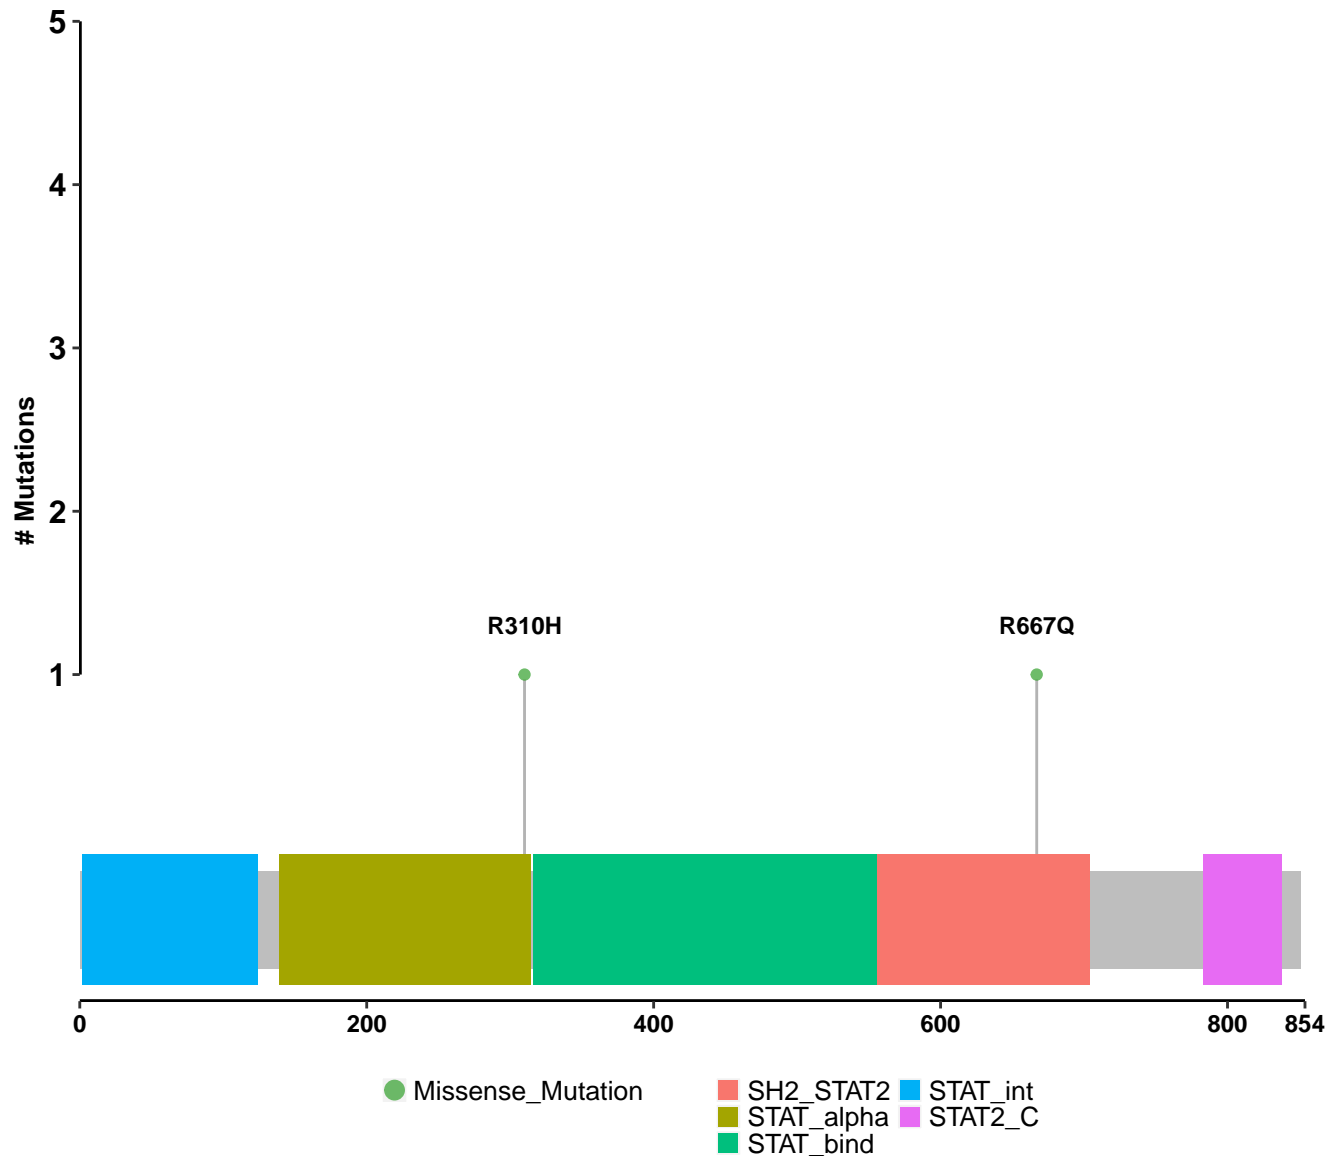

DAK: [Somatic Mutation Rate: 3.03%]

NM\_015533

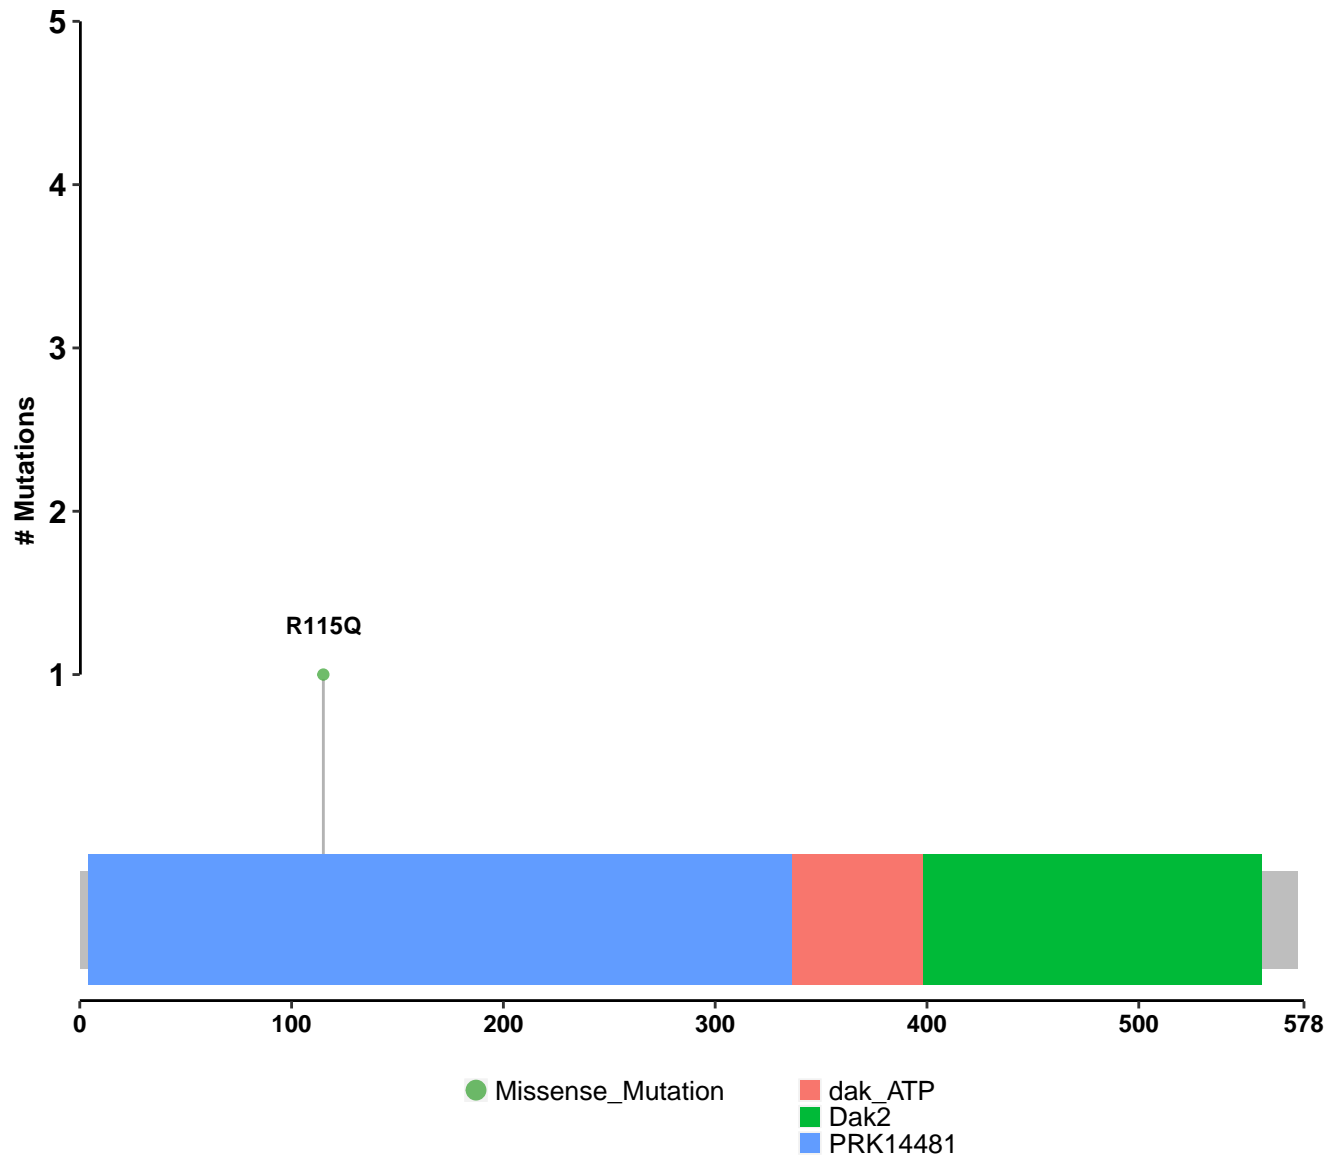

# DDX3X: [Somatic Mutation Rate: 3.03%]

NM\_001356

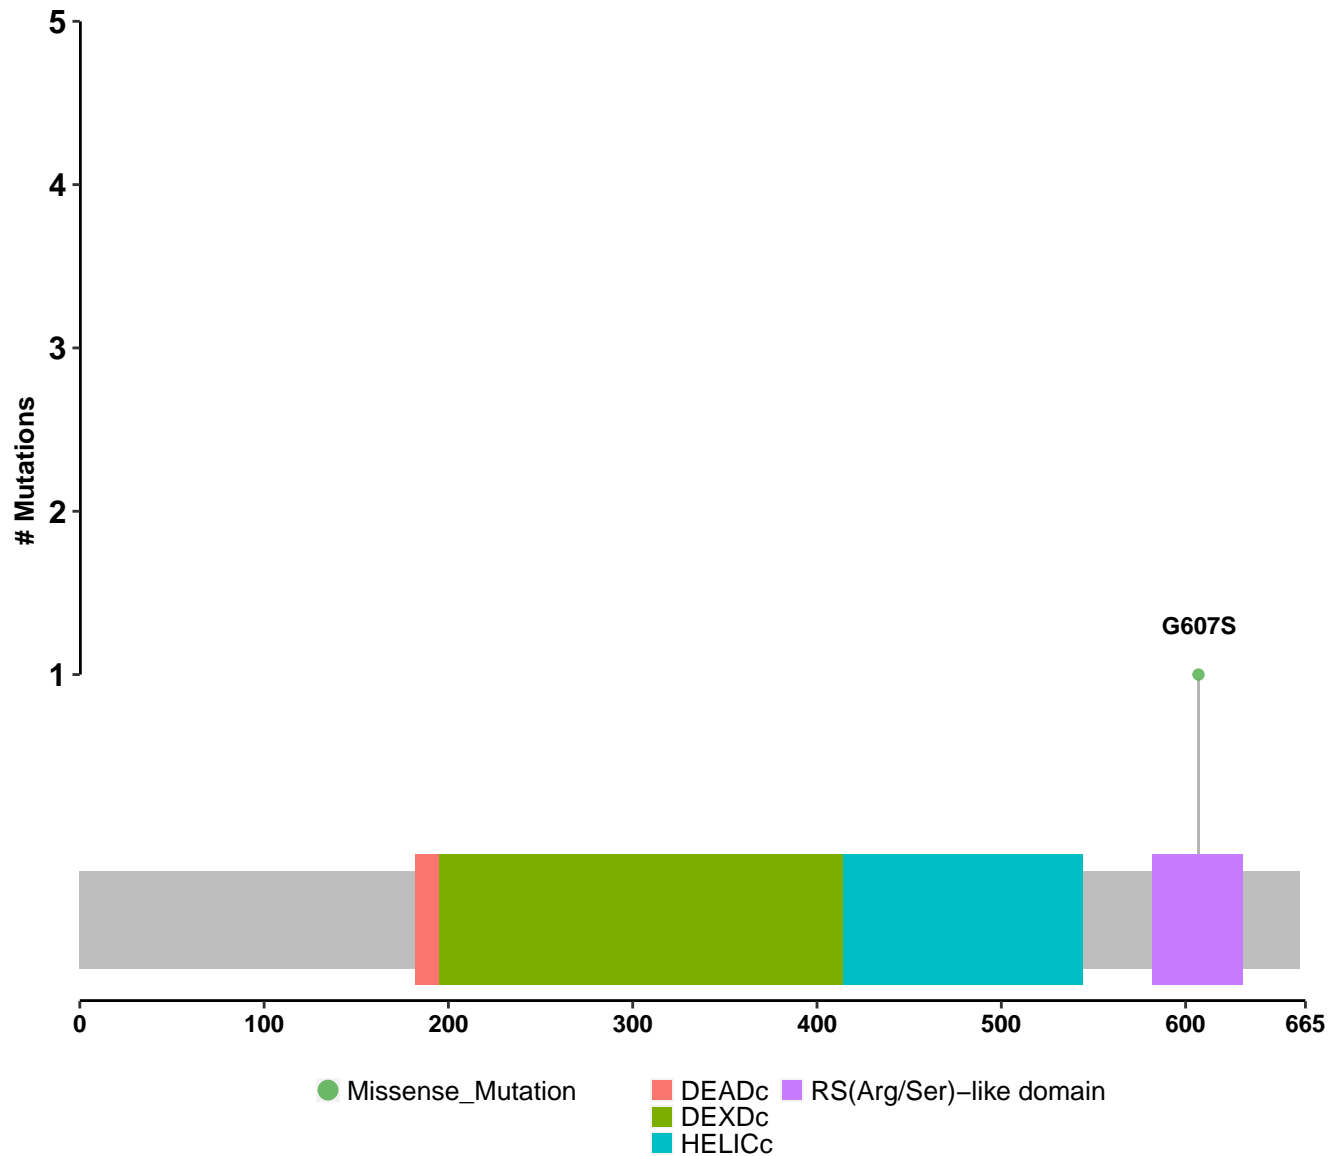



# HIST1H2AM: [Somatic Mutation Rate: 3.03%]

NM\_003514

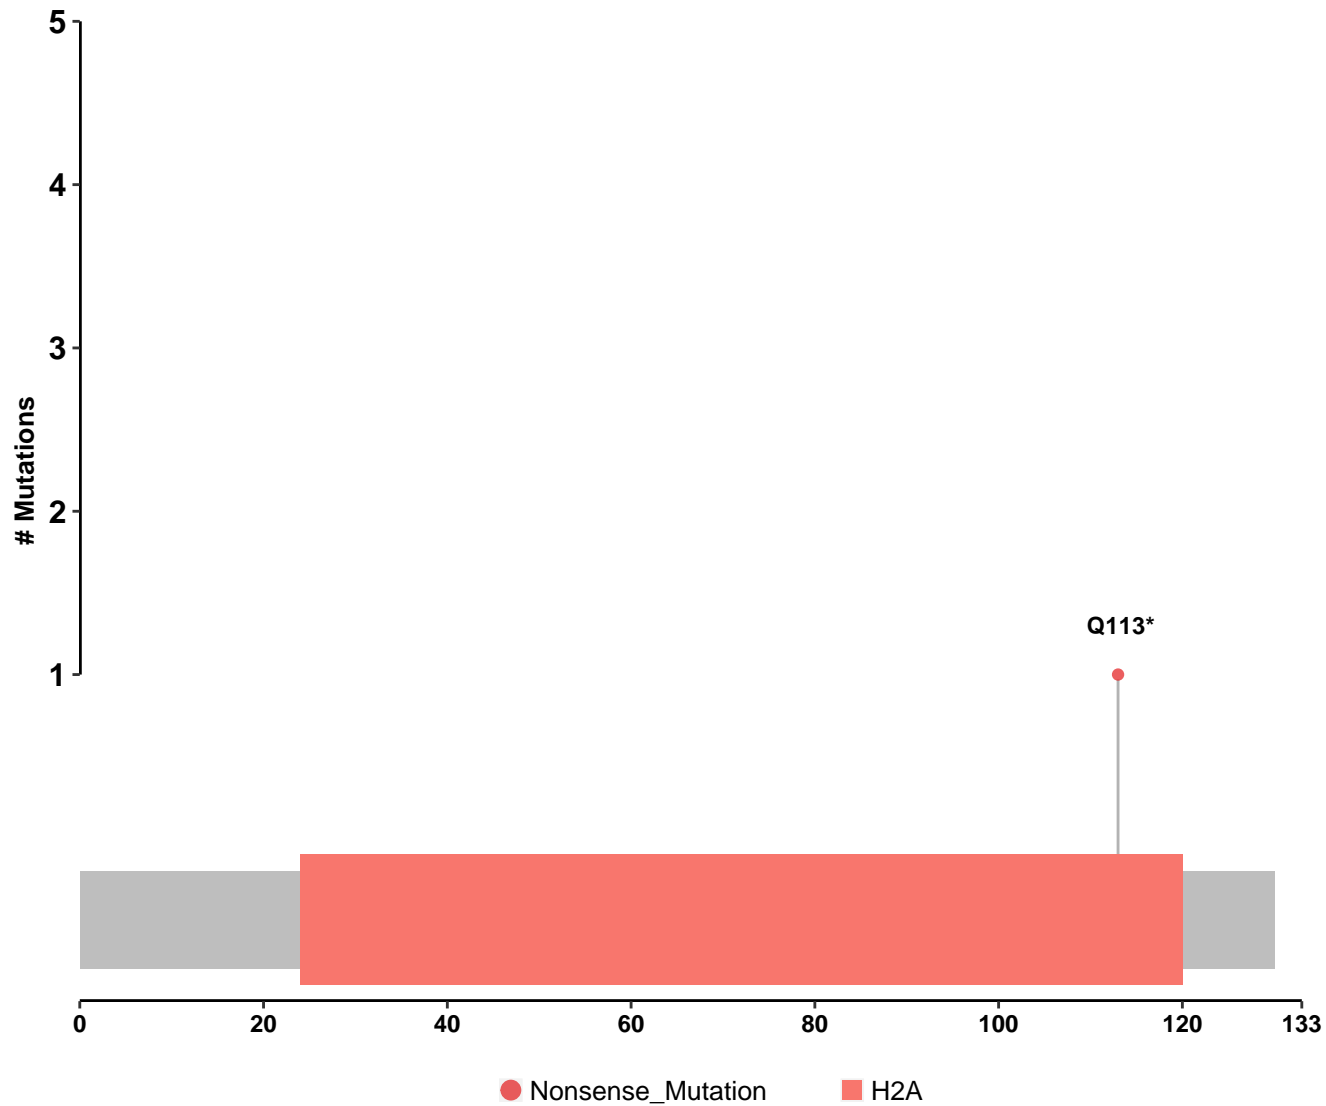

# HIST1H2BK: [Somatic Mutation Rate: 3.03%]

NM\_080593

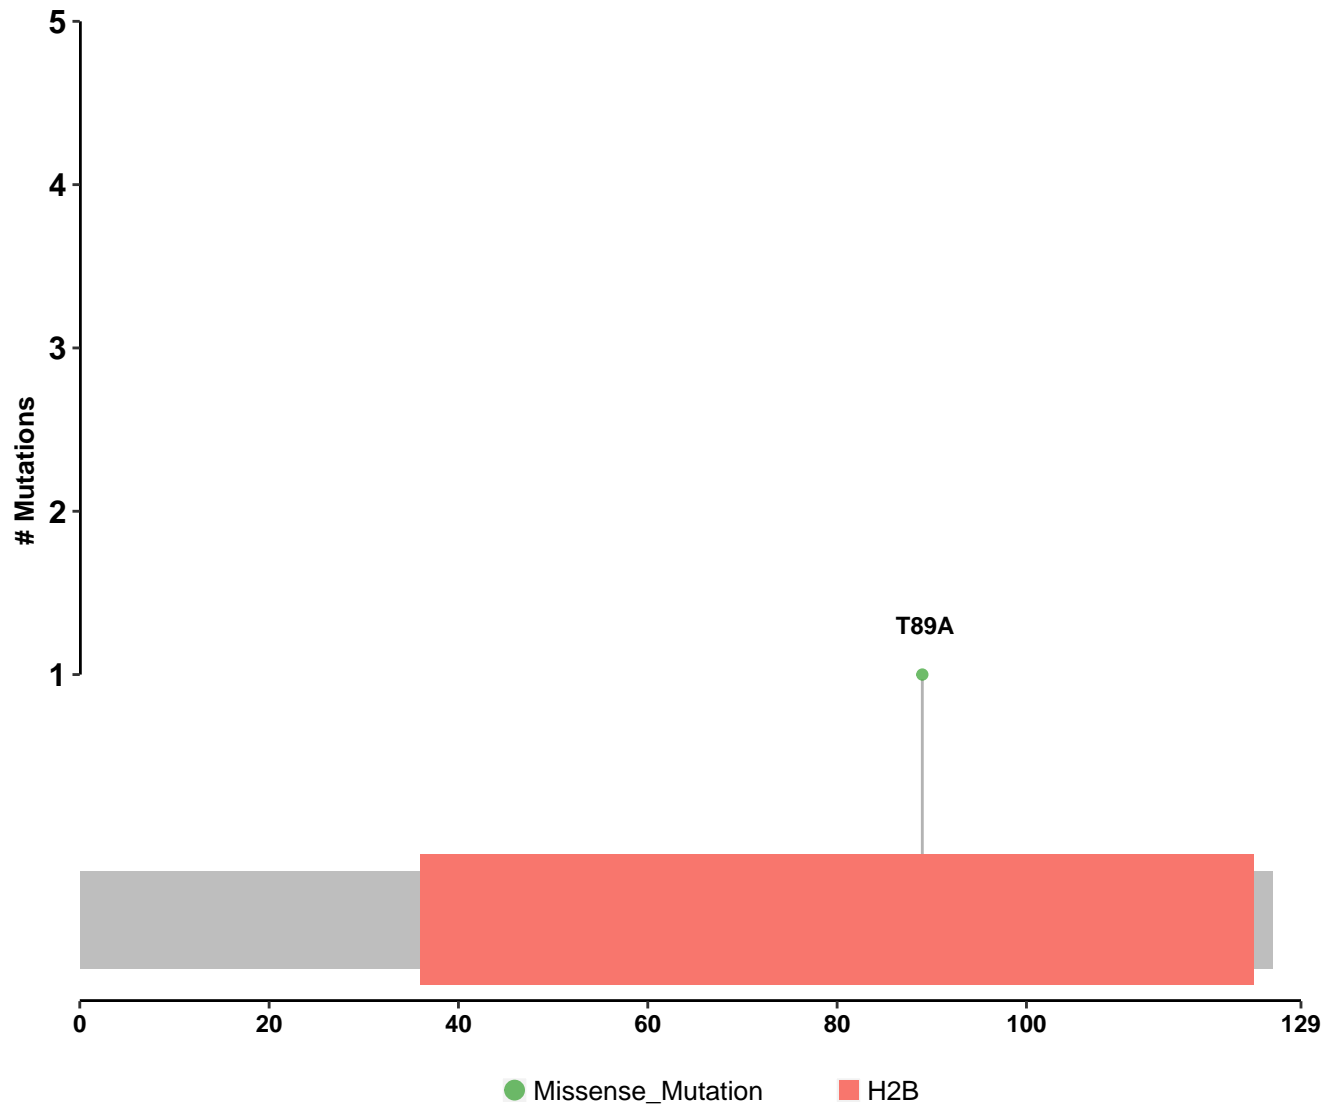

IDH2: [Somatic Mutation Rate: 3.03%]

NM\_002168

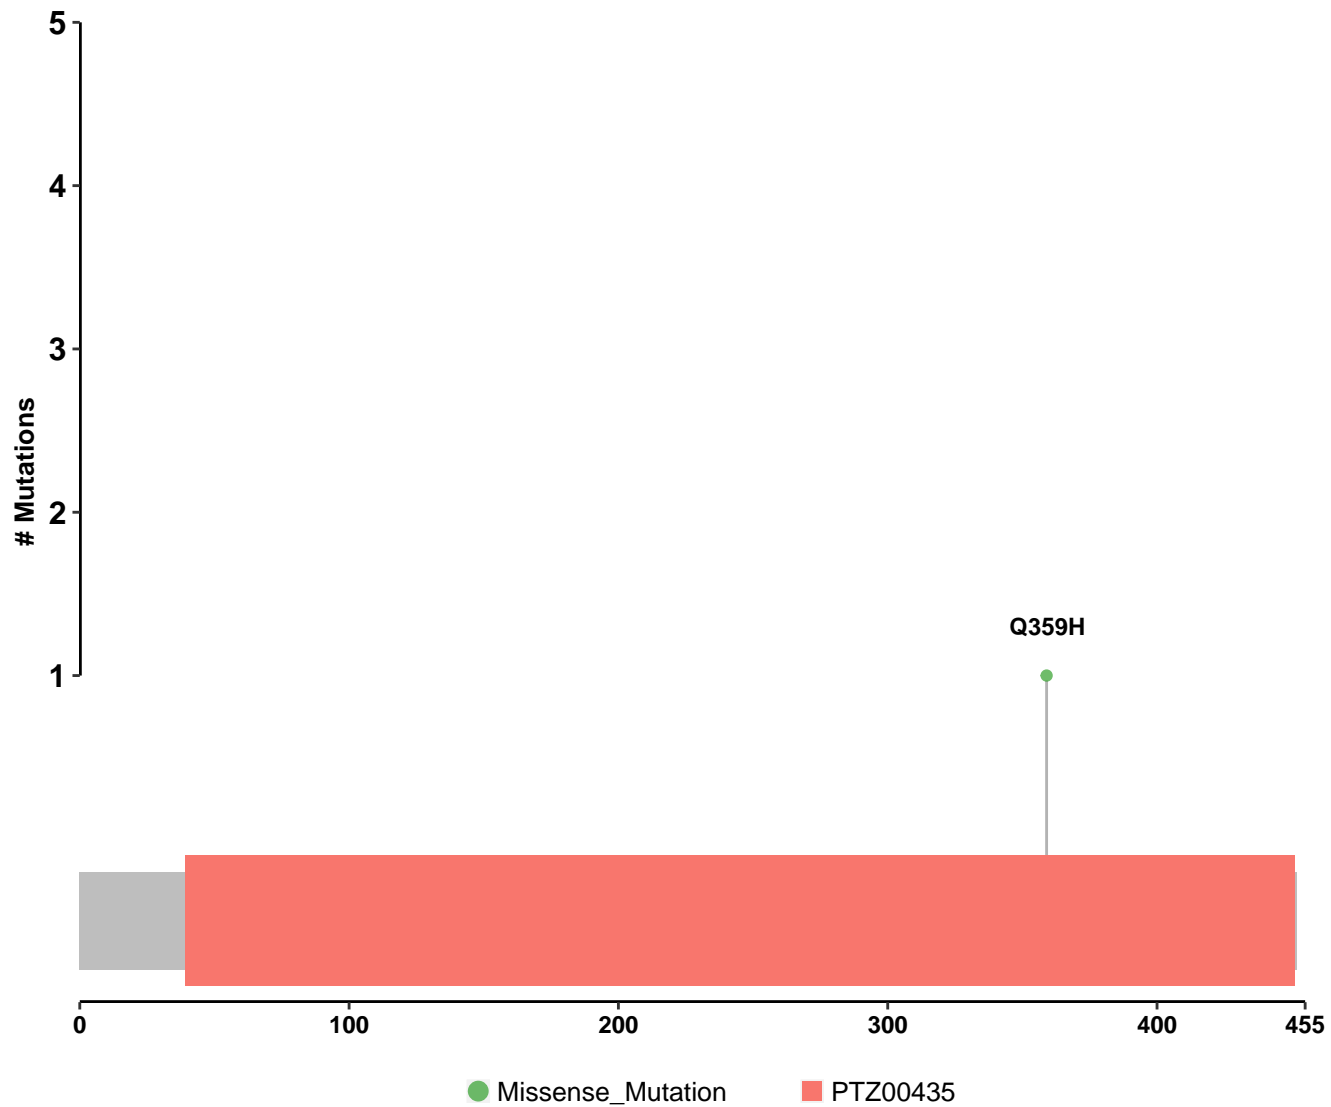

IKBKE: [Somatic Mutation Rate: 3.03%]

NM\_014002

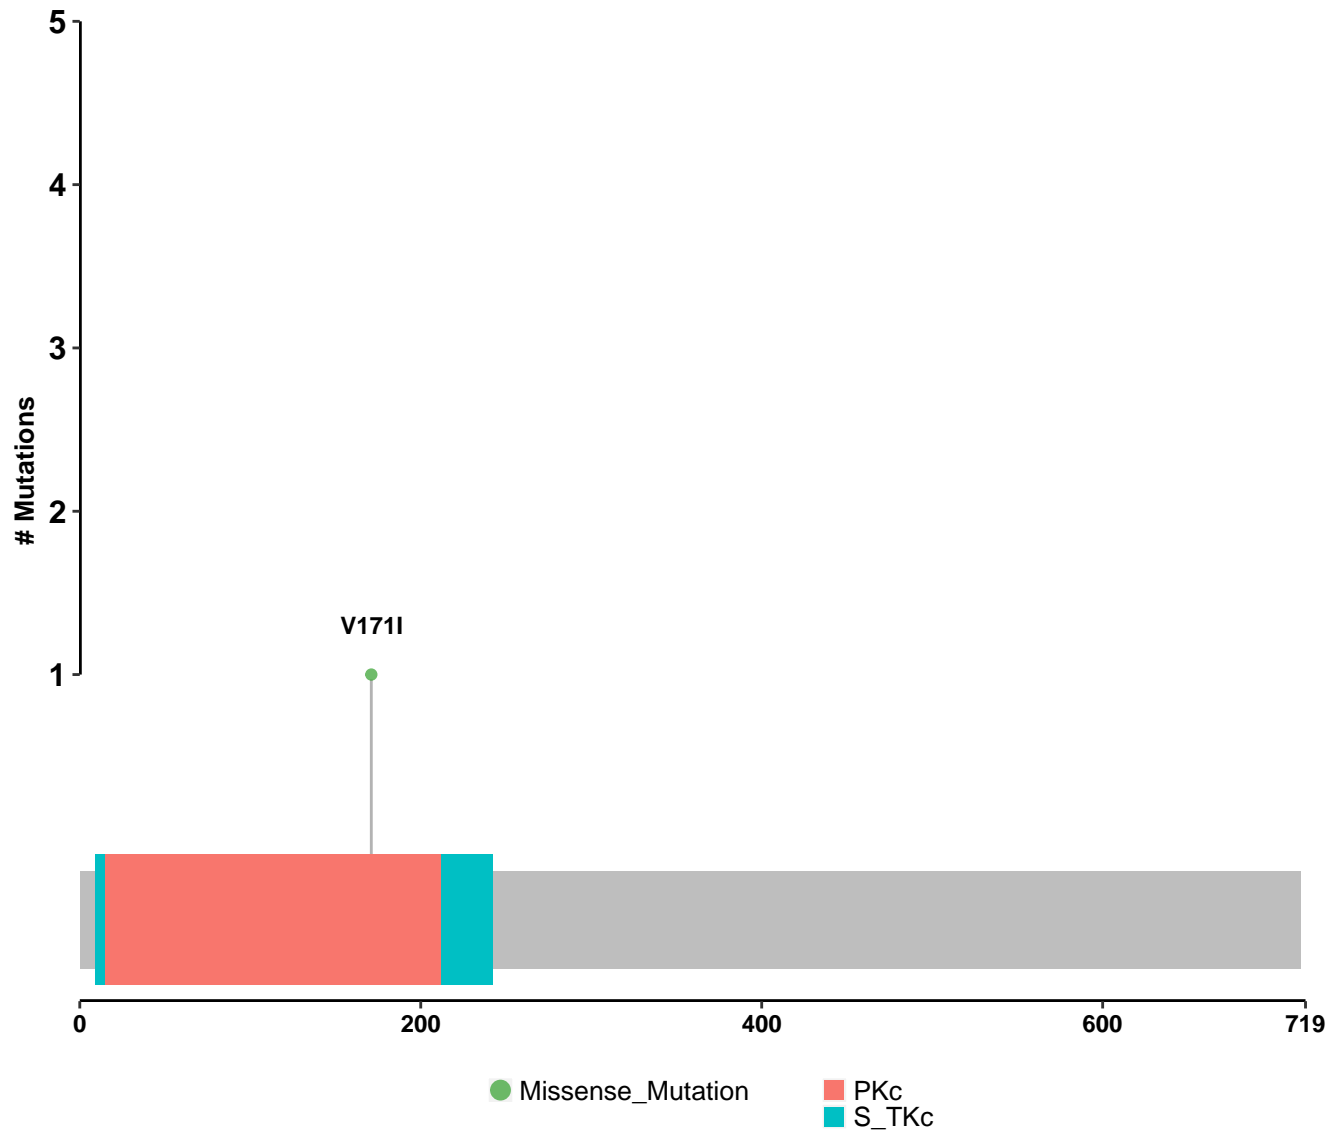

# IL1B: [Somatic Mutation Rate: 3.03%]

NM\_000576

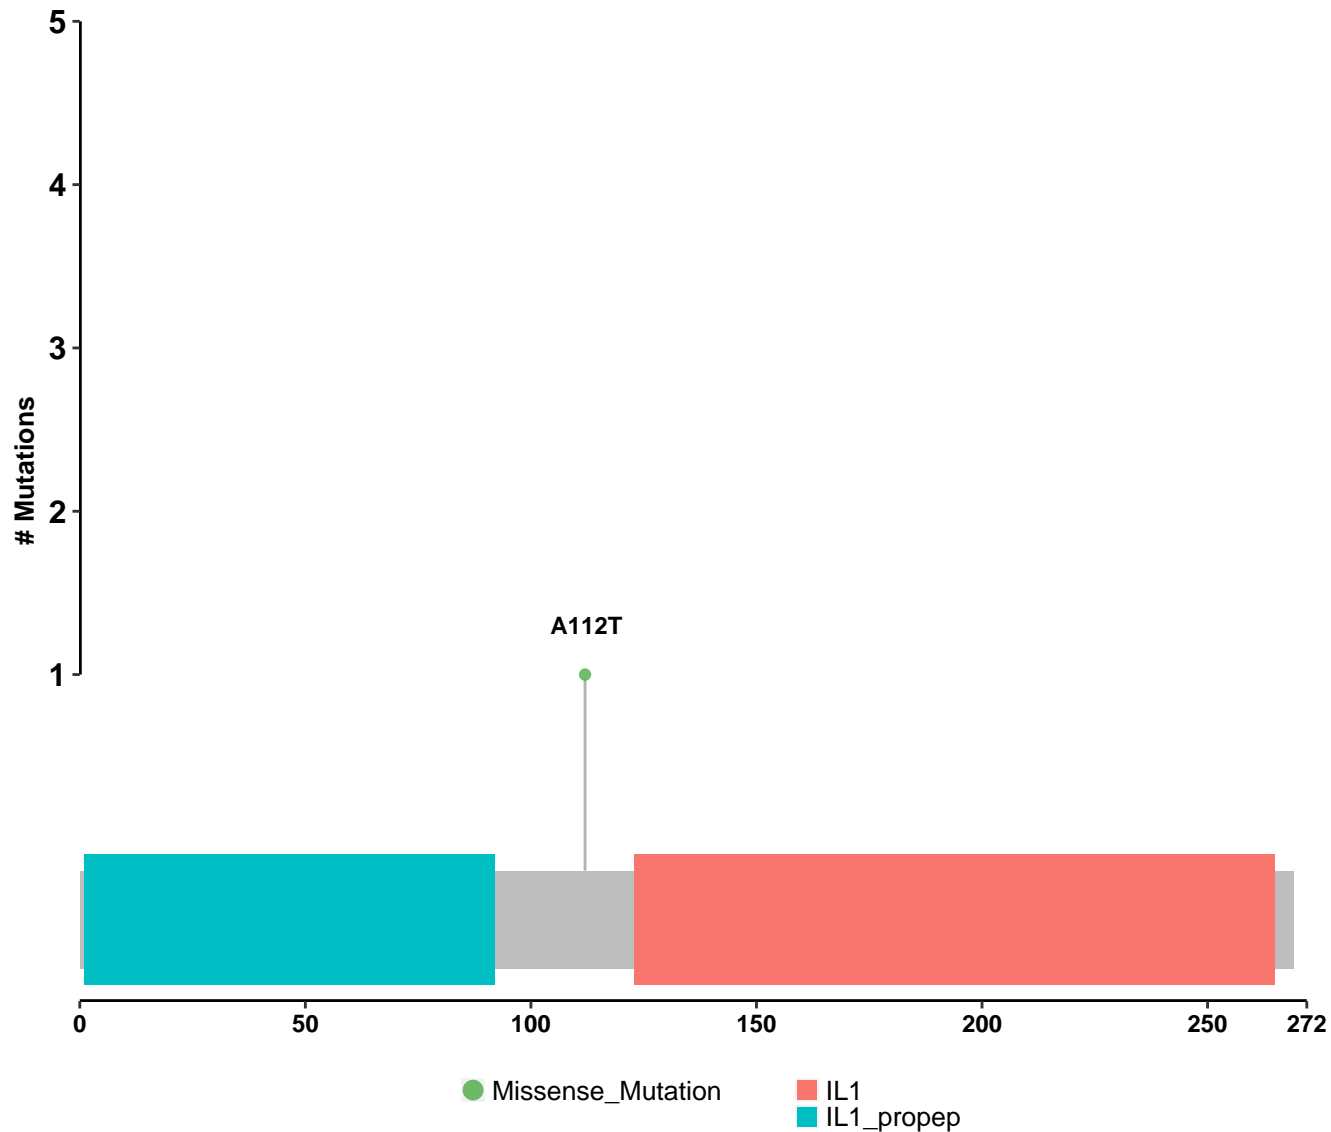

# IRF7: [Somatic Mutation Rate: 3.03%]

NM\_004031

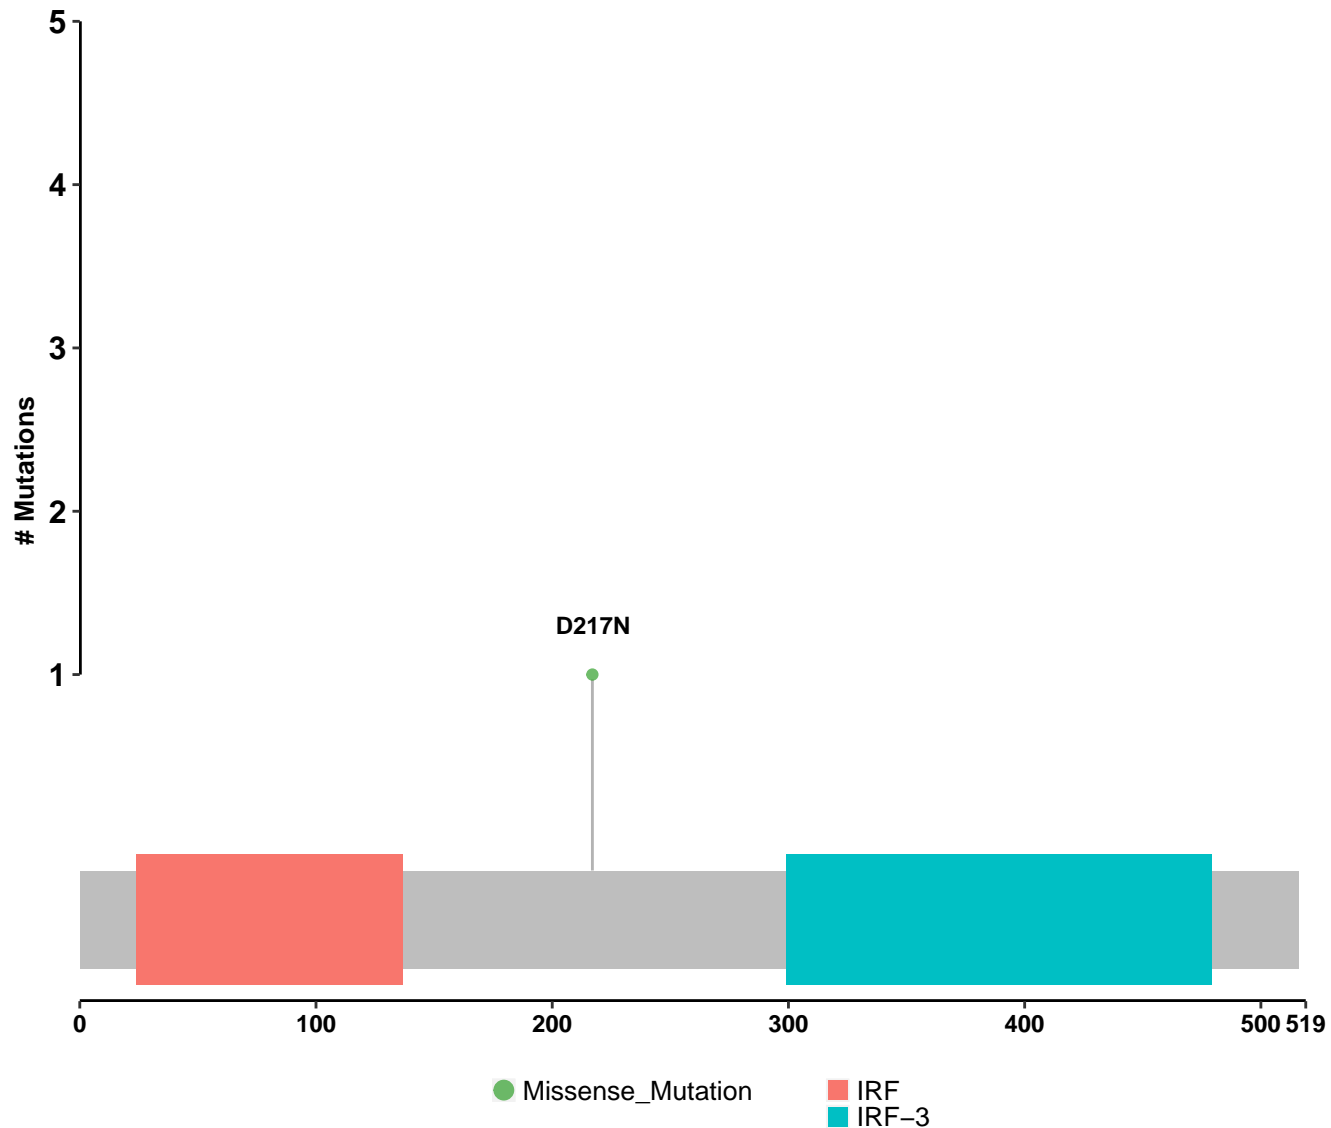

# ISG15: [Somatic Mutation Rate: 3.03%]

NM\_005101

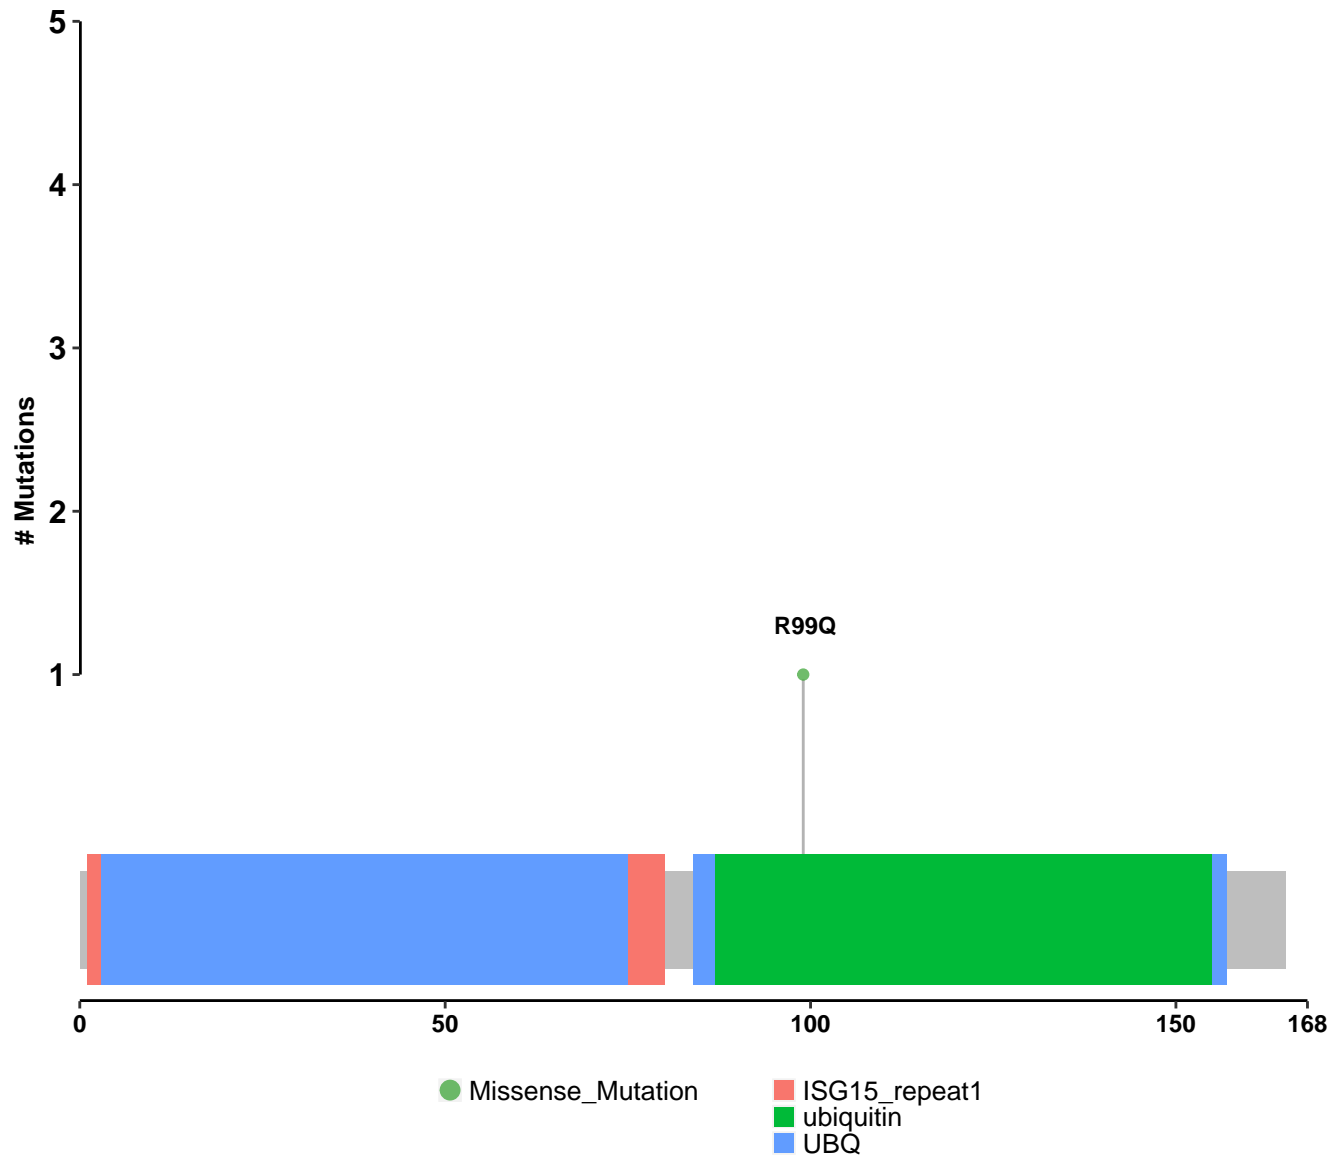

# KDM6A: [Somatic Mutation Rate: 3.03%]

NM\_021140

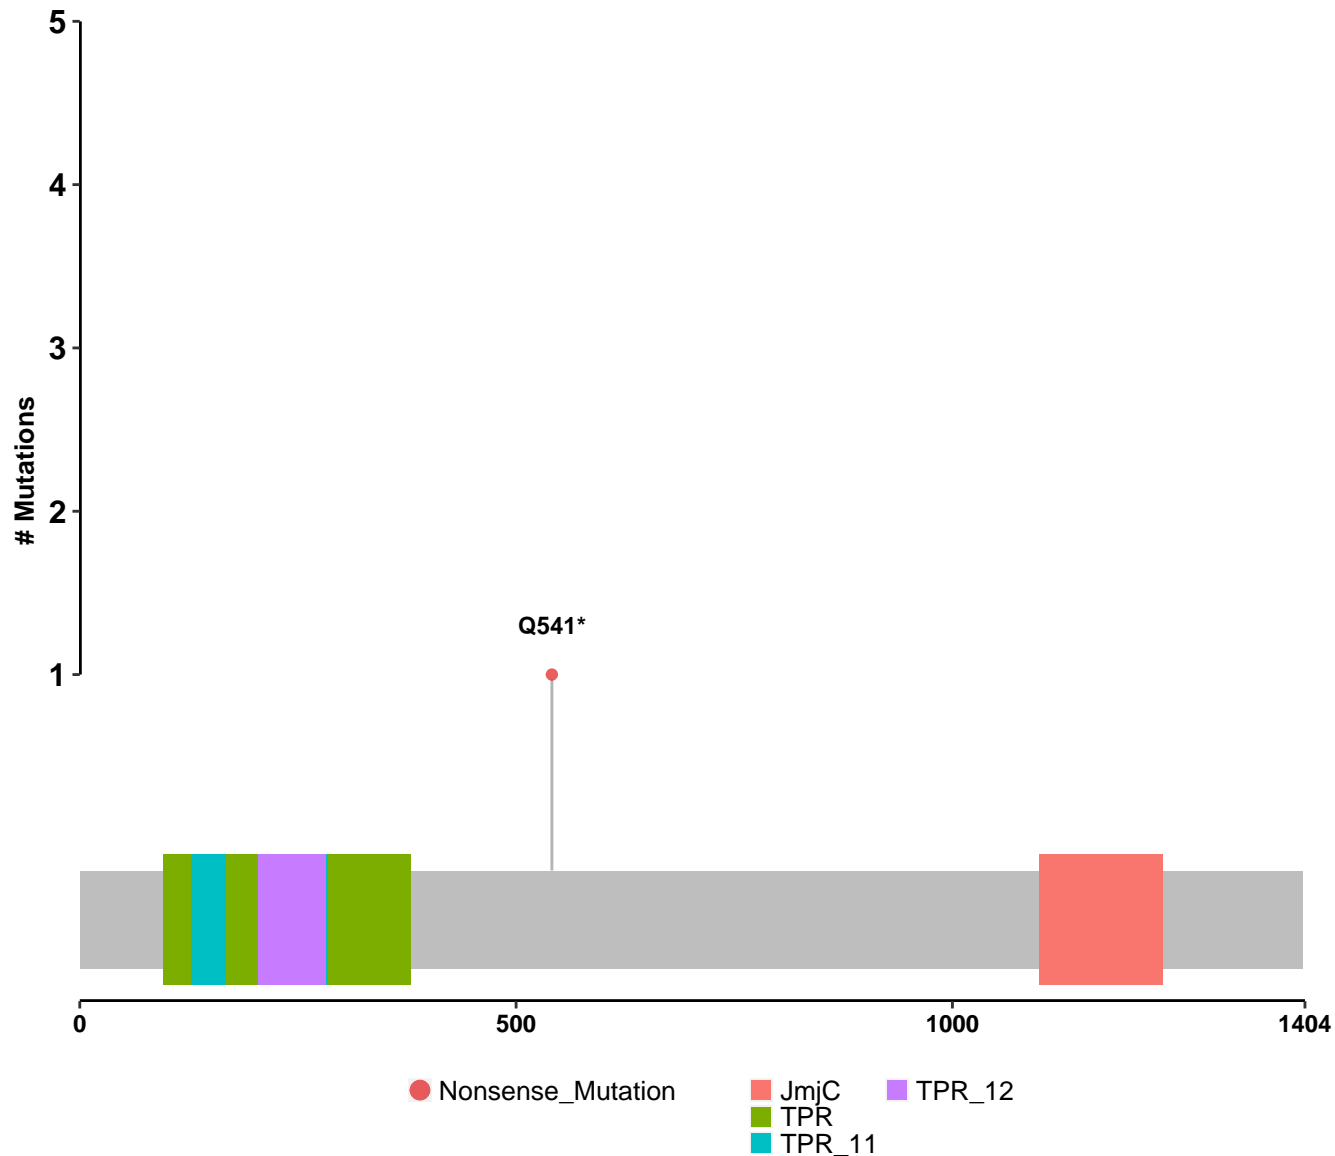



# MAP3K7: [Somatic Mutation Rate: 3.03%]

NM\_145331

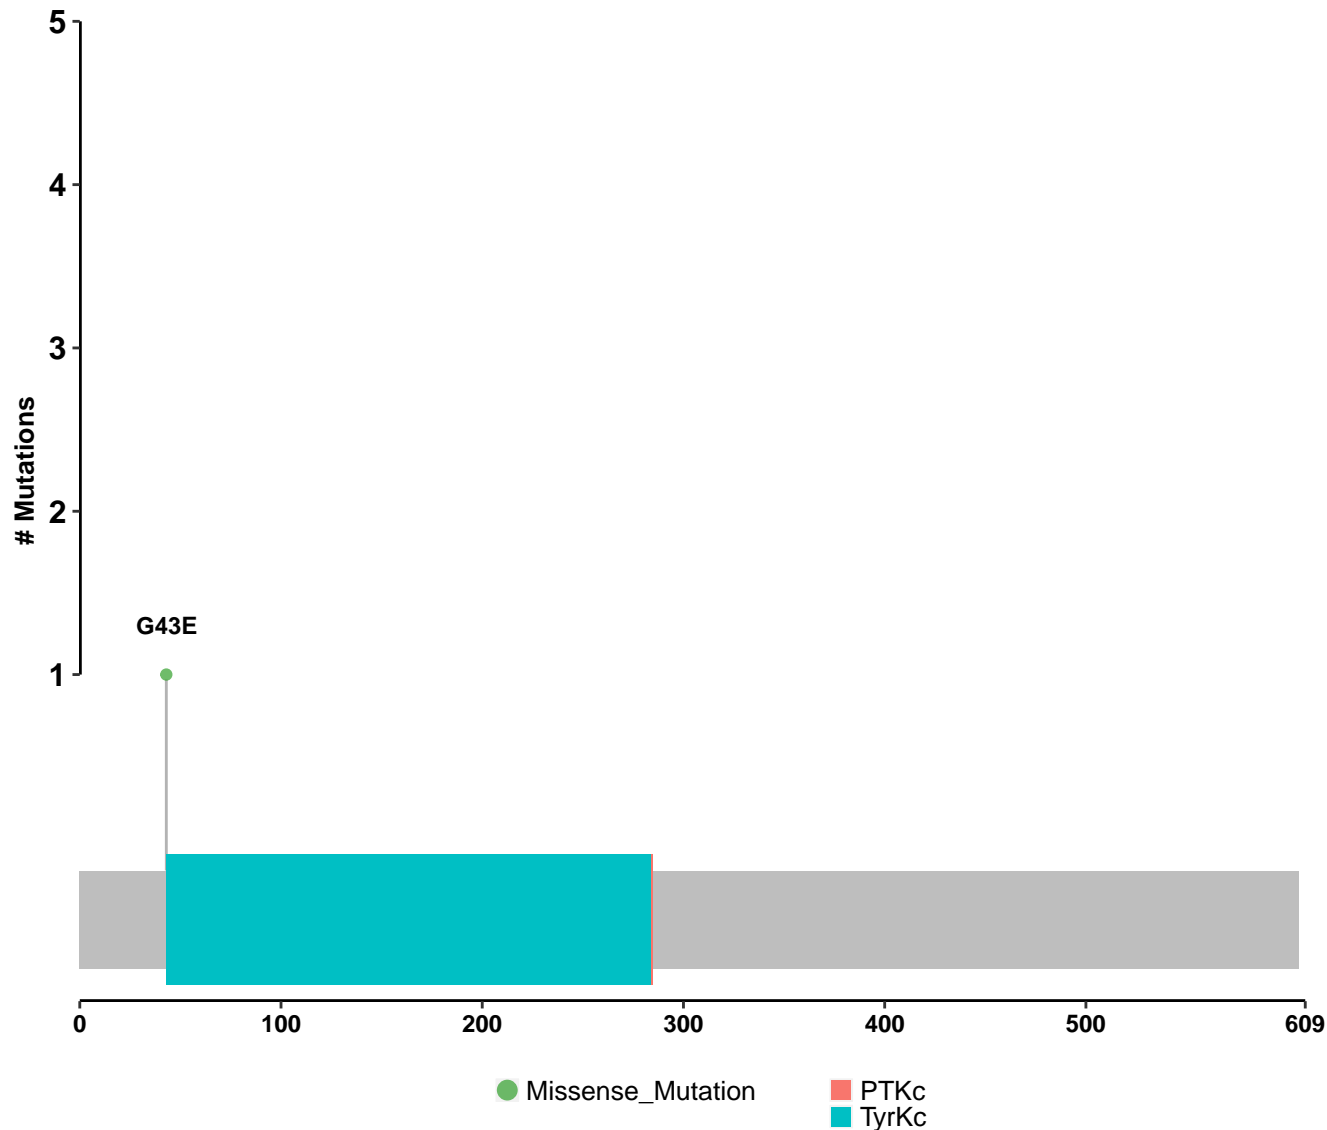

# NSD1: [Somatic Mutation Rate: 3.03%]

NM\_022455

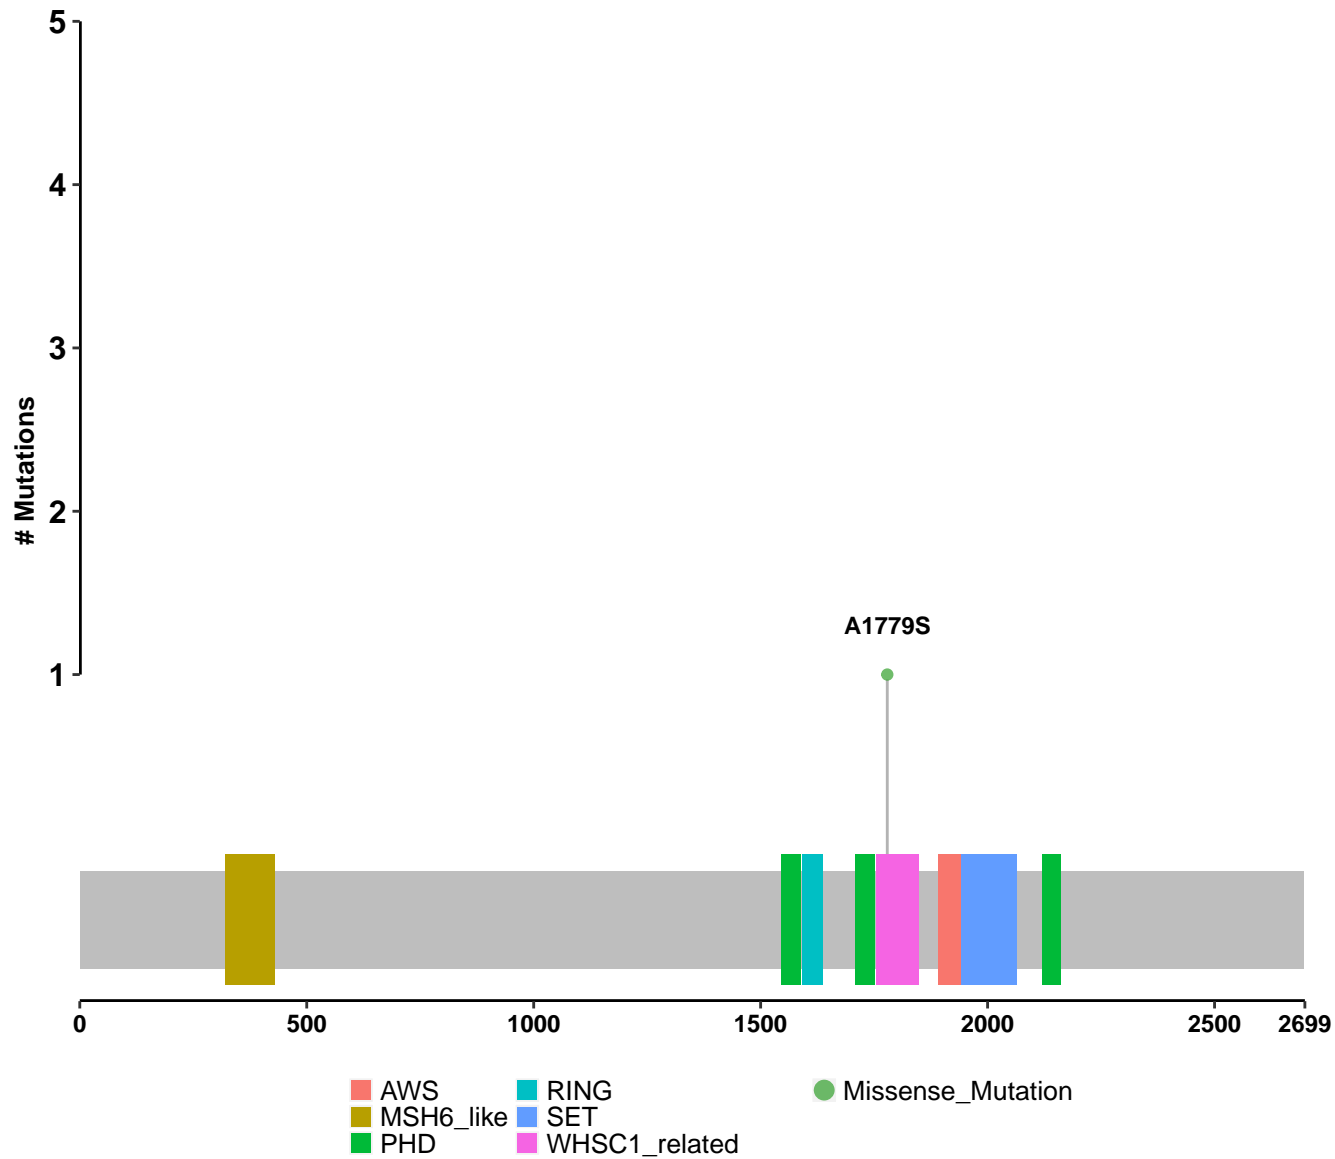

# TRIM25: [Somatic Mutation Rate: 3.03%]

NM\_005082

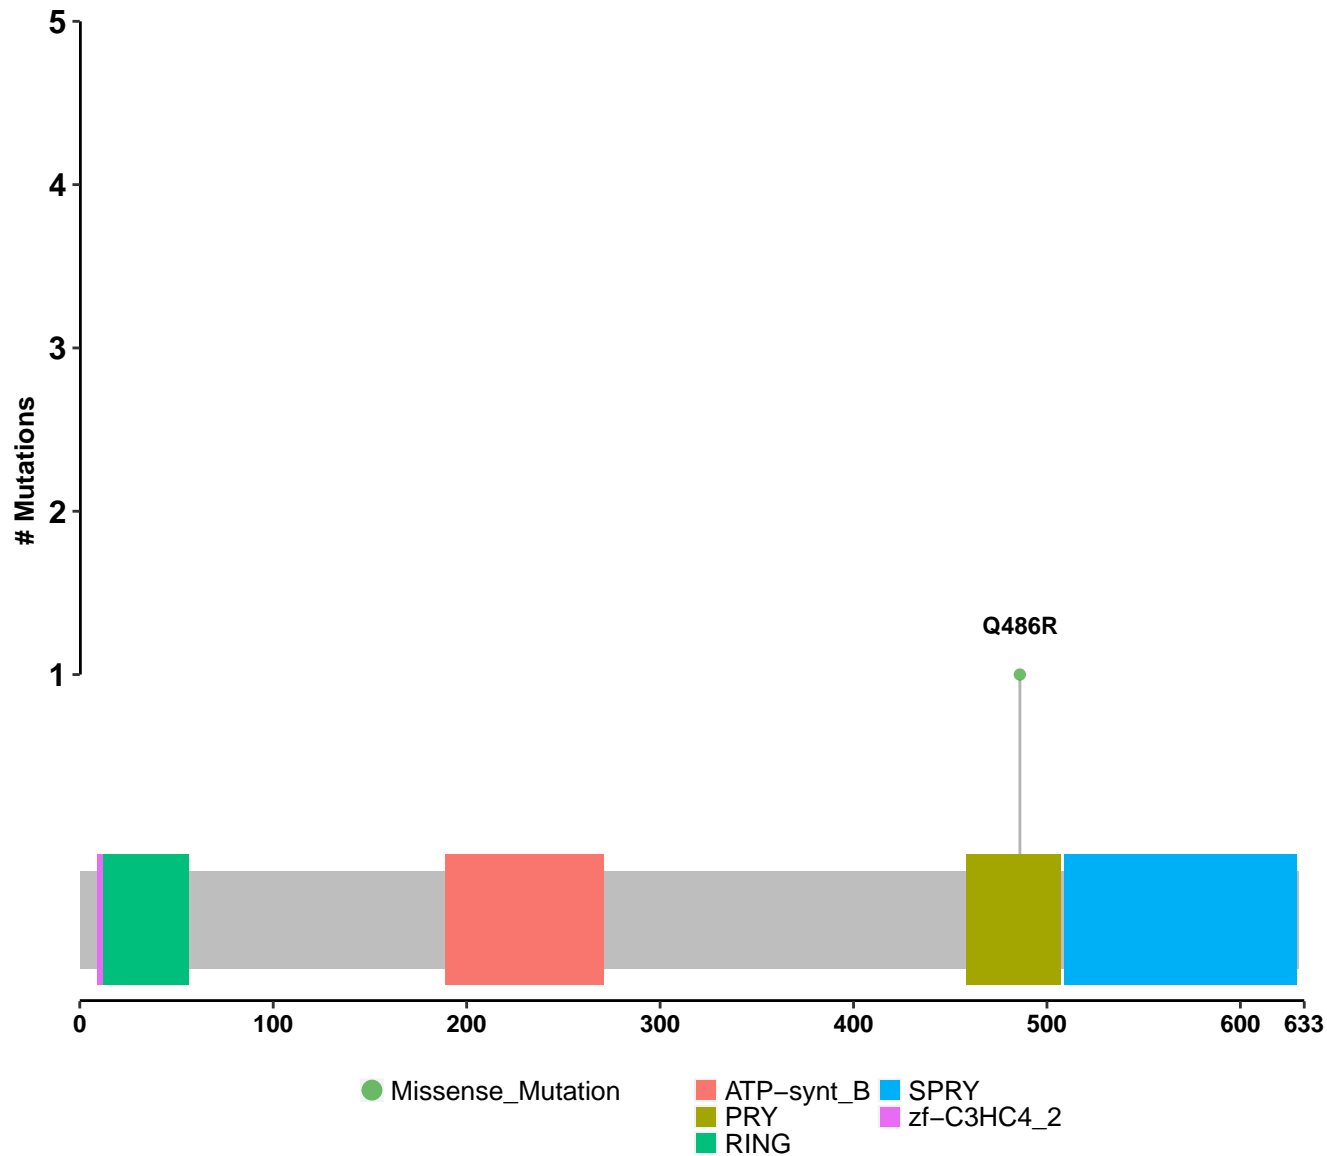

# ZBP1: [Somatic Mutation Rate: 3.03%]

NM\_030776

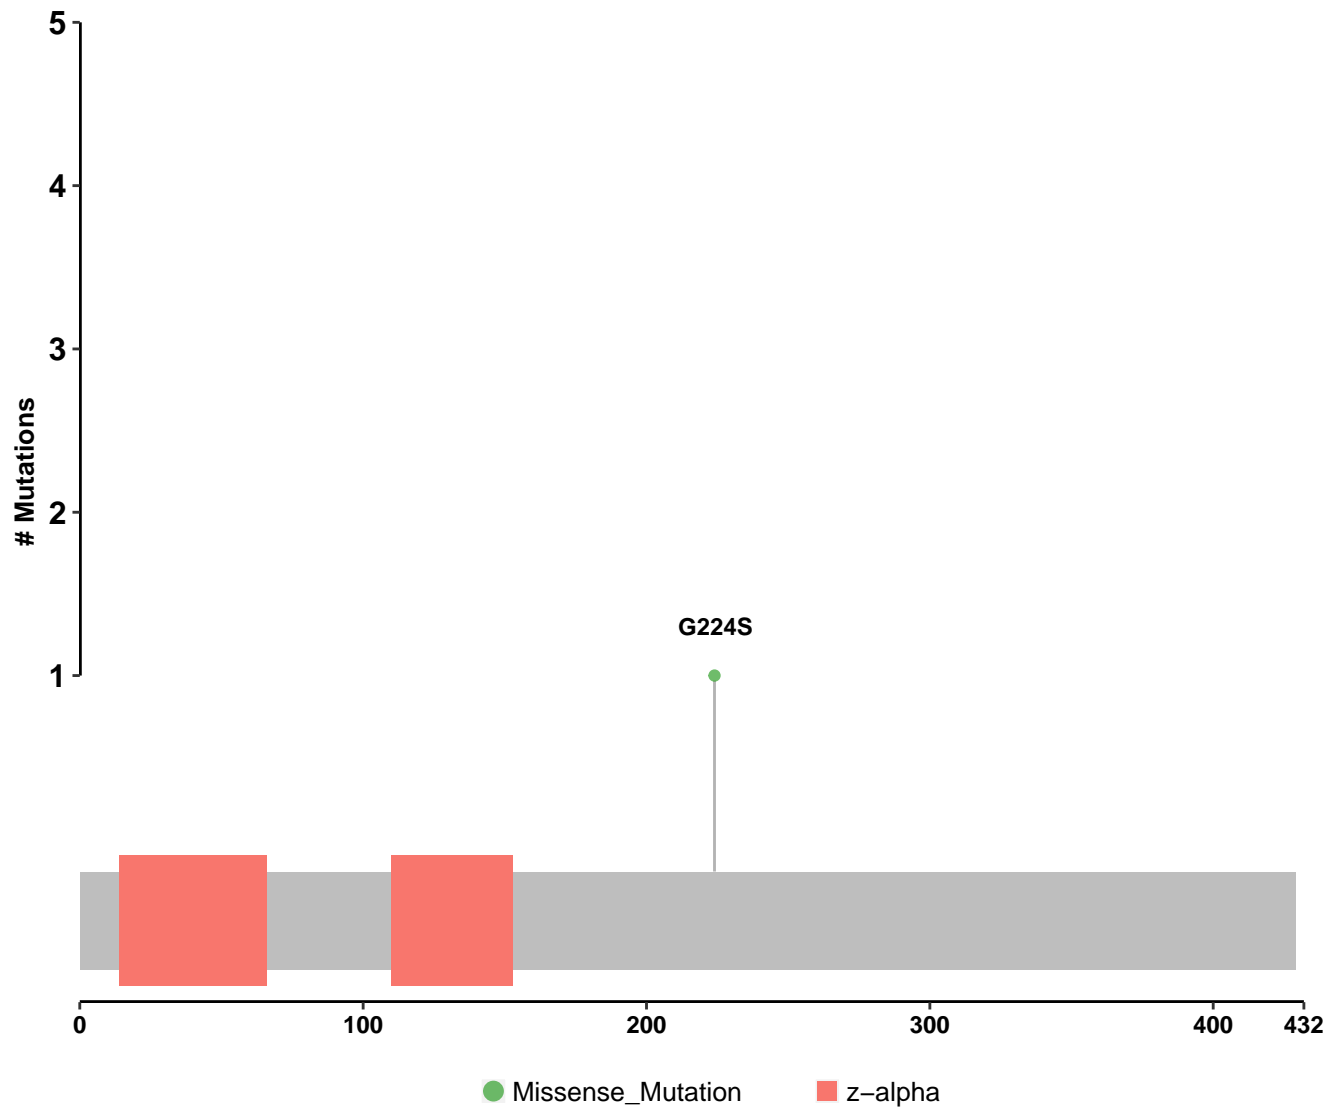

# LIG4: [Somatic Mutation Rate: 9.09%]

NM\_001098268

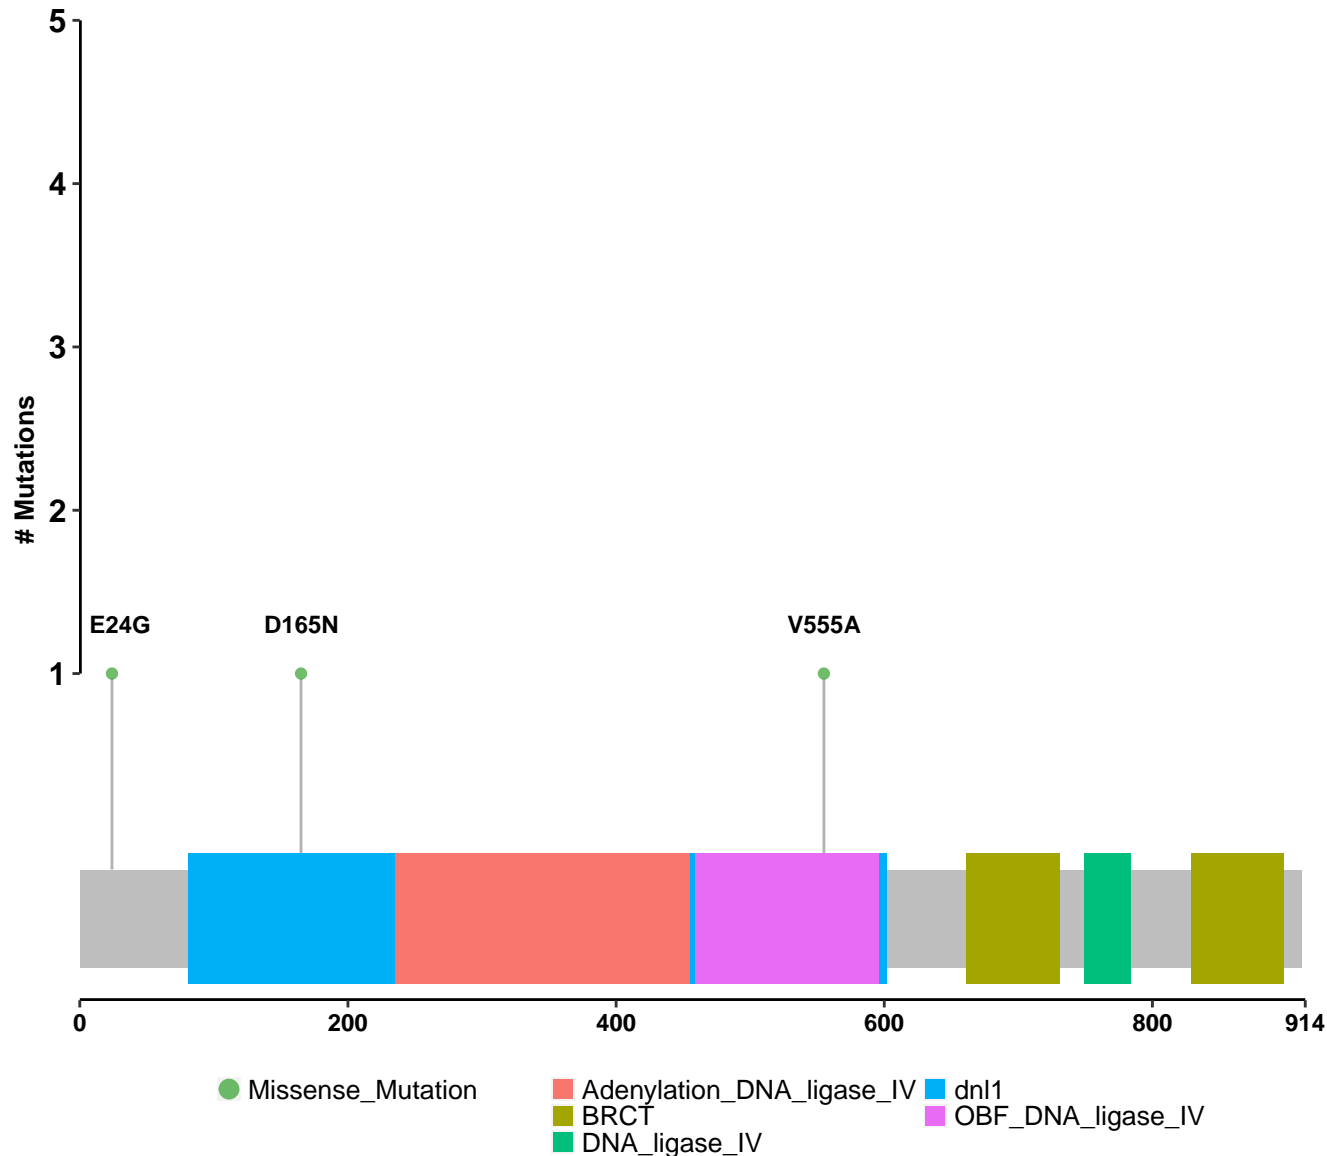

# BCL6: [Somatic Mutation Rate: 12.12%]

NM\_001130845

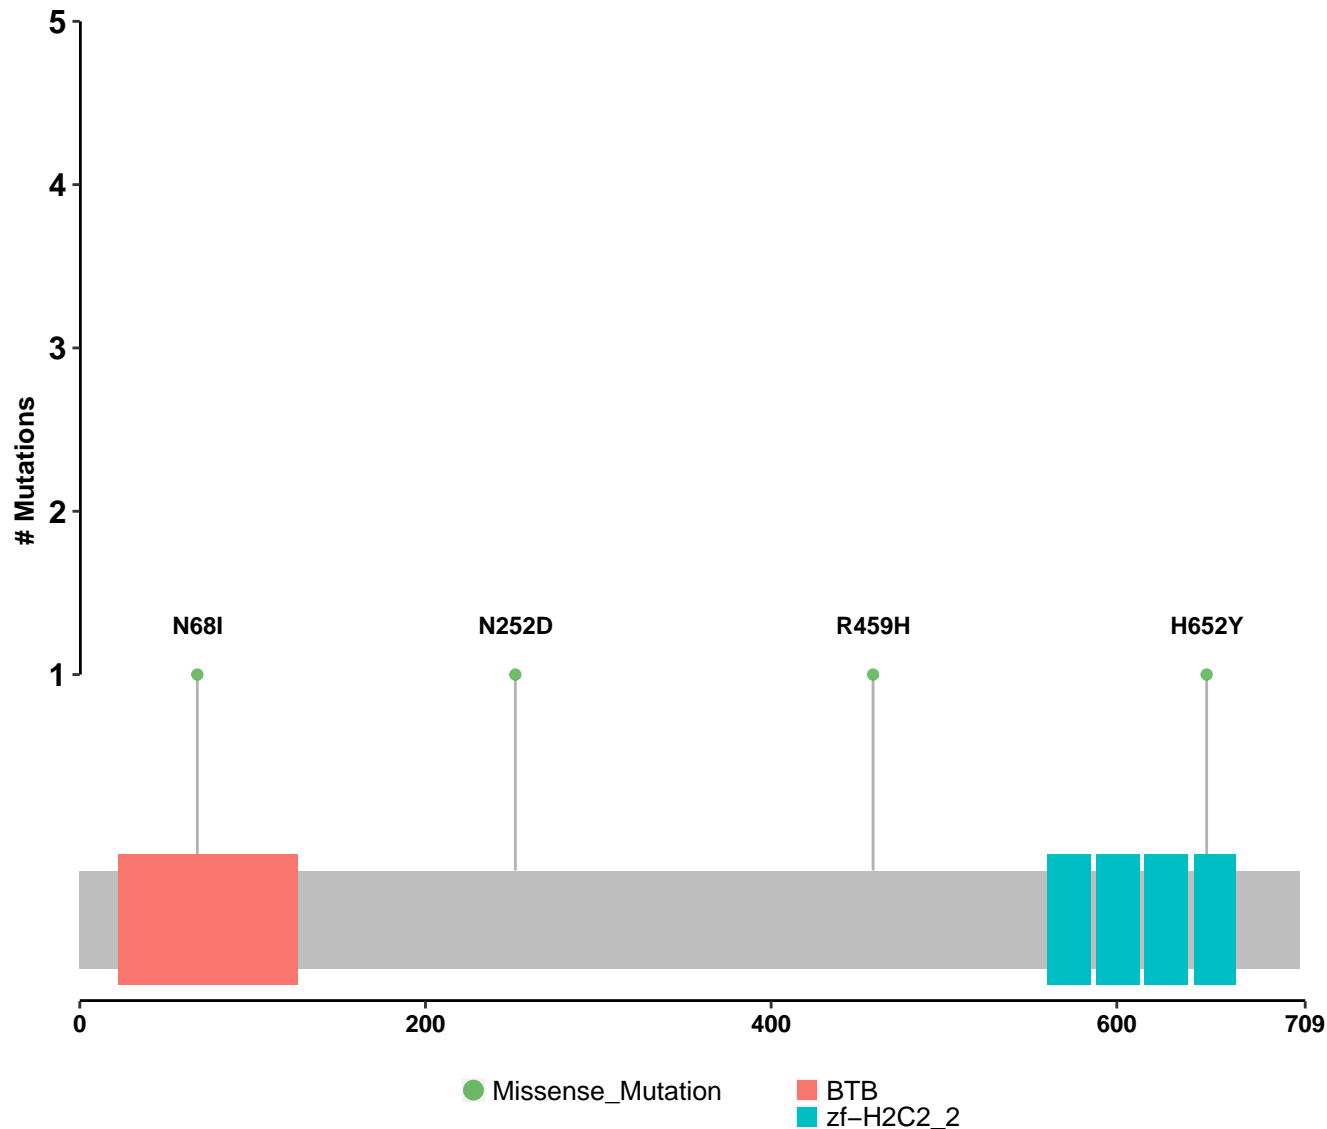

# BRAF: [Somatic Mutation Rate: 15.15%]

NM\_004333

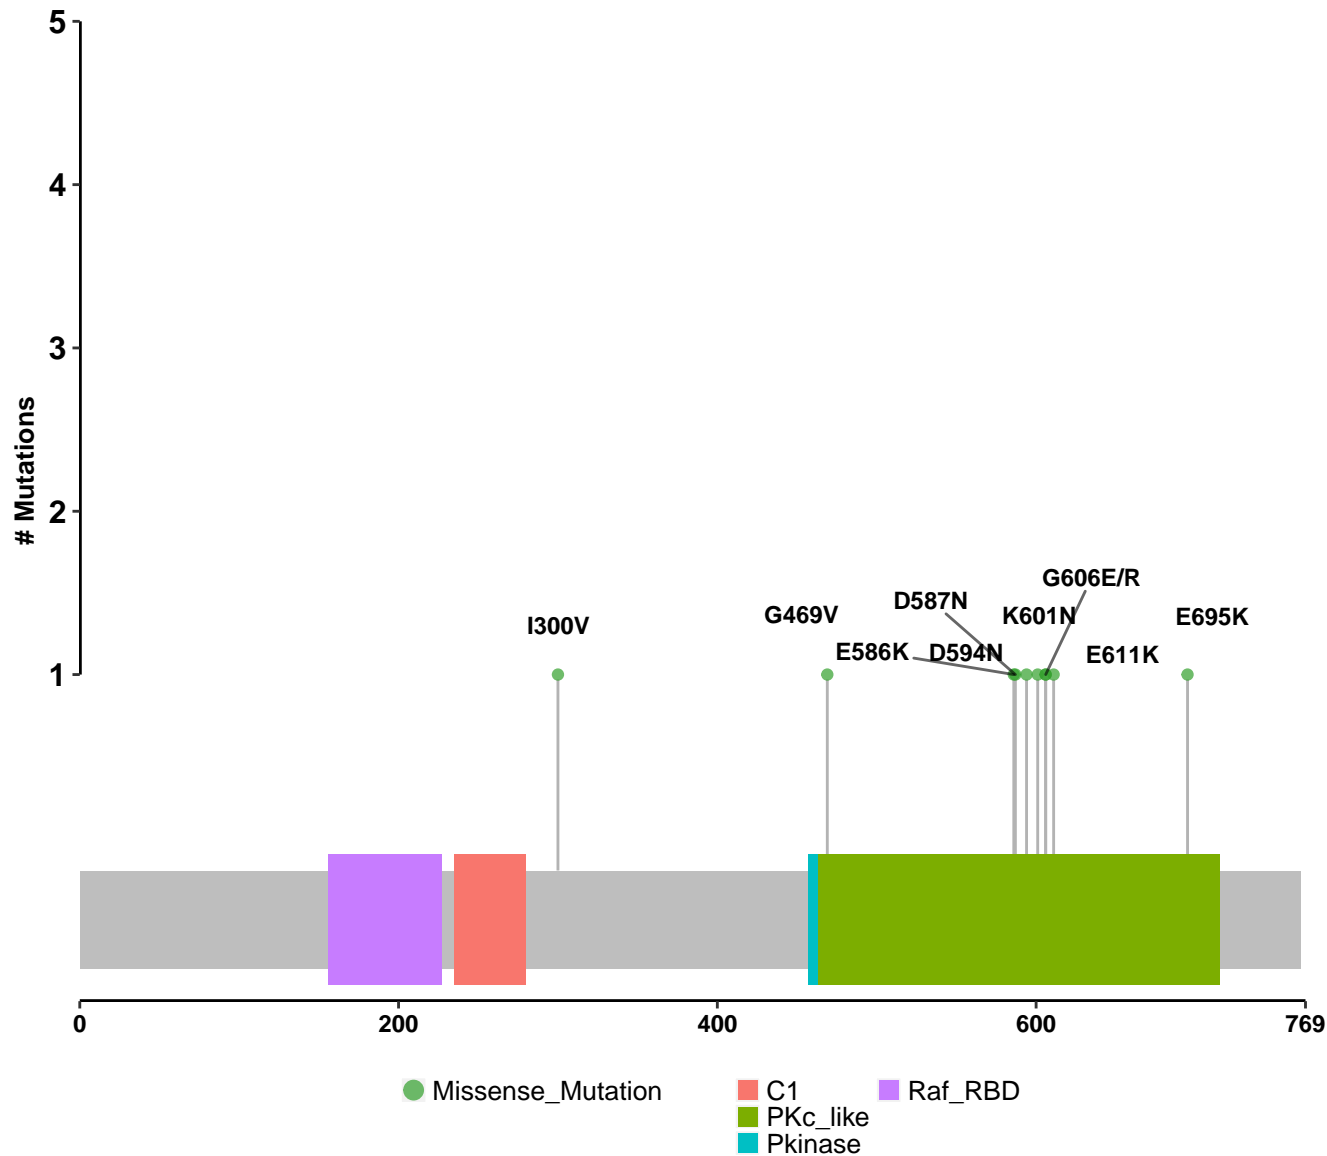

# FAM46C: [Somatic Mutation Rate: 15.15%]

NM\_017709

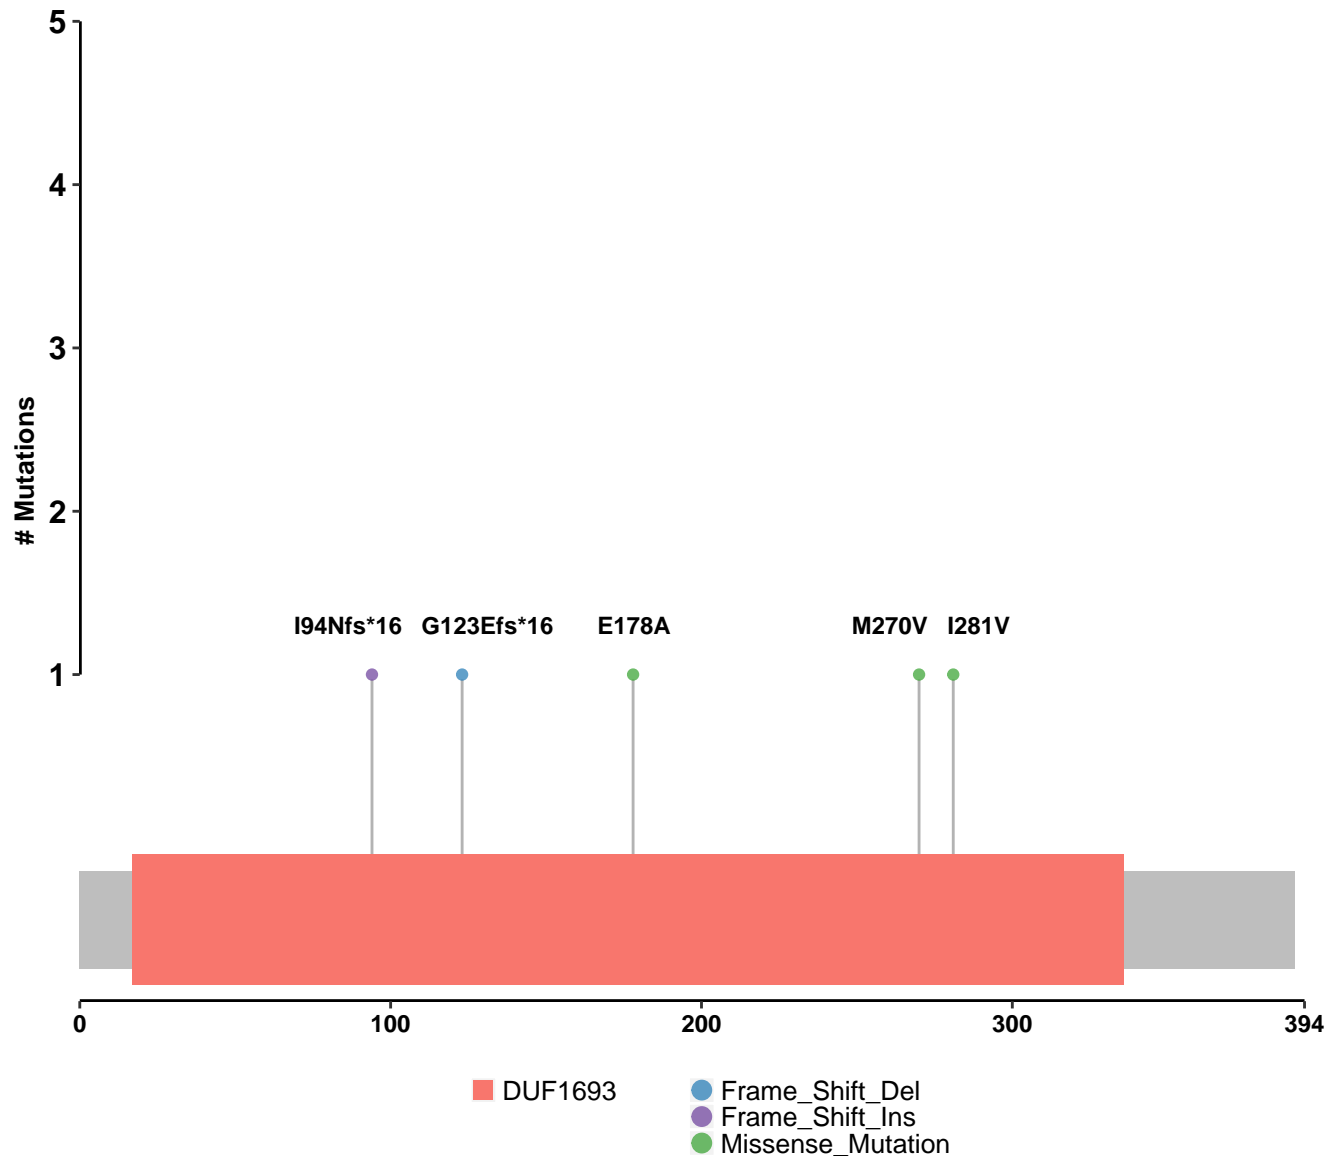



ATR: [Somatic Mutation Rate: 9.09%]

NM\_001184

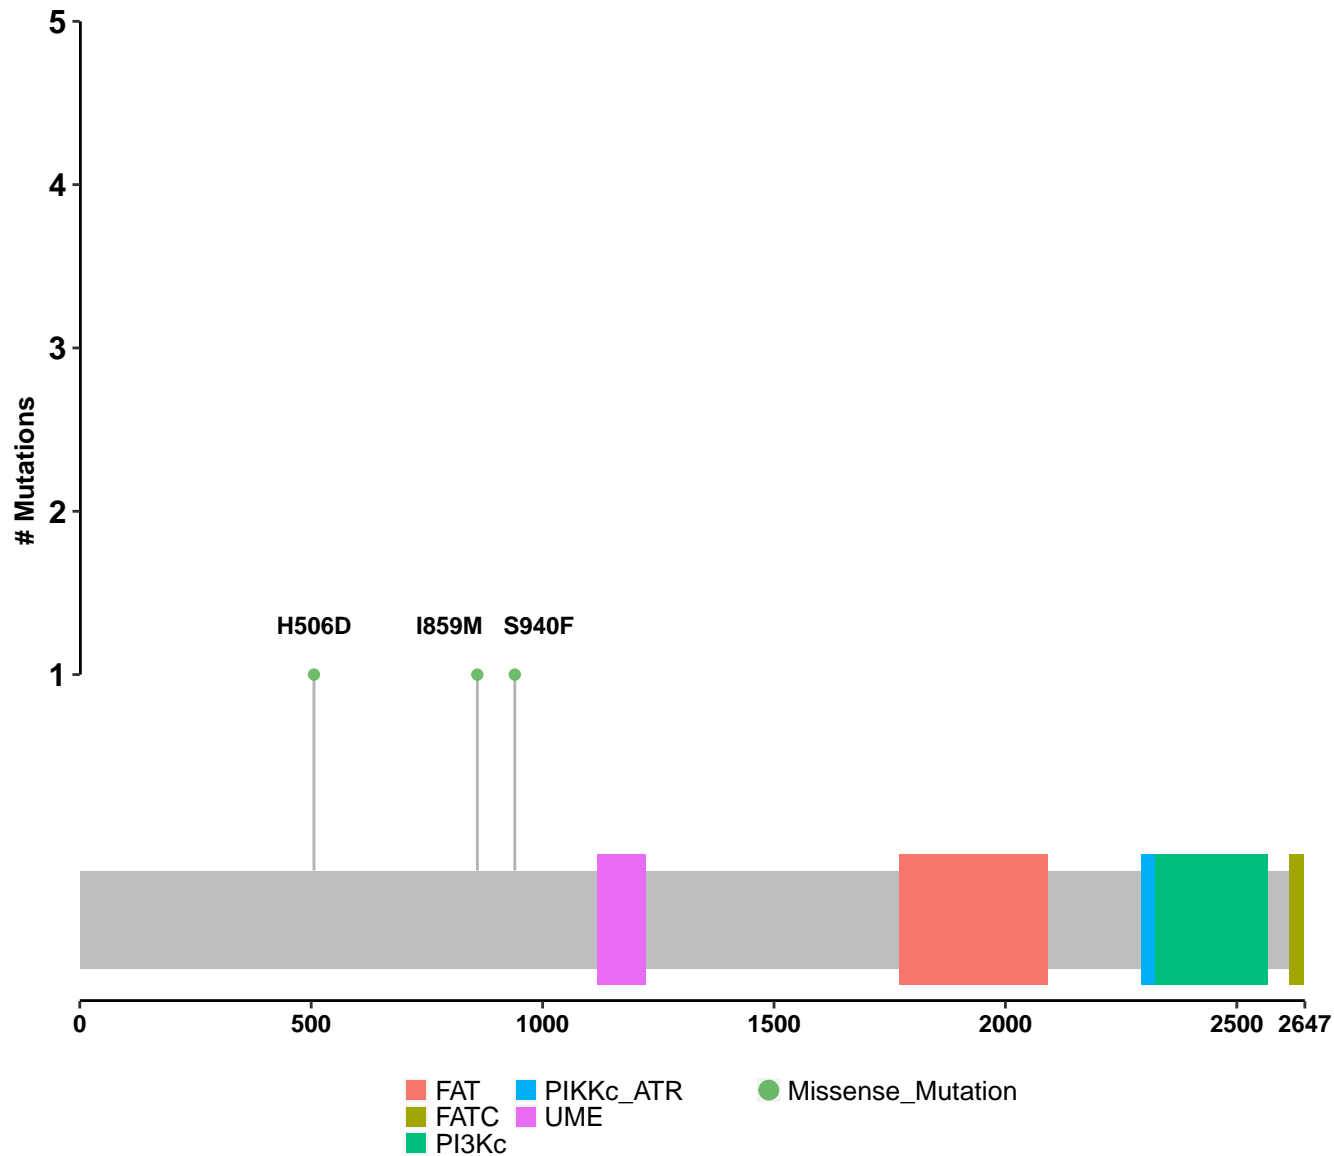

# DIS3: [Somatic Mutation Rate: 12.12%]

NM\_014953

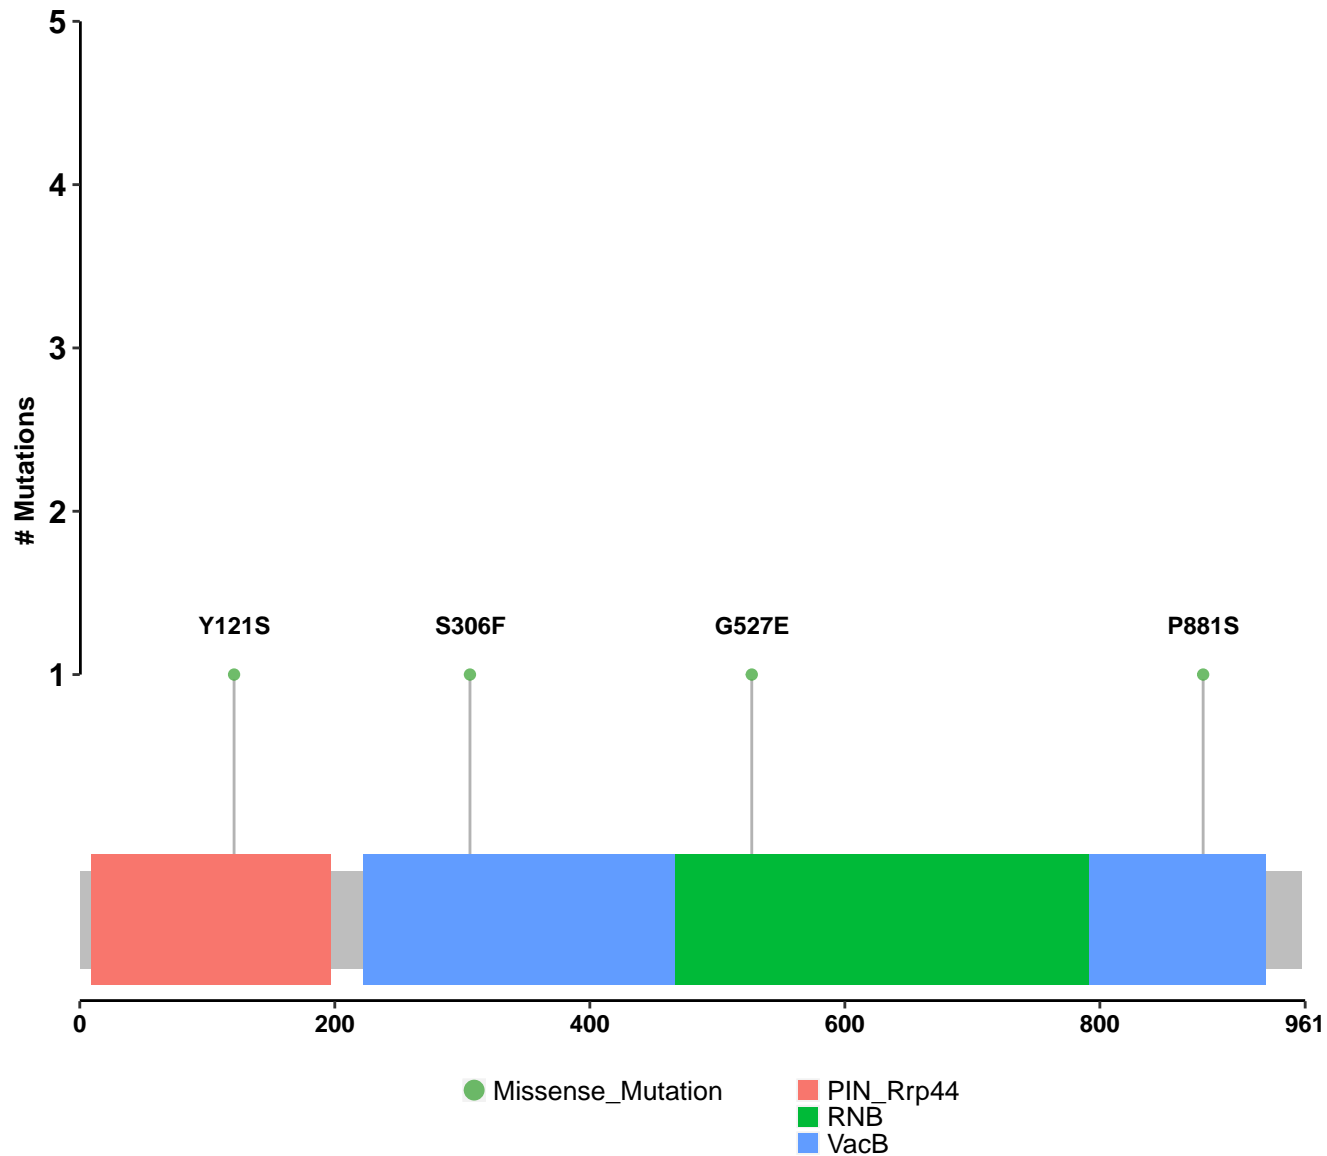

# FANCA: [Somatic Mutation Rate: 9.09%]

NM\_000135

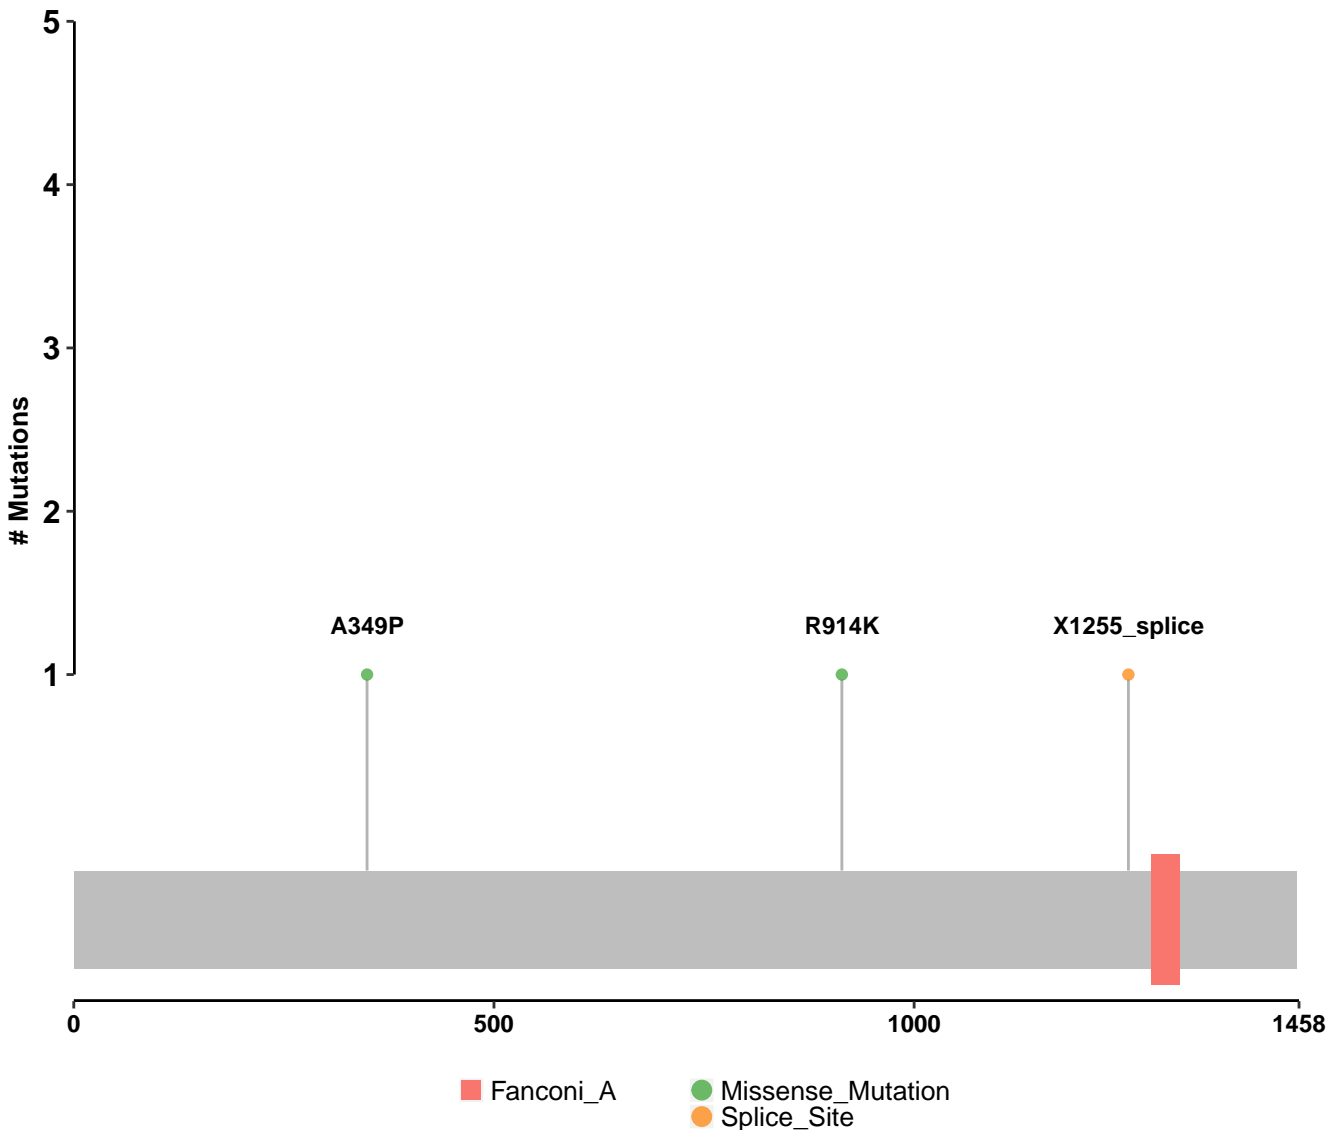

# FANCI: [Somatic Mutation Rate: 12.12%]

NM\_001113378

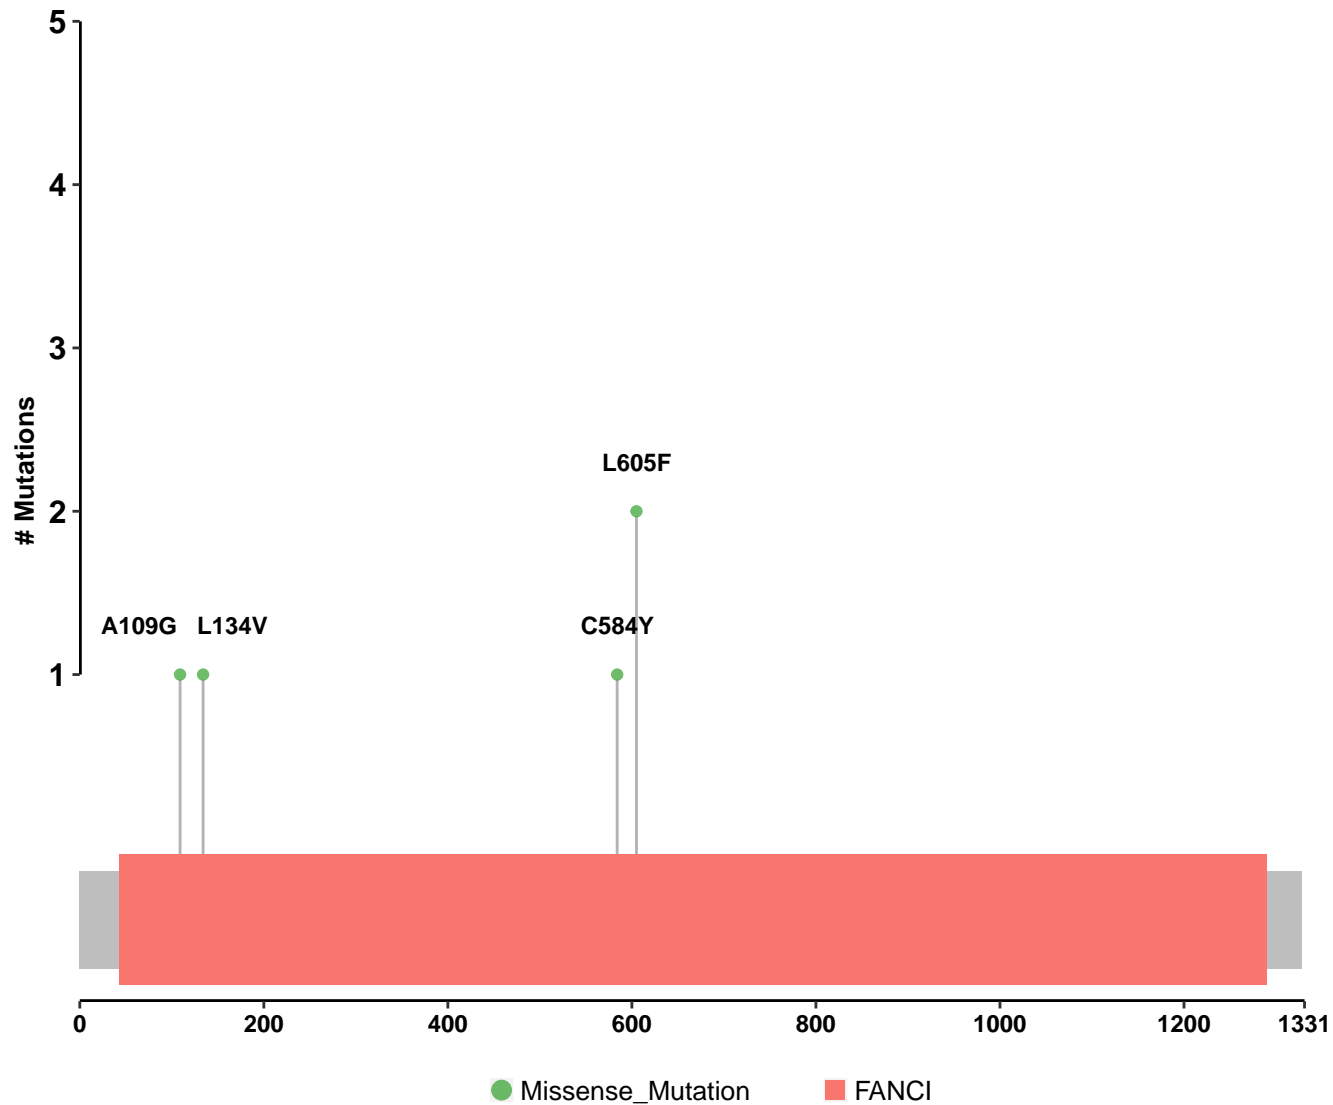

# FANCM: [Somatic Mutation Rate: 9.09%]

NM\_020937

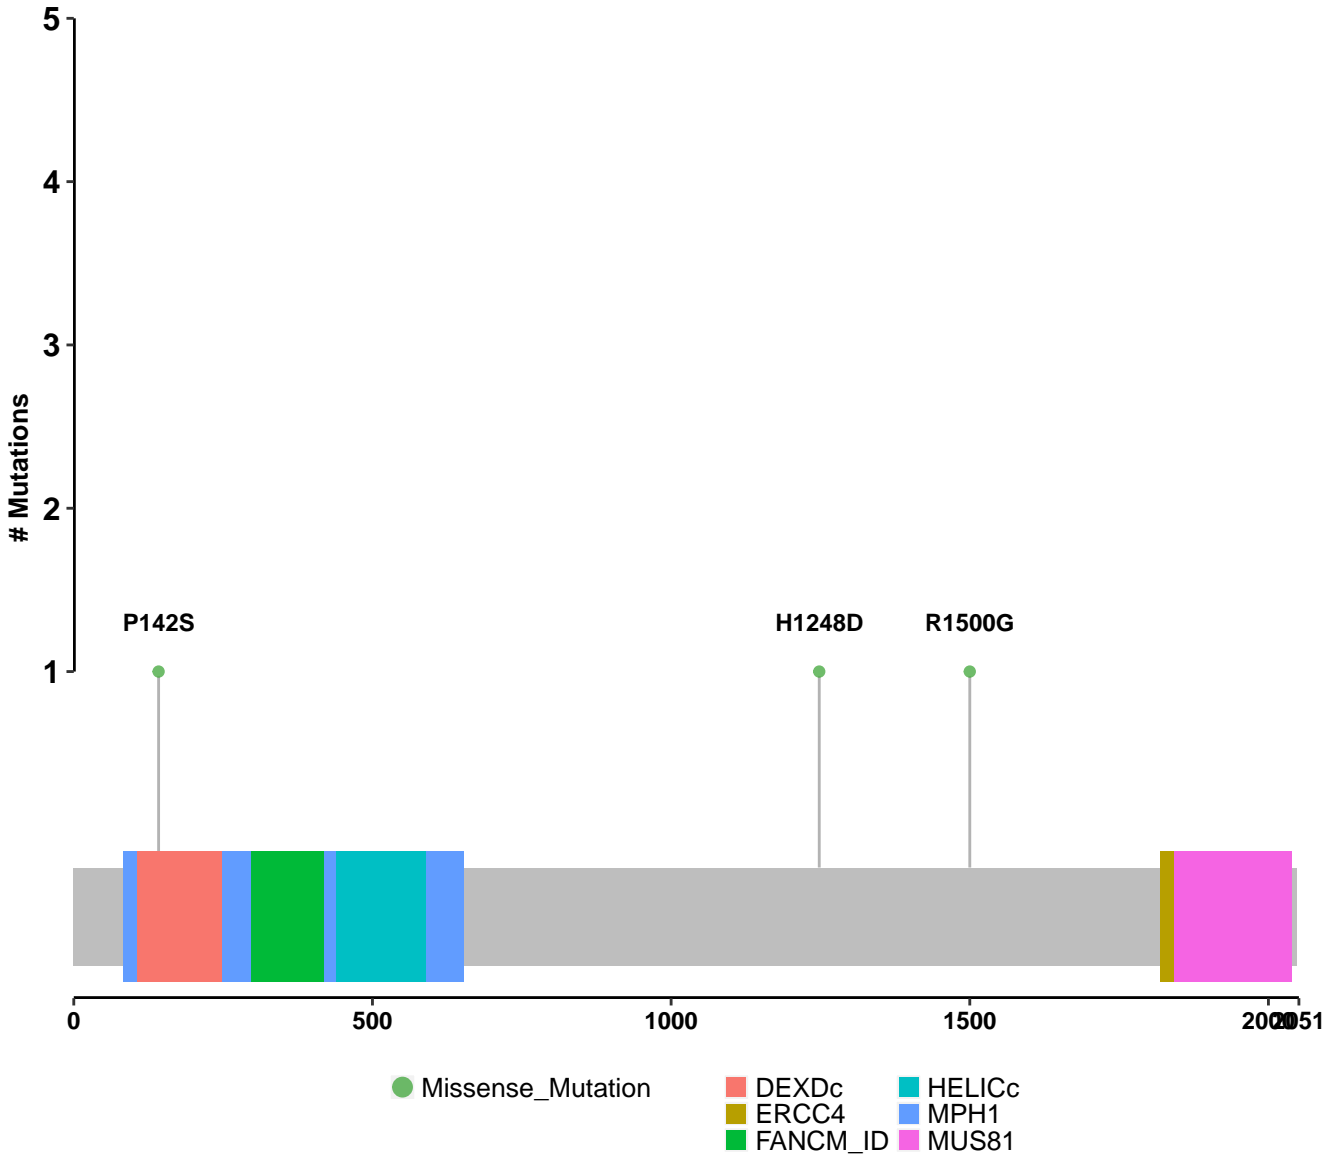

# TRAF3: [Somatic Mutation Rate: 12.12%]

NM\_145725

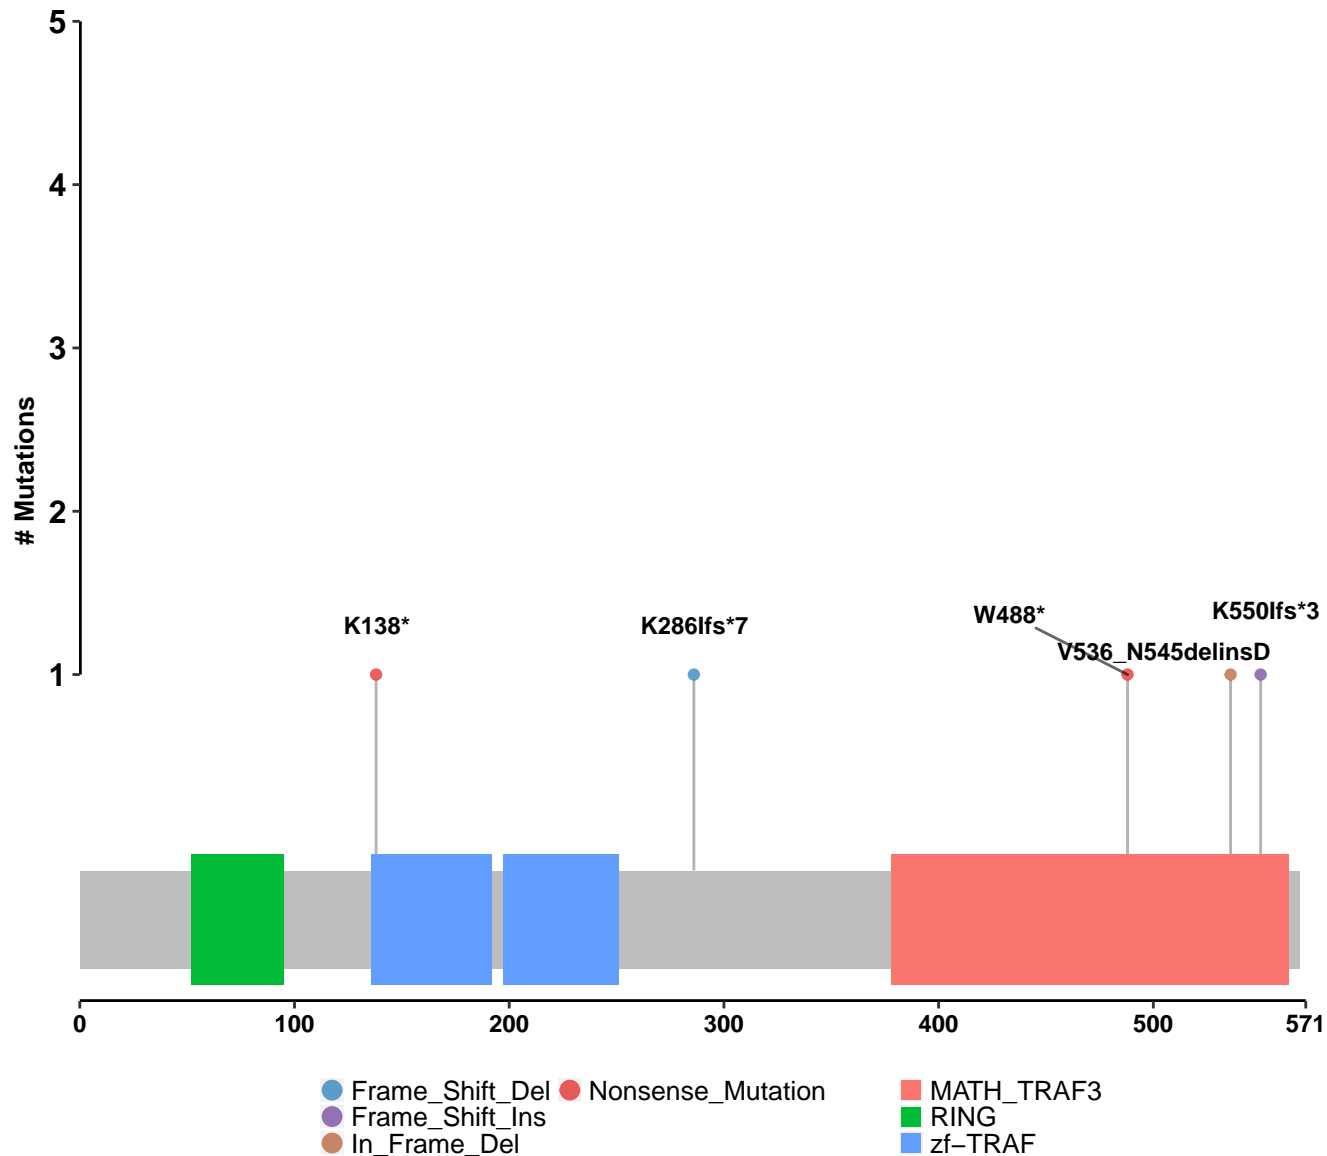

# CYLD: [Somatic Mutation Rate: 9.09%]

NM\_015247

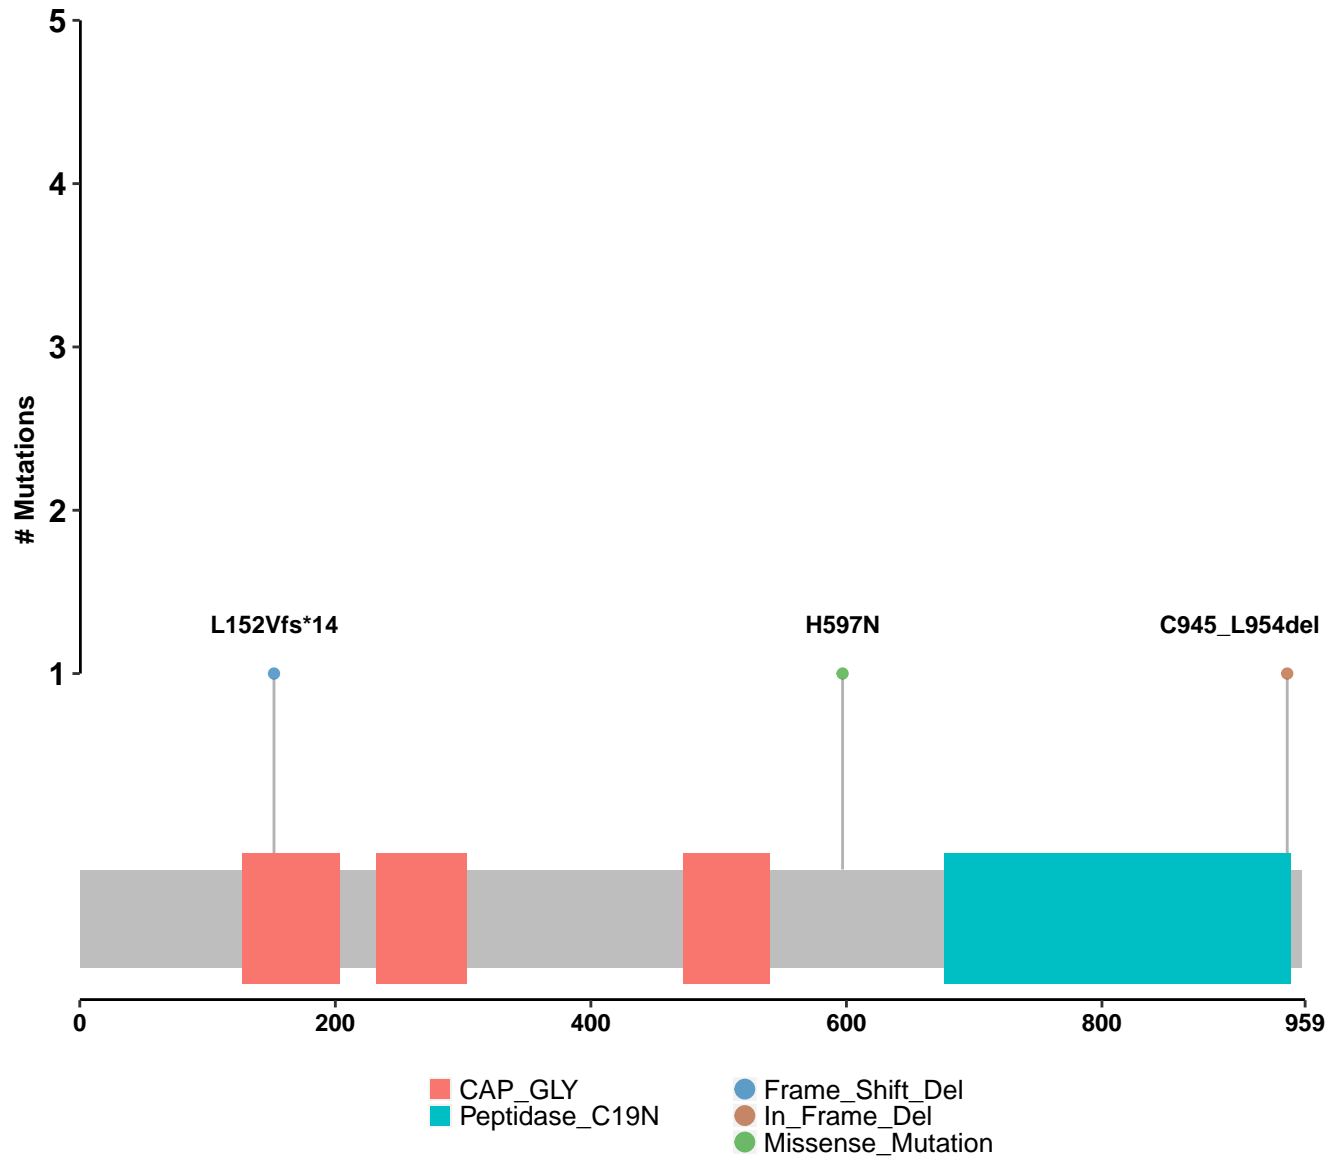

# TP53: [Somatic Mutation Rate: 54.55%]

NM\_000546

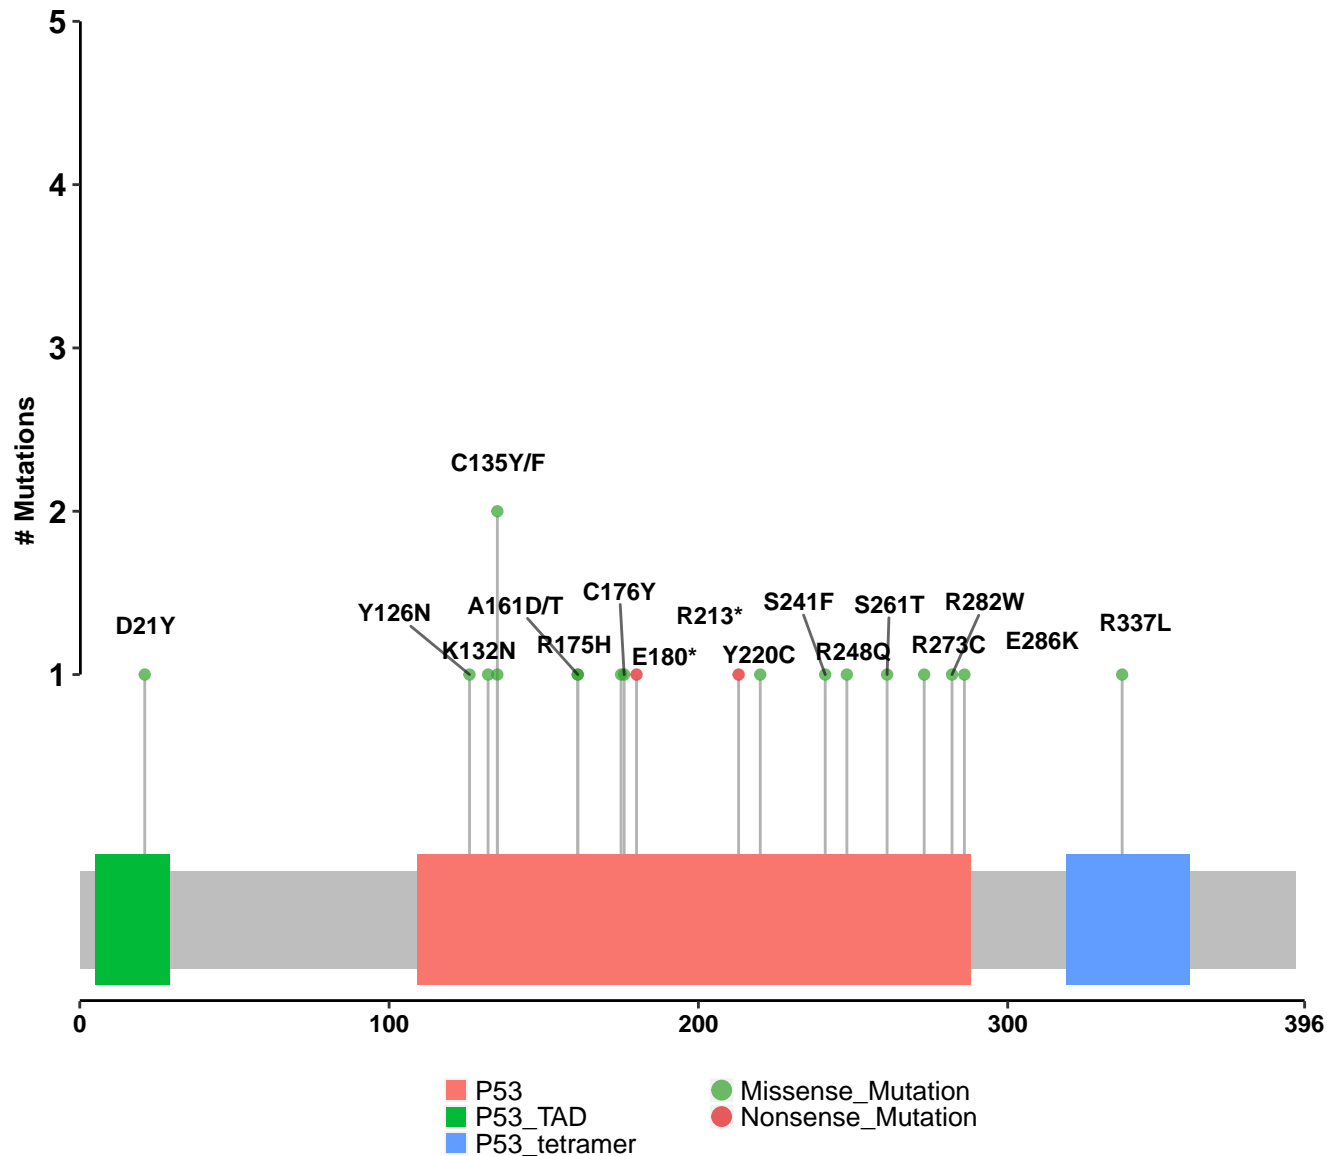



# FANCD2: [Somatic Mutation Rate: 9.09%]

NM\_033084

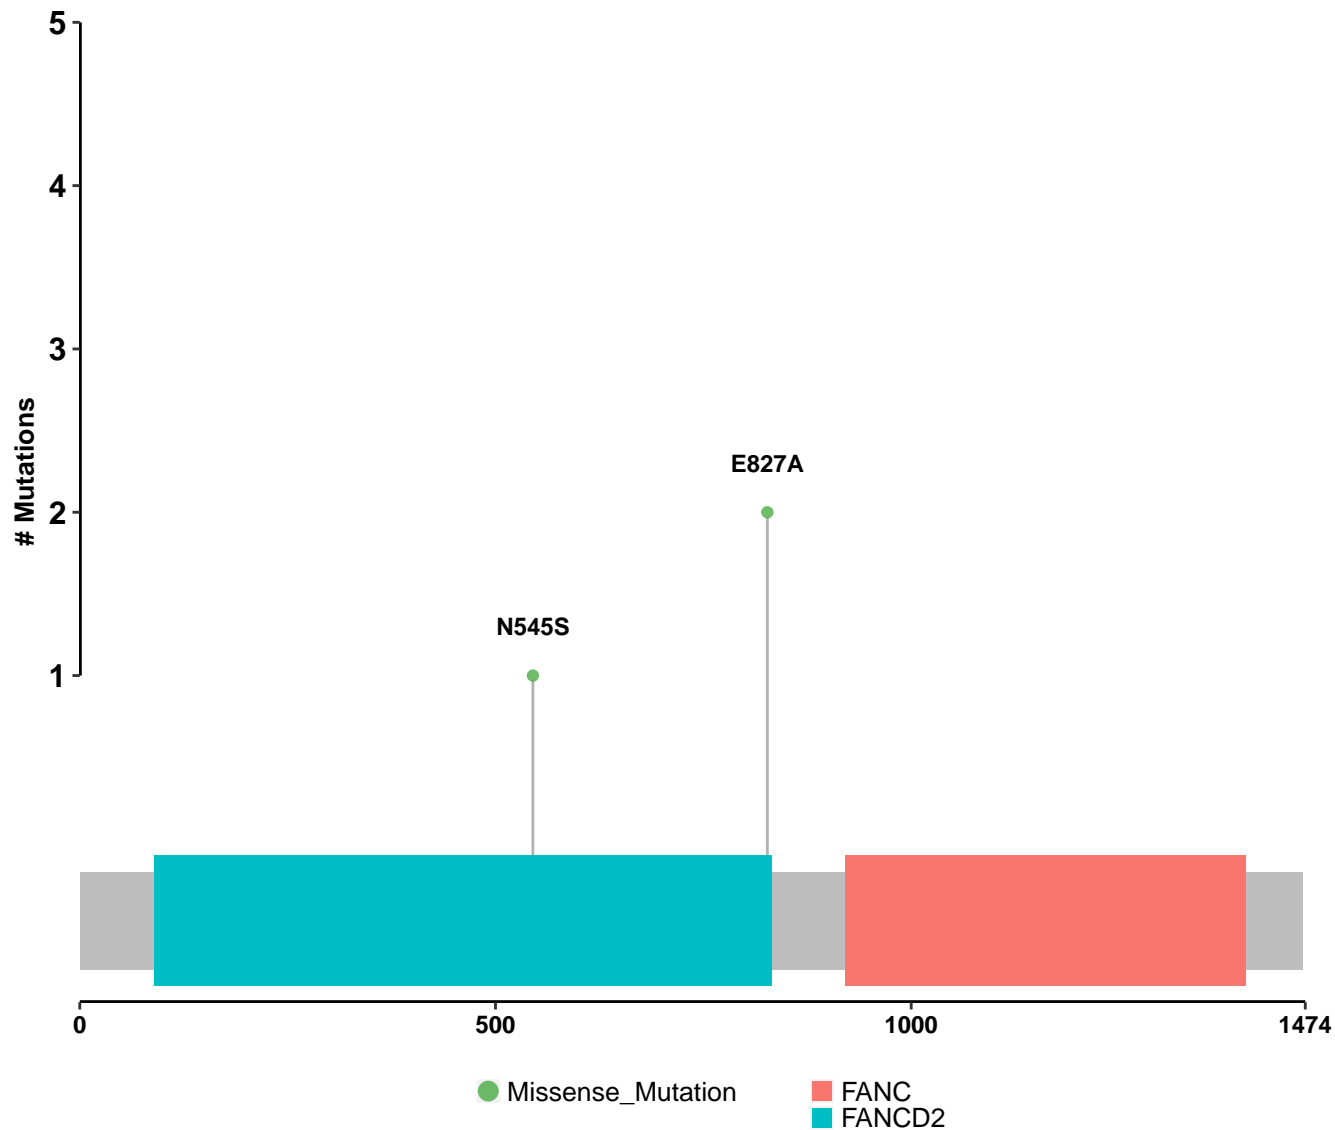

# LTB: [Somatic Mutation Rate: 9.09%]

NM\_002341

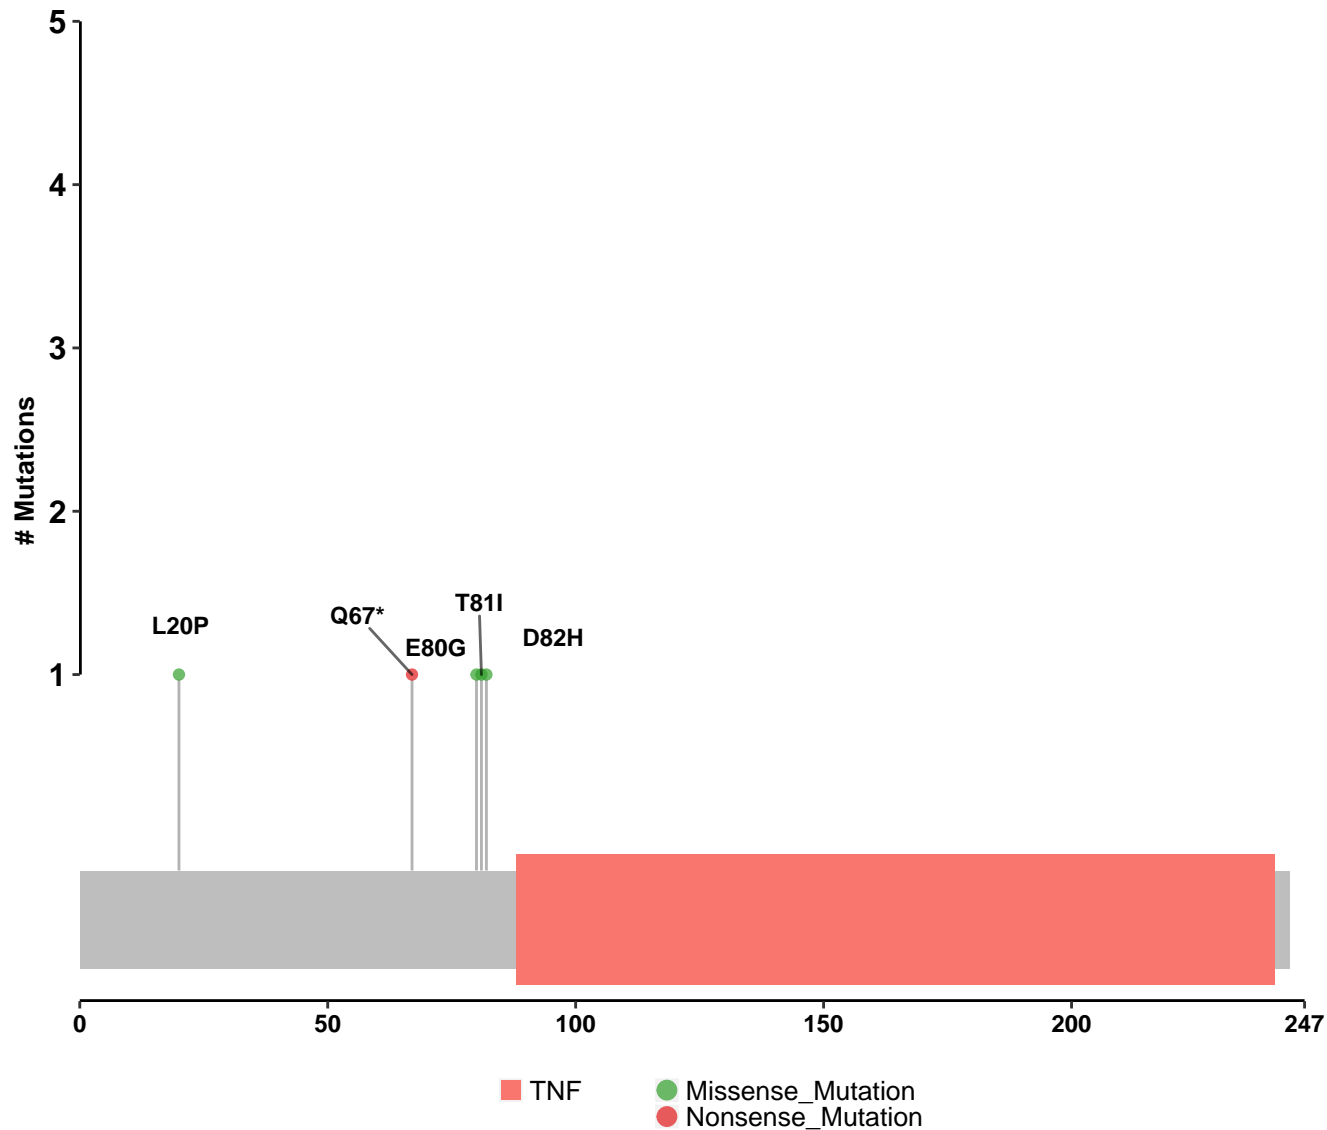

# TLR2: [Somatic Mutation Rate: 9.09%]

NM\_003264

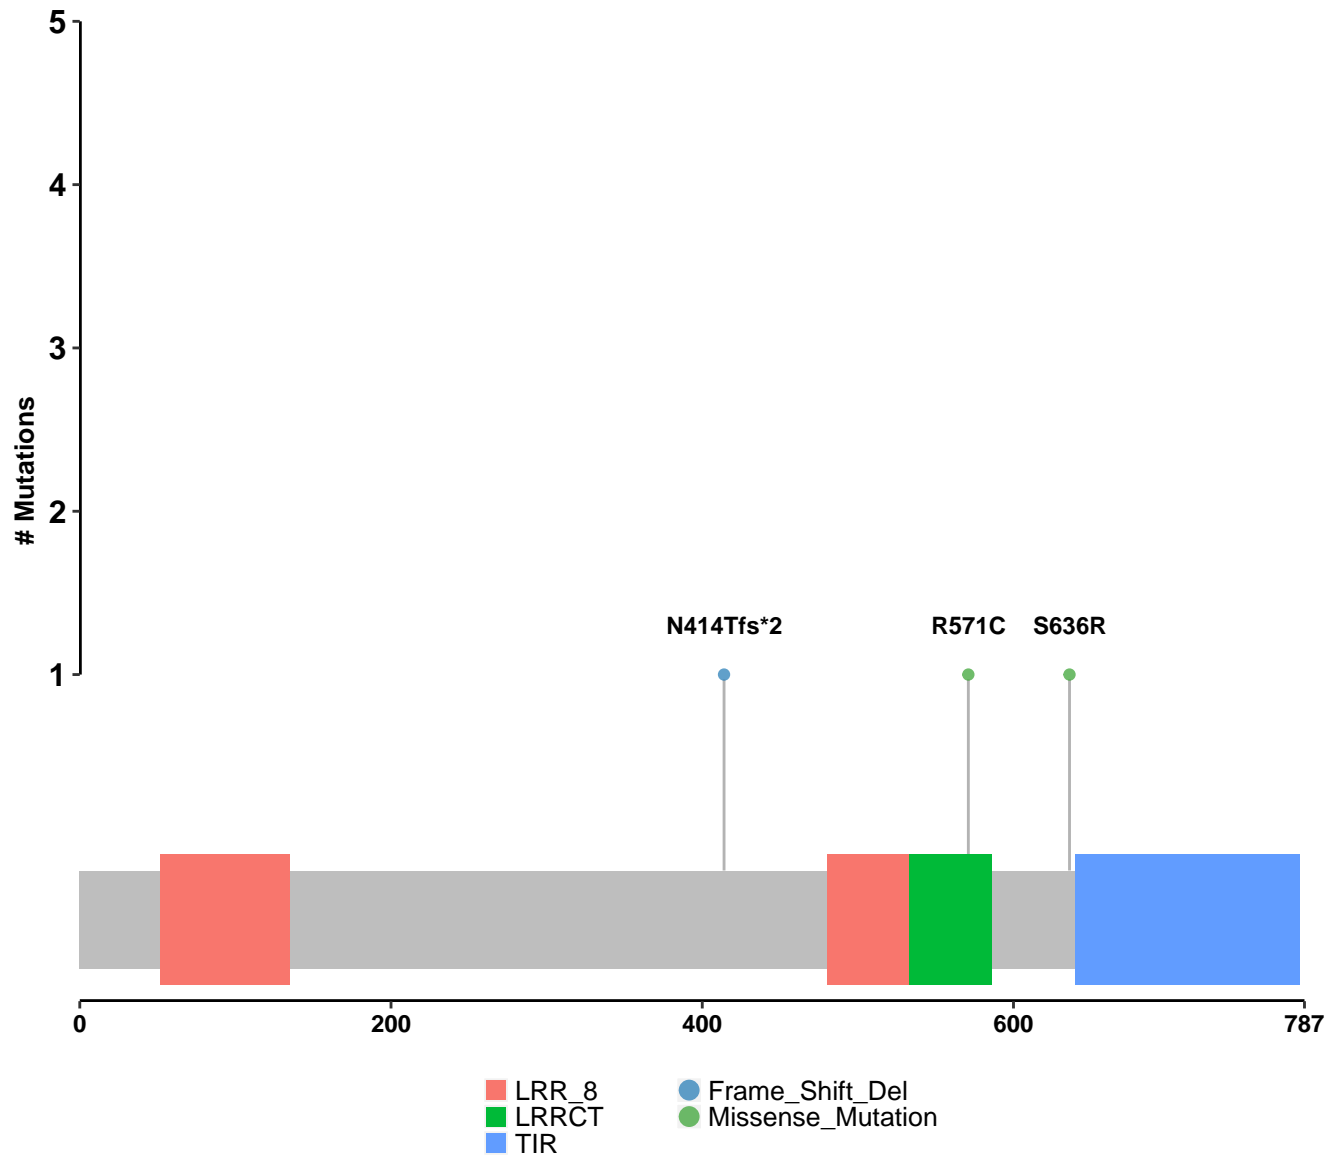

# TRADD: [Somatic Mutation Rate: 9.09%]

NM\_003789

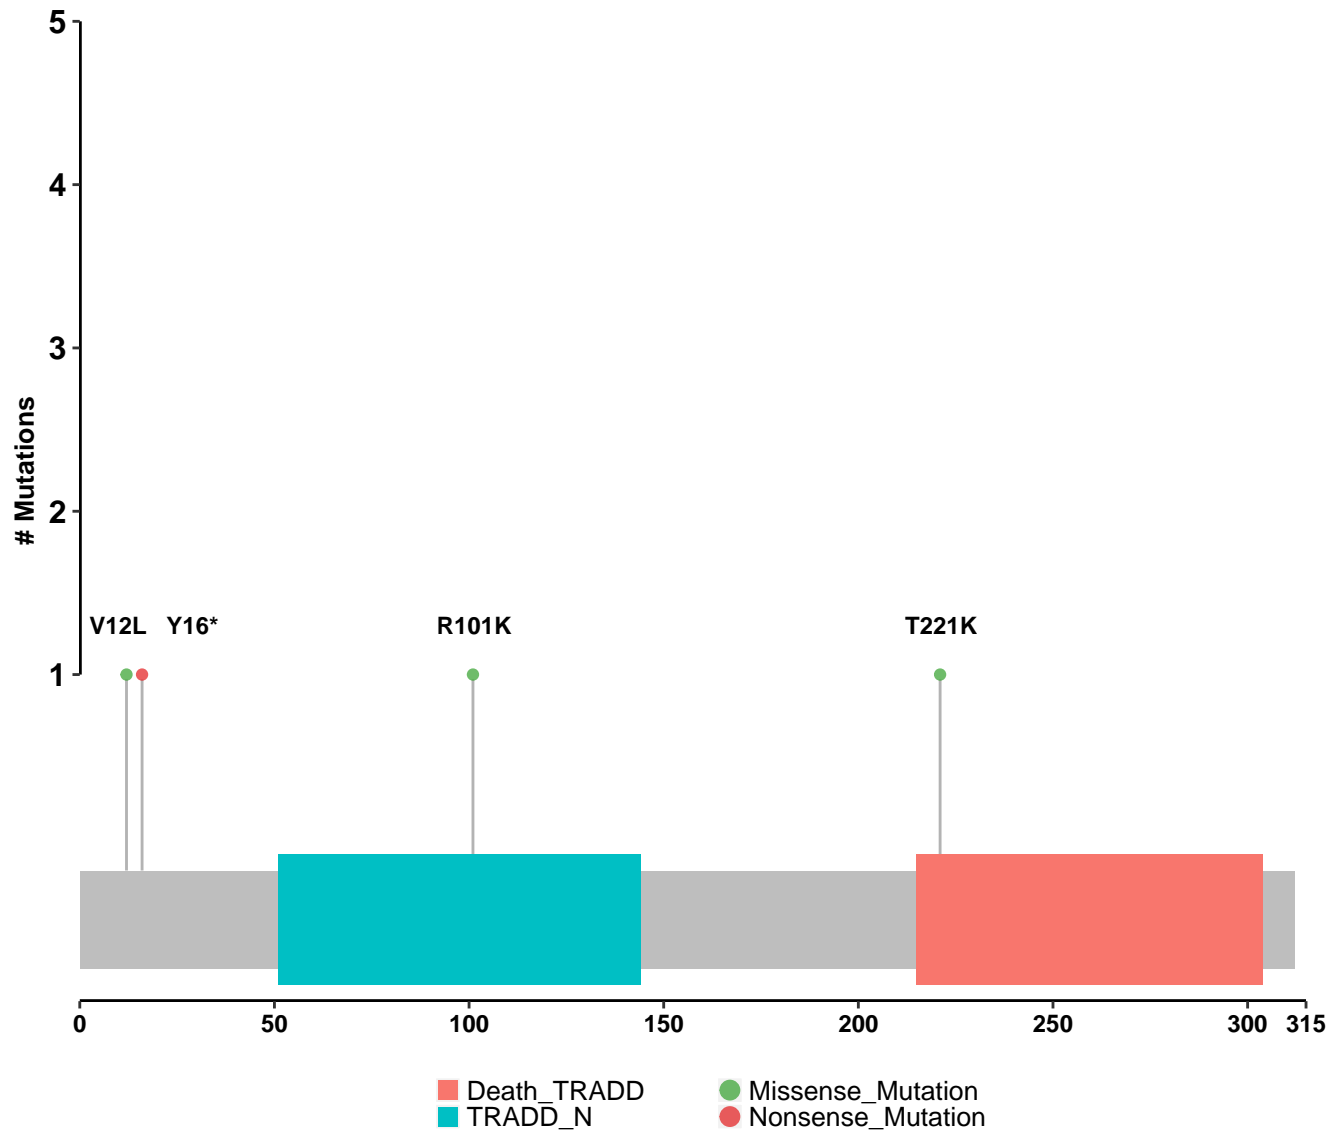

# USP1: [Somatic Mutation Rate: 6.06%]

NM\_003368

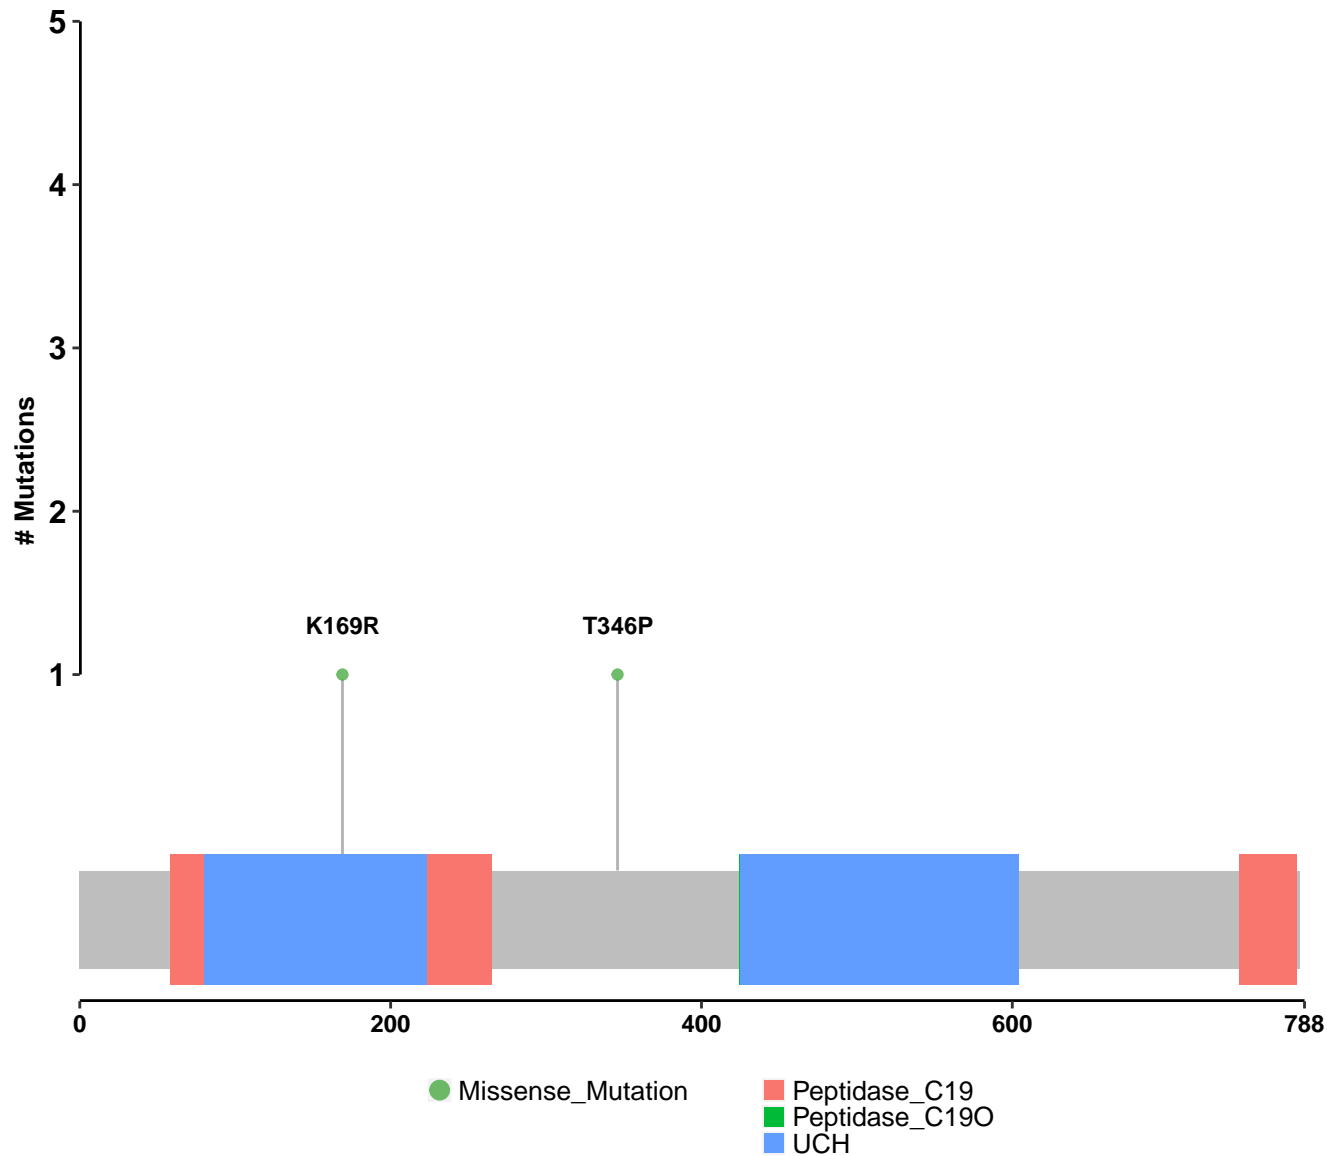

# WVOX: [Somatic Mutation Rate: 6.06%]

NM\_016373

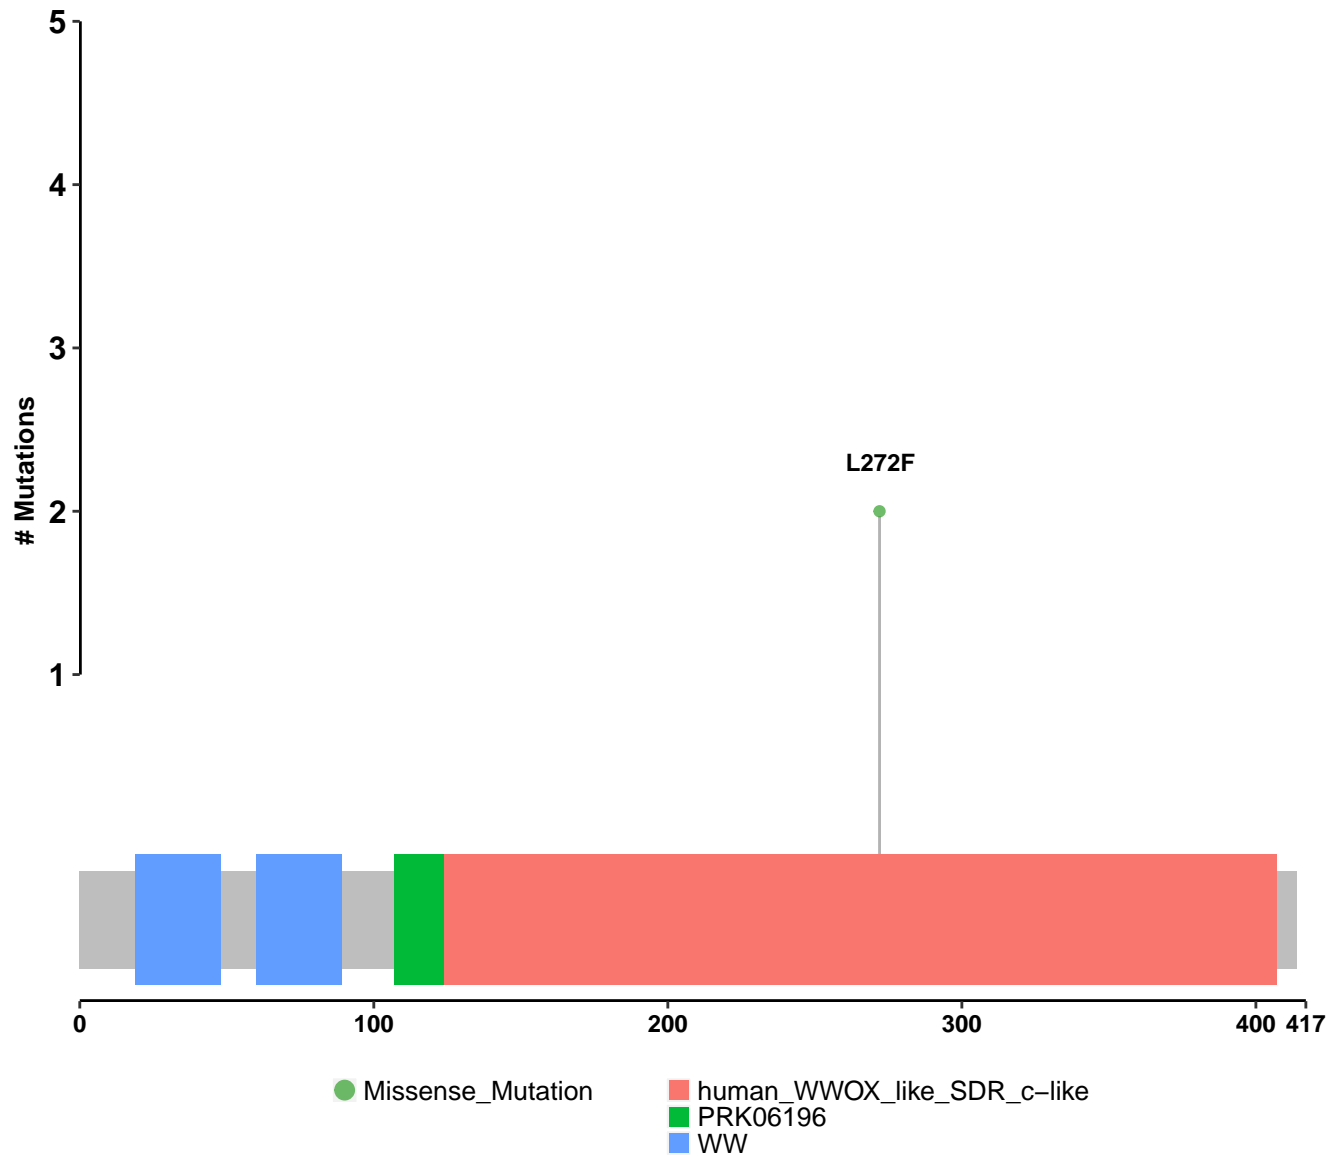

**BAX: [Somatic Mutation Rate: 6.06%]**

**NM\_004324**

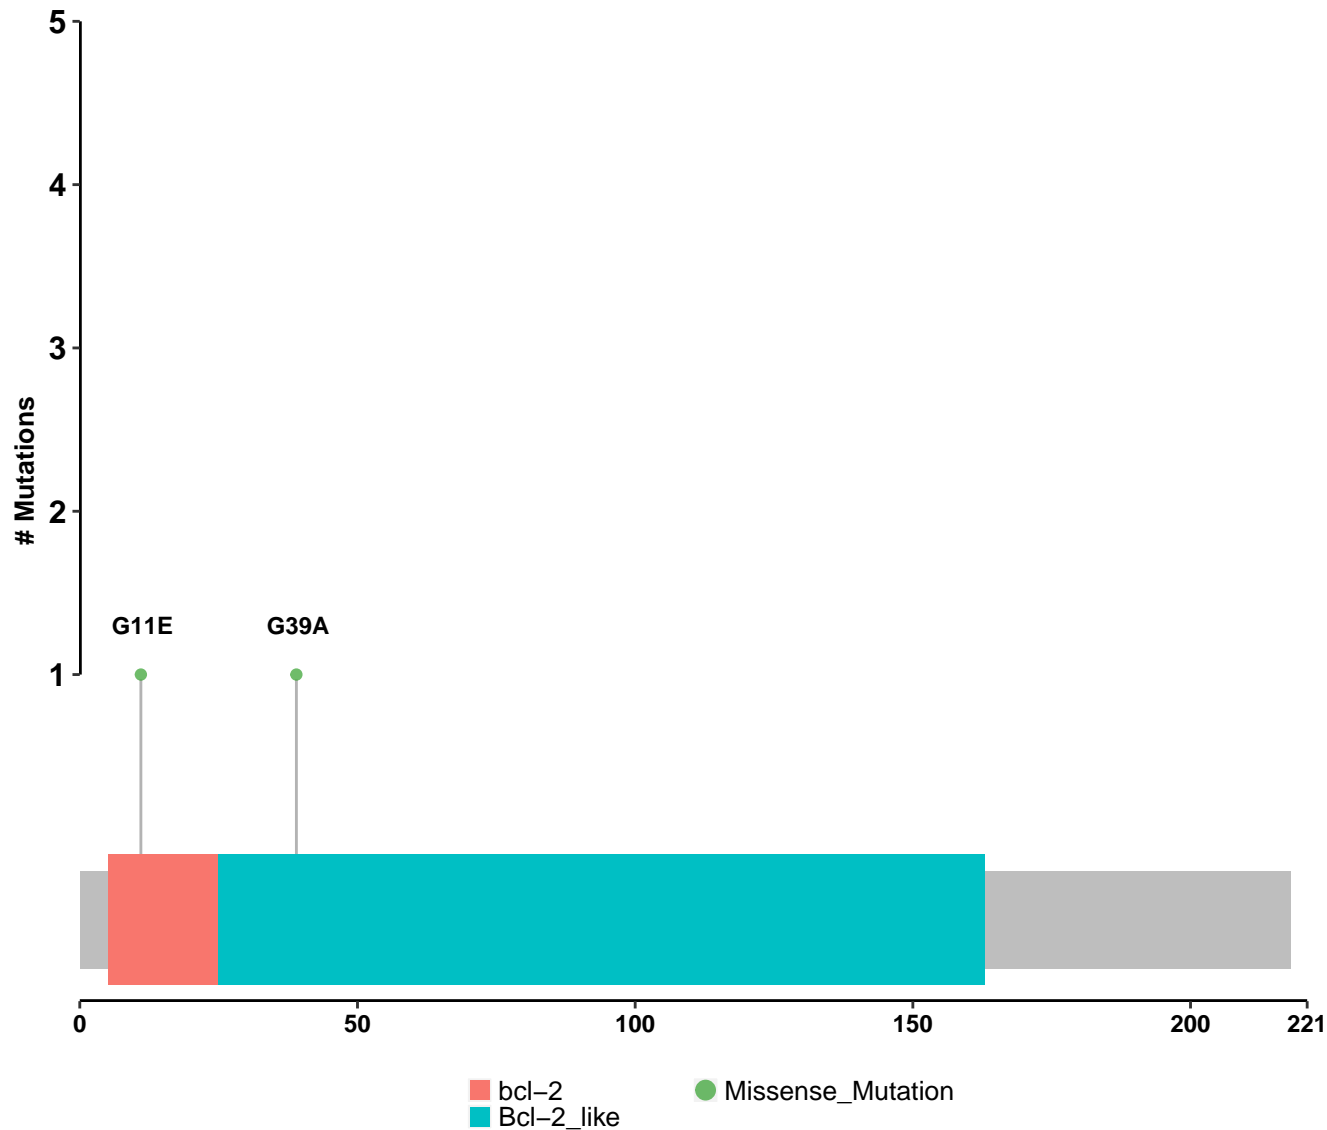

# BRCA1: [Somatic Mutation Rate: 3.03%]

NM\_007300

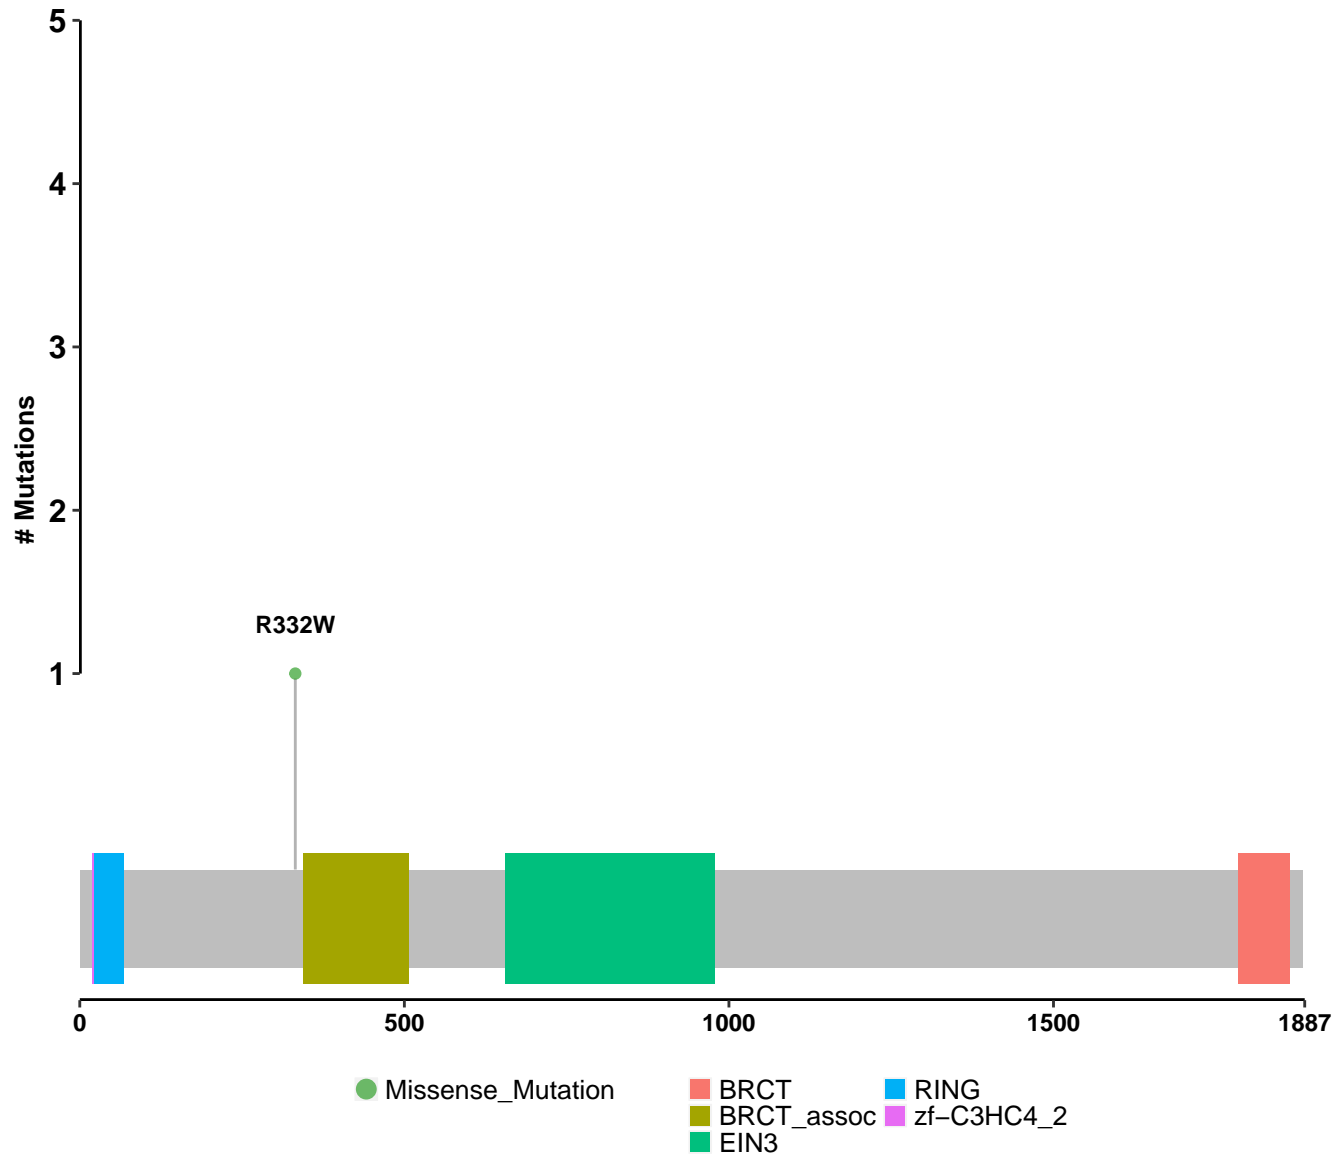



# CASP8: [Somatic Mutation Rate: 6.06%]

NM\_001080125

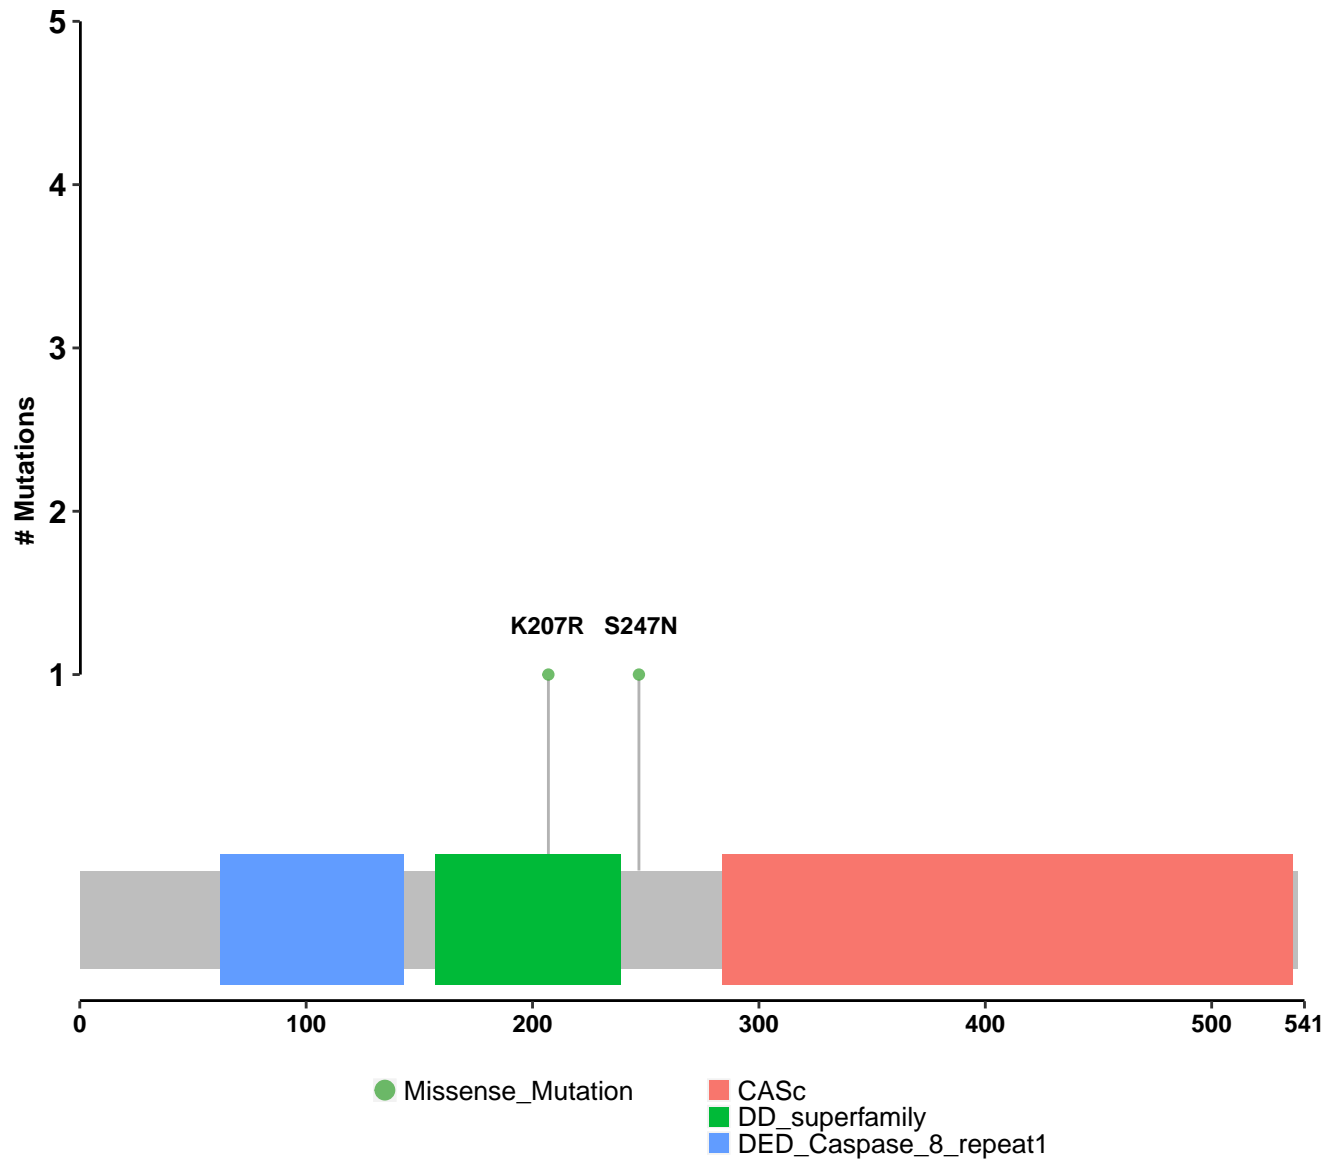

# CCND1: [Somatic Mutation Rate: 3.03%]

NM\_053056

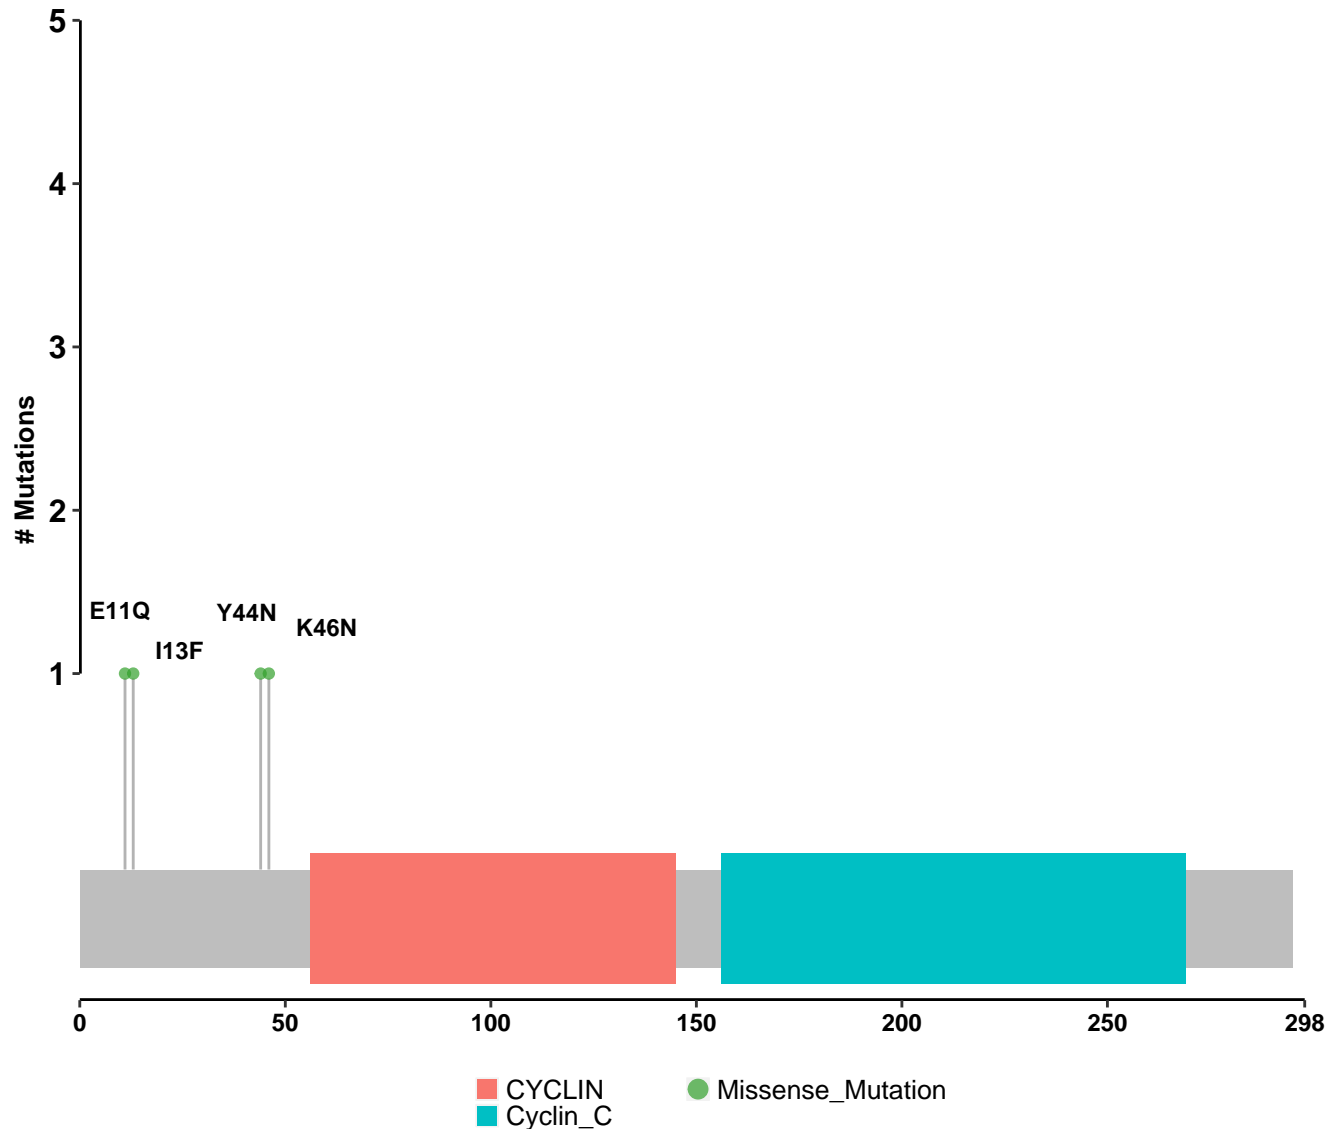

# NRAS: [Somatic Mutation Rate: 30.3%]

NM\_002524

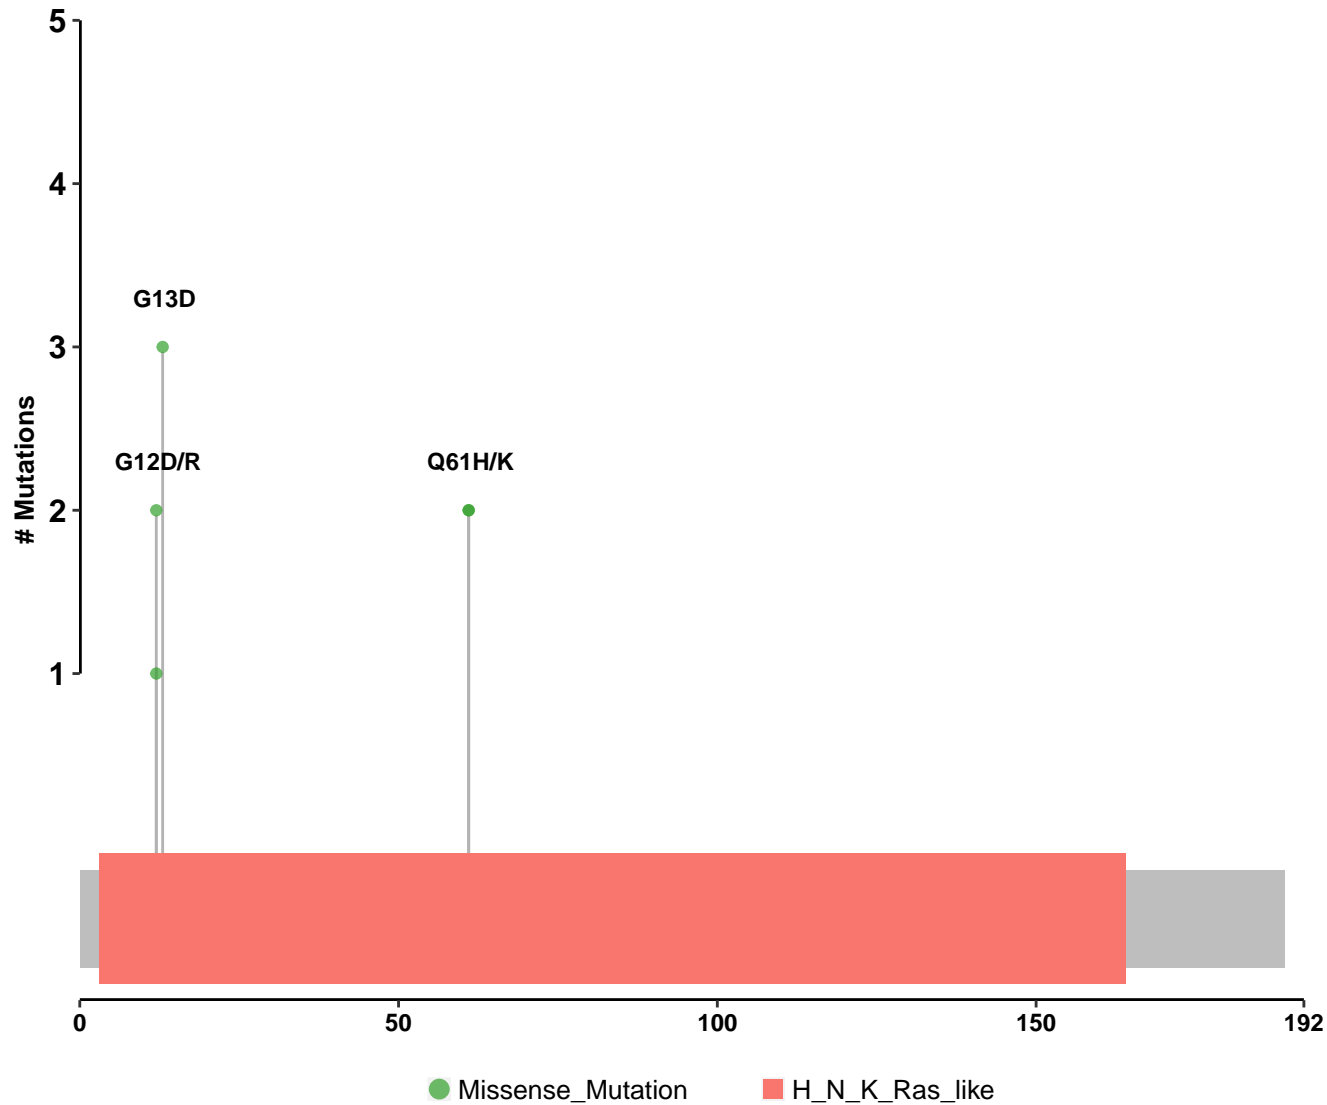

# CDKN1A: [Somatic Mutation Rate: 3.03%]

NM\_000389

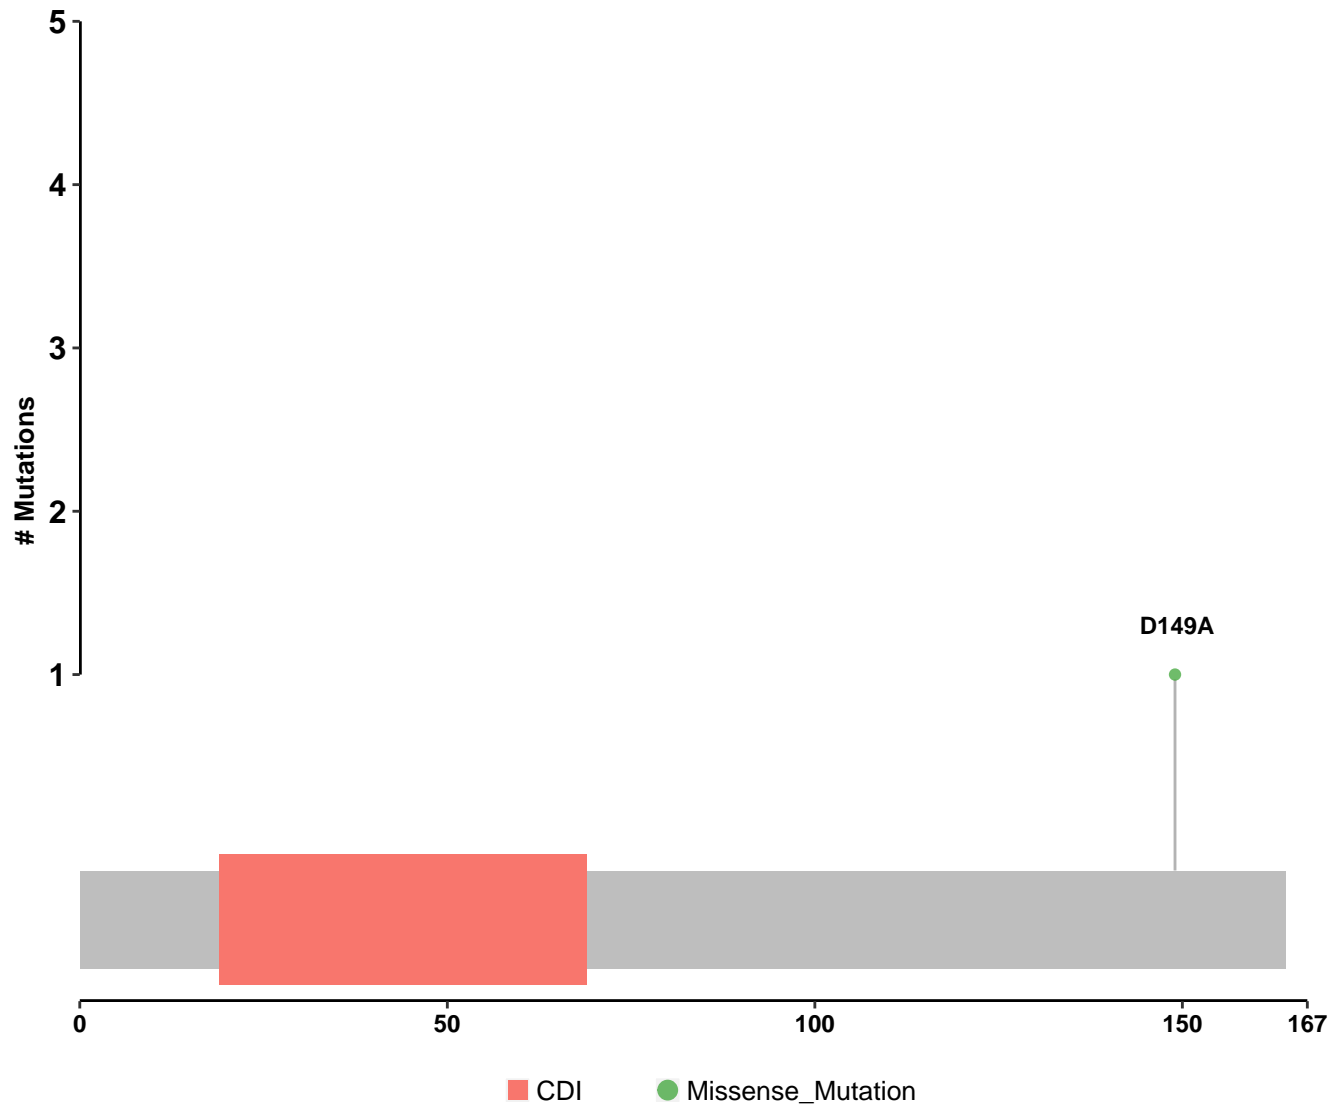

# FANCE: [Somatic Mutation Rate: 6.06%]

NM\_021922

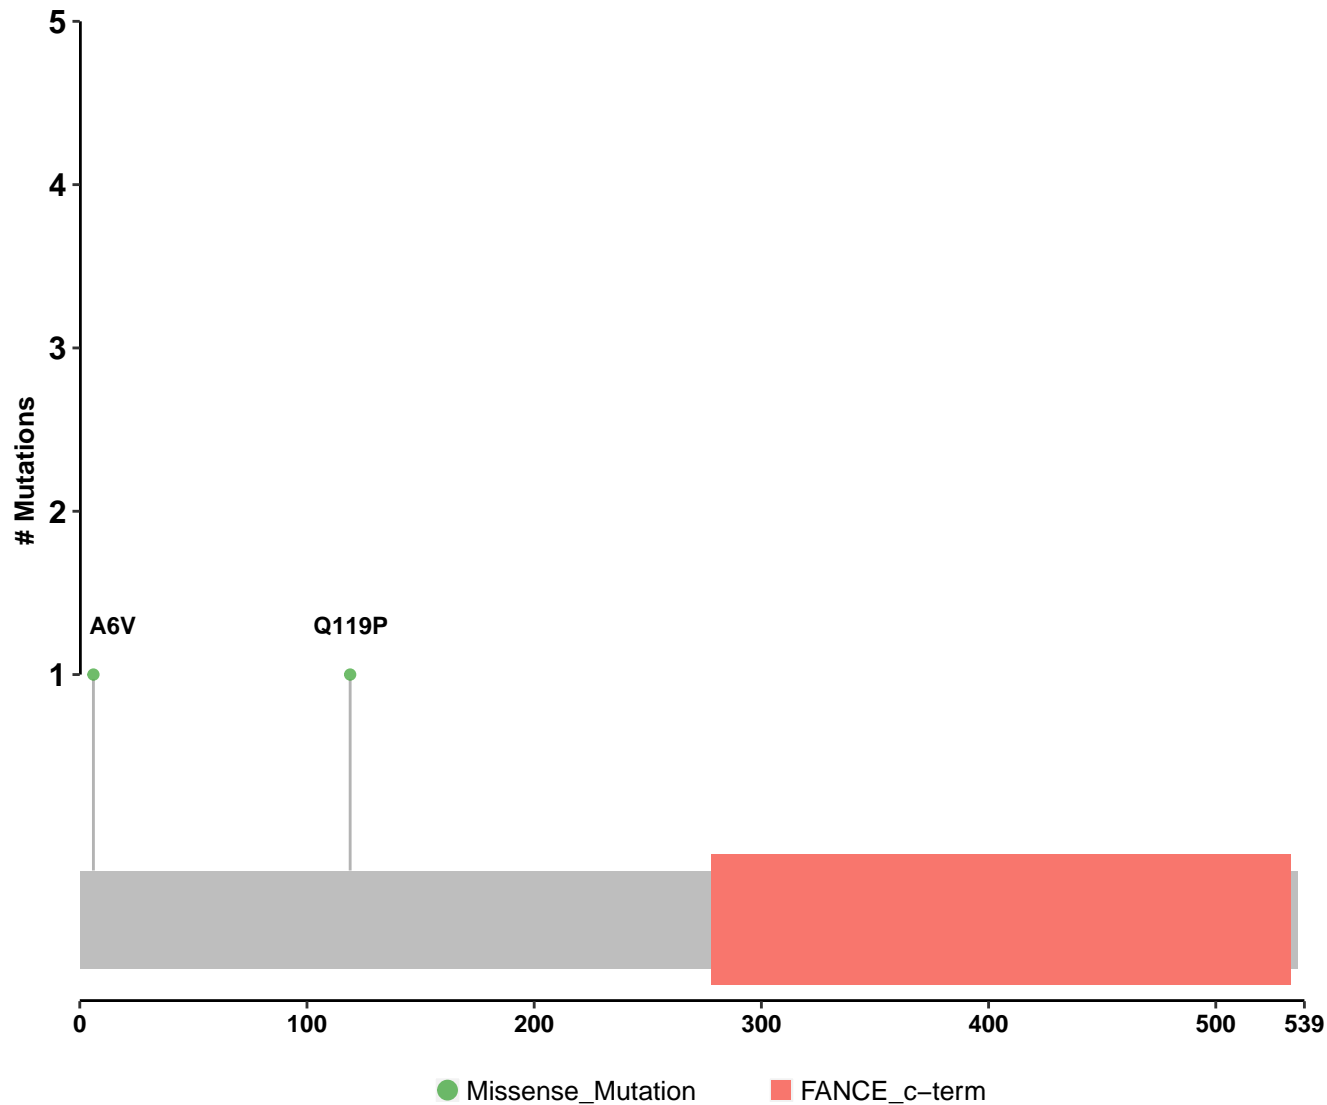

# FANCF: [Somatic Mutation Rate: 6.06%]

NM\_022725

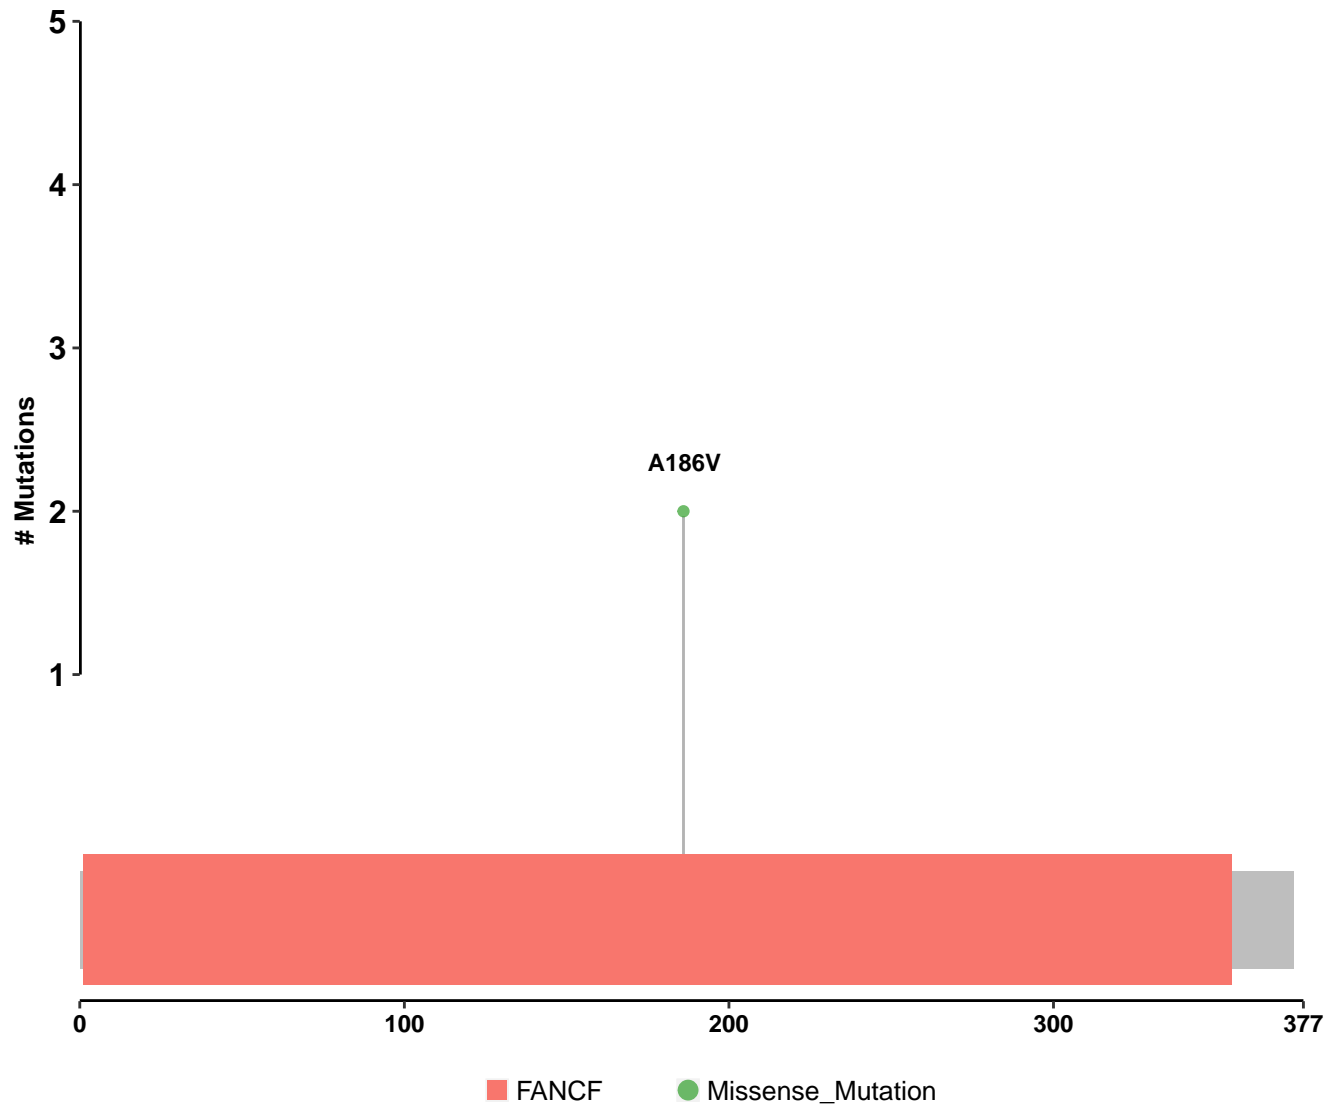

FANCG: [Somatic Mutation Rate: 6.06%]

NM\_004629

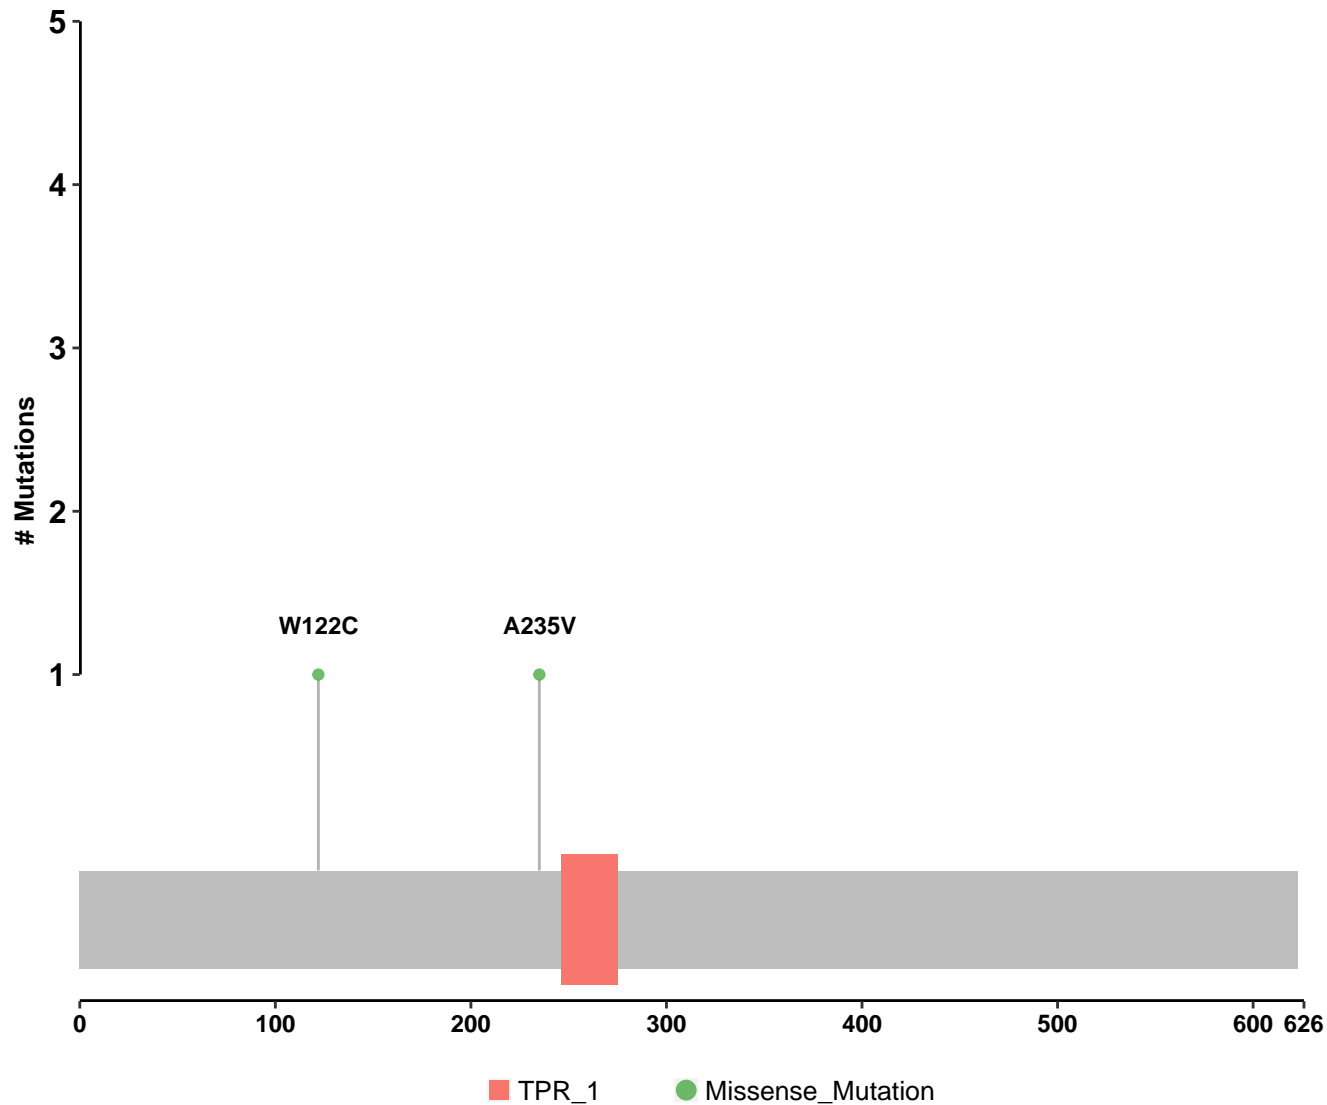

# IRF4: [Somatic Mutation Rate: 6.06%]

NM\_002460

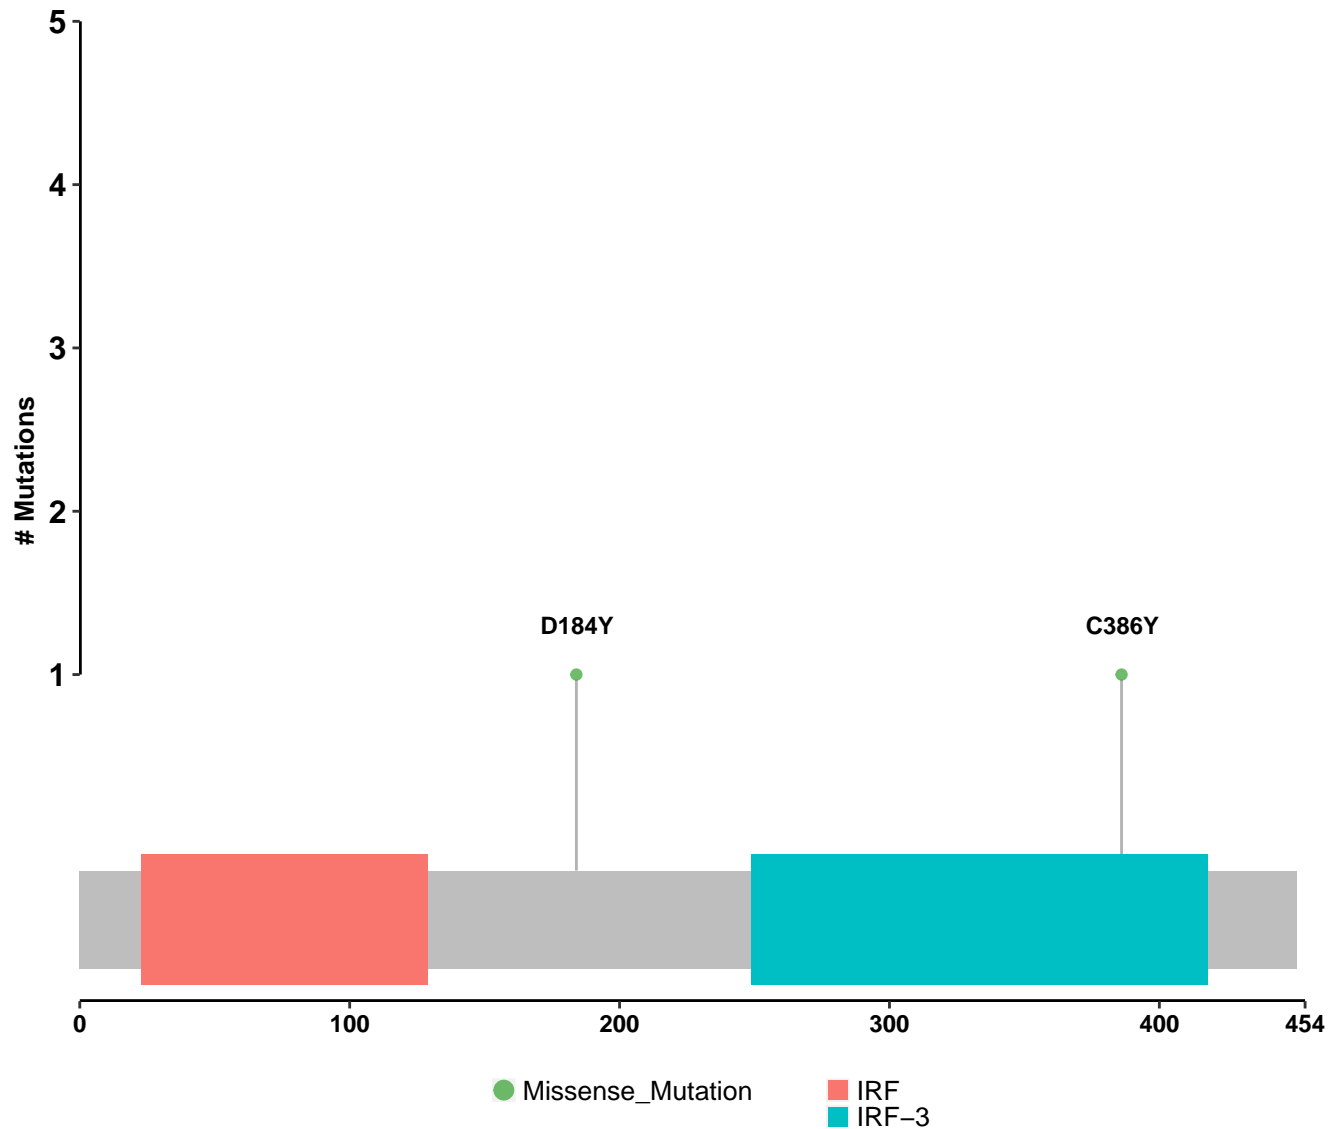



# MUS81: [Somatic Mutation Rate: 6.06%]

NM\_025128

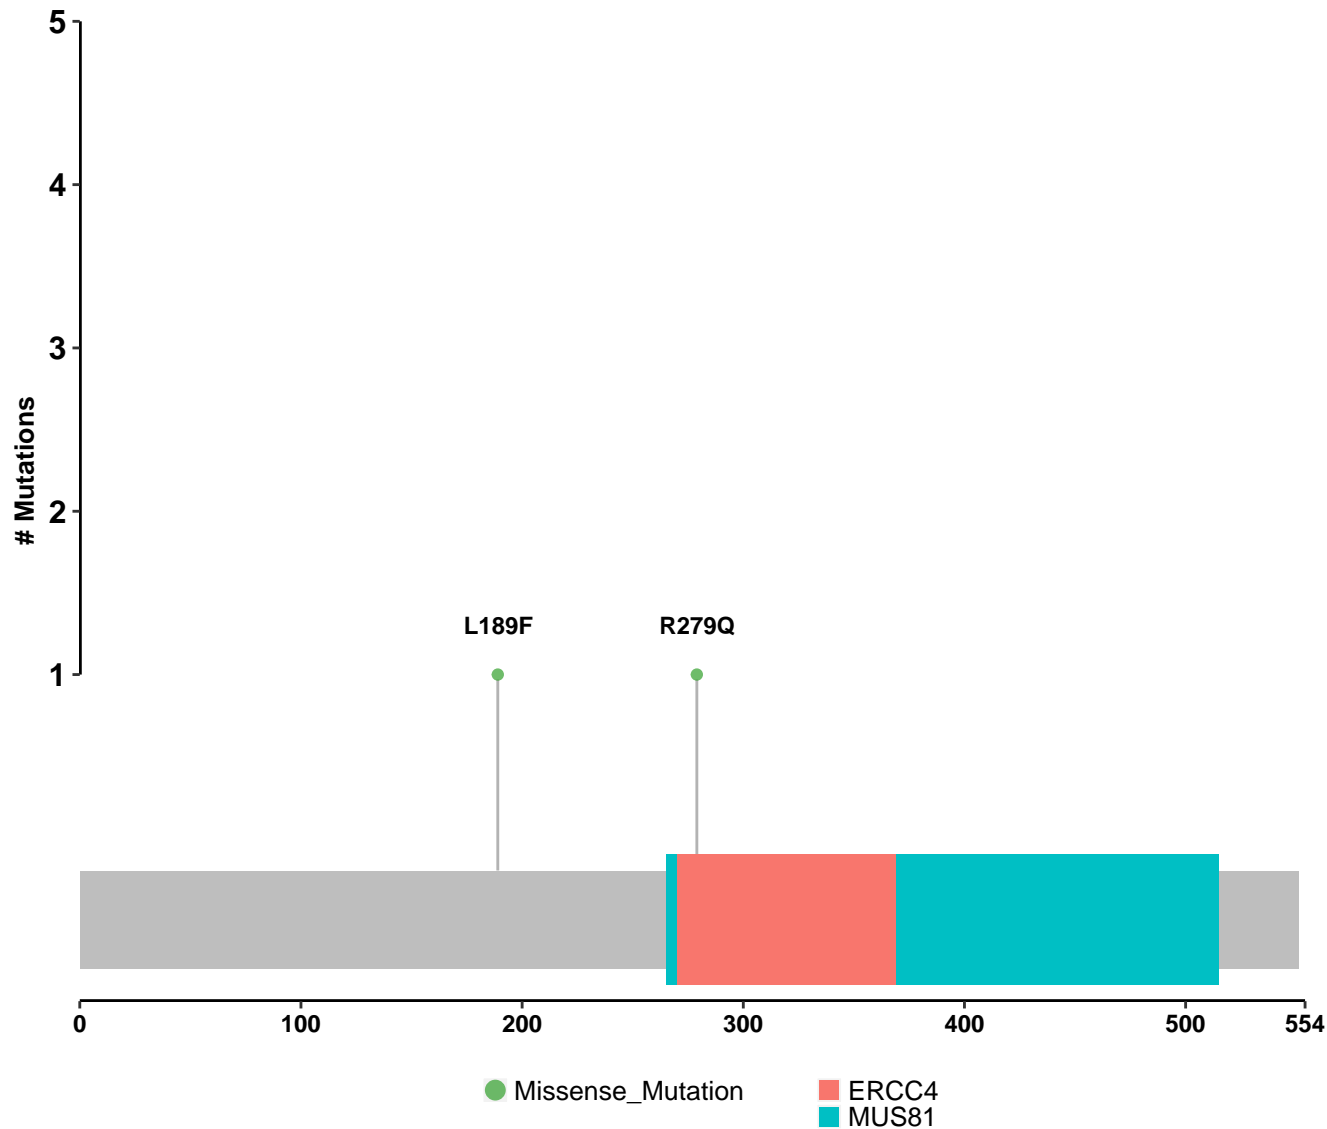

# POLN: [Somatic Mutation Rate: 3.03%]

NM\_181808

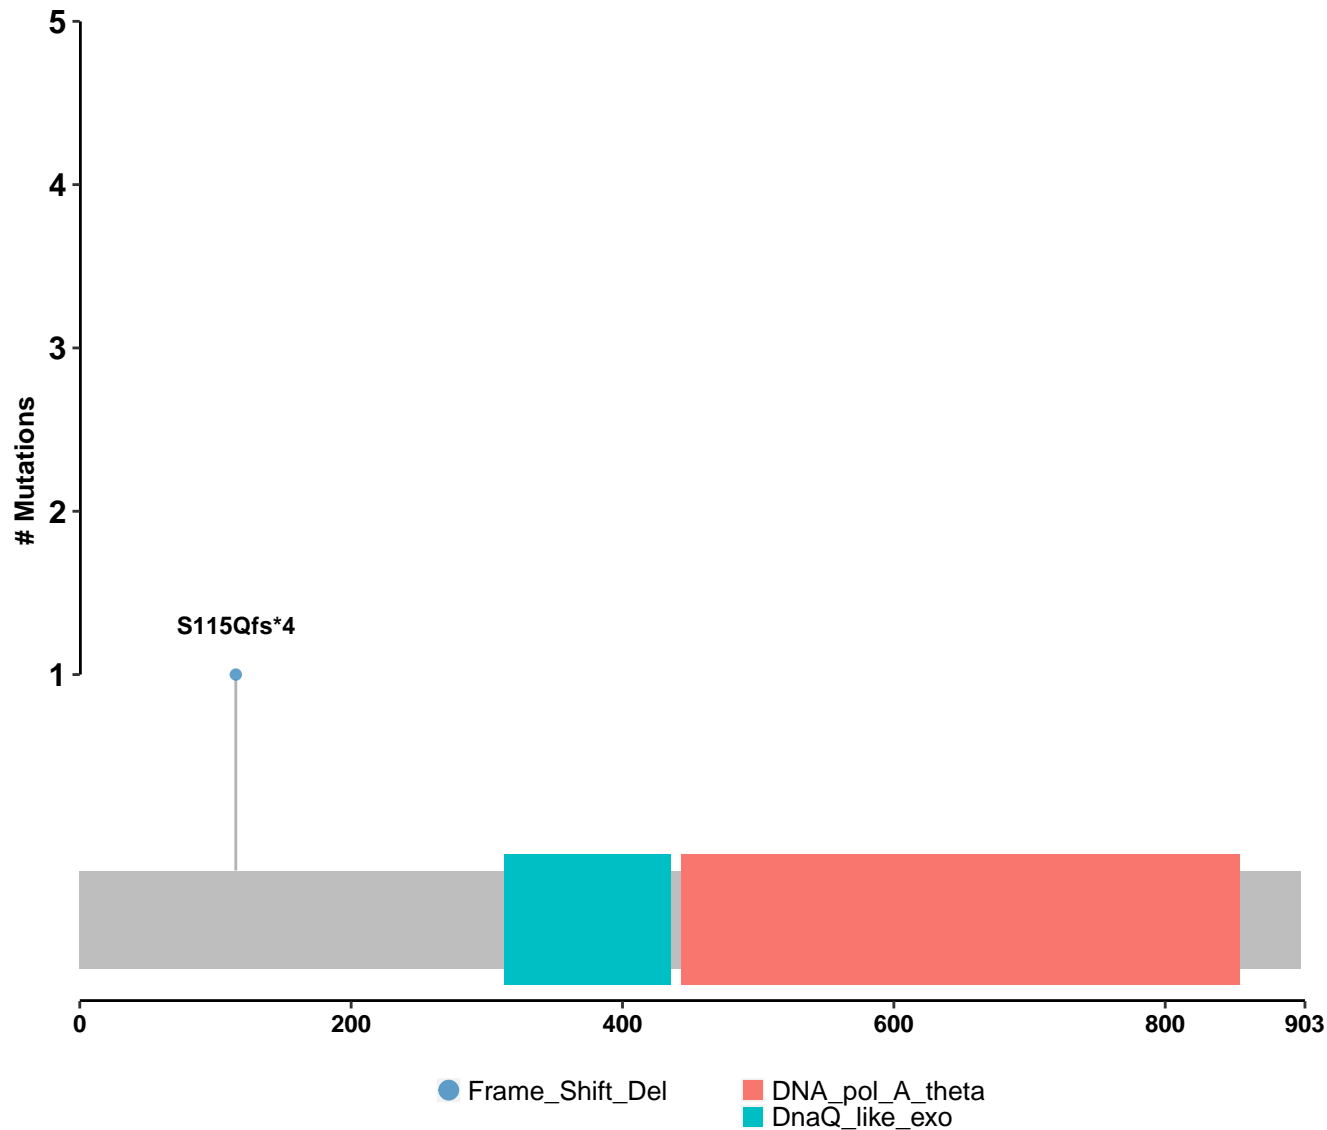

# RB1: [Somatic Mutation Rate: 6.06%]

NM\_000321

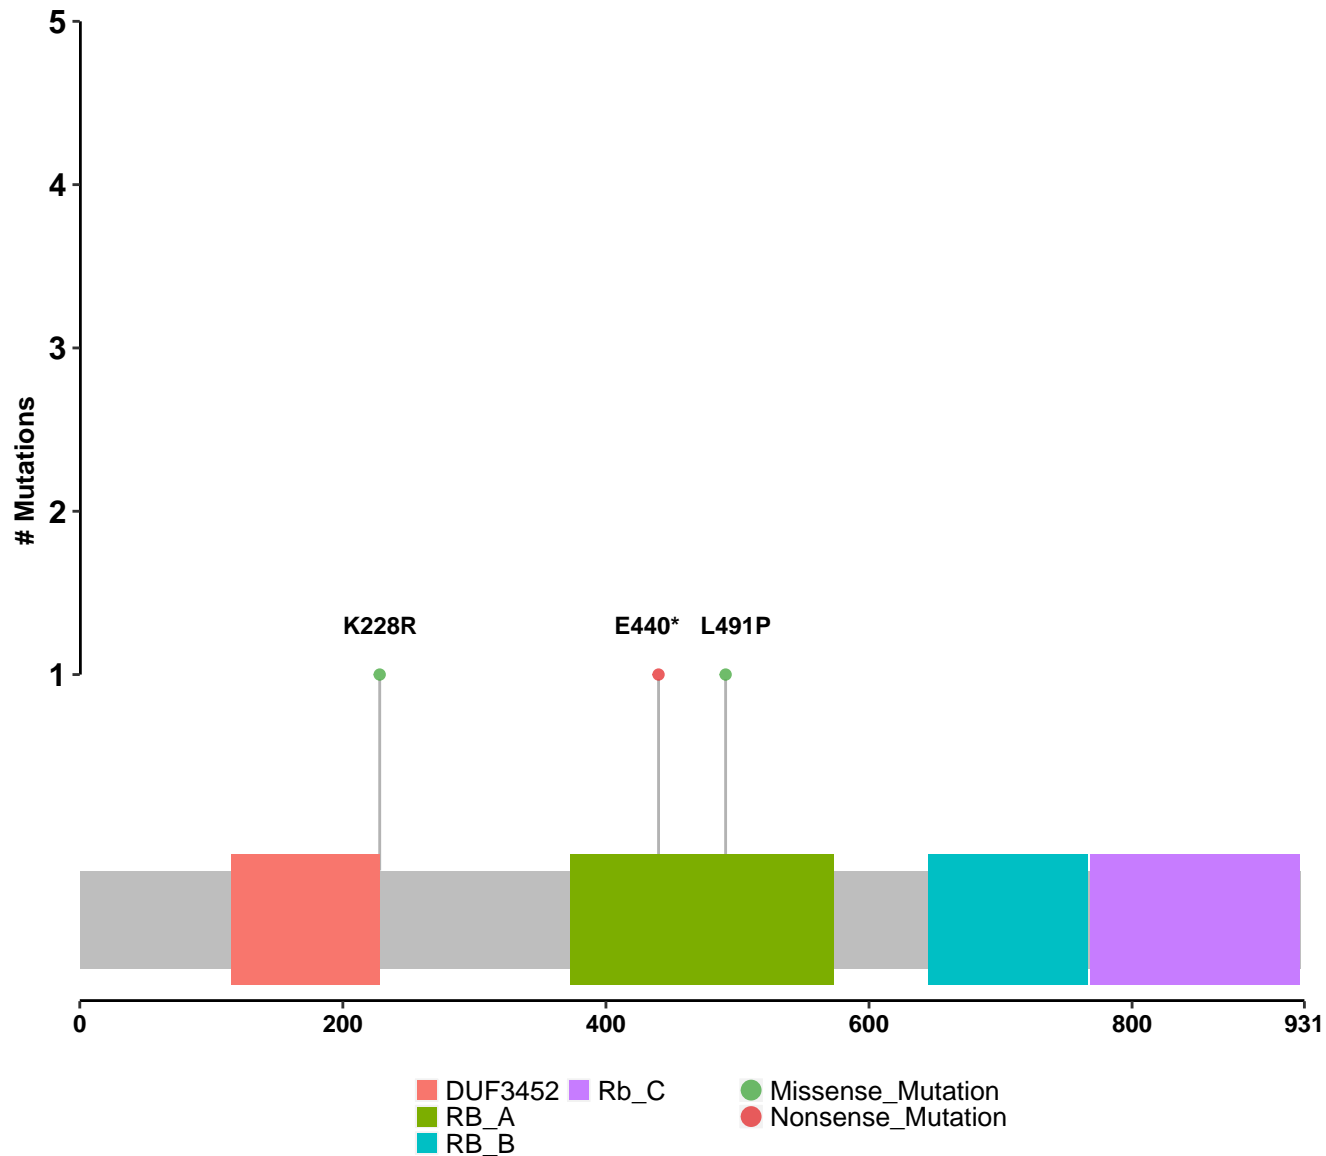

RELA: [Somatic Mutation Rate: 6.06%]

NM\_021975

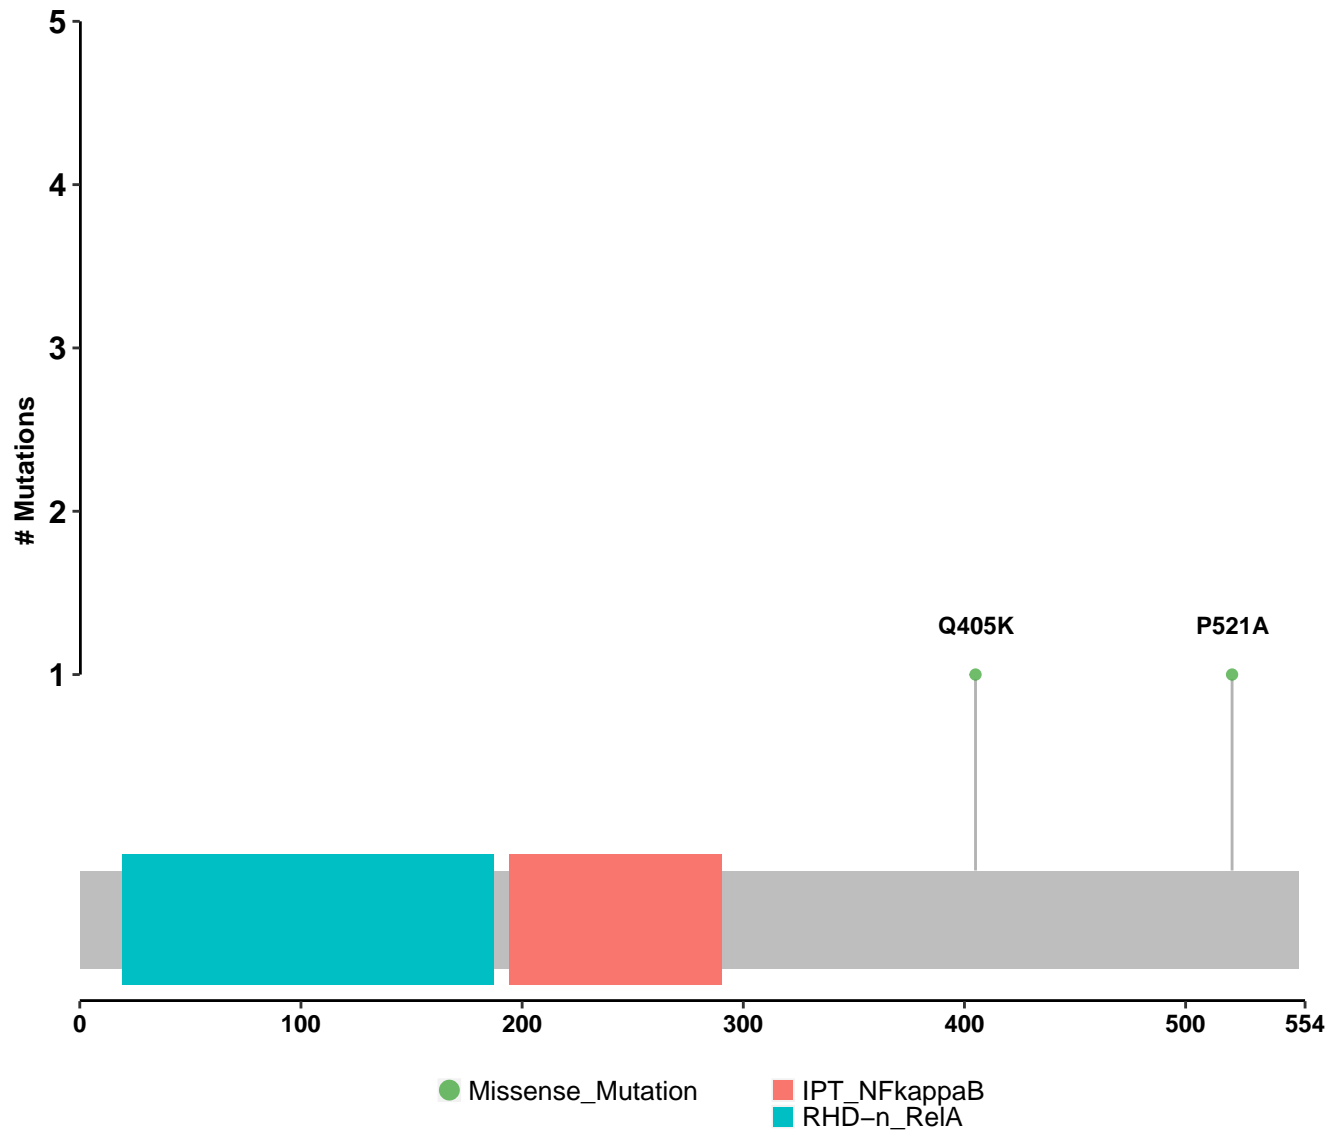

TLR1: [Somatic Mutation Rate: 3.03%]

NM\_003263

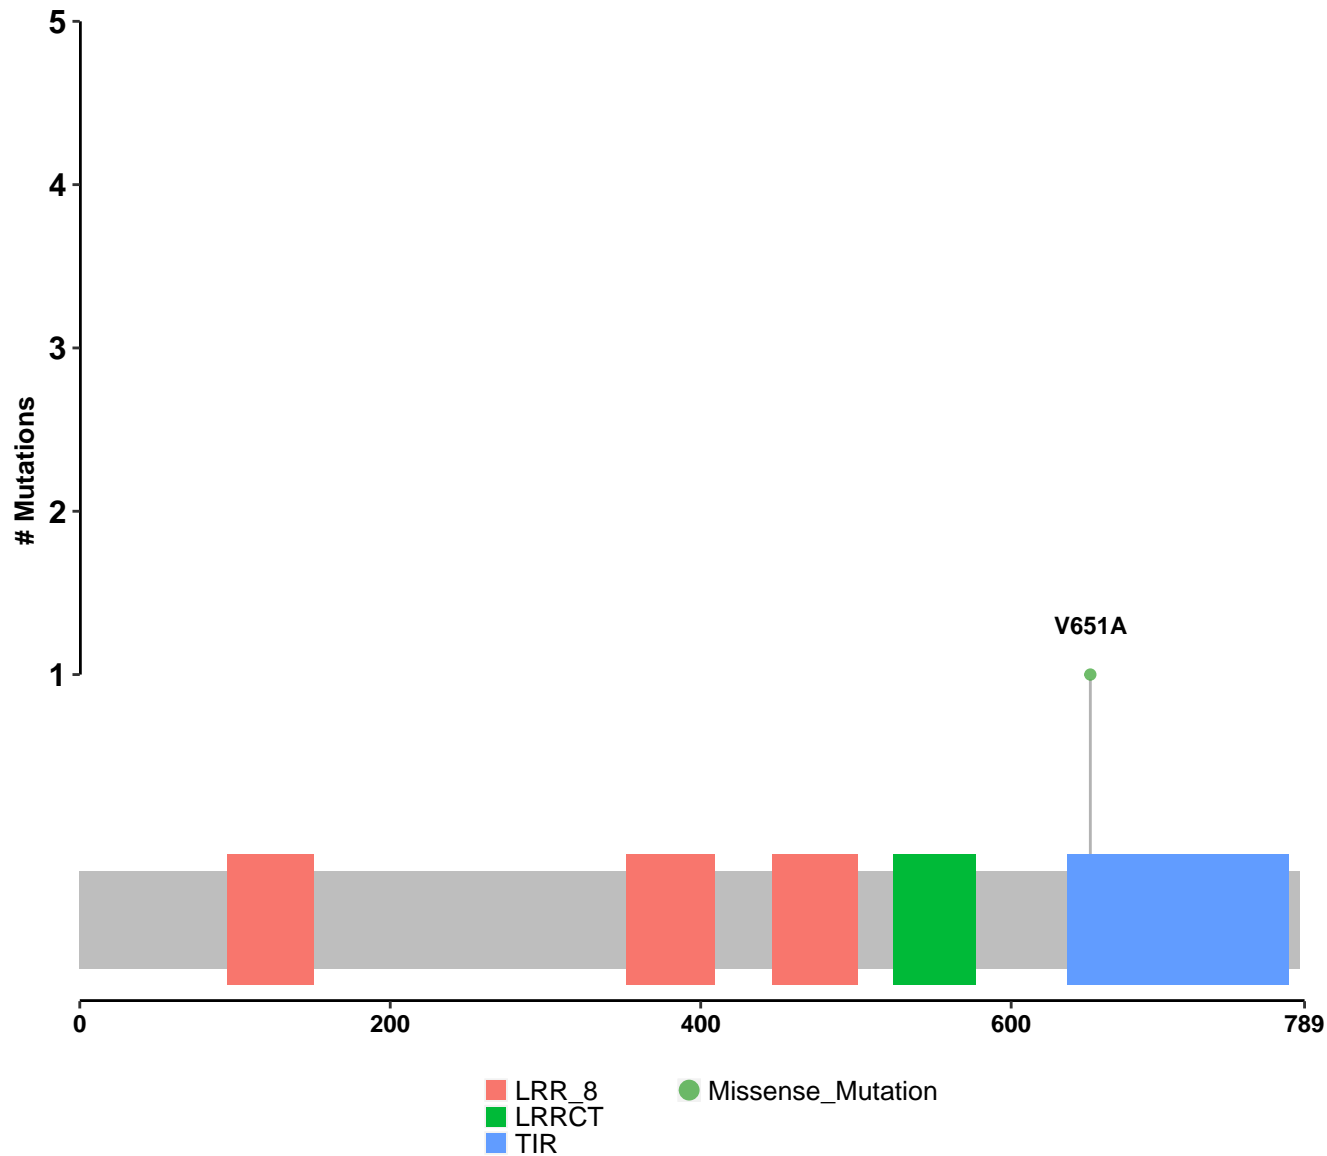

# BRCA2: [Somatic Mutation Rate: 9.09%]

NM\_000059

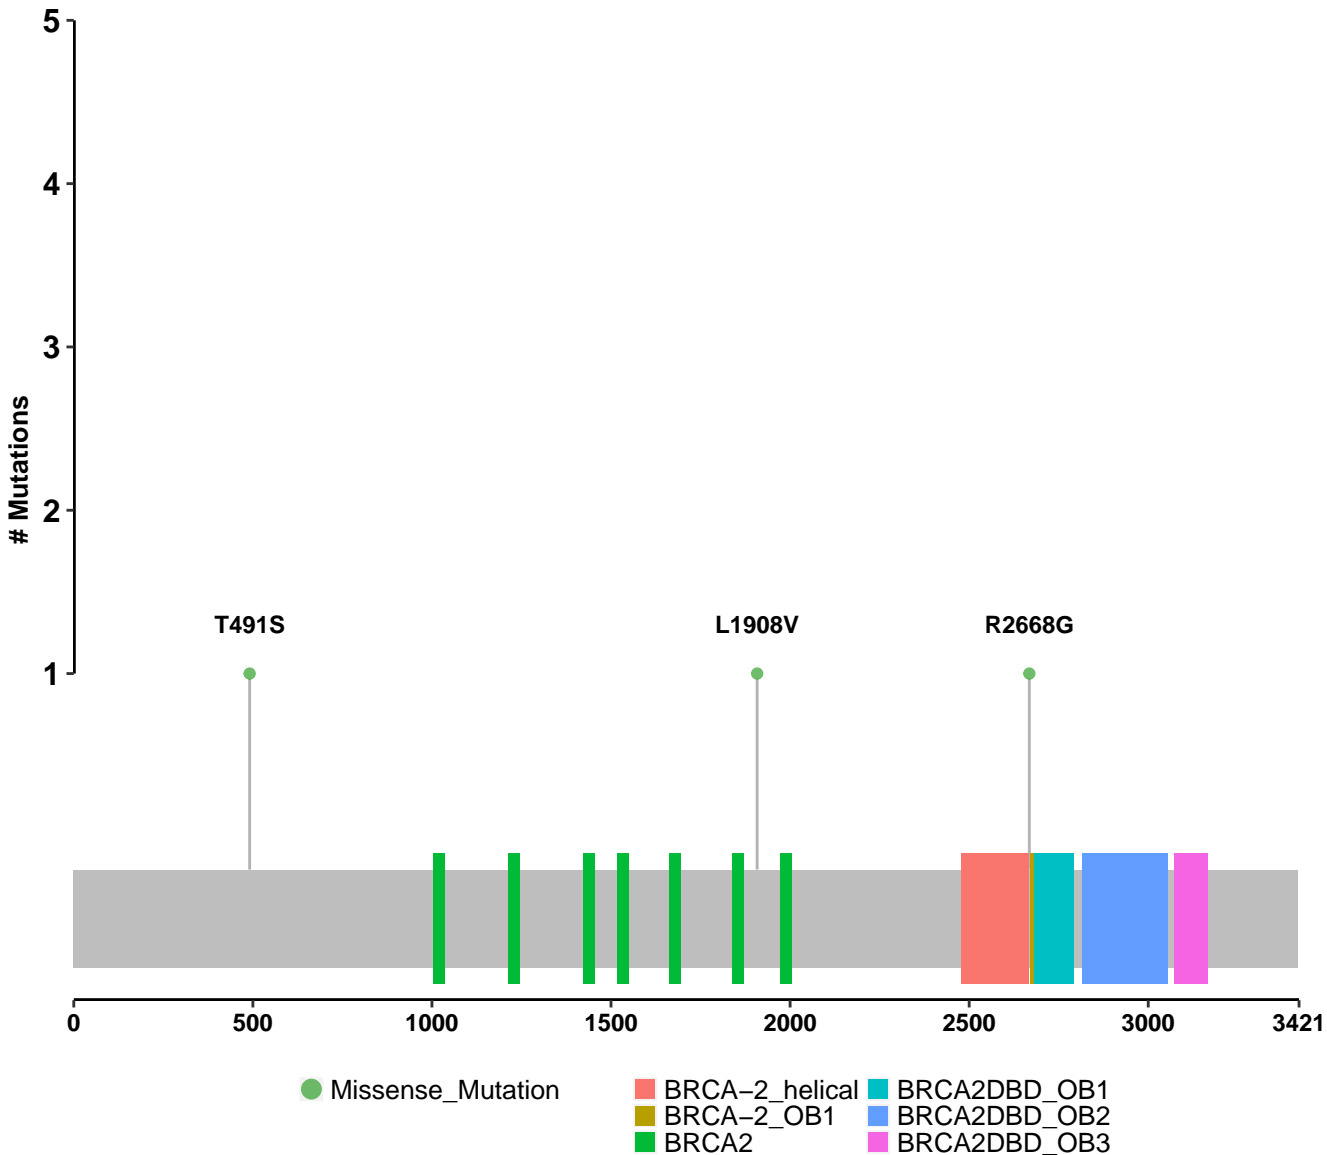

# TLR6: [Somatic Mutation Rate: 6.06%]

NM\_006068

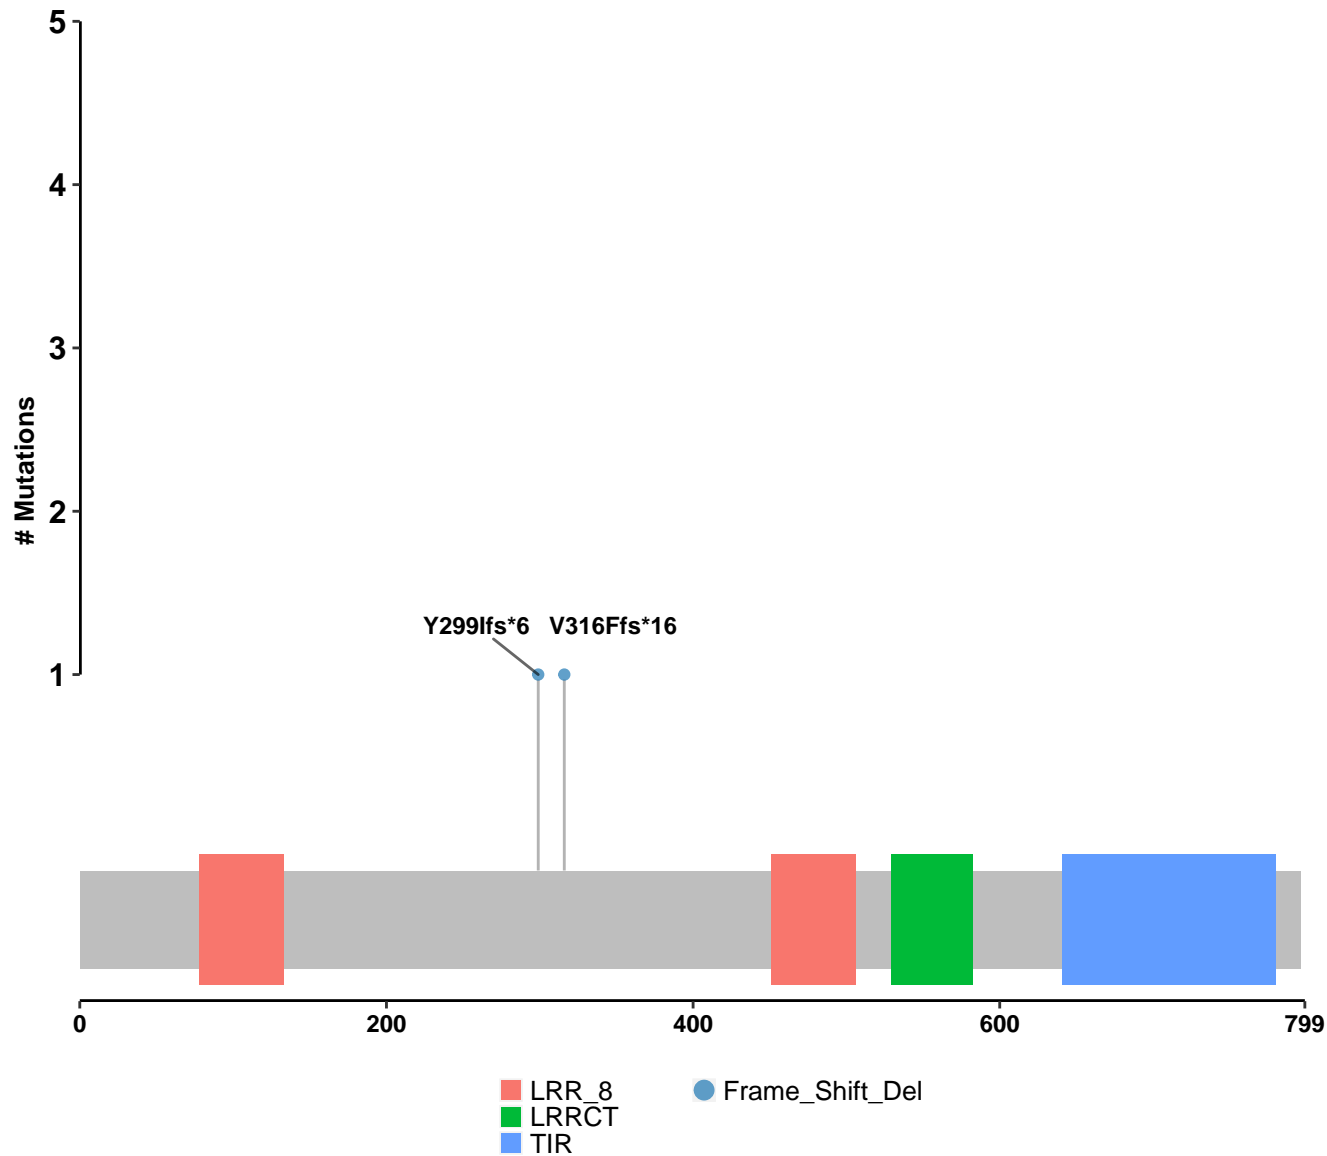

# USP7: [Somatic Mutation Rate: 6.06%]

NM\_003470

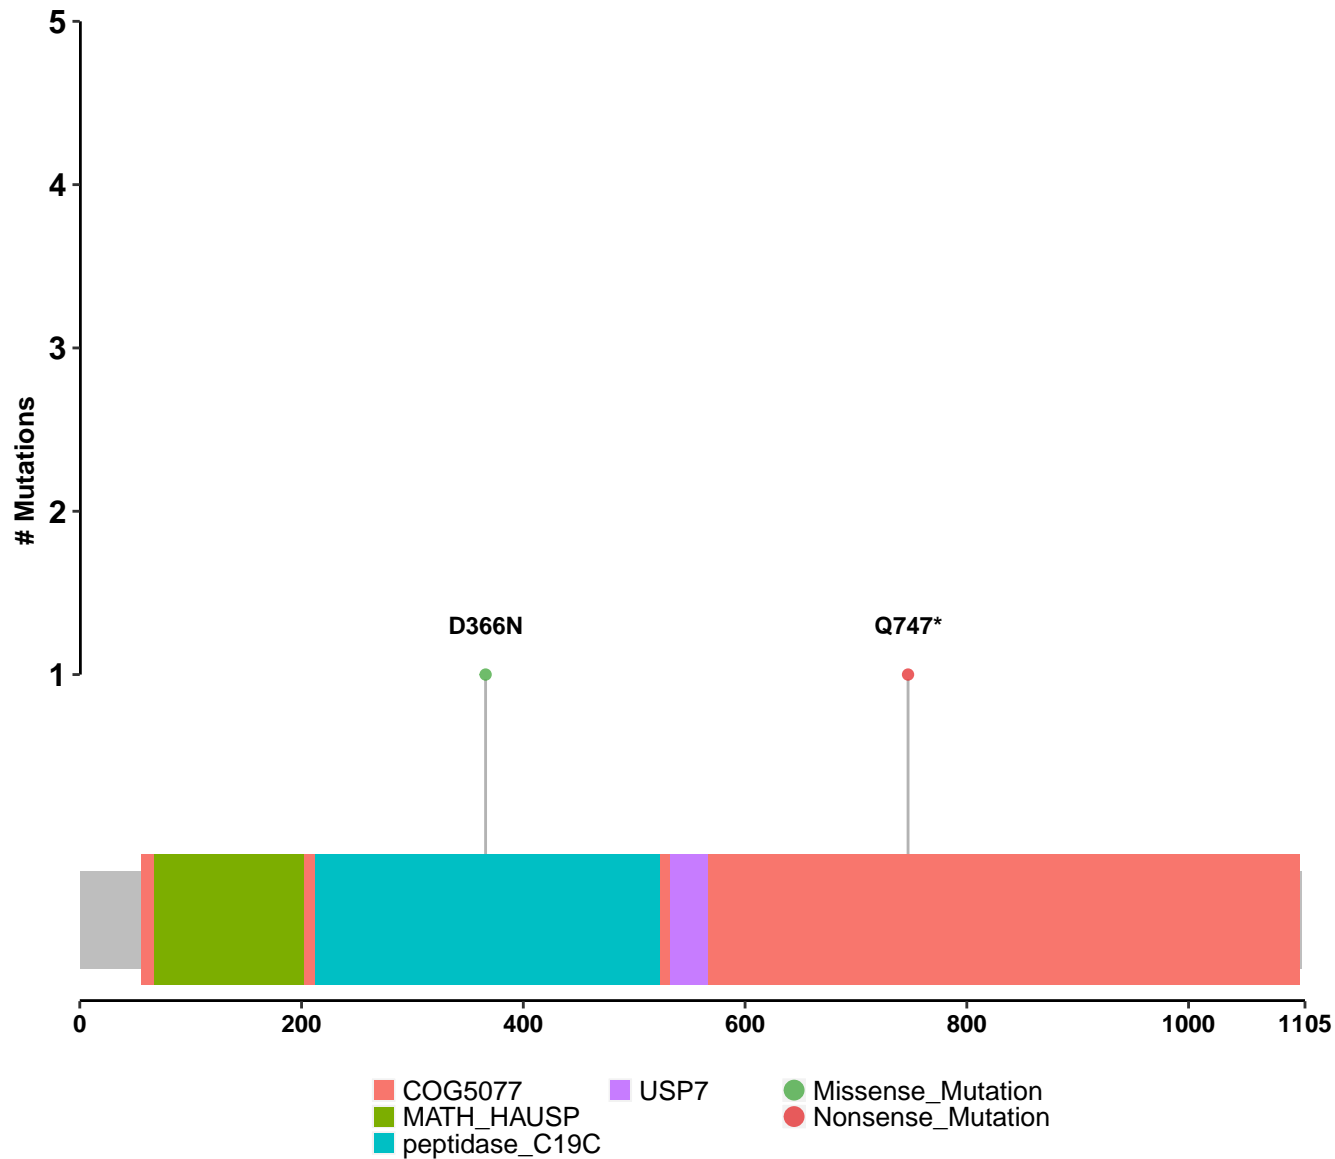



**BAD: [Somatic Mutation Rate: 3.03%]**

**NM\_004322**

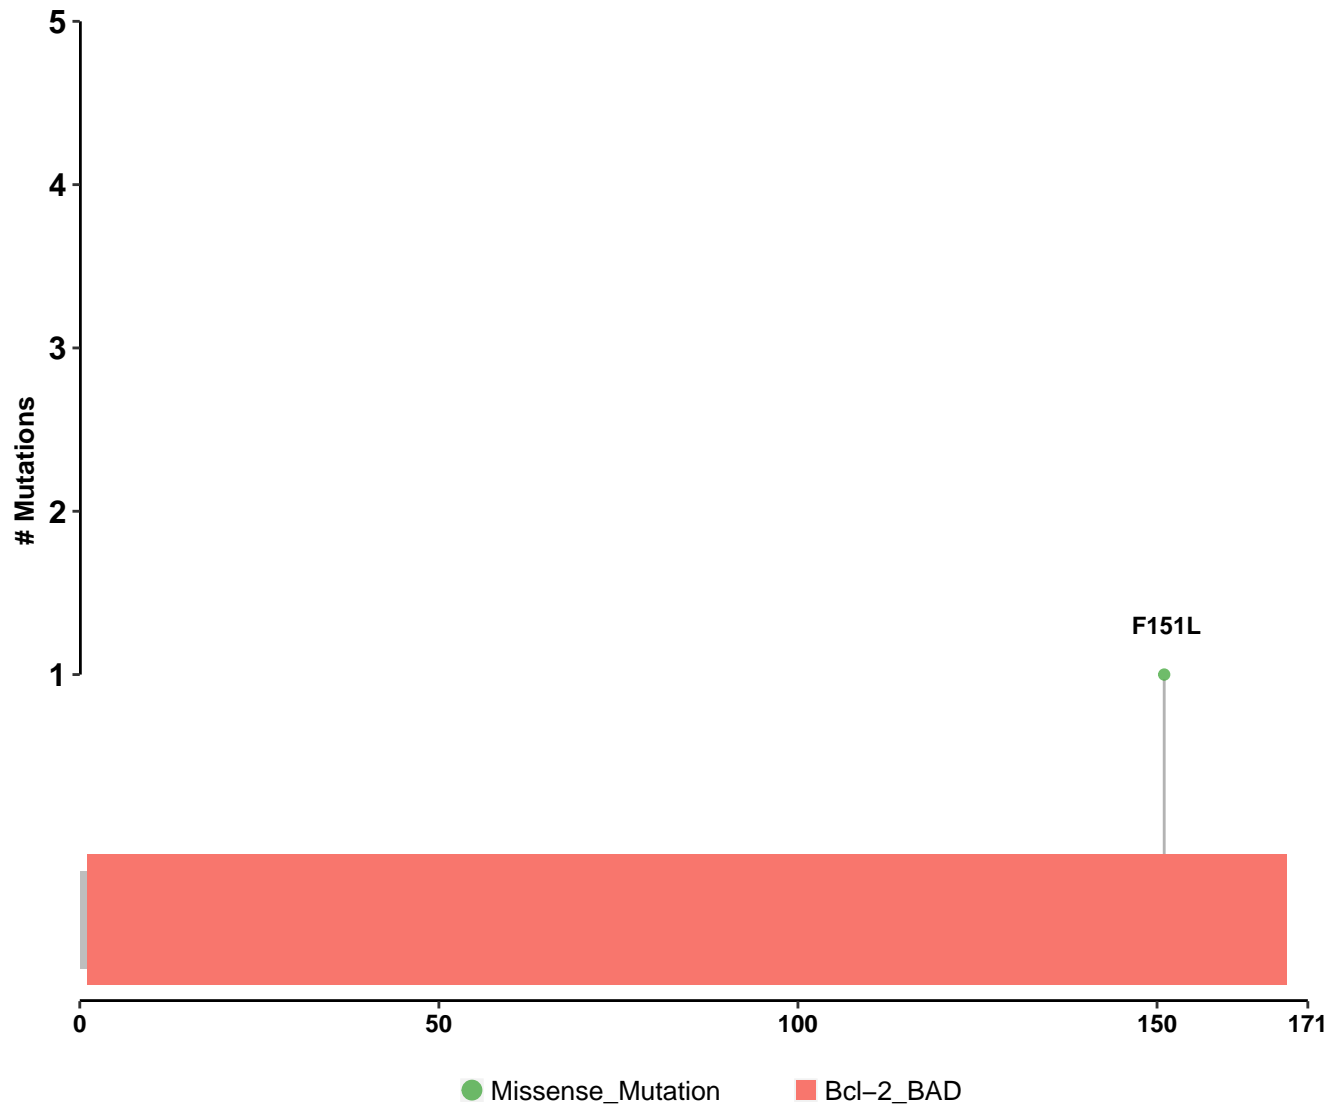

# BAK1: [Somatic Mutation Rate: 3.03%]

NM\_001188

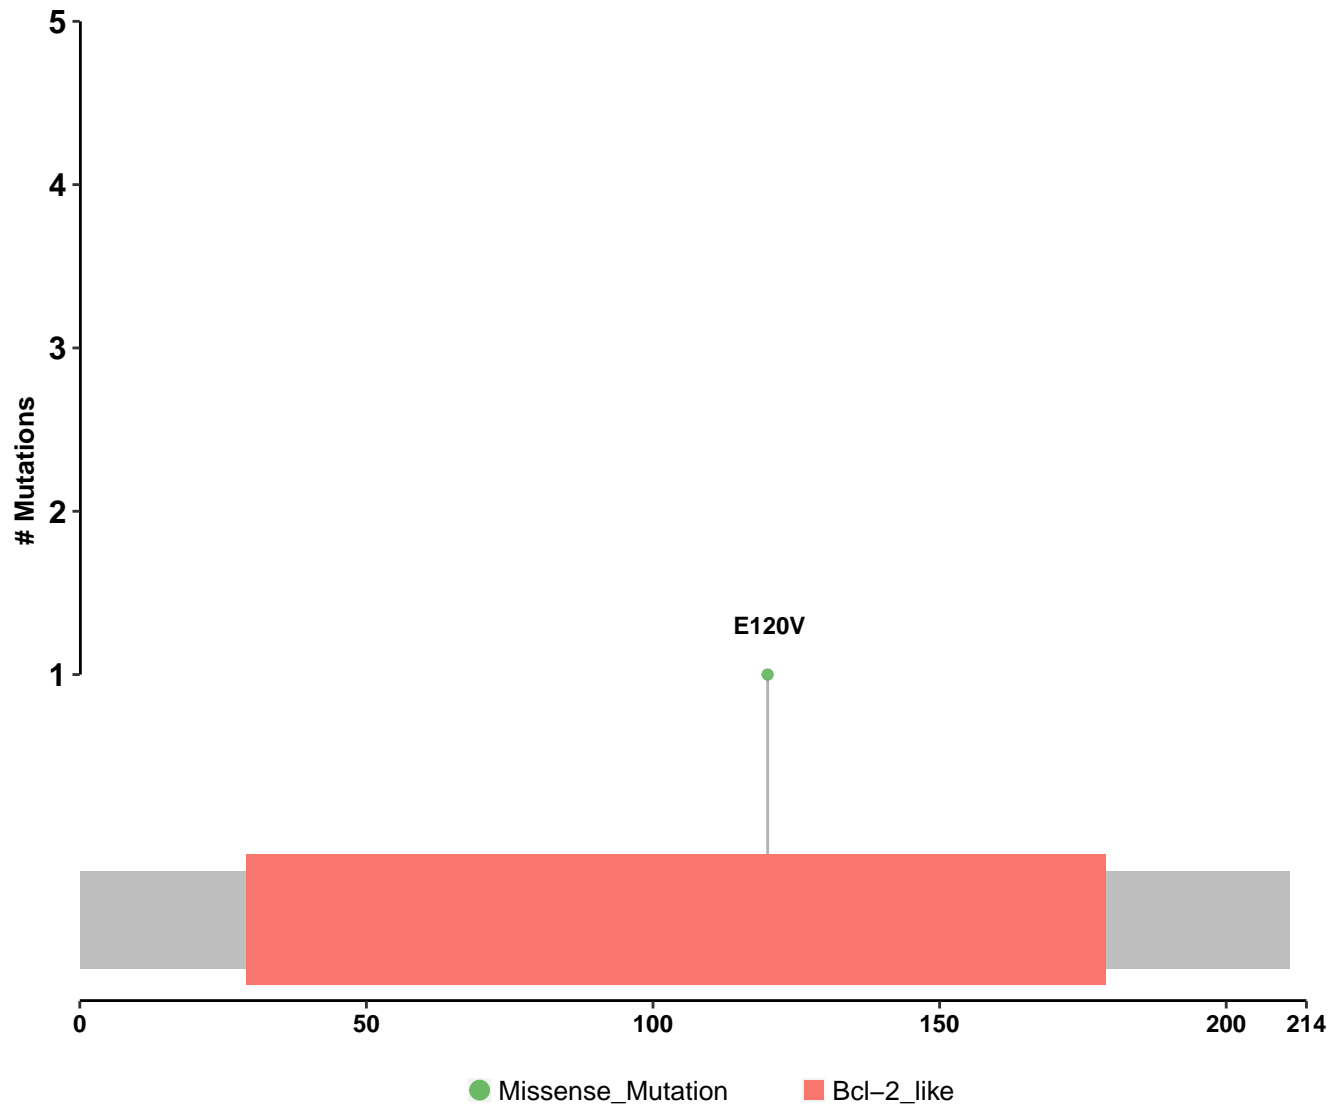

# BIRC2: [Somatic Mutation Rate: 3.03%]

NM\_001166

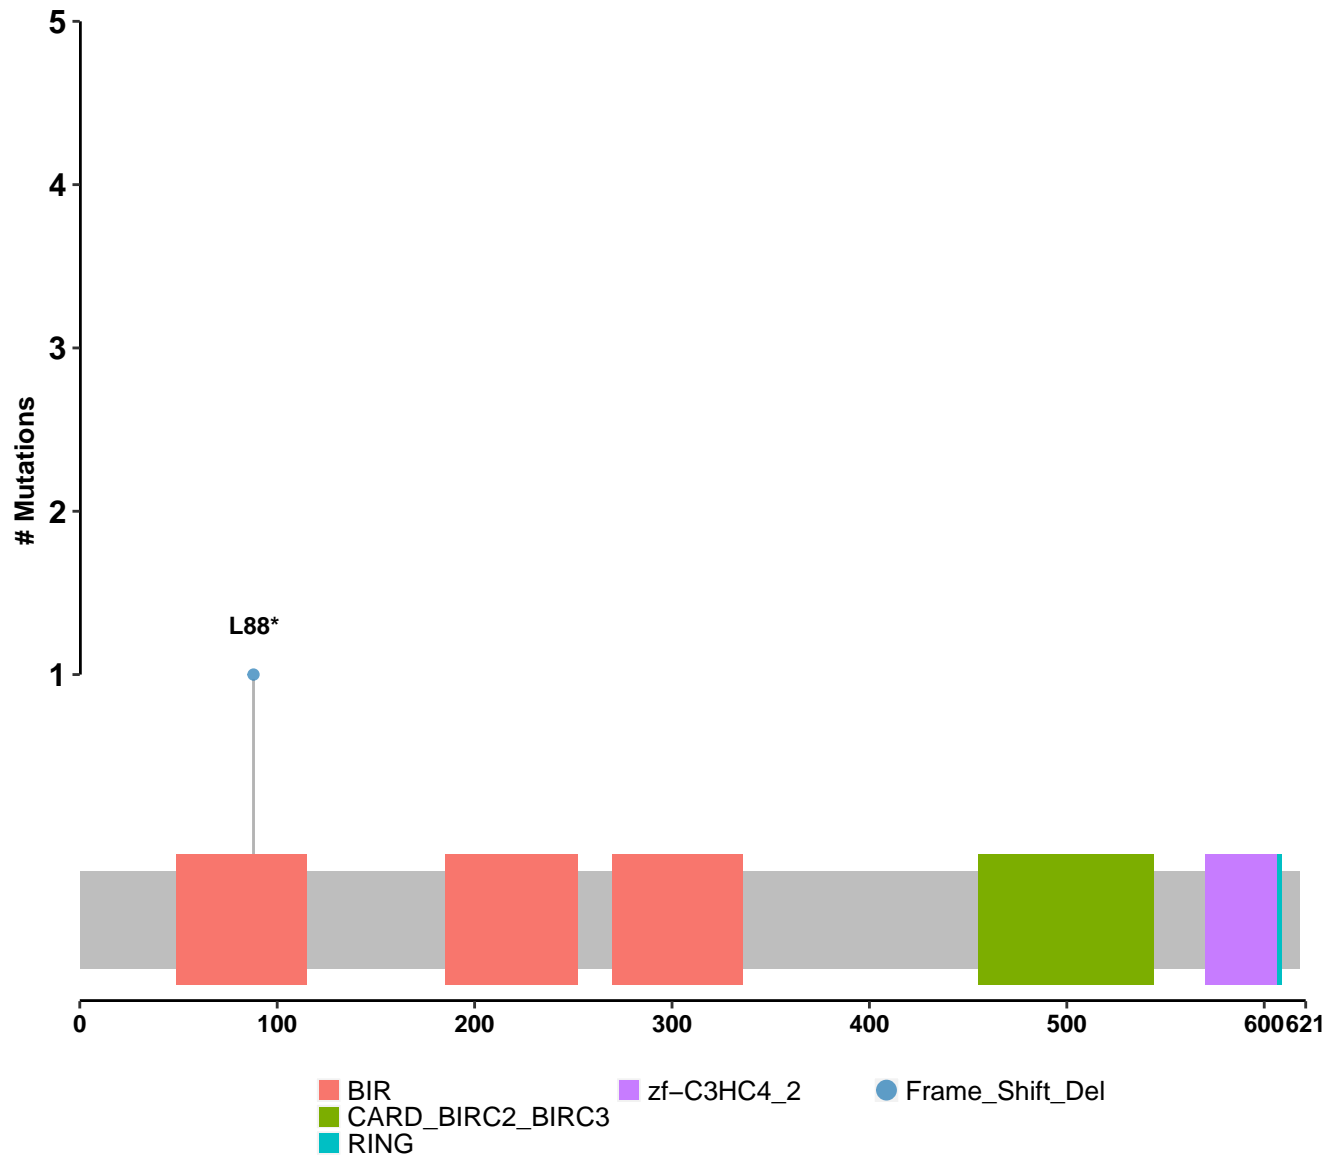

# CARD11: [Somatic Mutation Rate: 3.03%]

NM\_032415

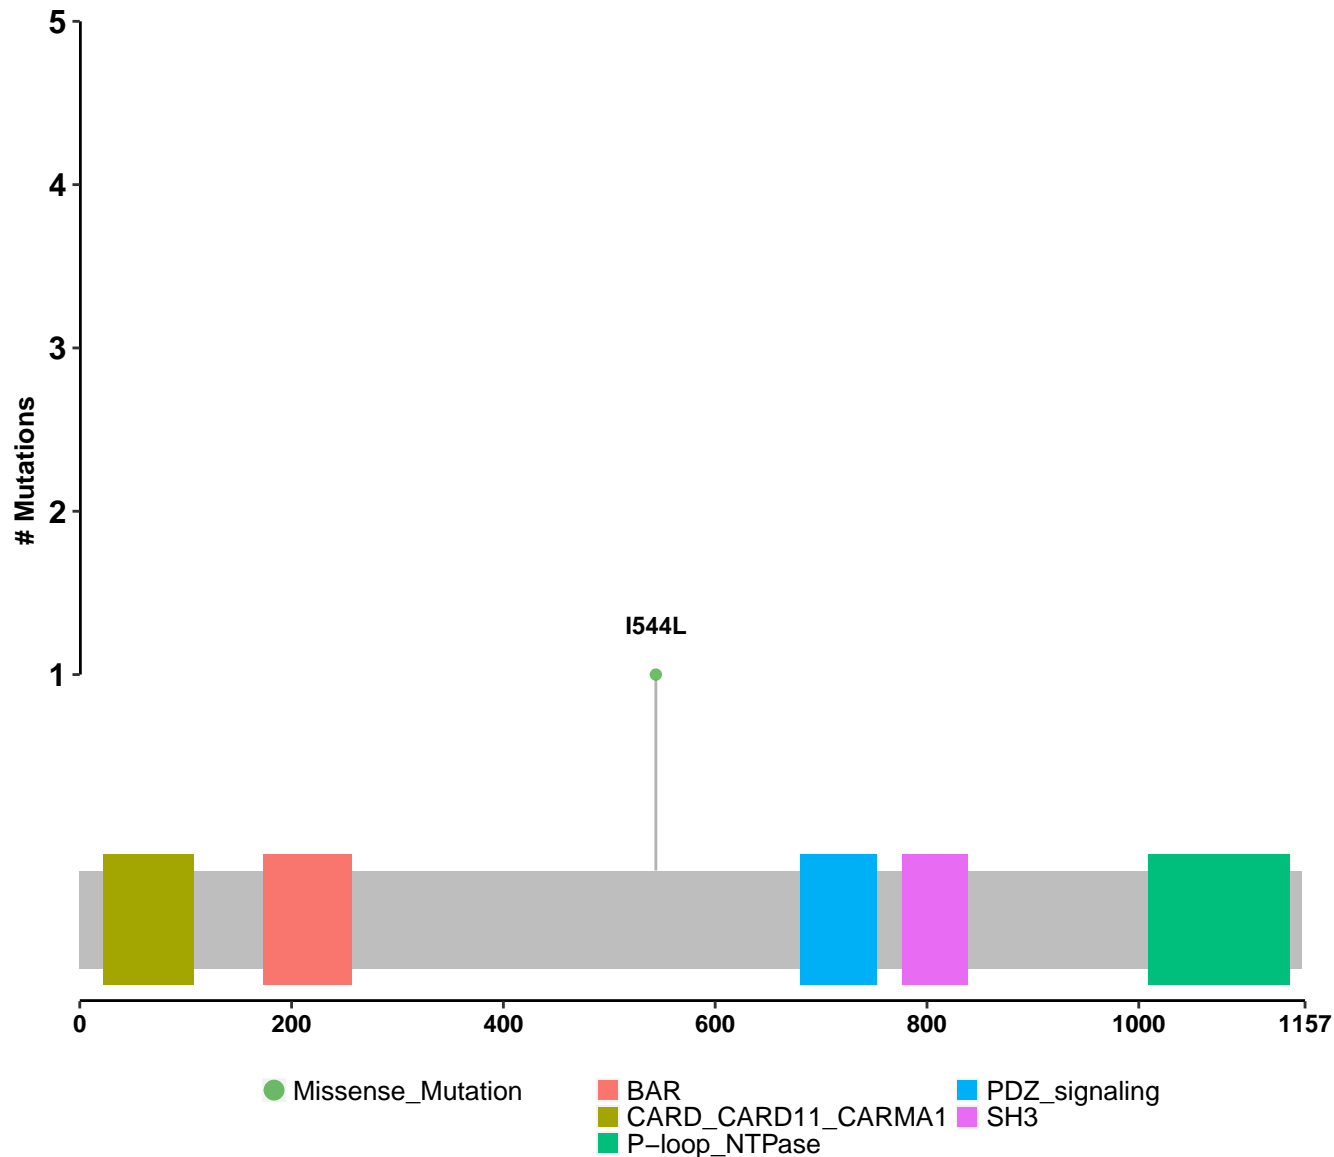

# CASP9: [Somatic Mutation Rate: 3.03%]

NM\_001229

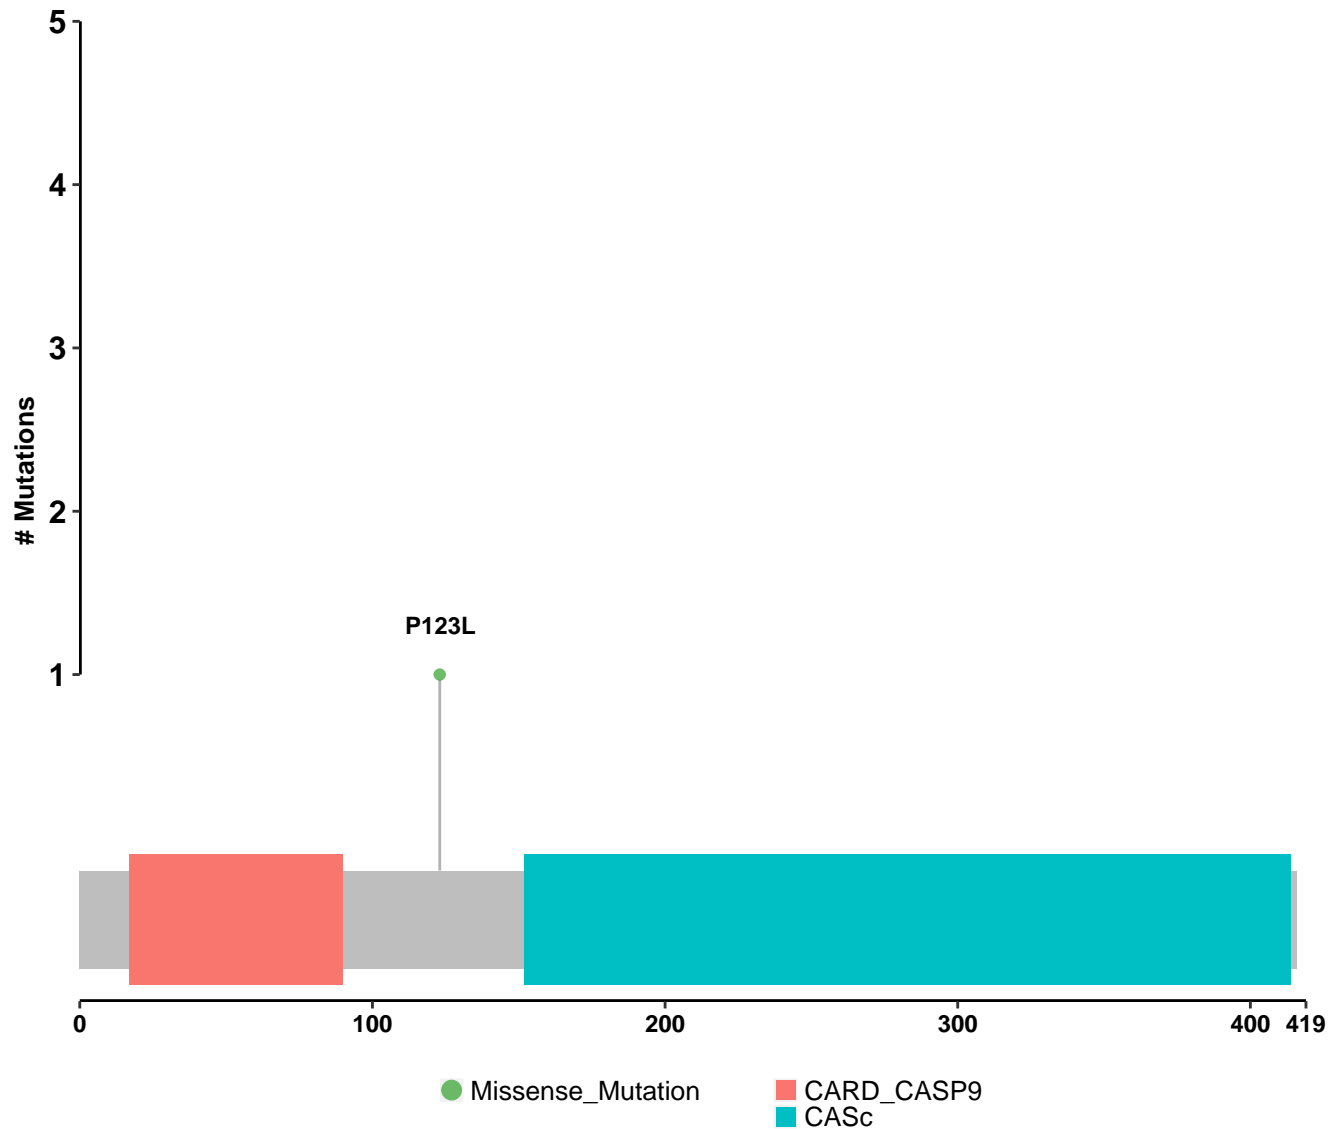

# CDKN2A: [Somatic Mutation Rate: 3.03%]

NM\_001195132

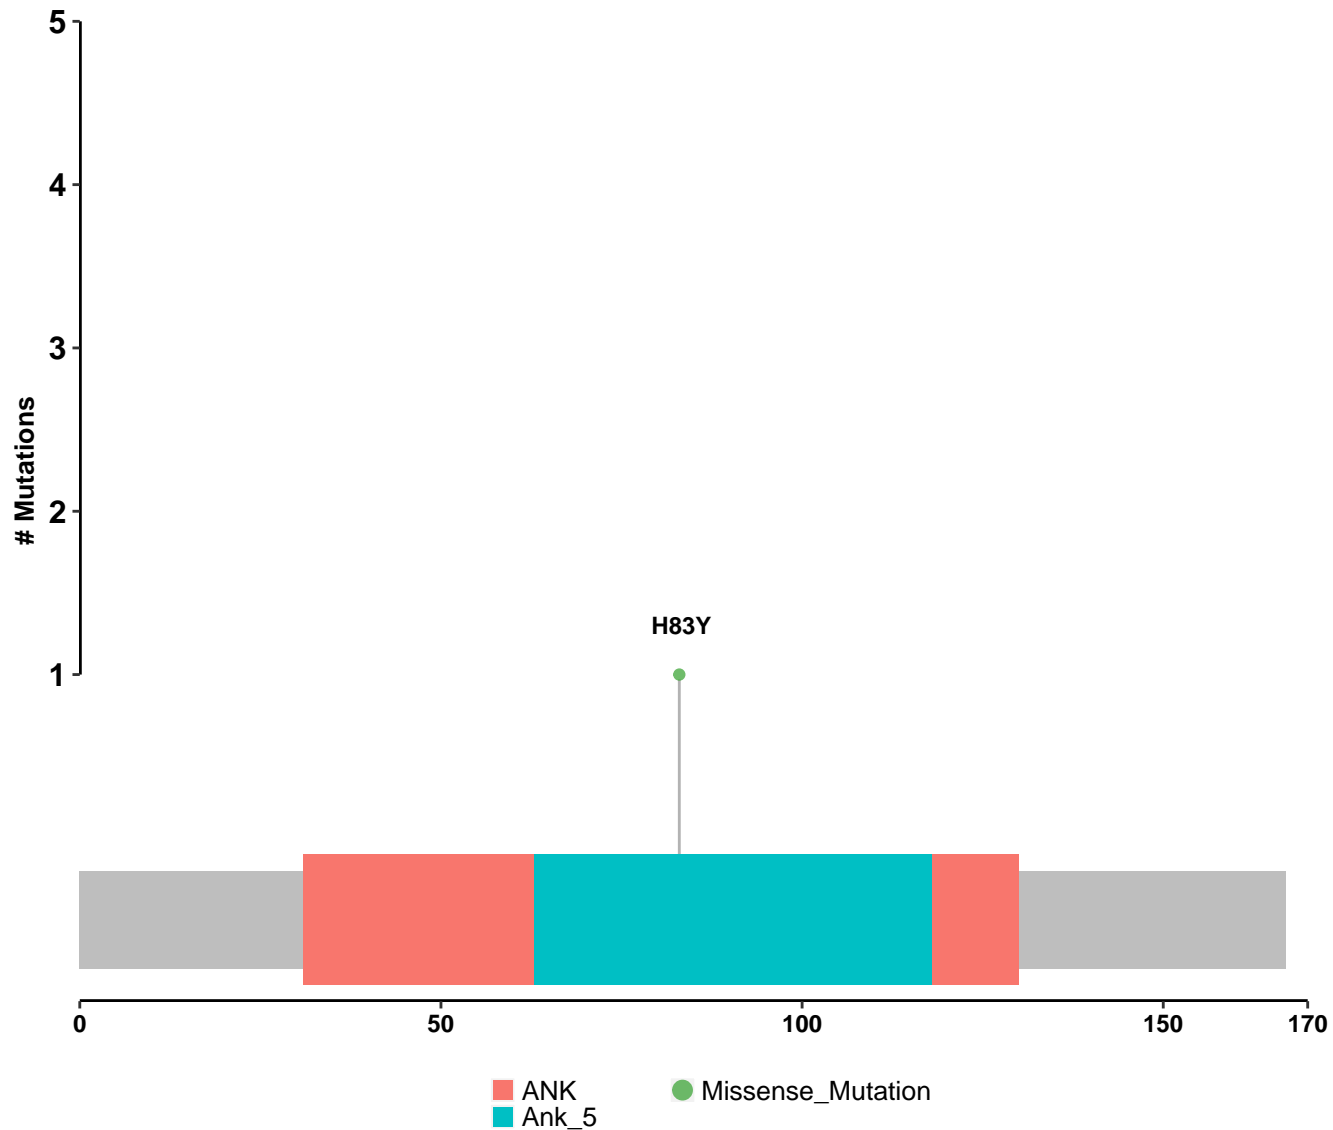

# CFLAR: [Somatic Mutation Rate: 3.03%]

NM\_003879

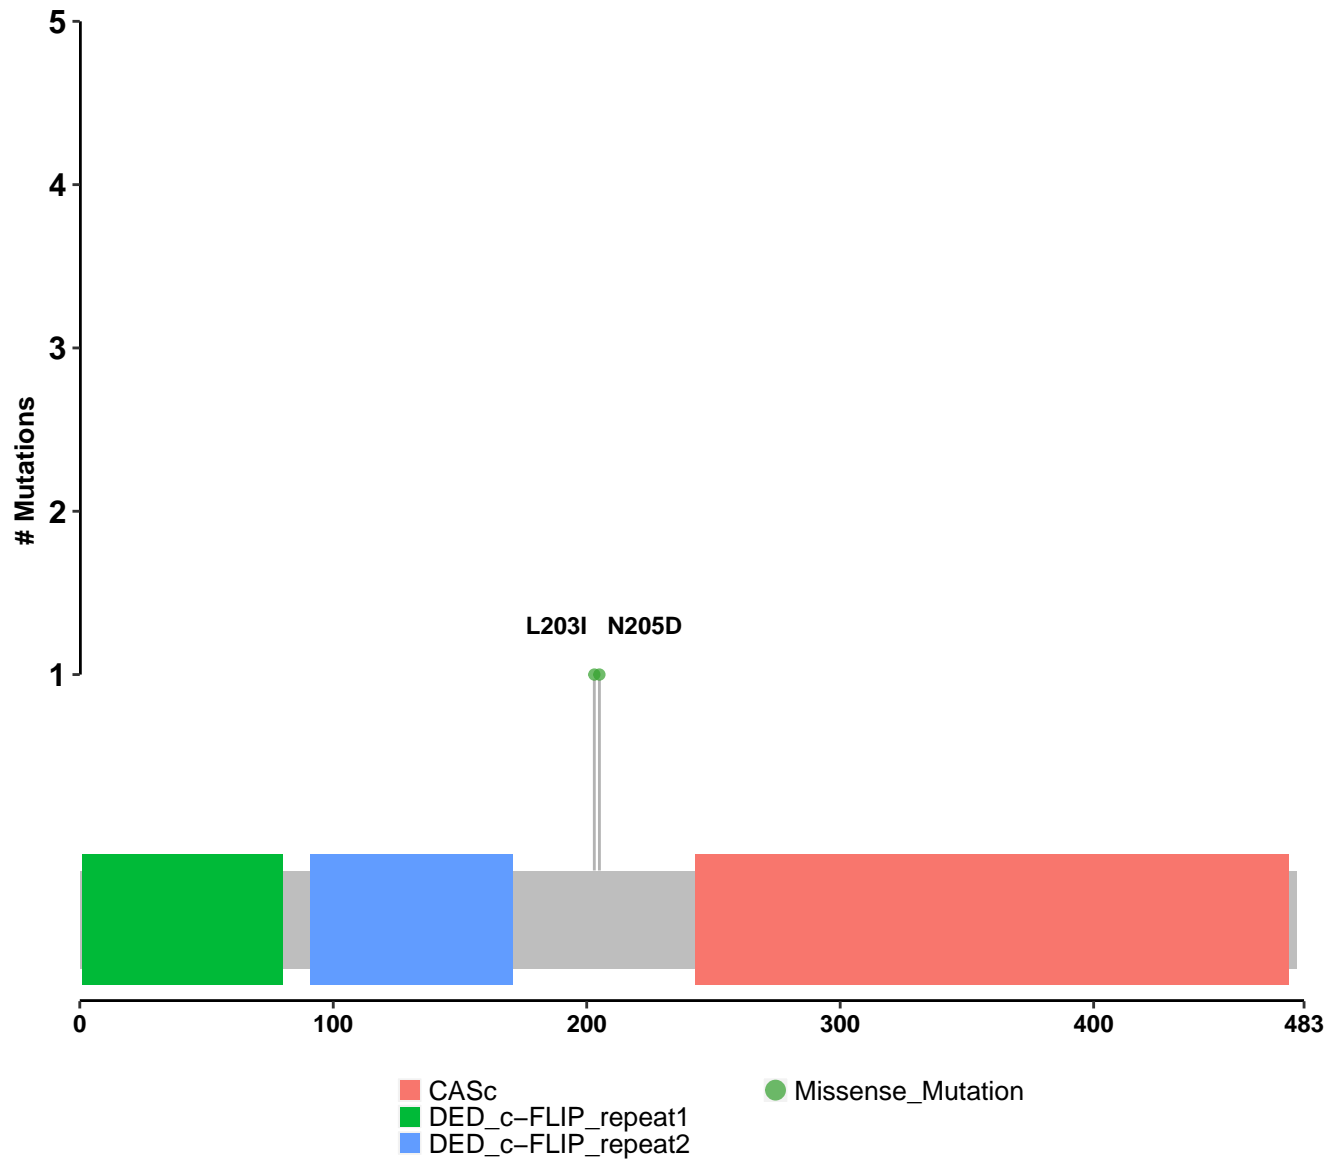

# E2F1: [Somatic Mutation Rate: 3.03%]

NM\_005225

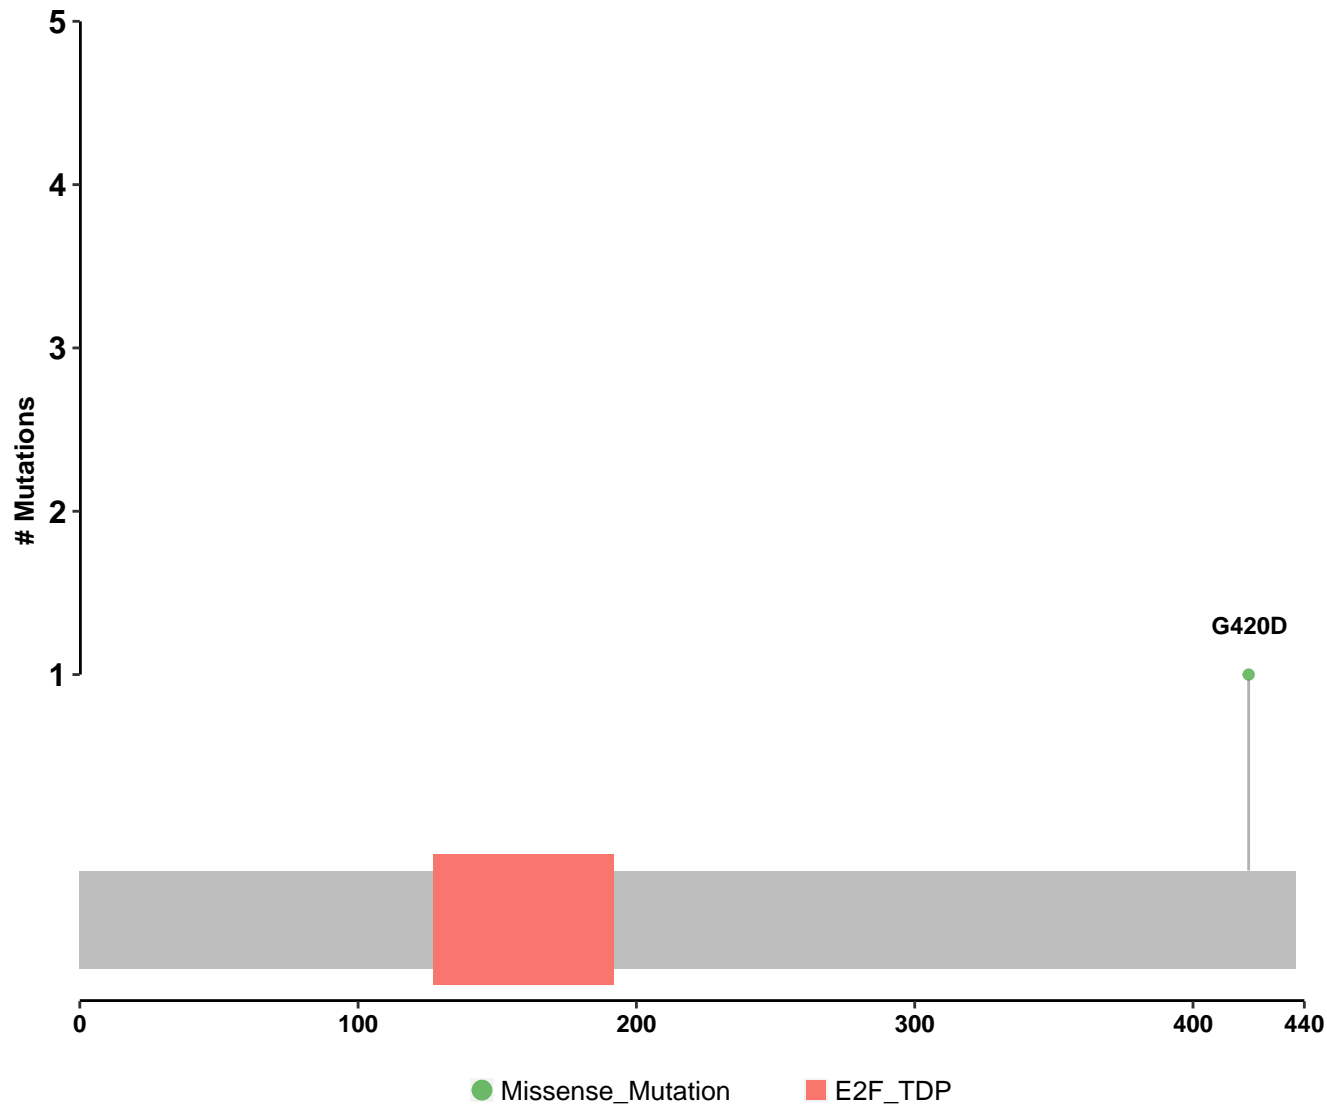



# KRAS: [Somatic Mutation Rate: 27.27%]

NM\_033360

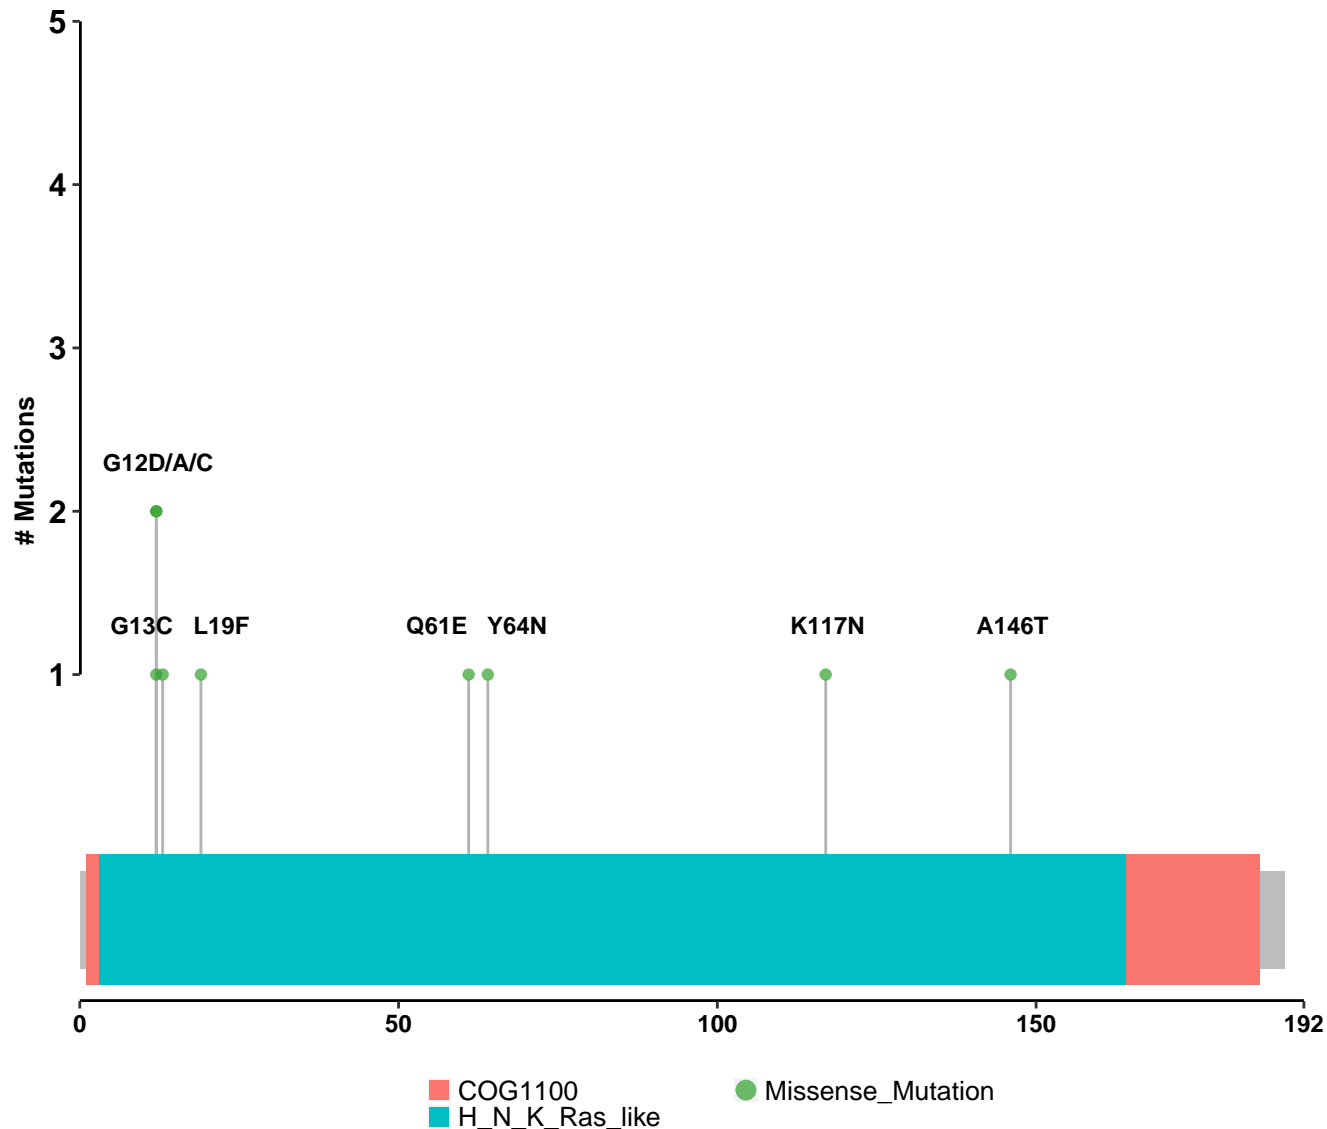

# FANCL: [Somatic Mutation Rate: 3.03%]

NM\_001114636

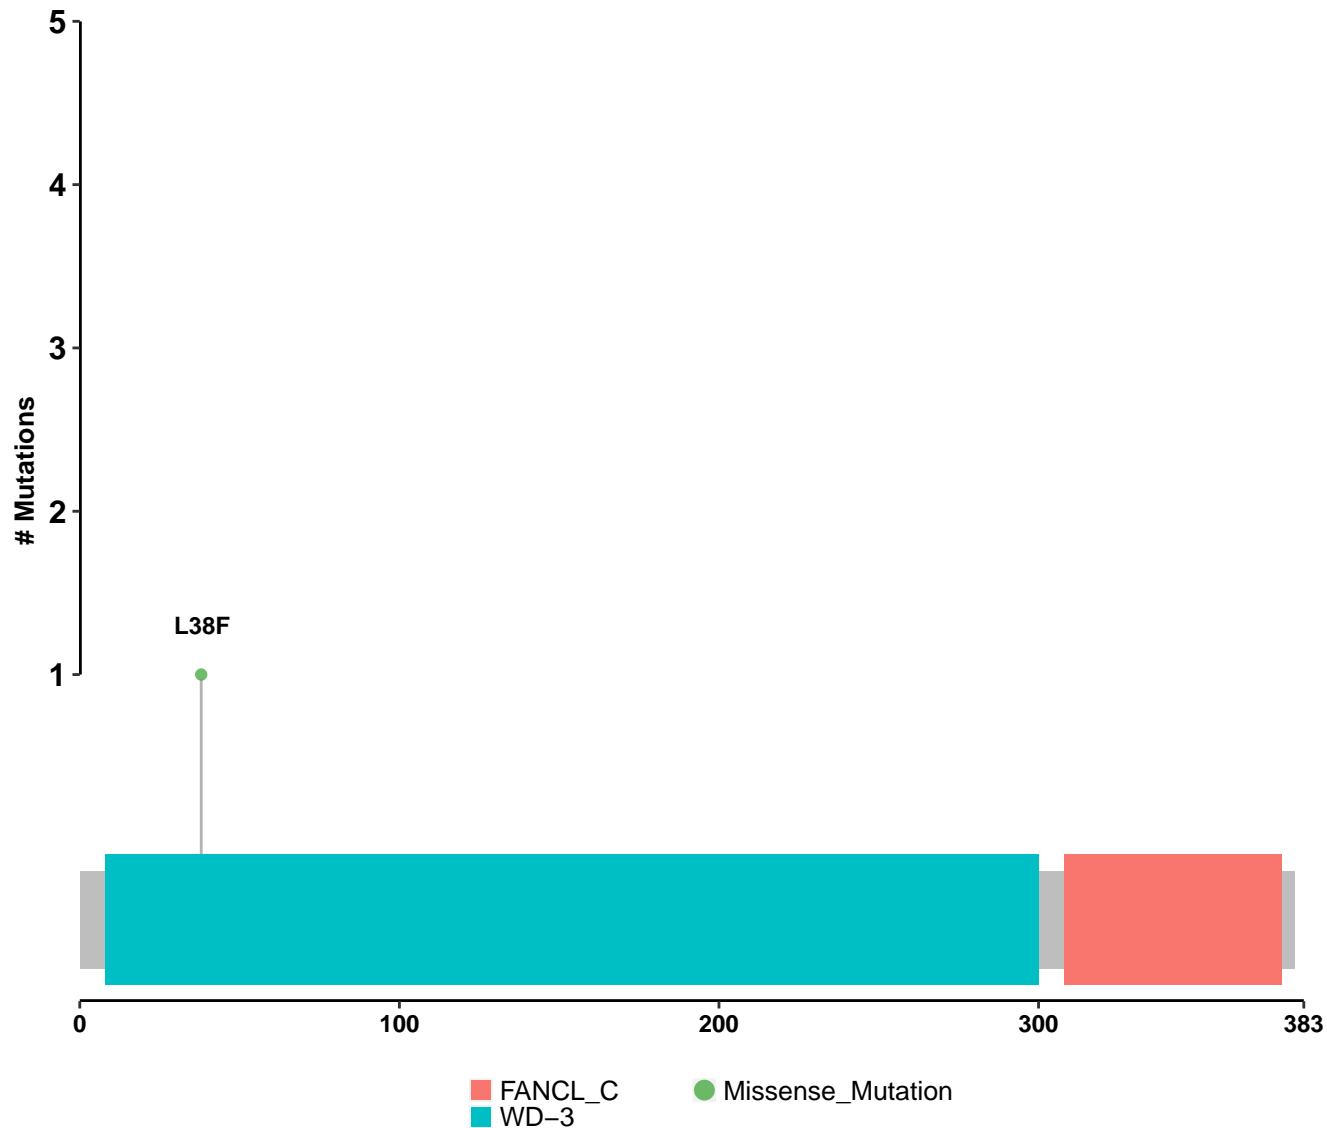

# FAS: [Somatic Mutation Rate: 3.03%]

NM\_000043

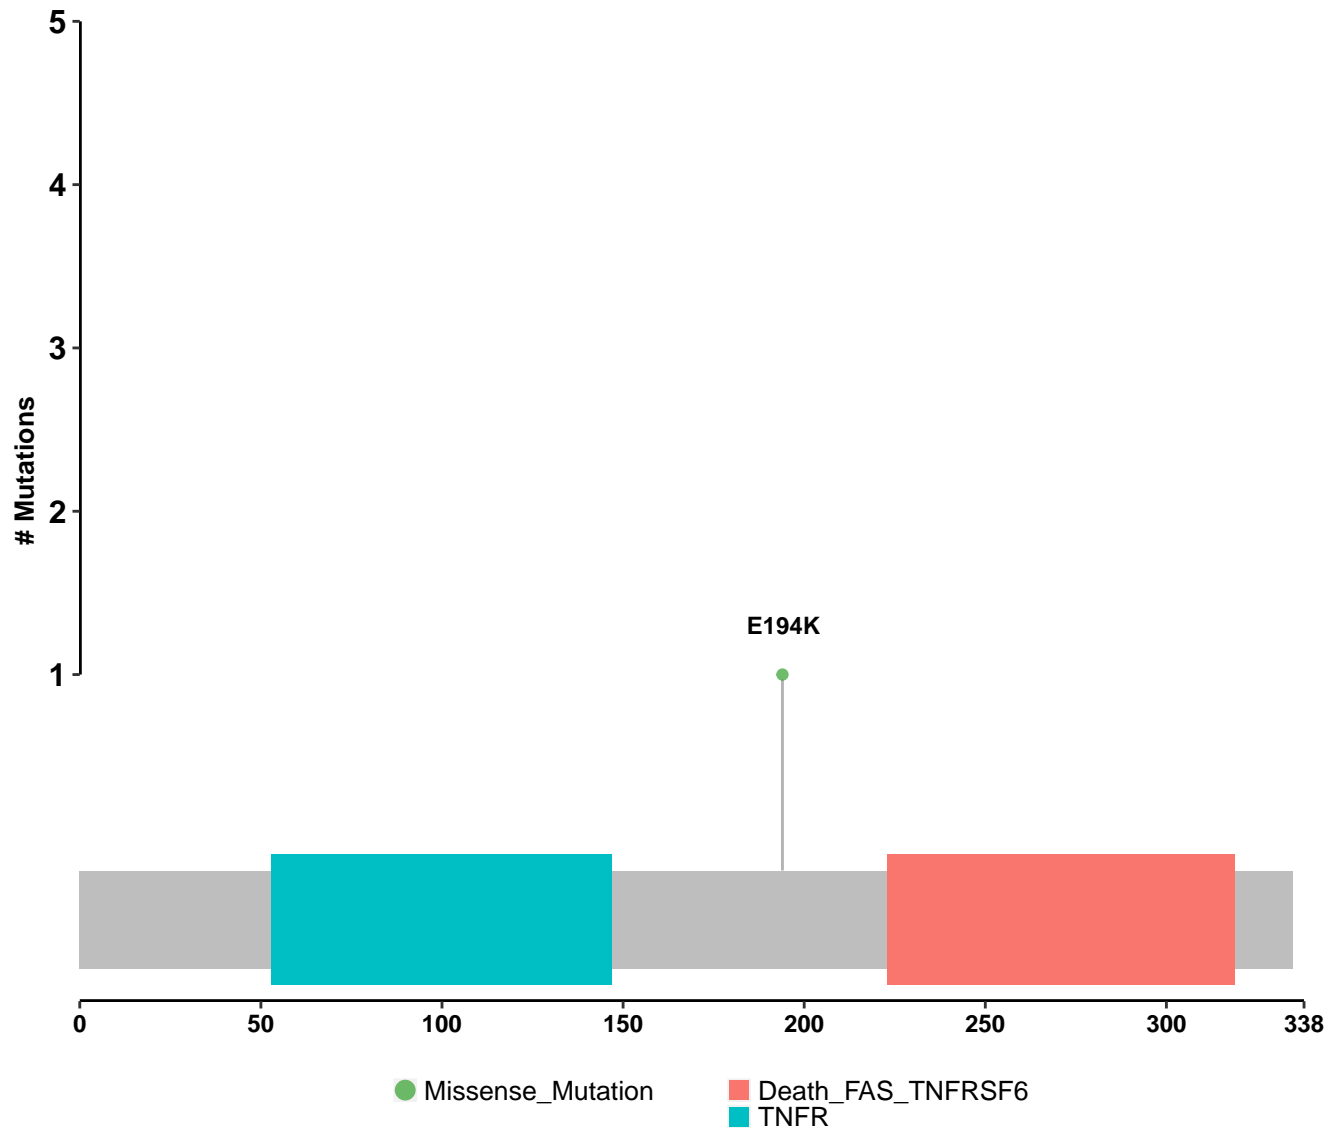

# HRAS: [Somatic Mutation Rate: 3.03%]

NM\_001130442

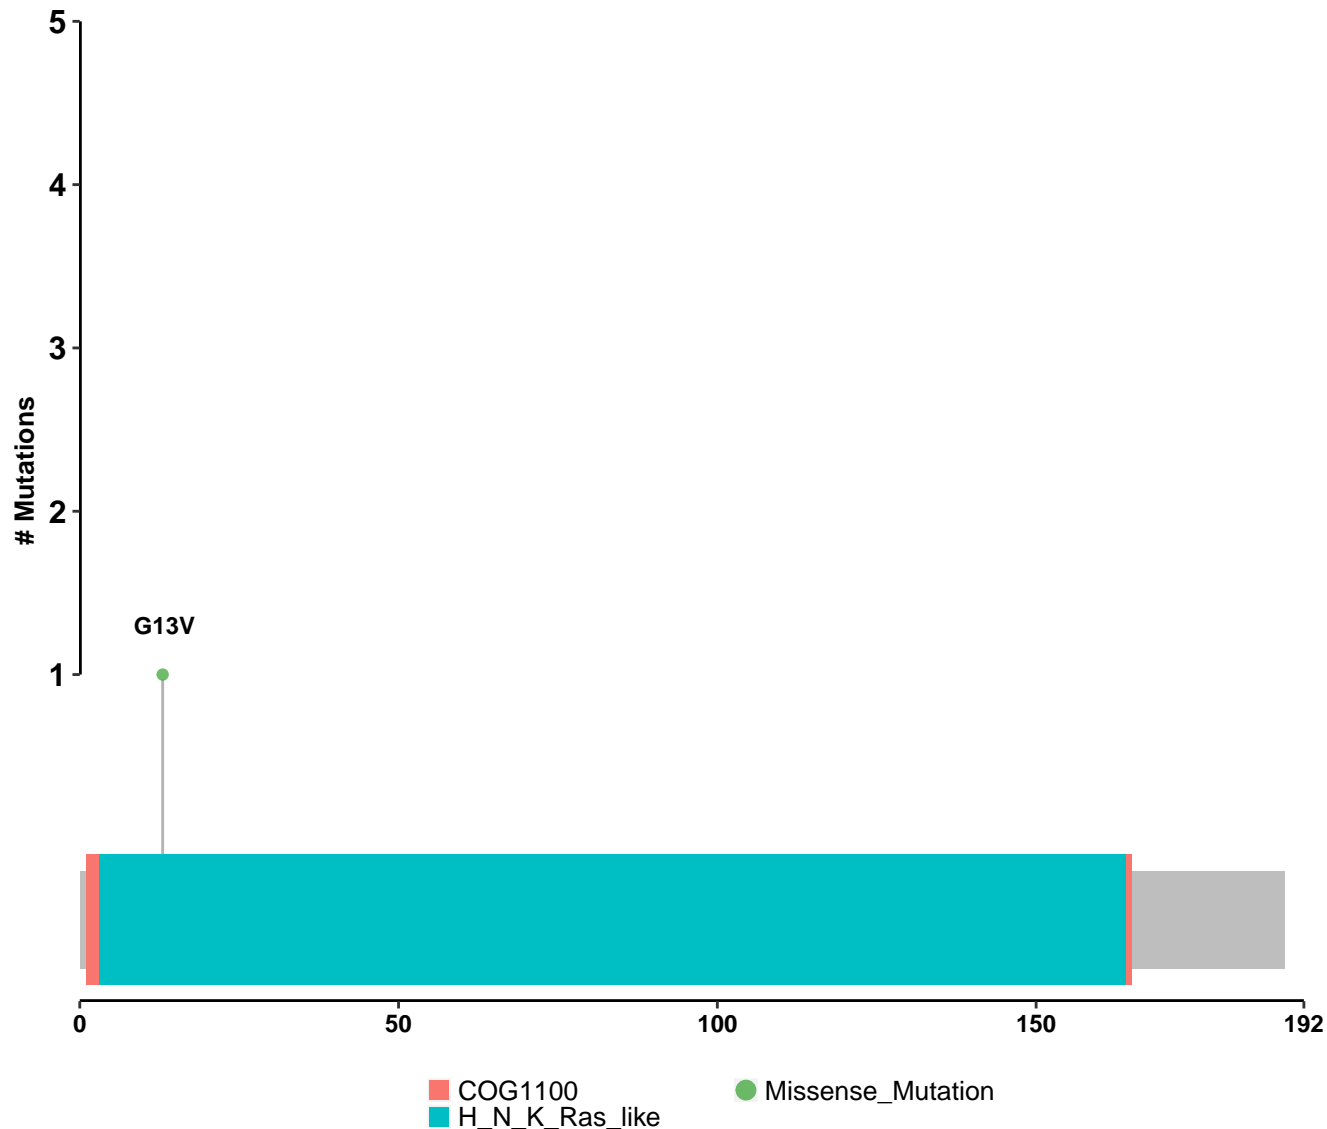

# MCL1: [Somatic Mutation Rate: 3.03%]

NM\_021960

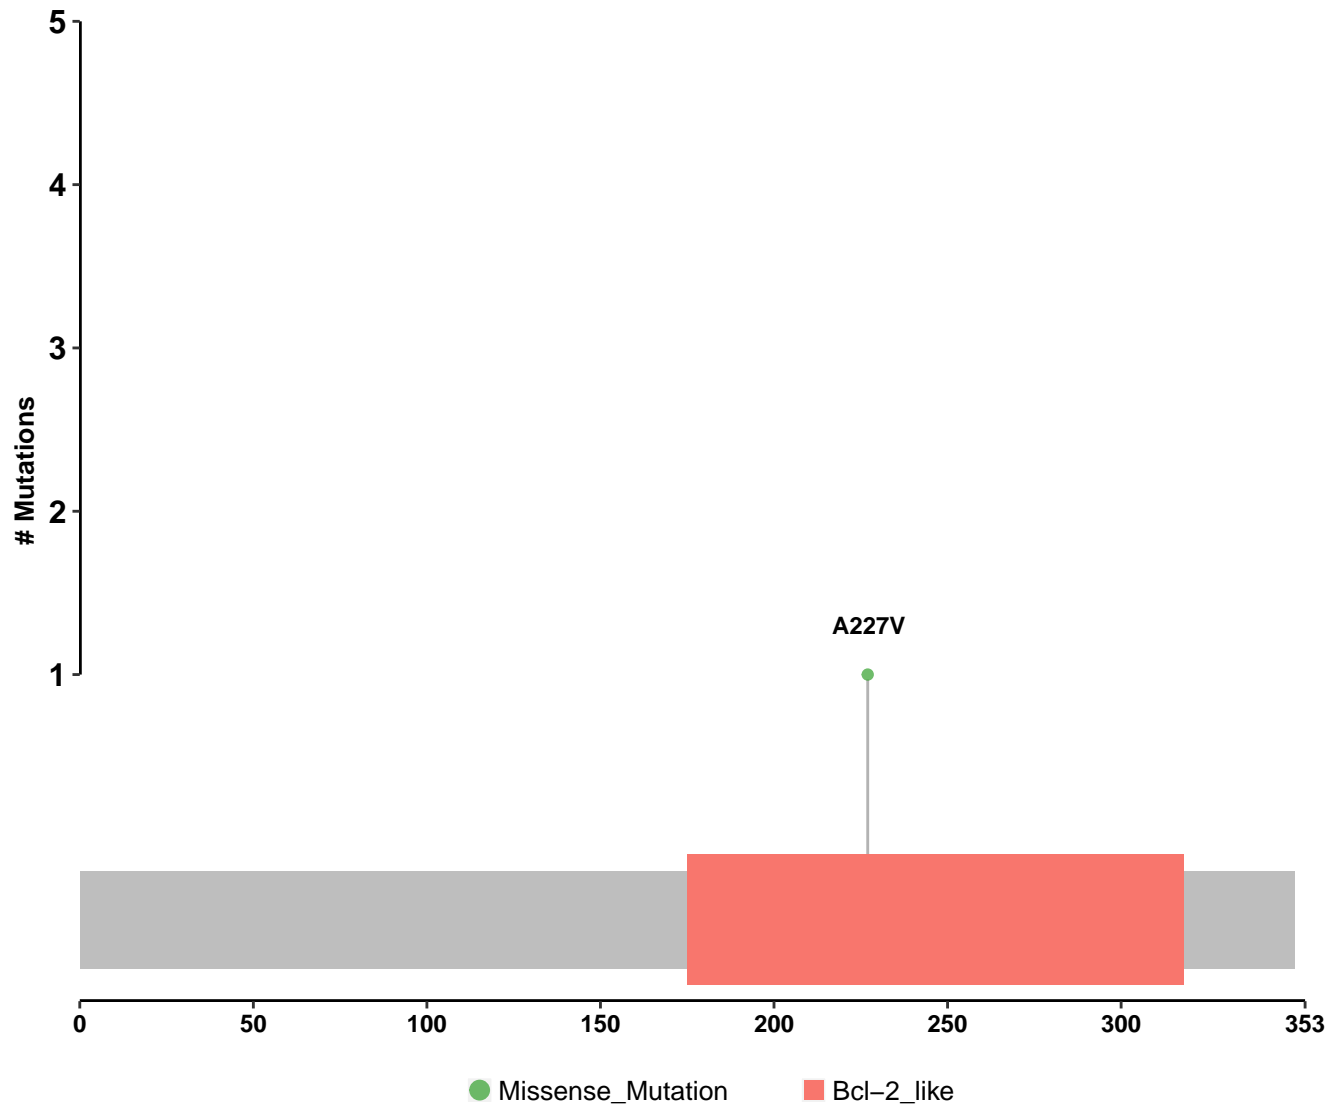

# MDM2: [Somatic Mutation Rate: 3.03%]

NM\_002392

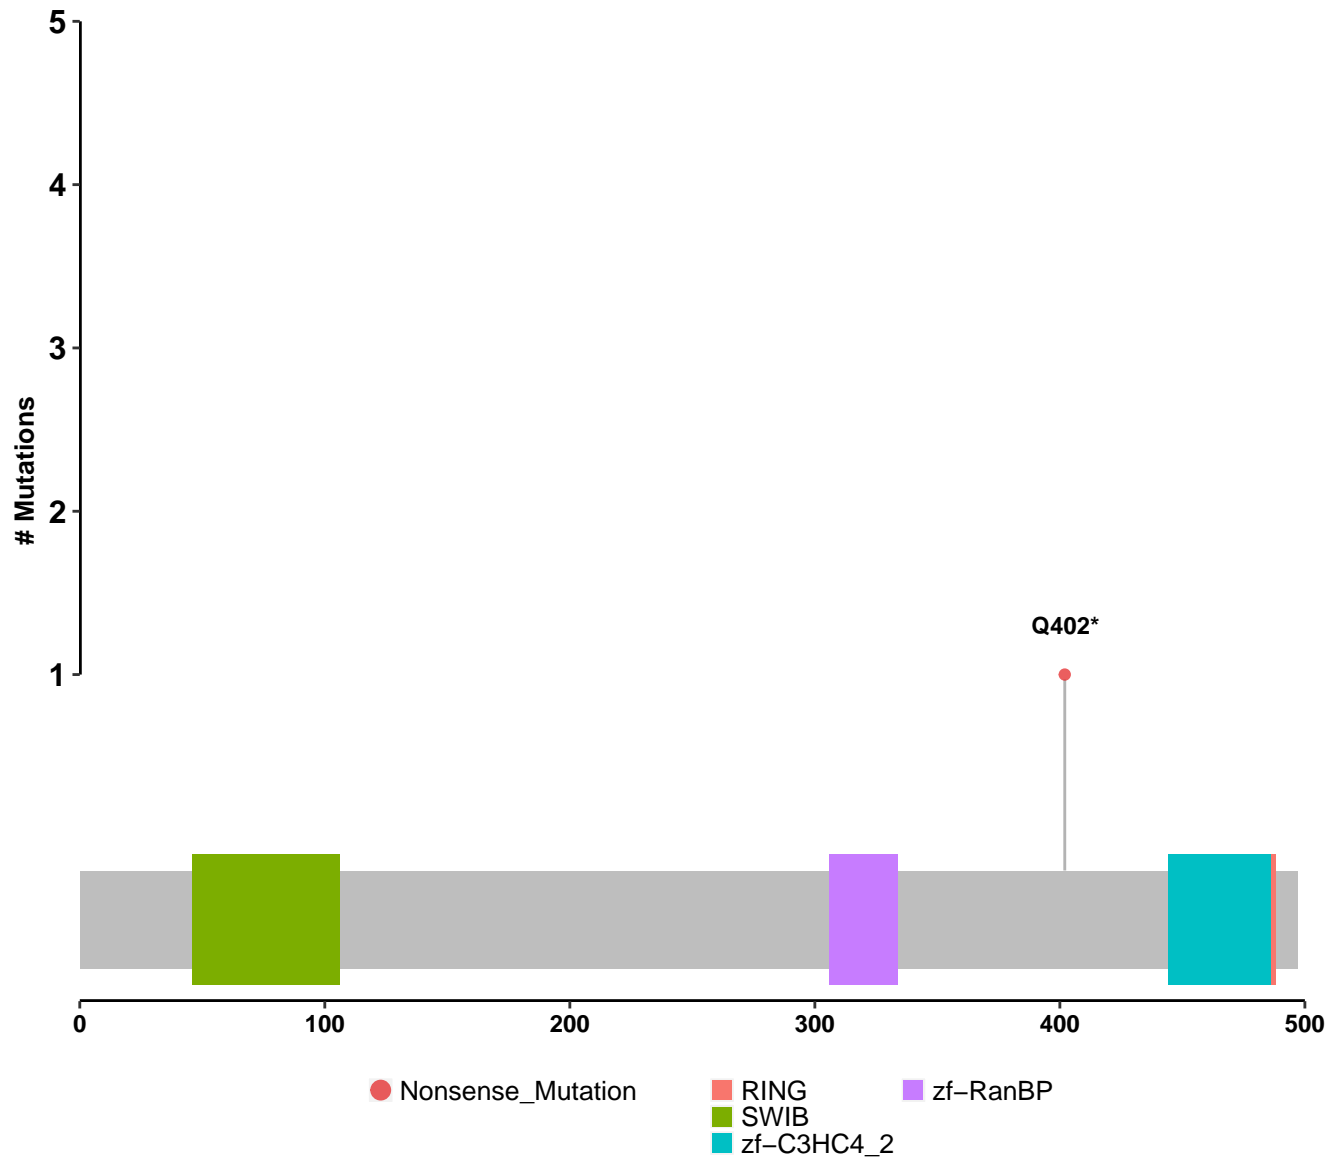

MYC: [Somatic Mutation Rate: 3.03%]

NM\_002467

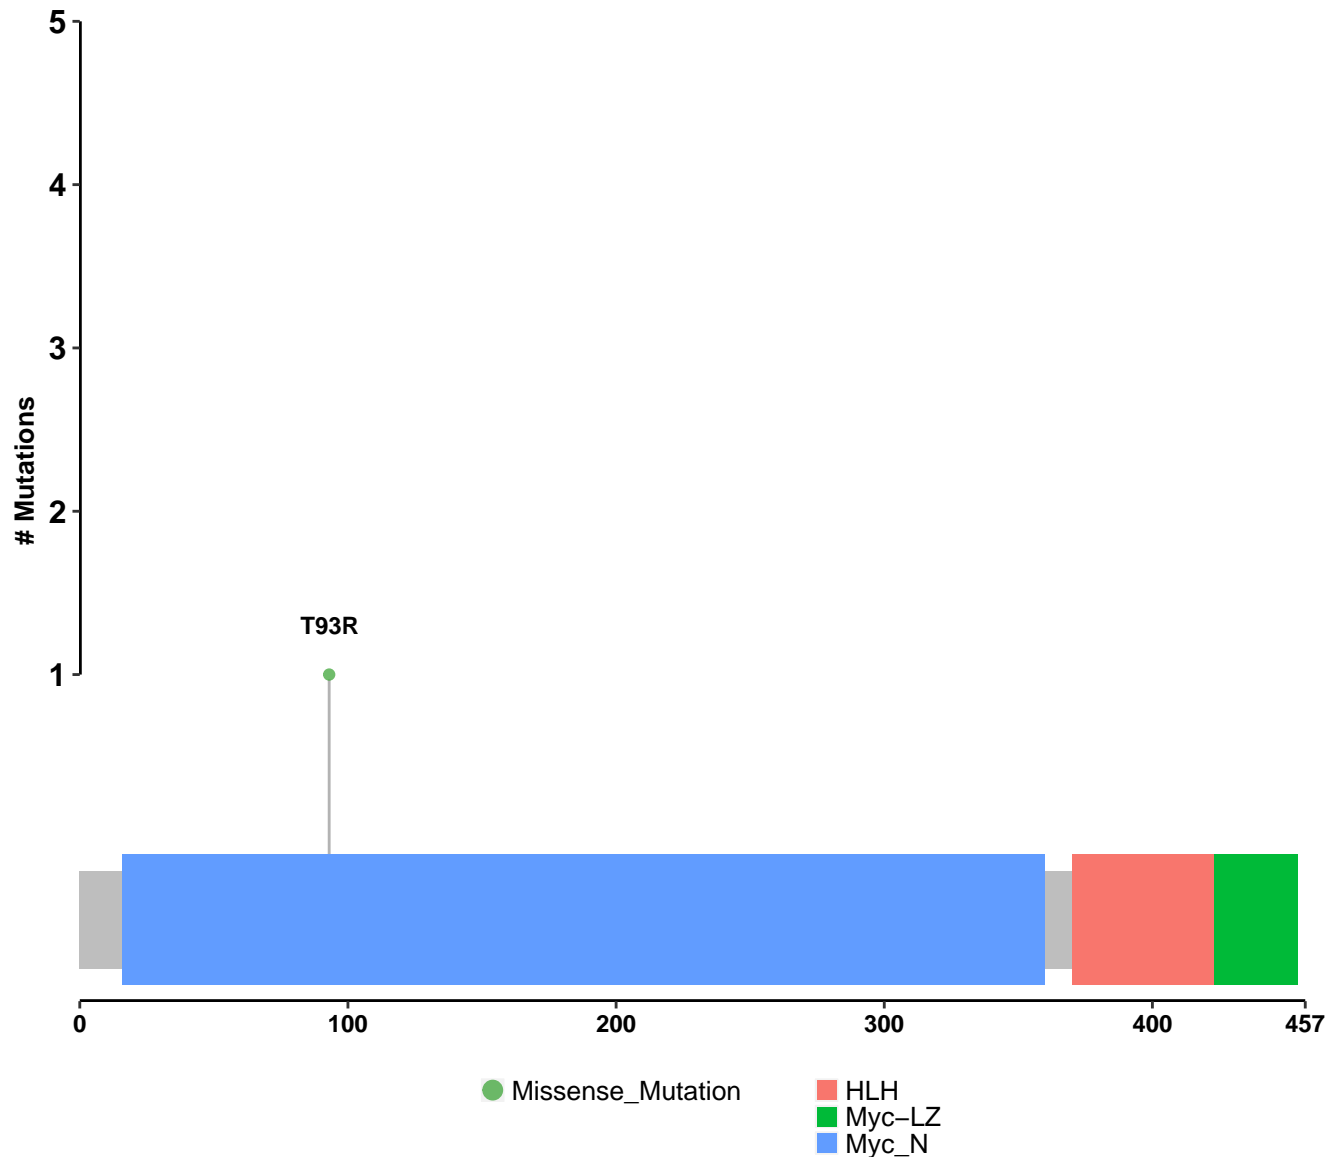

# NFKB1: [Somatic Mutation Rate: 3.03%]

NM\_003998

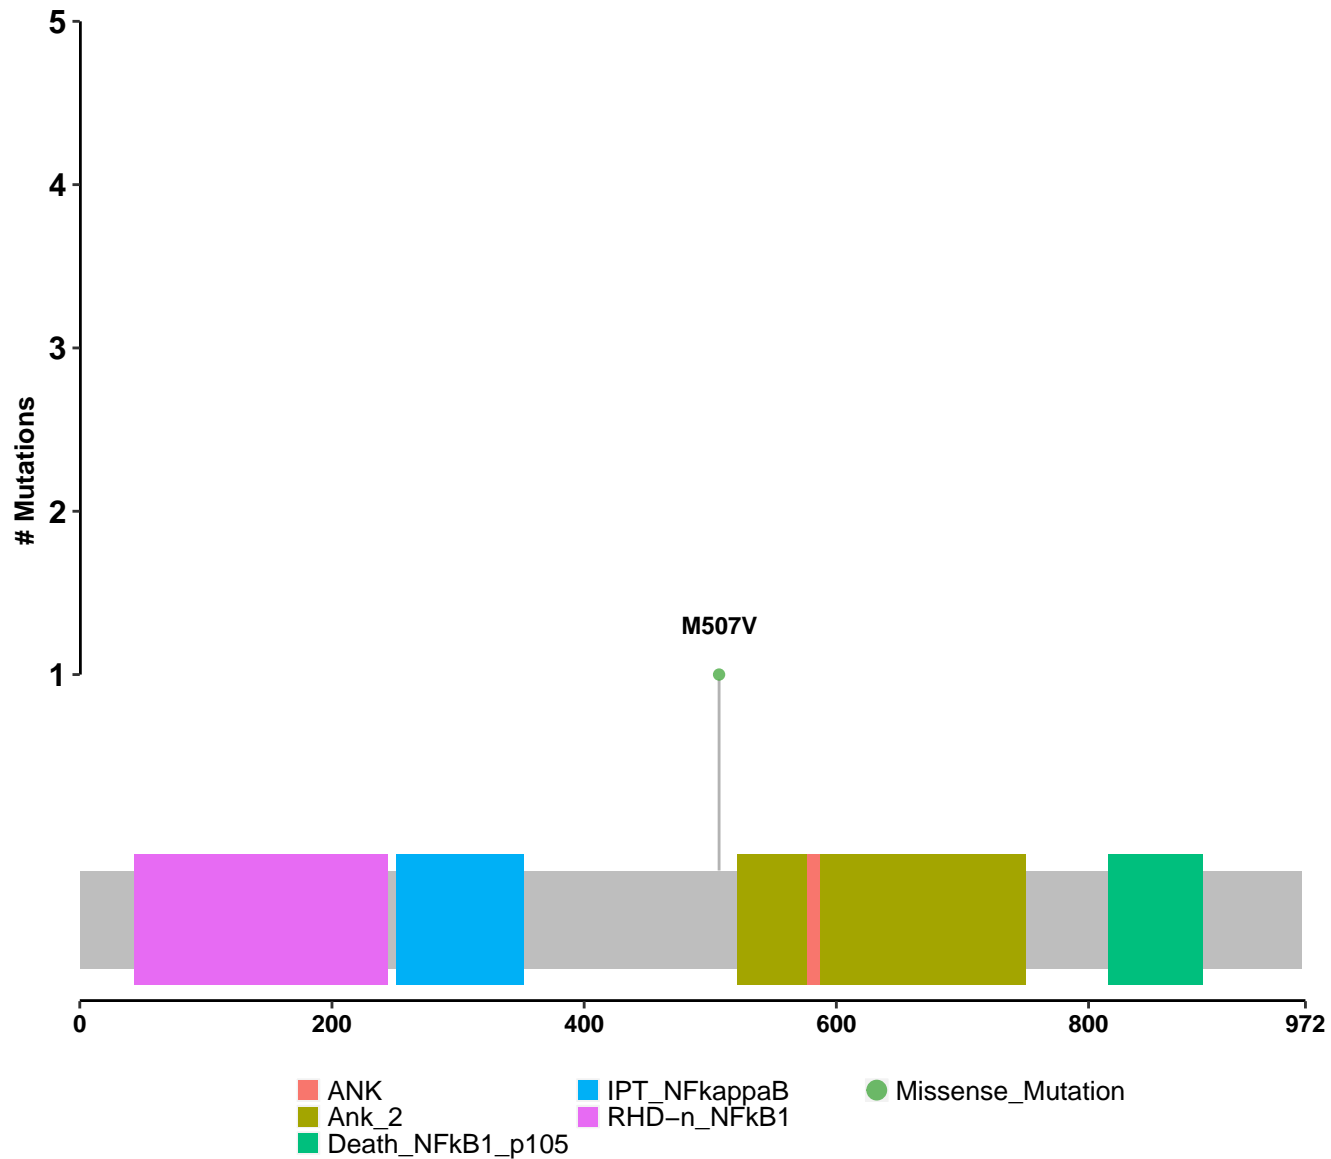



# NFKBIA: [Somatic Mutation Rate: 3.03%]

NM\_020529

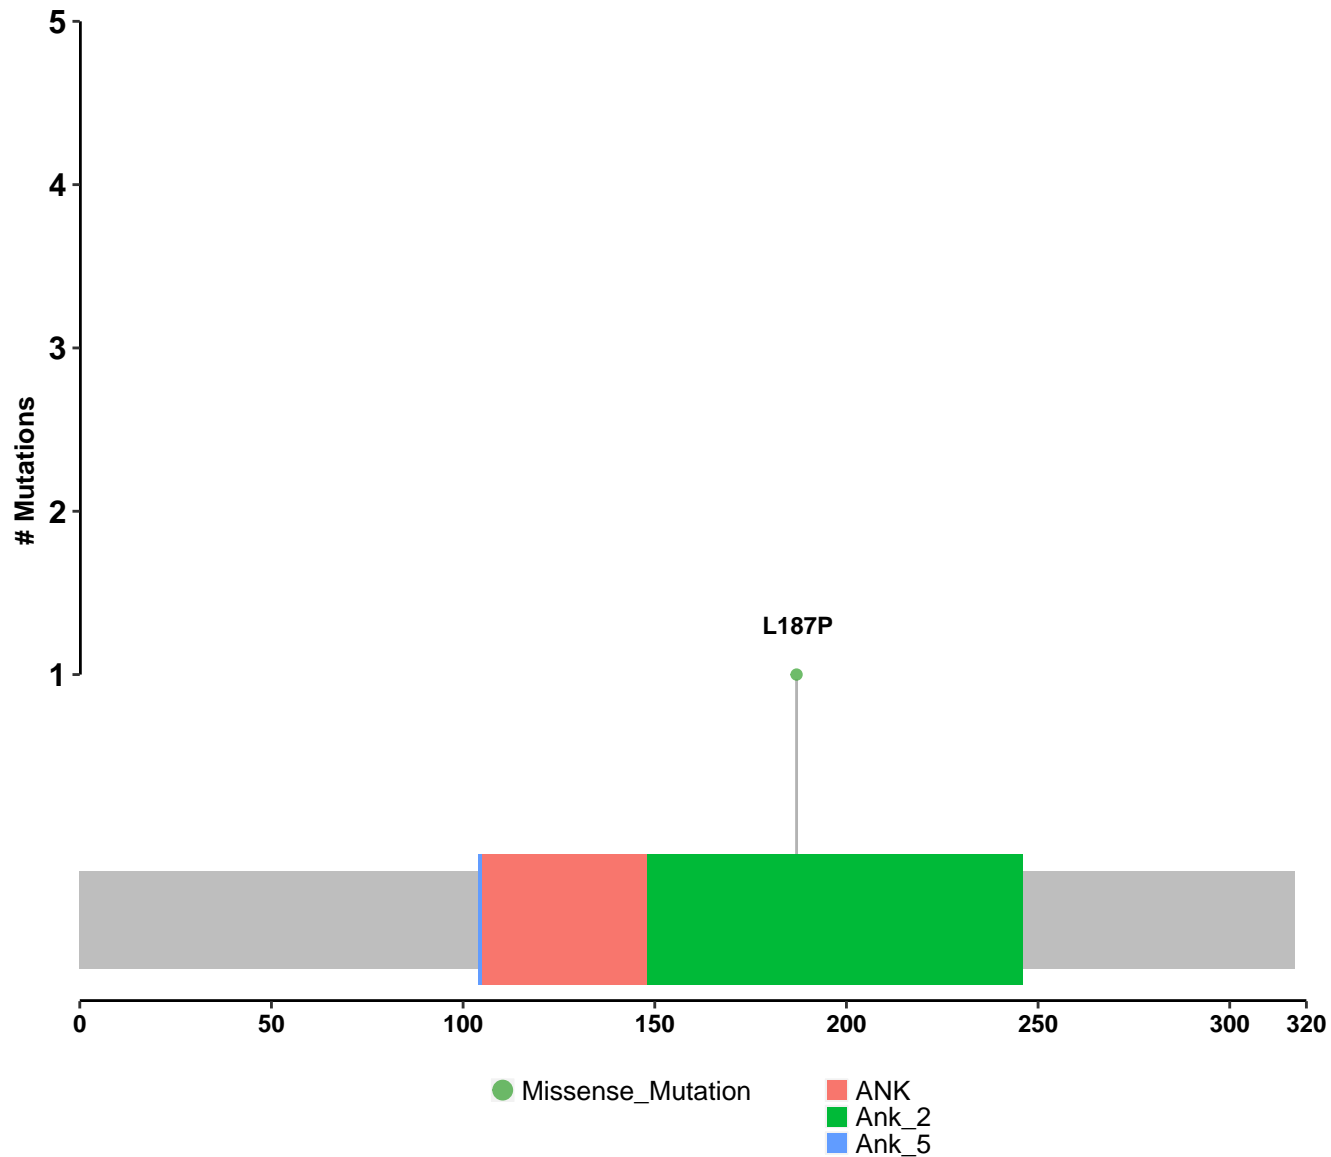

# PAX5: [Somatic Mutation Rate: 3.03%]

NM\_016734

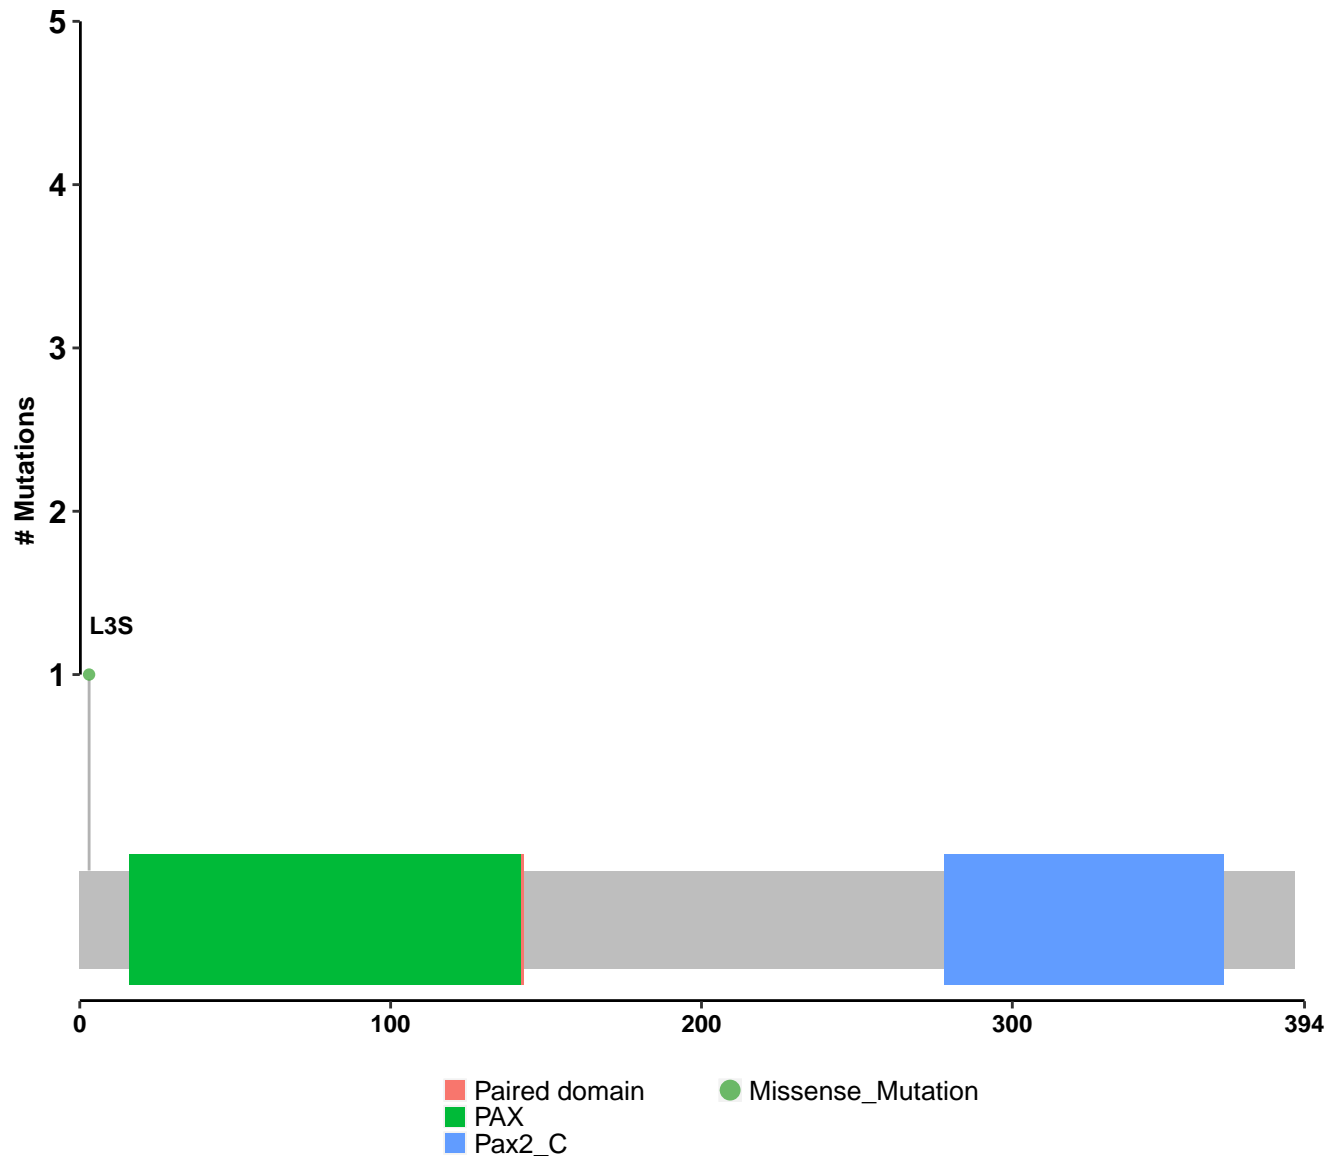

PRDM1: [Somatic Mutation Rate: 3.03%]

NM\_001198

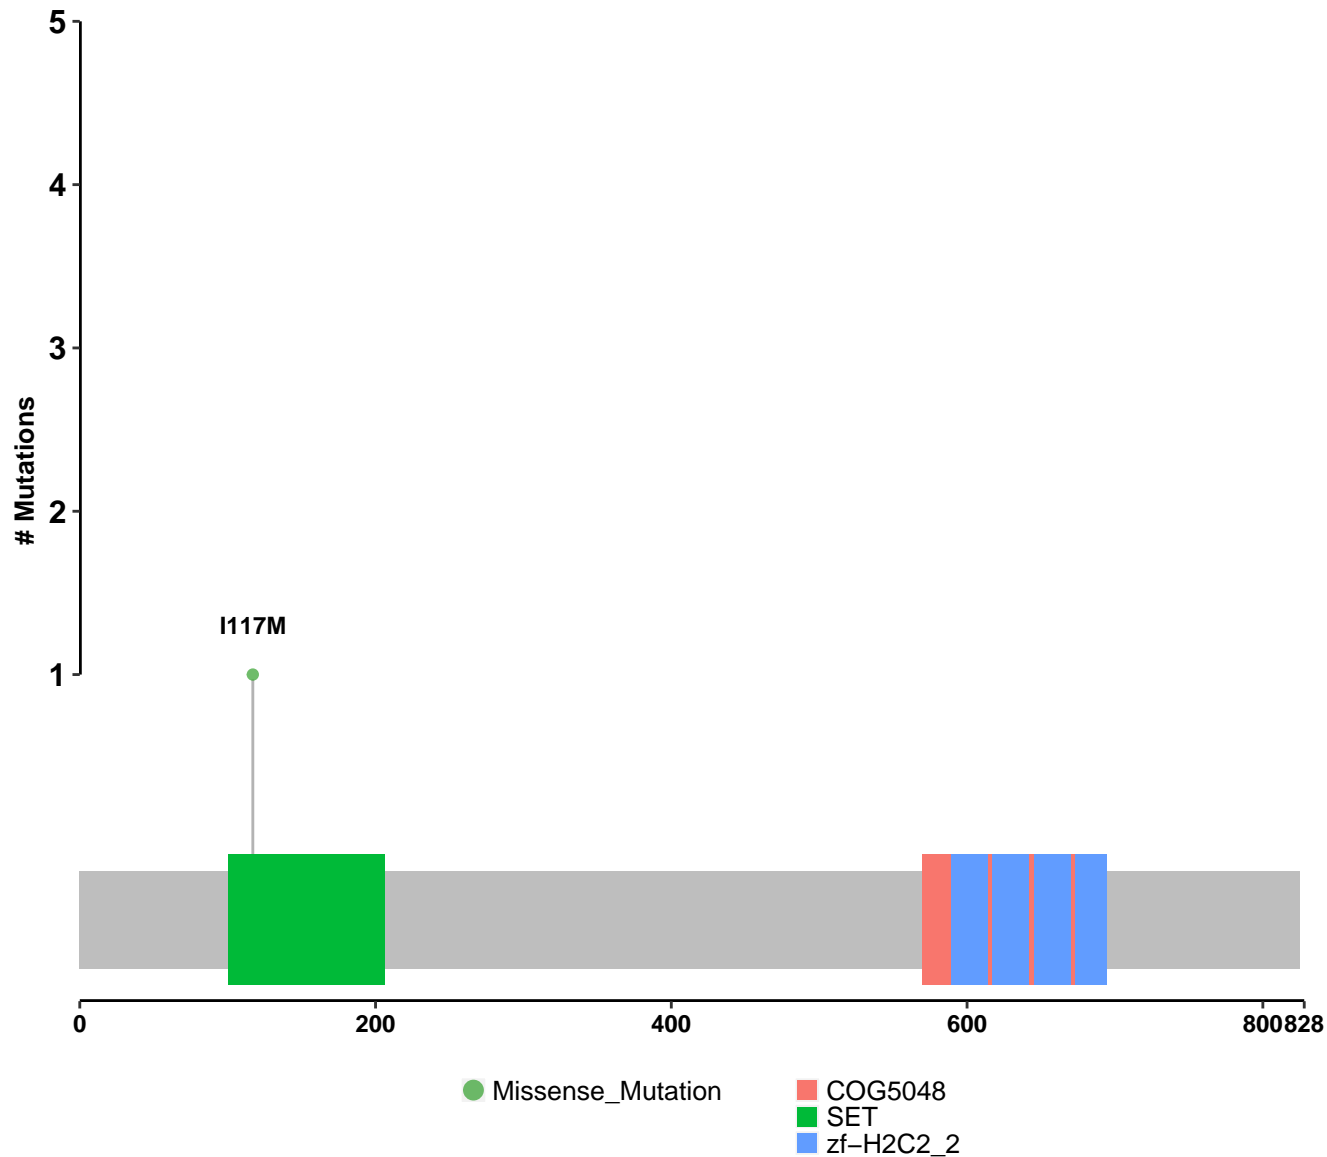

ATM: [Somatic Mutation Rate: 9.09%]

NM\_000051

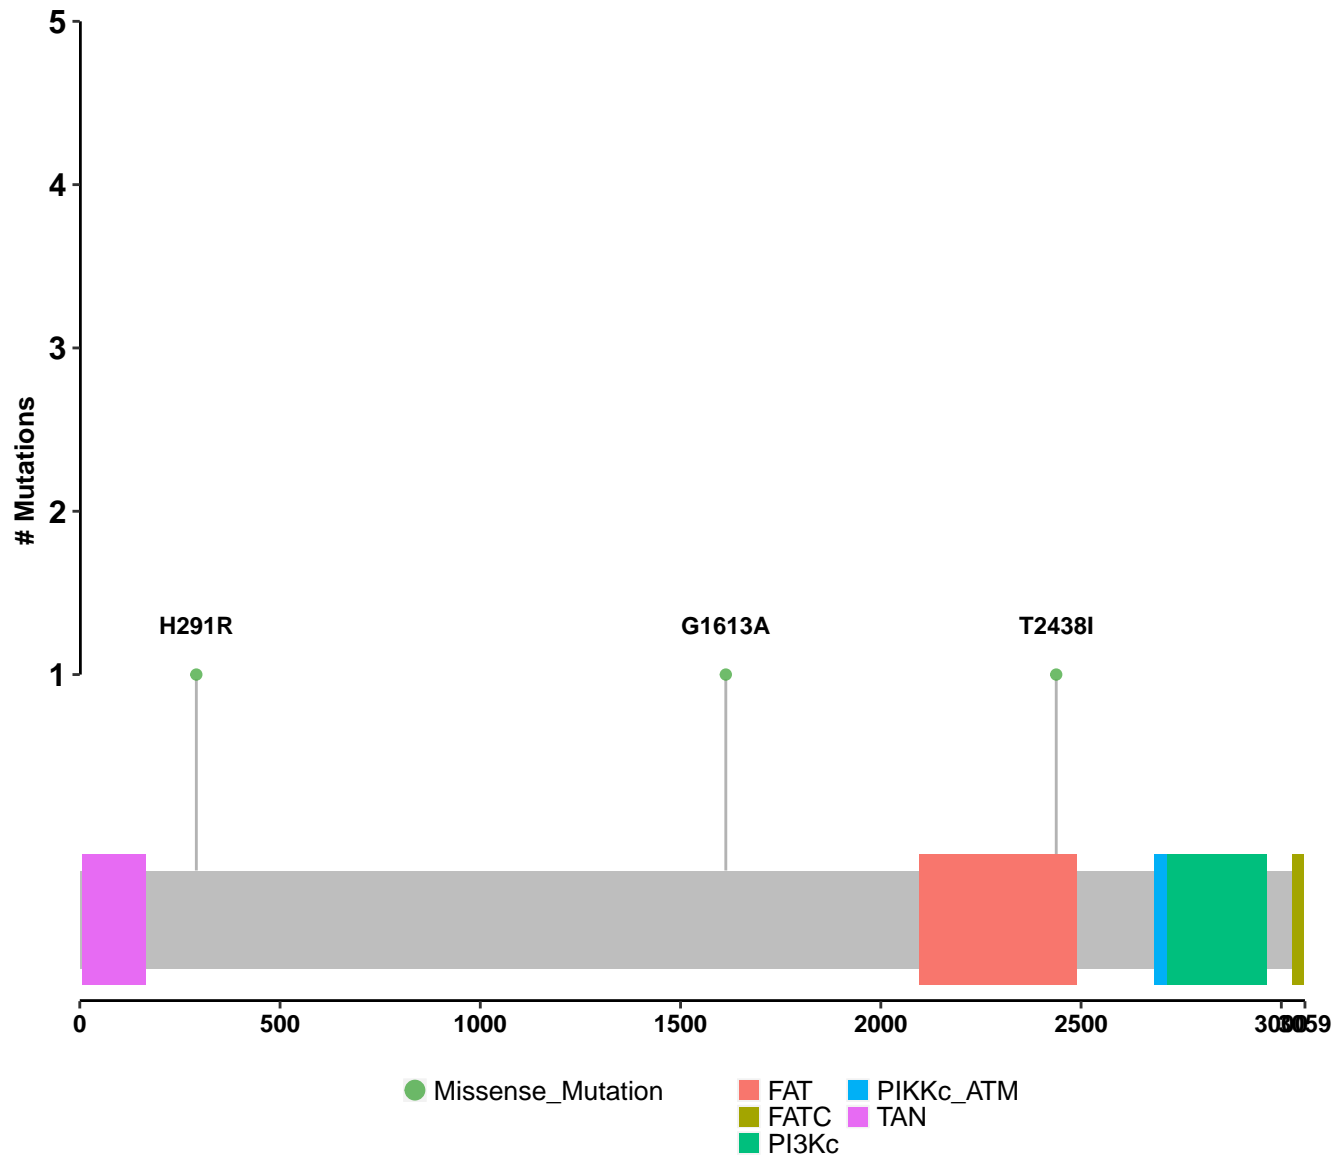

# RIPK1: [Somatic Mutation Rate: 3.03%]

NM\_003804

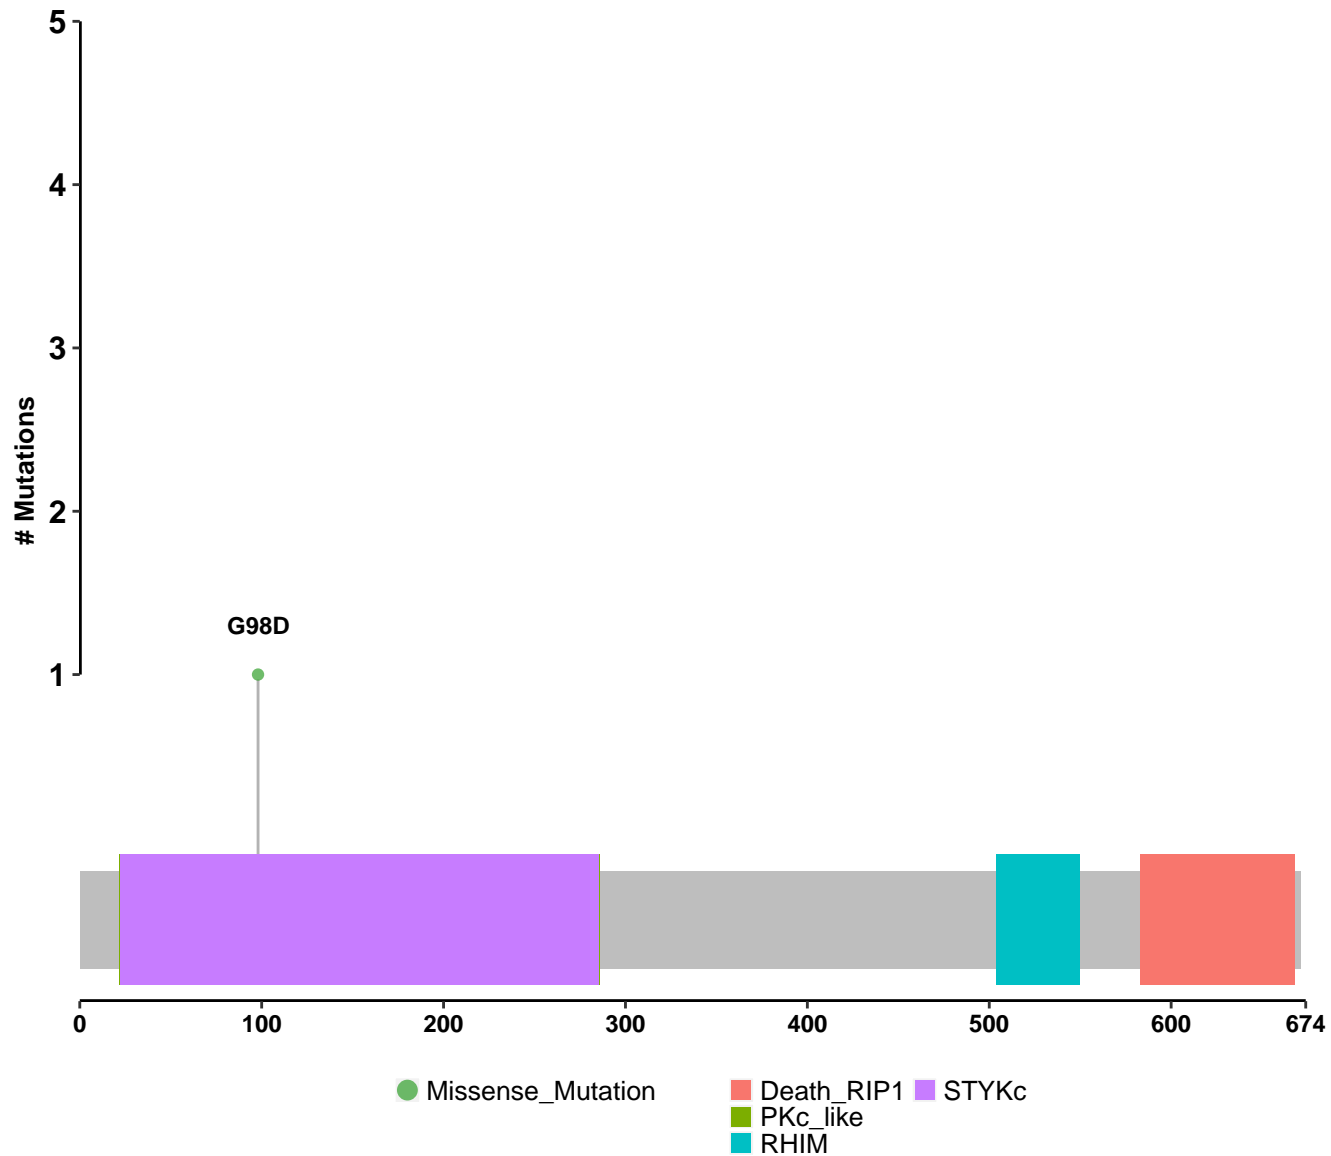

# FGFR3: [Somatic Mutation Rate: 12.12%]

NM\_001163213

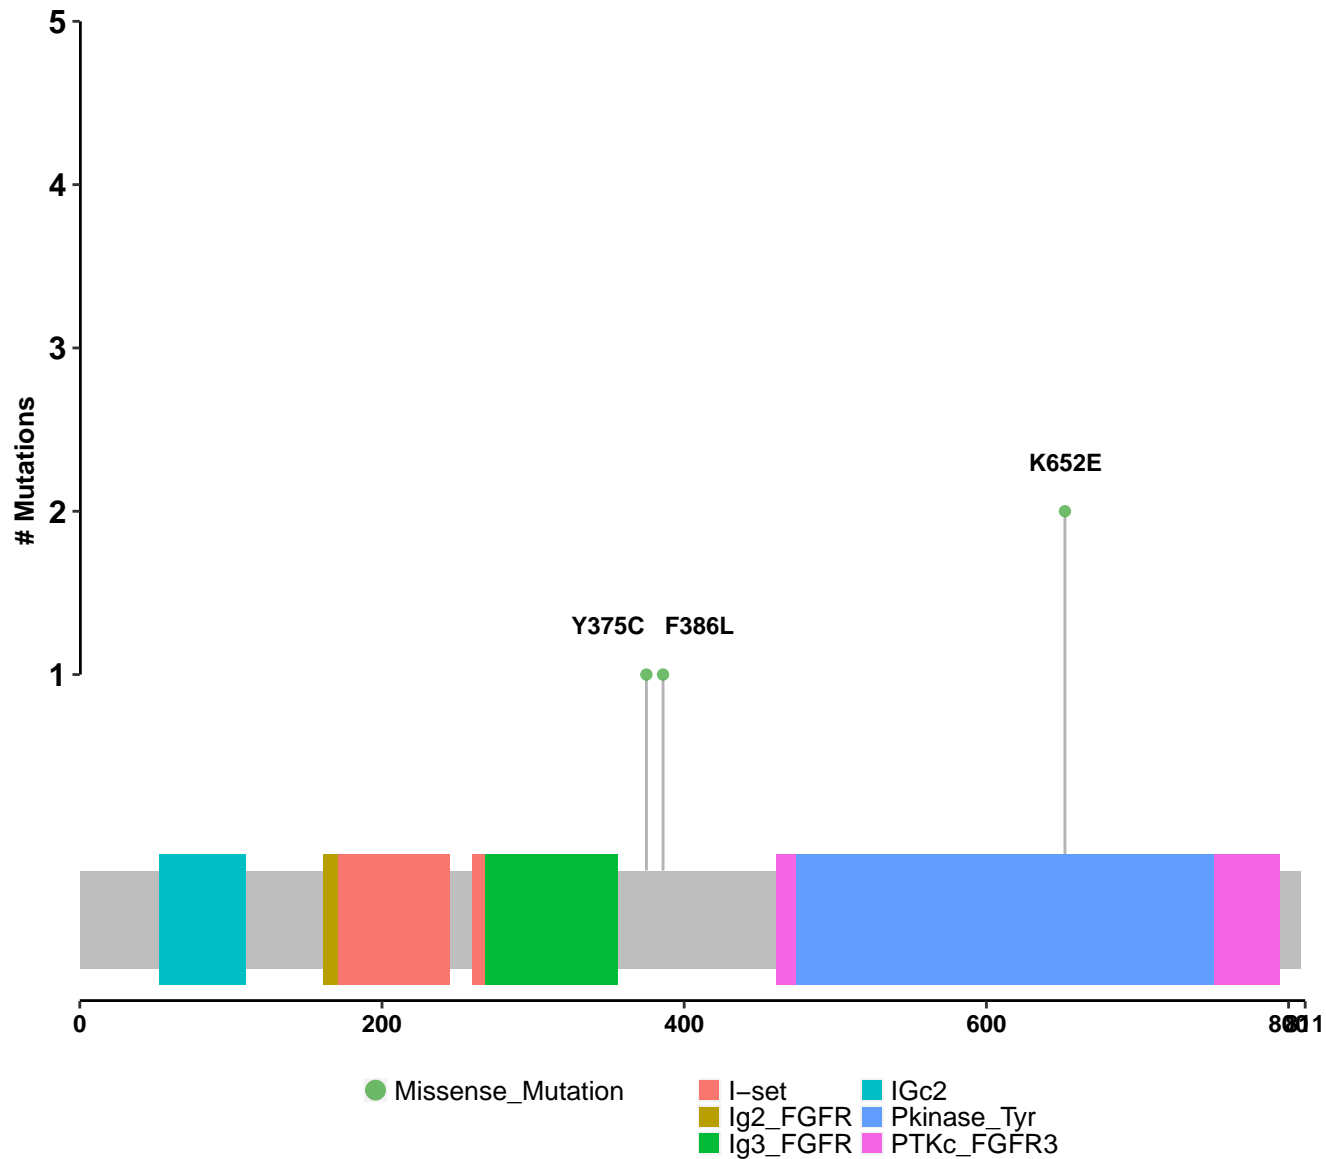

# PRKD2: [Somatic Mutation Rate: 18.18%]

NM\_001079880

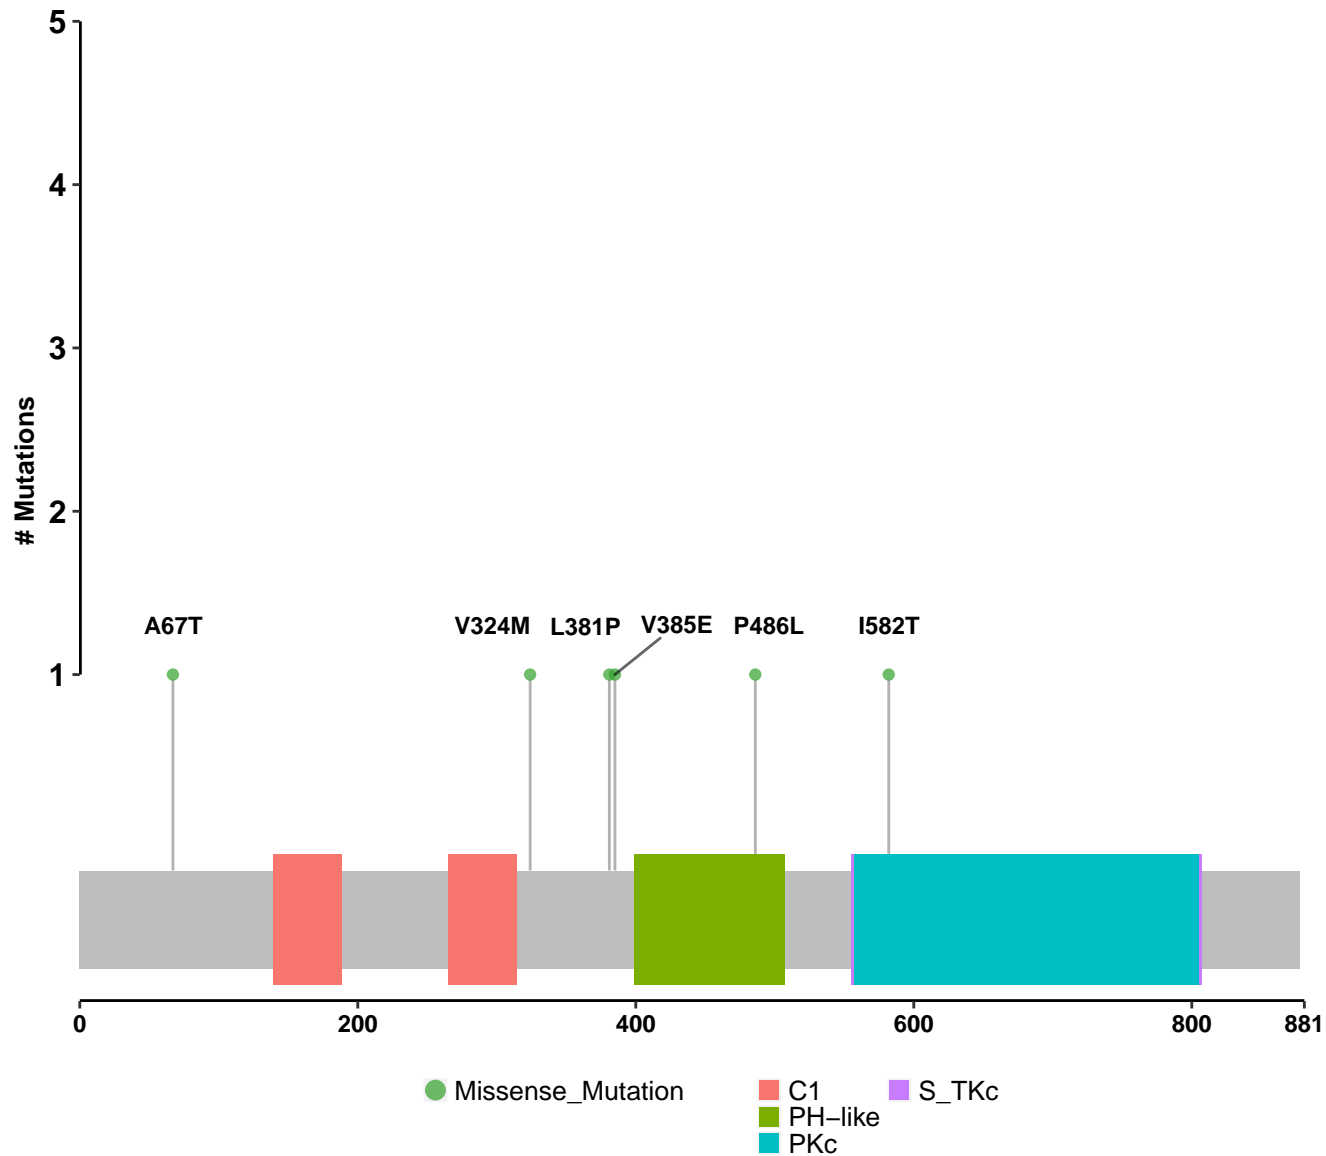

# SP140: [Somatic Mutation Rate: 12.12%]

NM\_007237

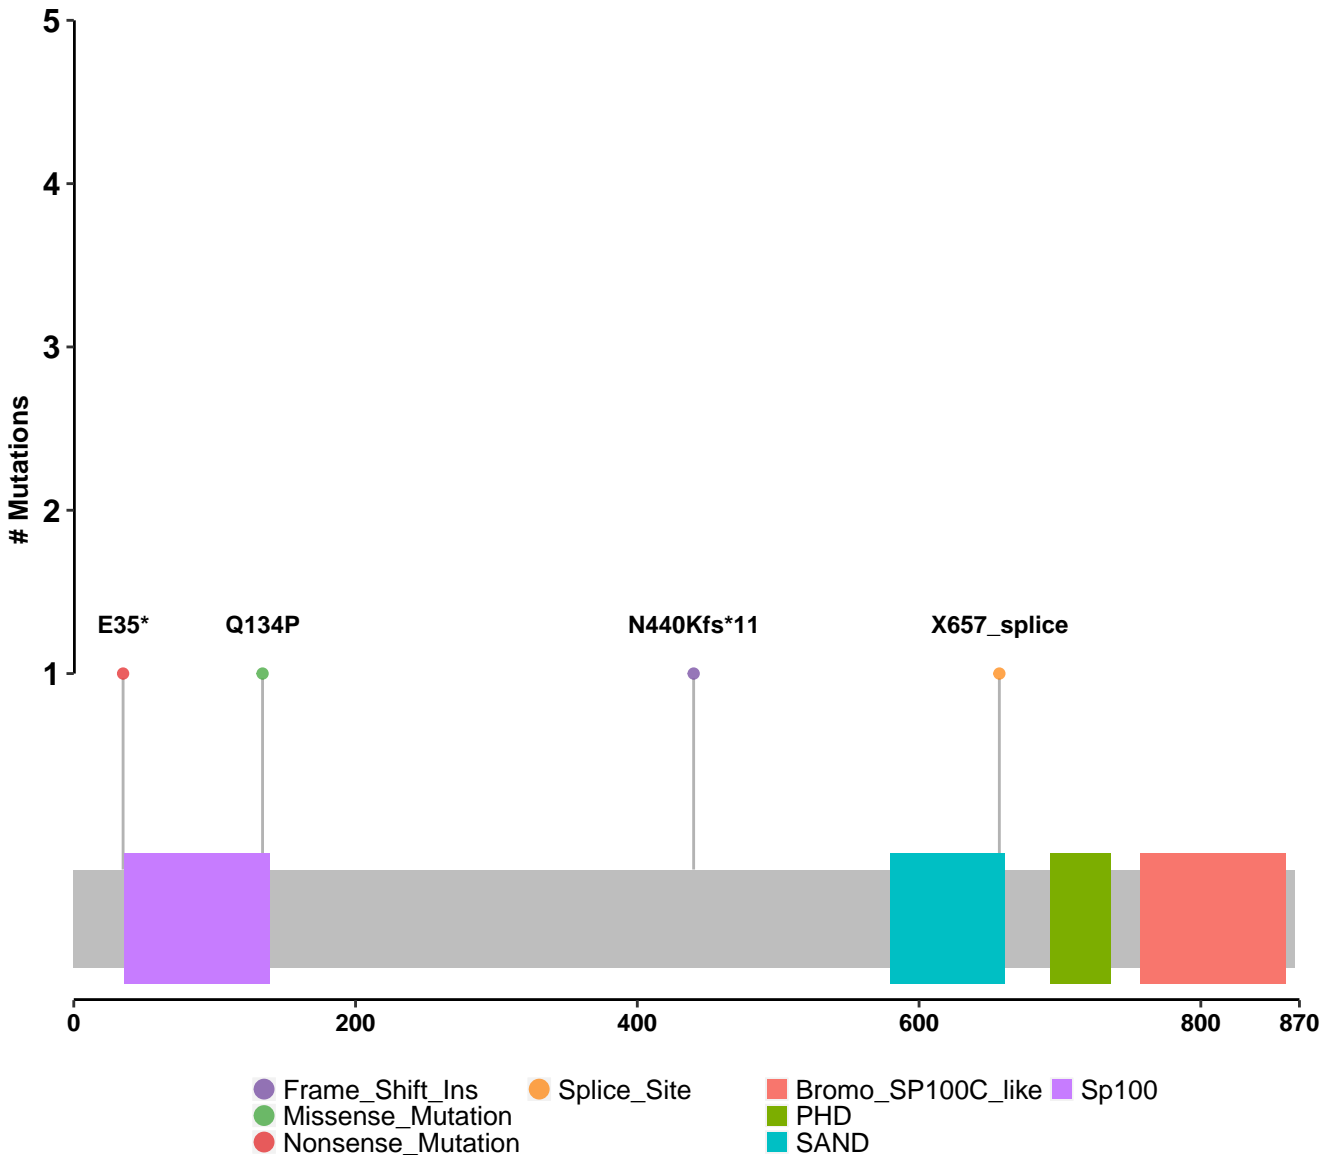



# APAF1: [Somatic Mutation Rate: 15.15%]

NM\_181861

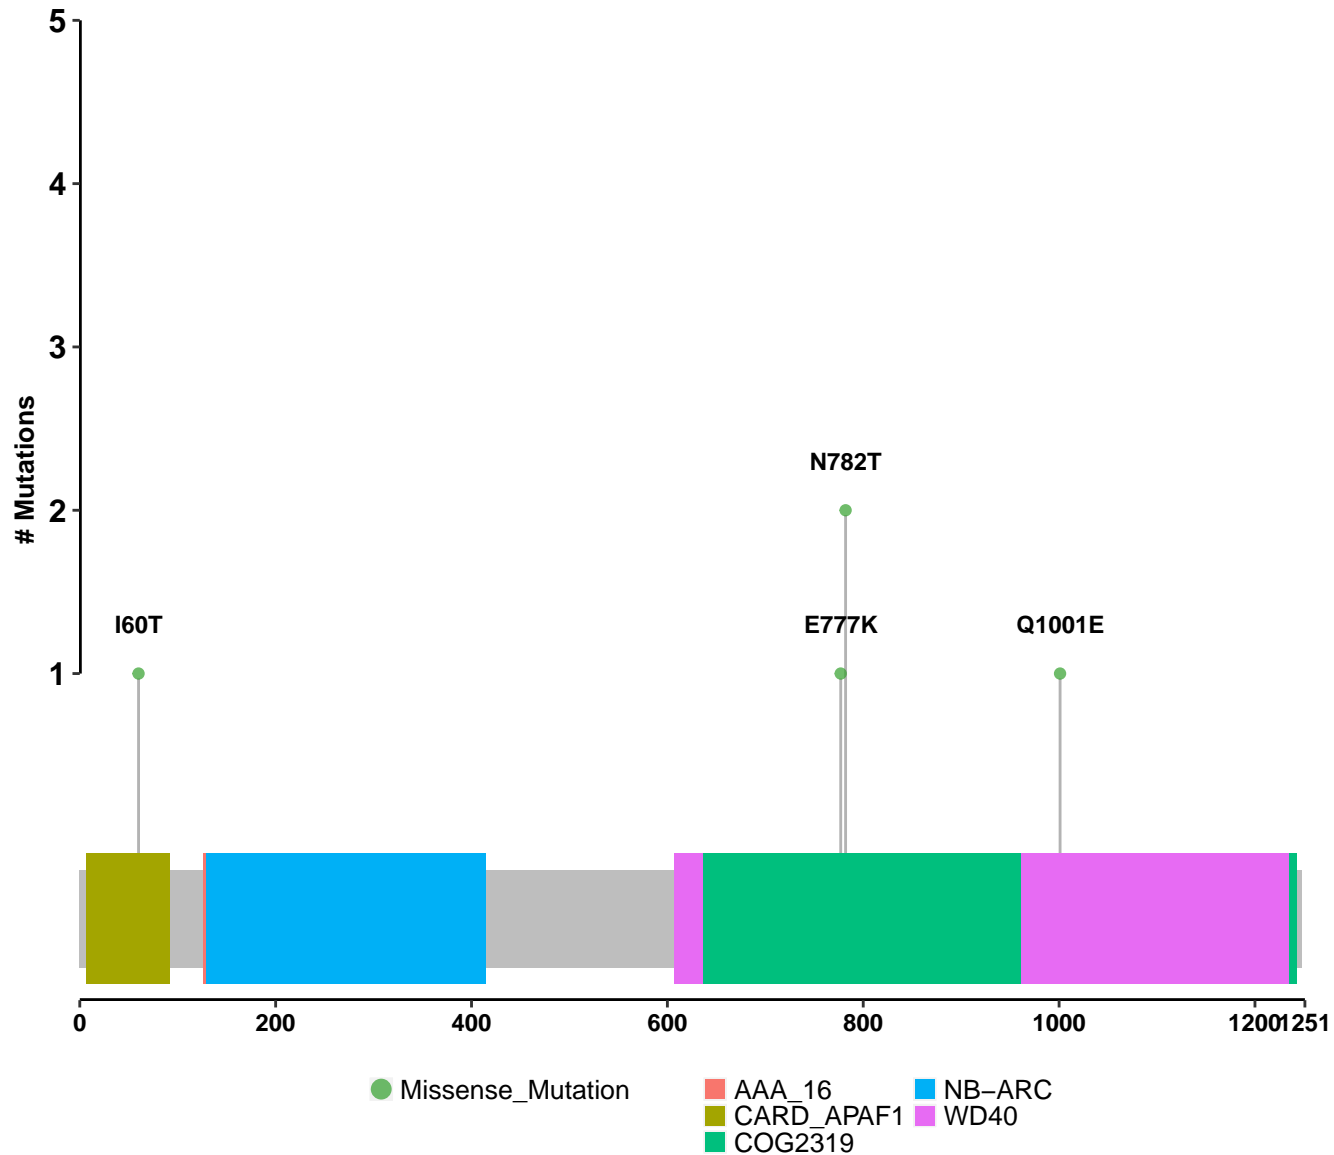

# IFNAR1: [Somatic Mutation Rate: 6.06%]

NM\_000629

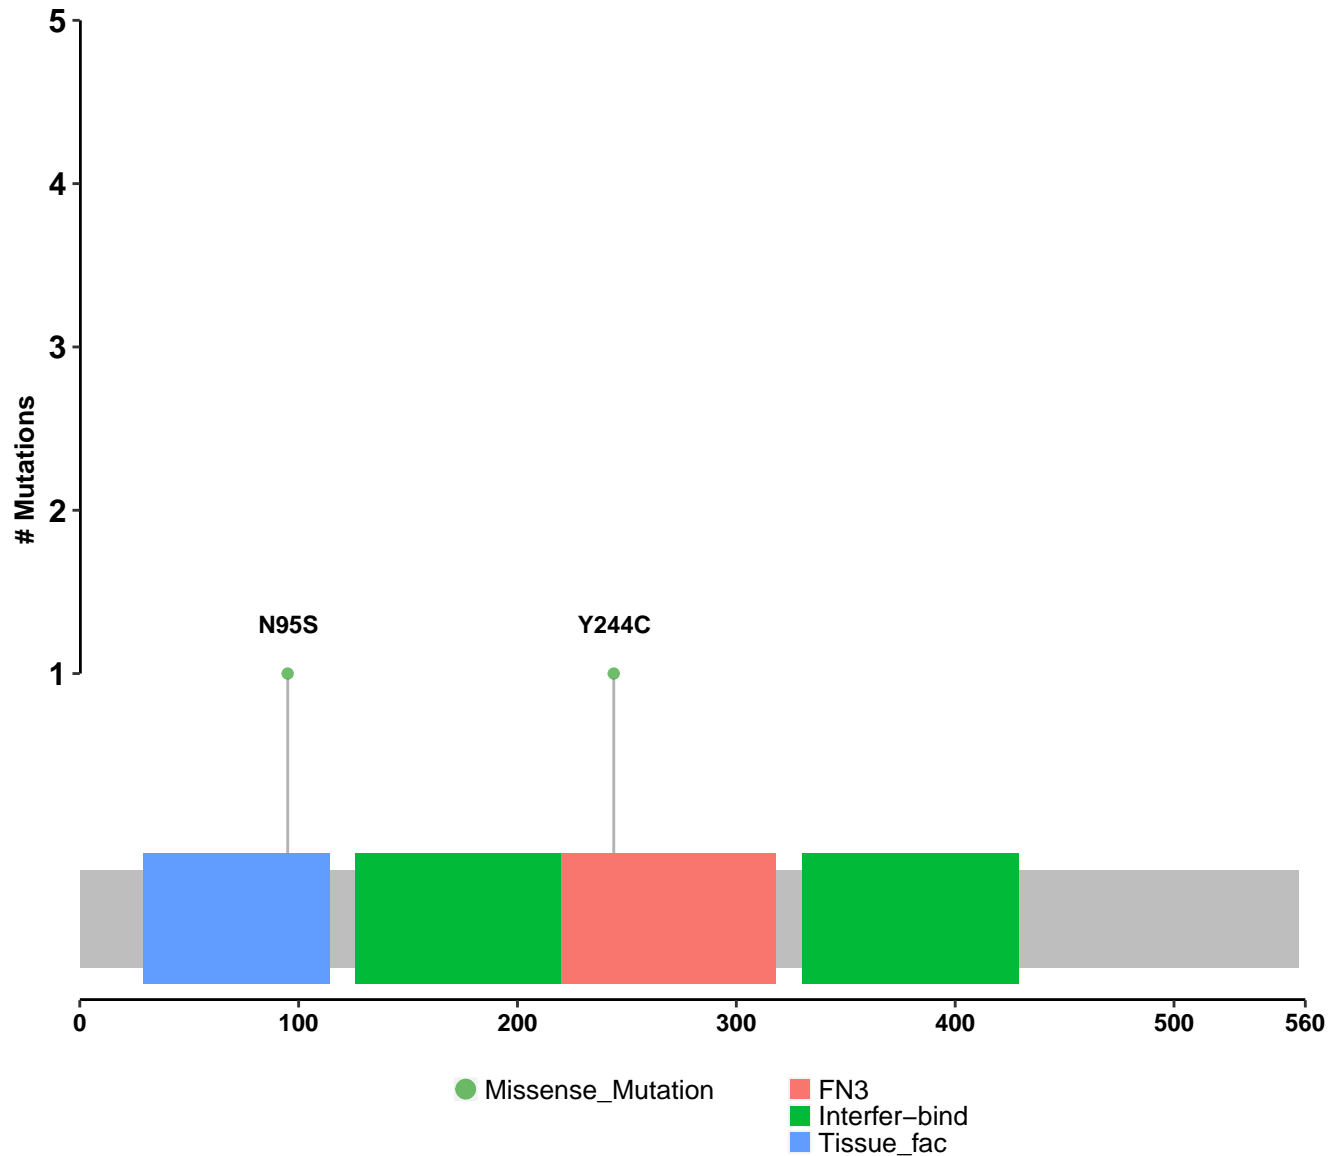

# RPA1: [Somatic Mutation Rate: 3.03%]

NM\_002945

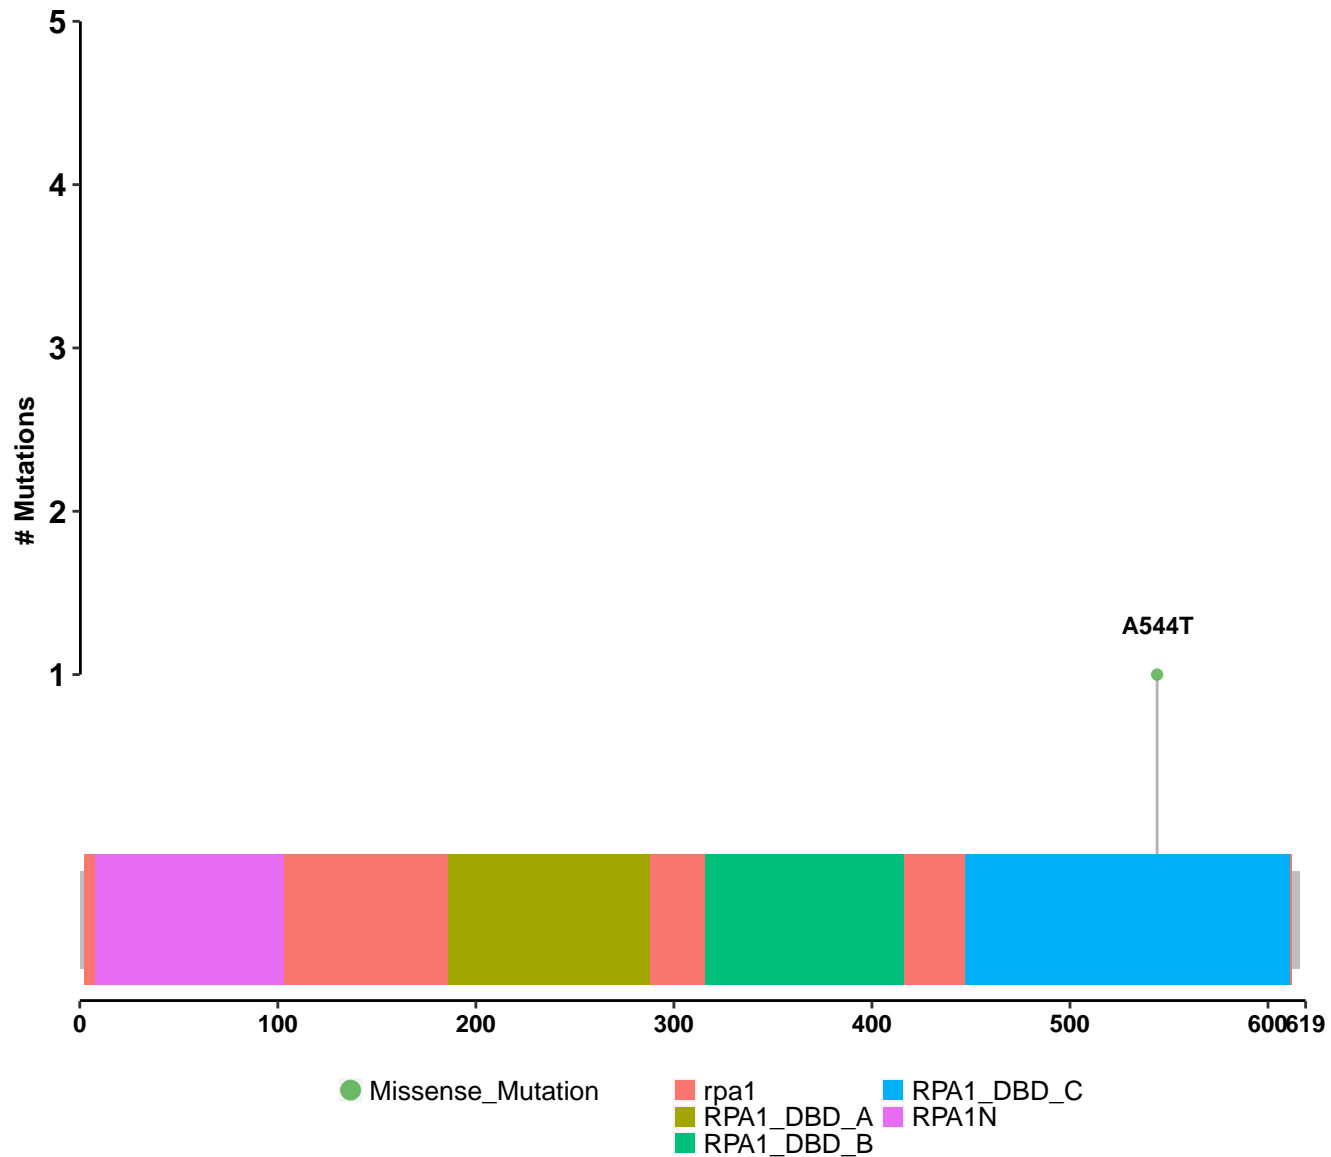

# RPA2: [Somatic Mutation Rate: 3.03%]

NM\_002946

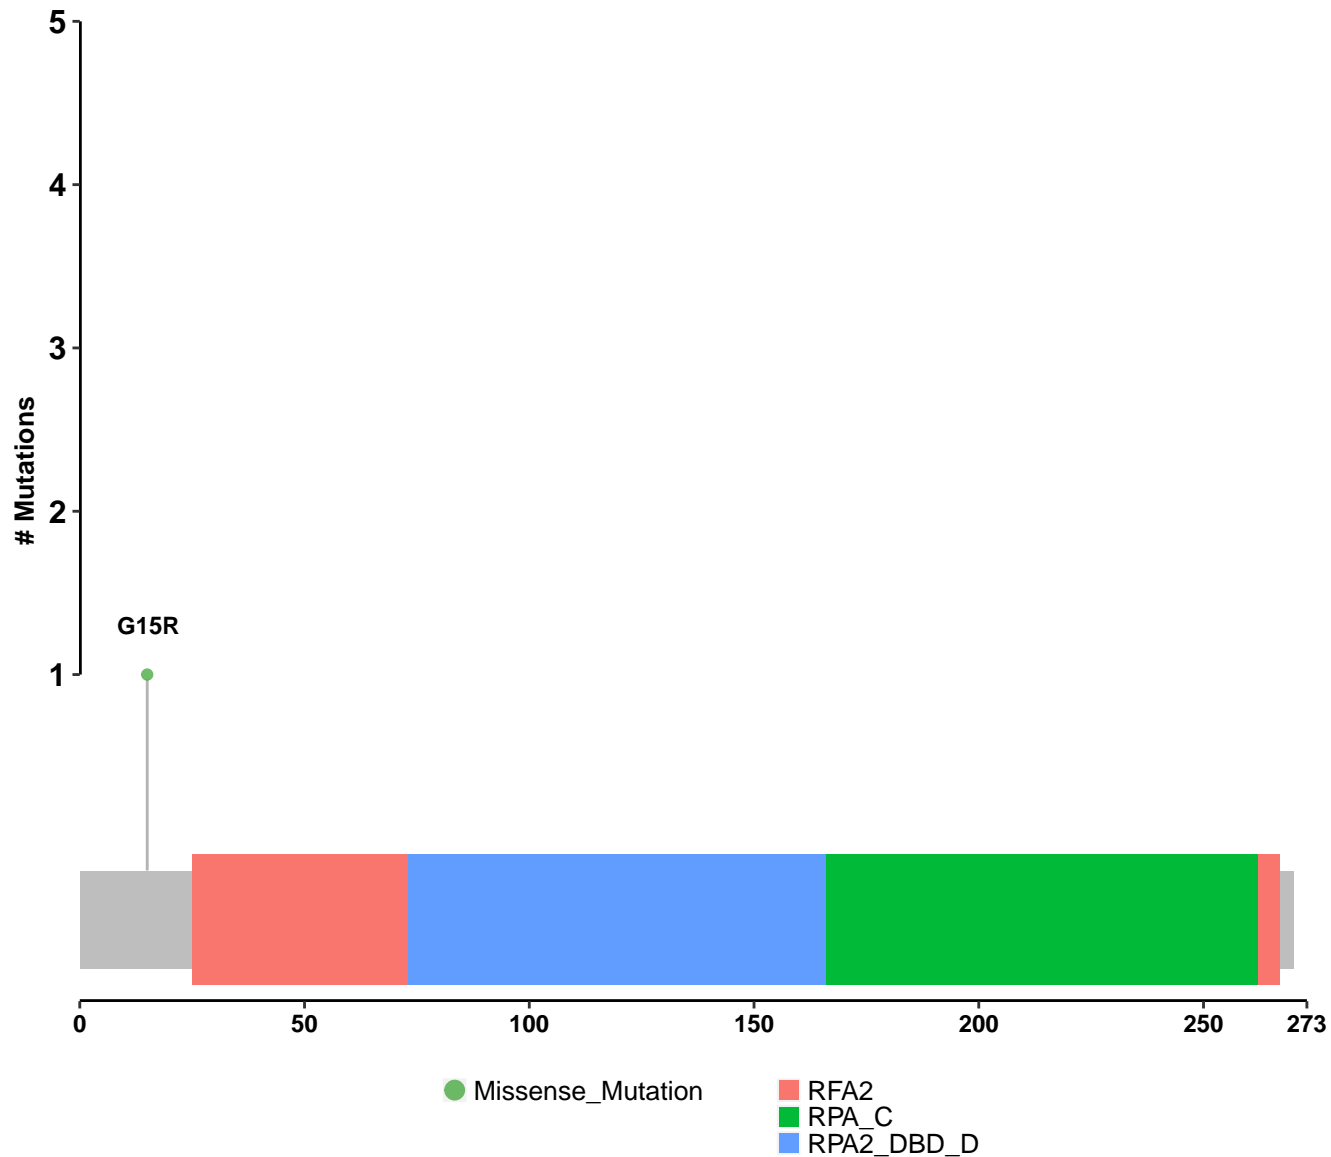

# RPA3: [Somatic Mutation Rate: 3.03%]

NM\_002947

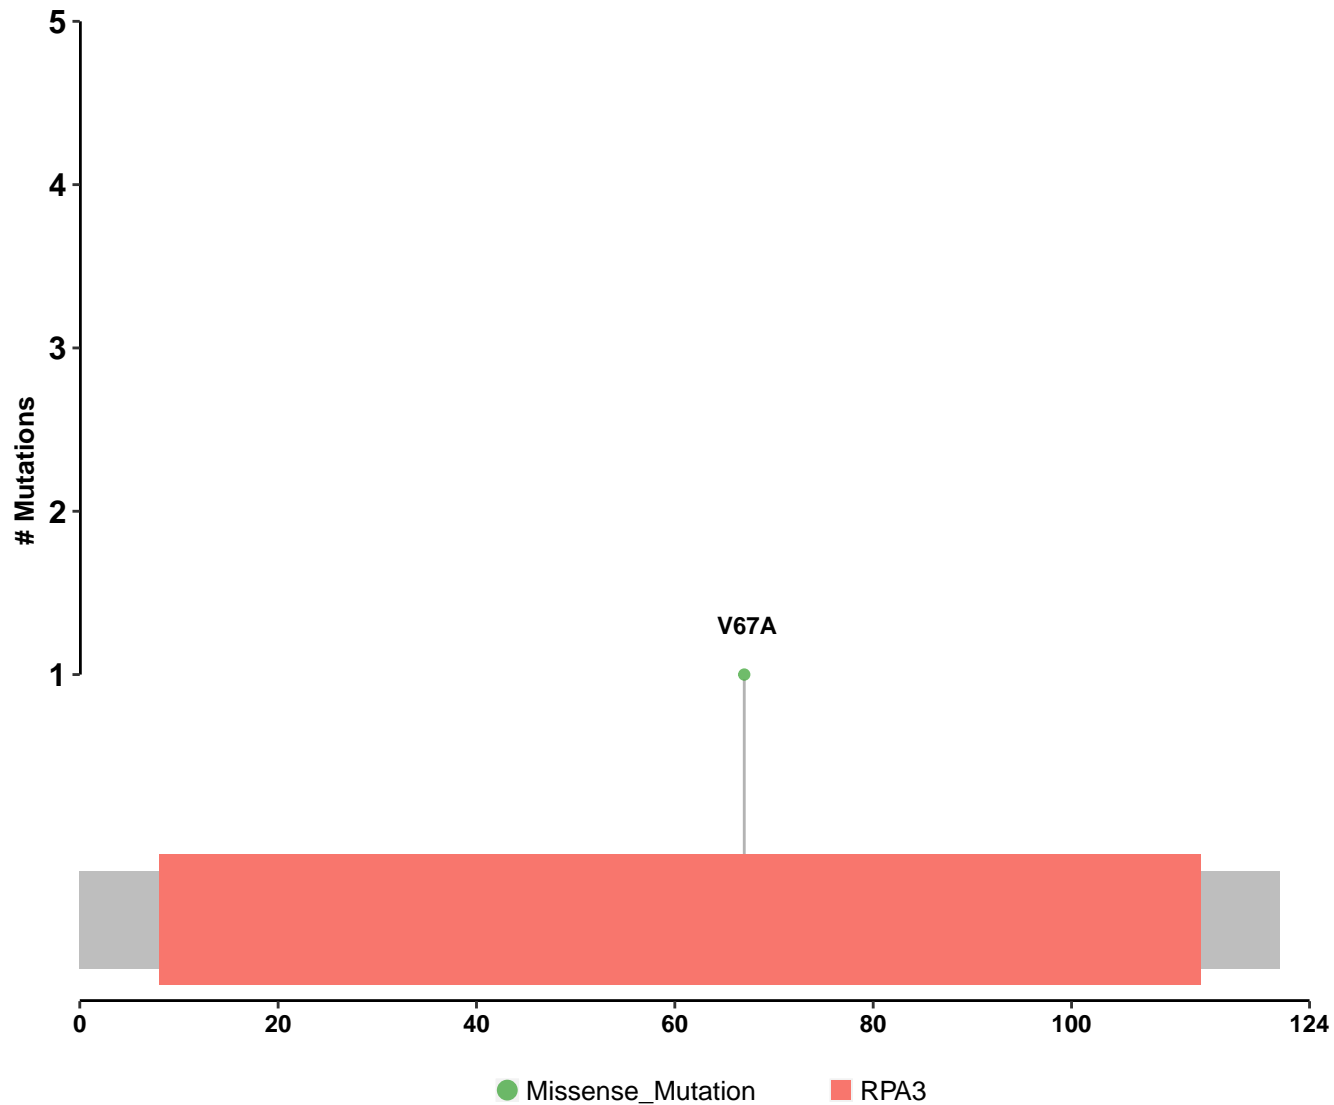

# TNFRSF10A: [Somatic Mutation Rate: 3.03%]

NM\_003844

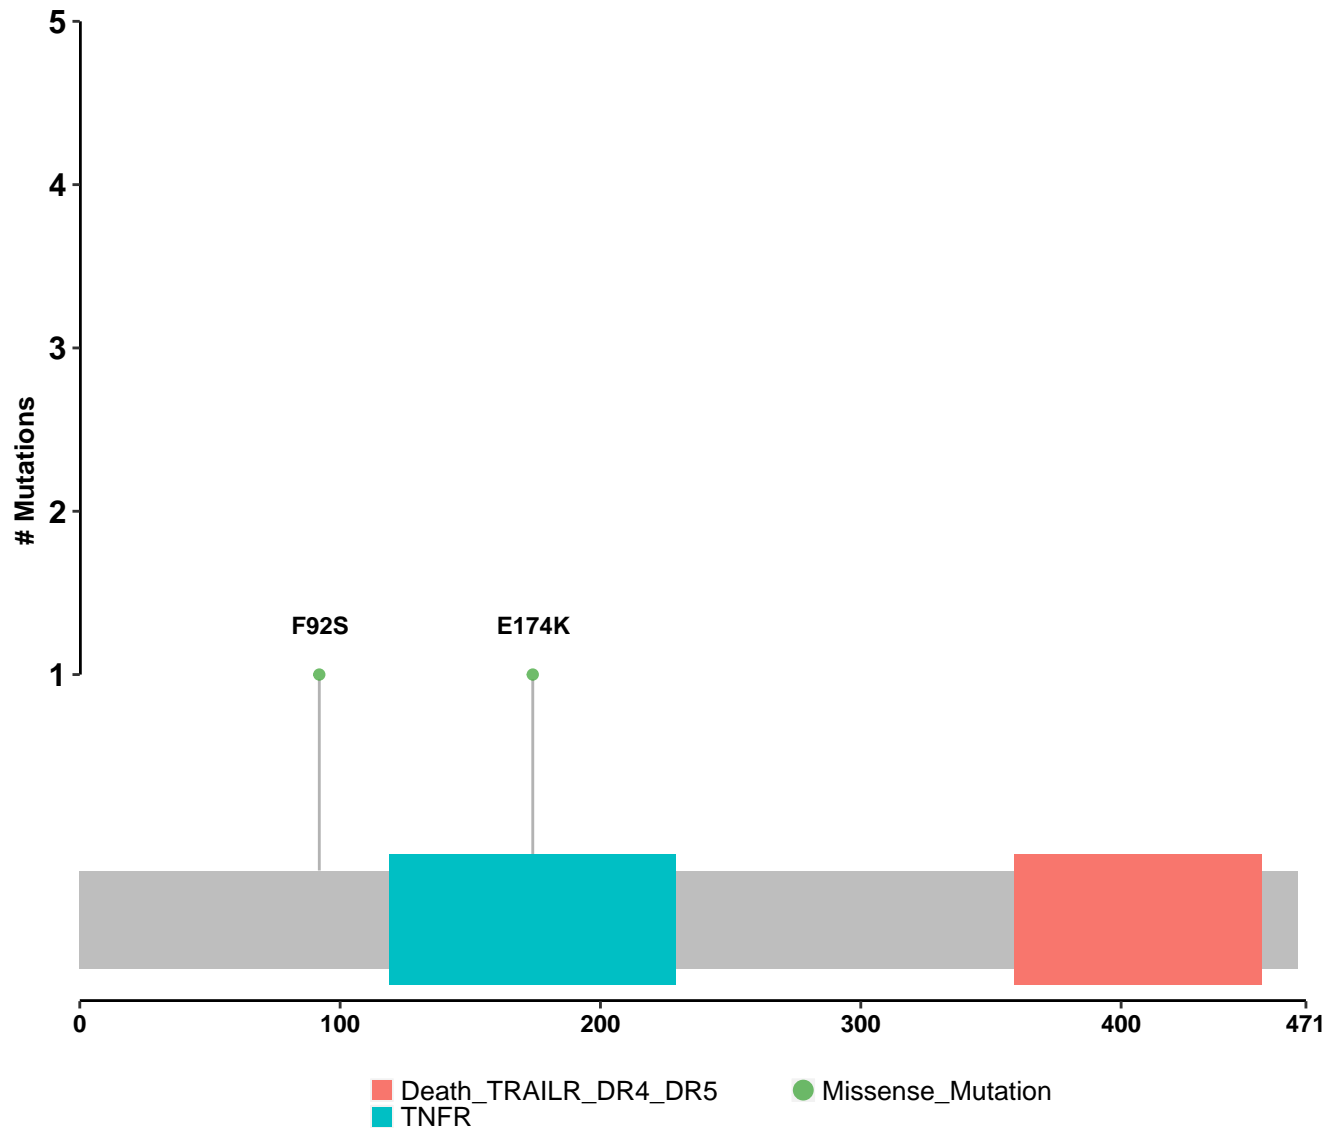

# TNFSF10: [Somatic Mutation Rate: 3.03%]

NM\_003810

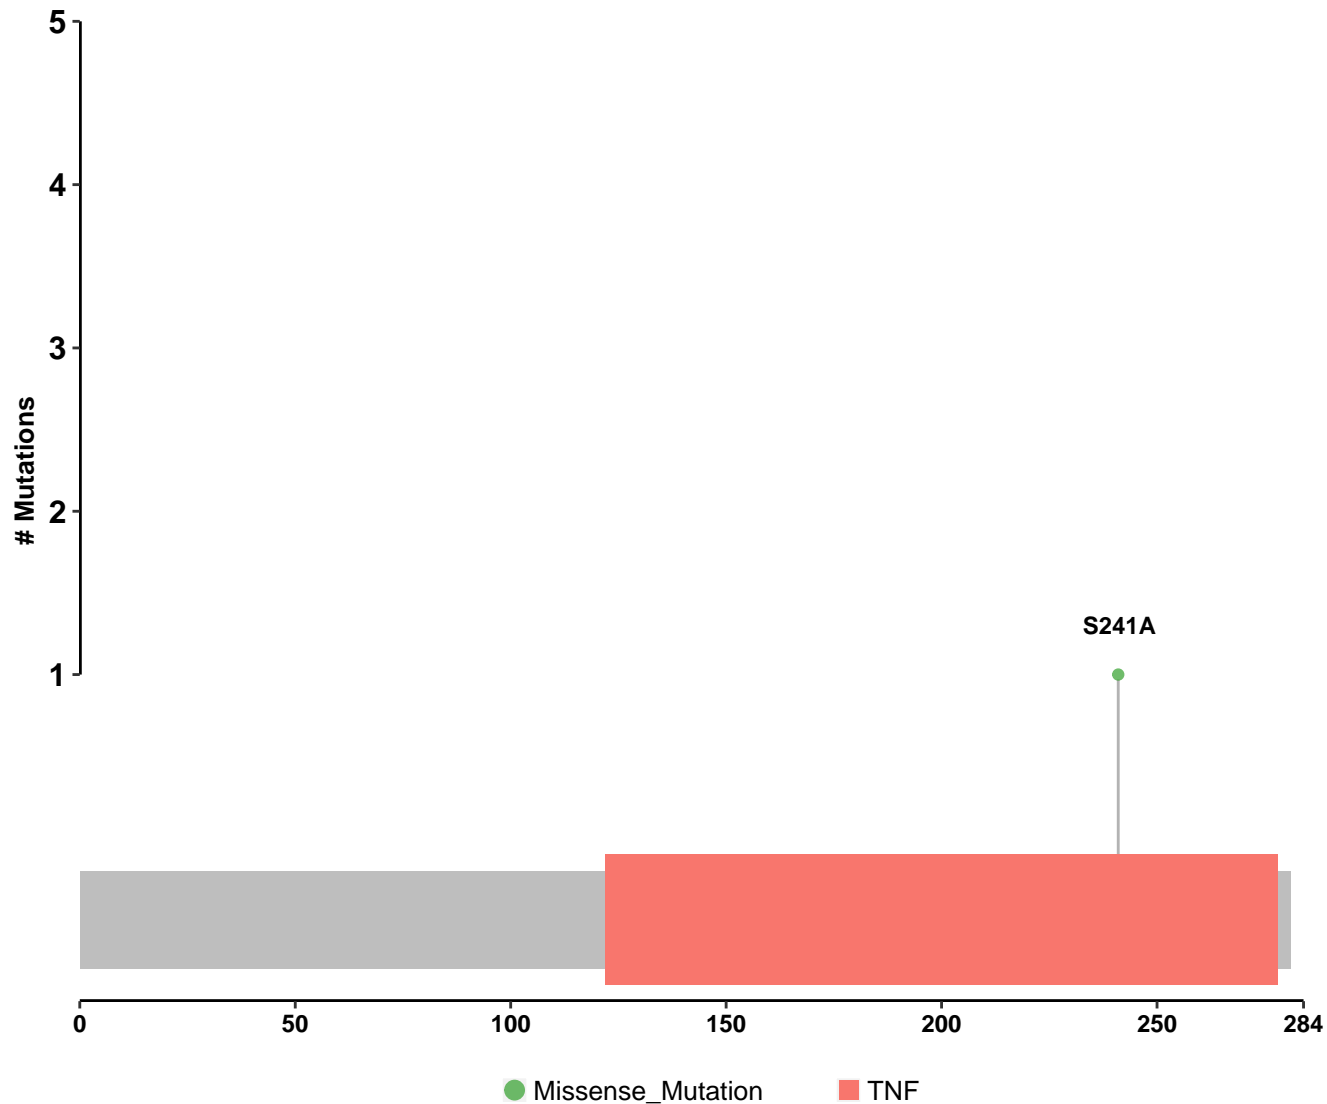

# USP10: [Somatic Mutation Rate: 3.03%]

NM\_005153

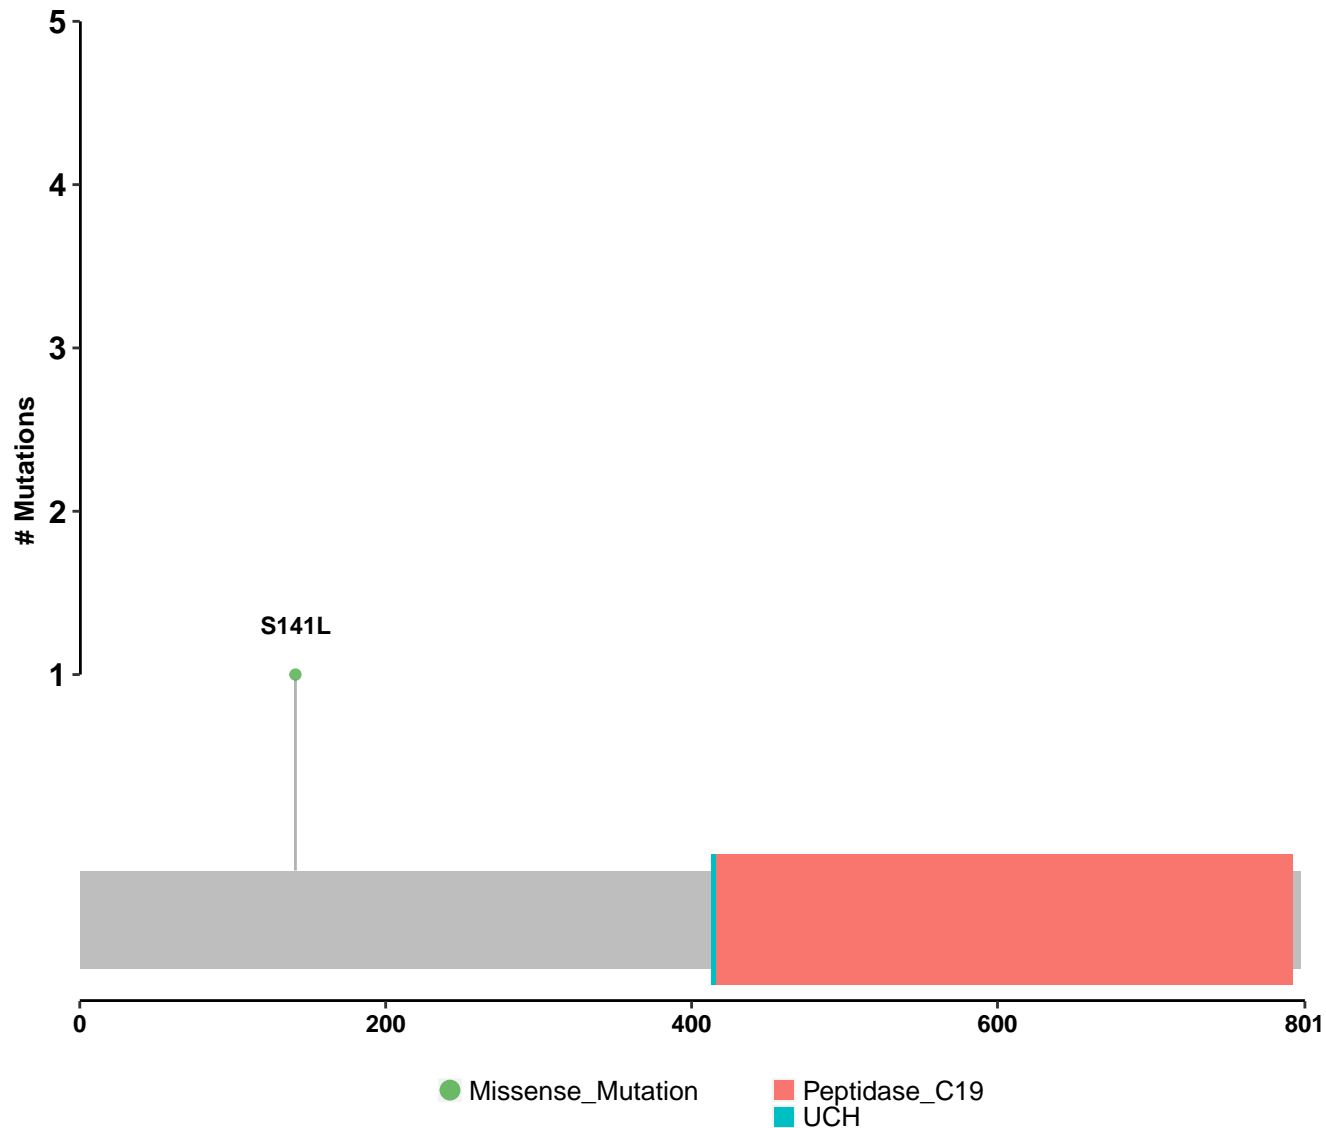



# XBP1: [Somatic Mutation Rate: 3.03%]

NM\_001079539

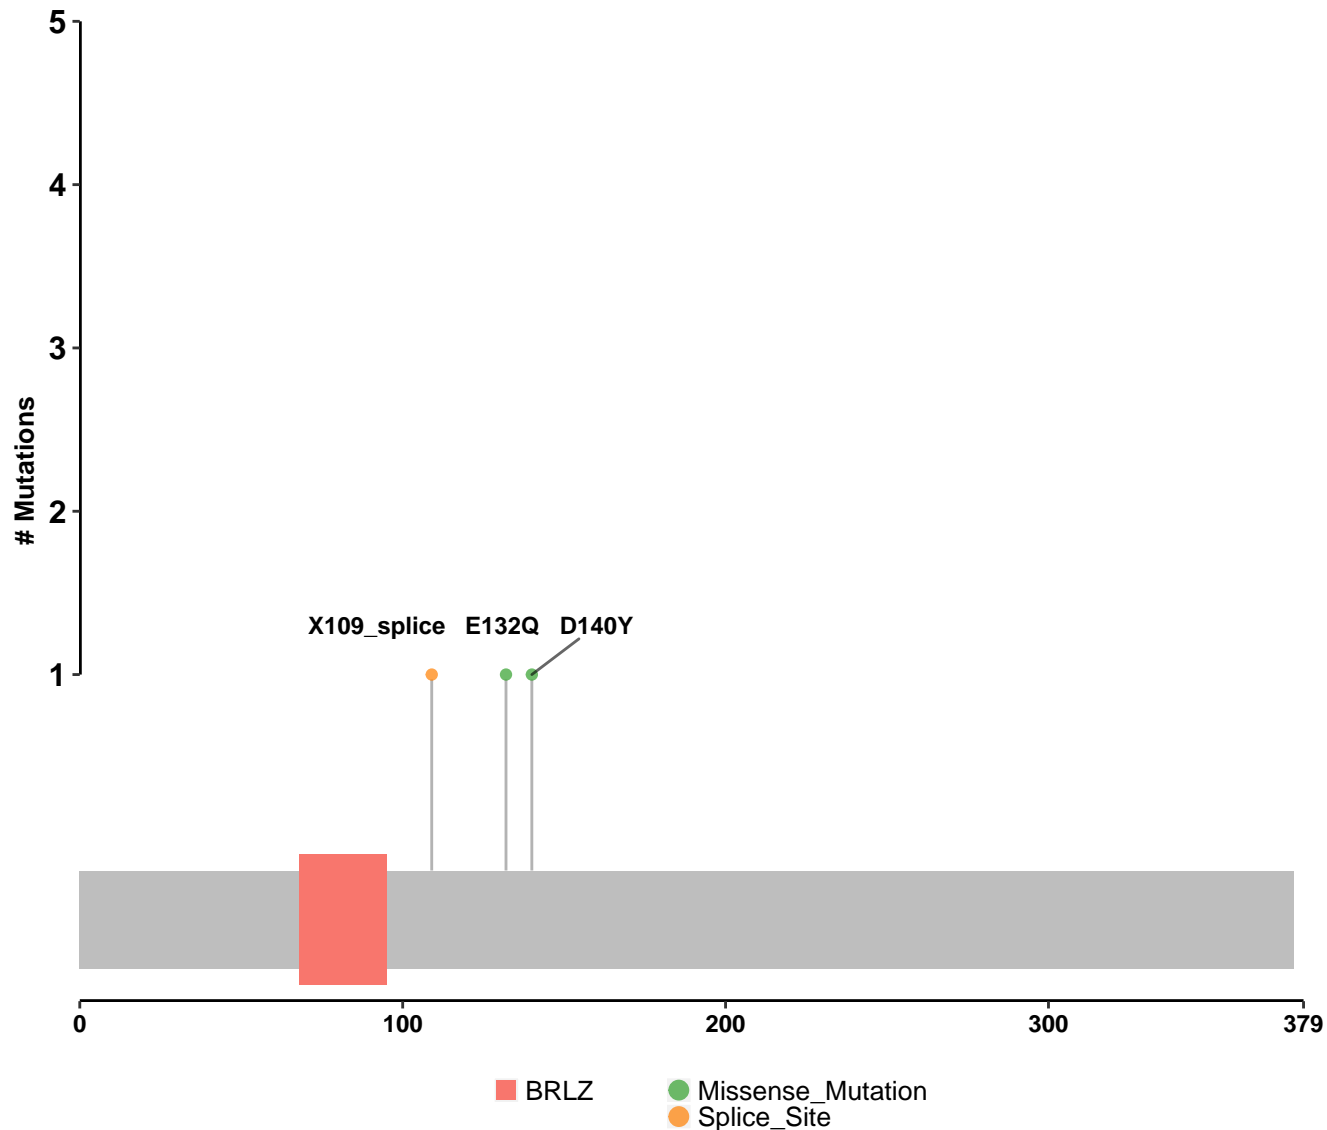

# XRCC1: [Somatic Mutation Rate: 3.03%]

NM\_006297

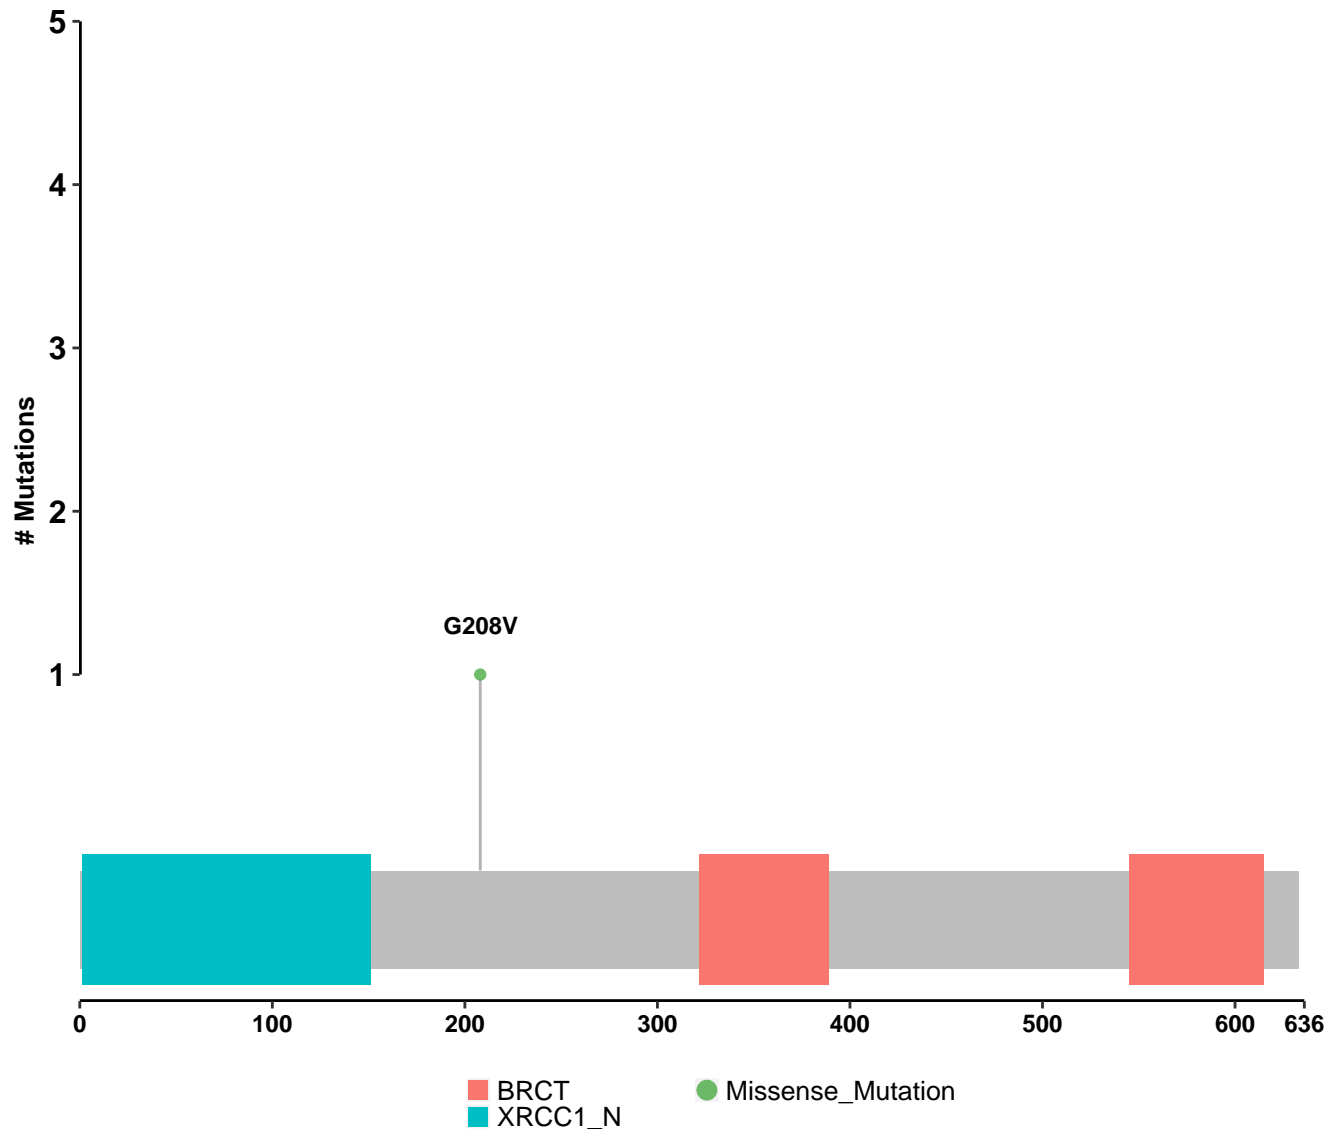

# BRIP1: [Somatic Mutation Rate: 6.06%]

NM\_032043

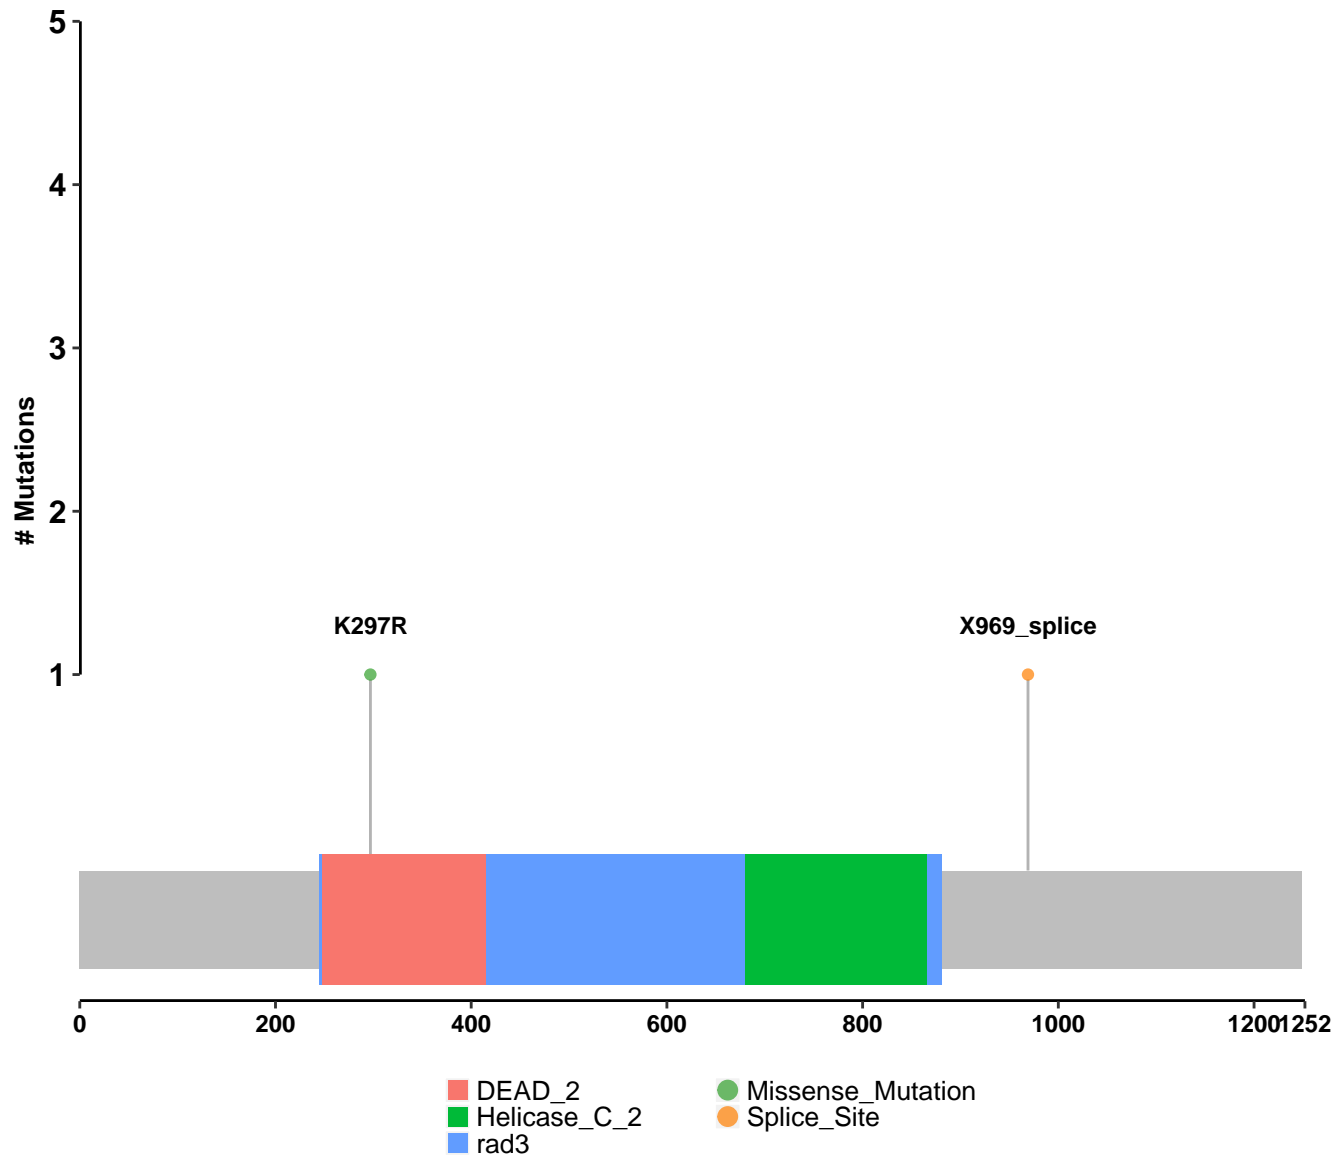

# TP73: [Somatic Mutation Rate: 3.03%]

NM\_005427

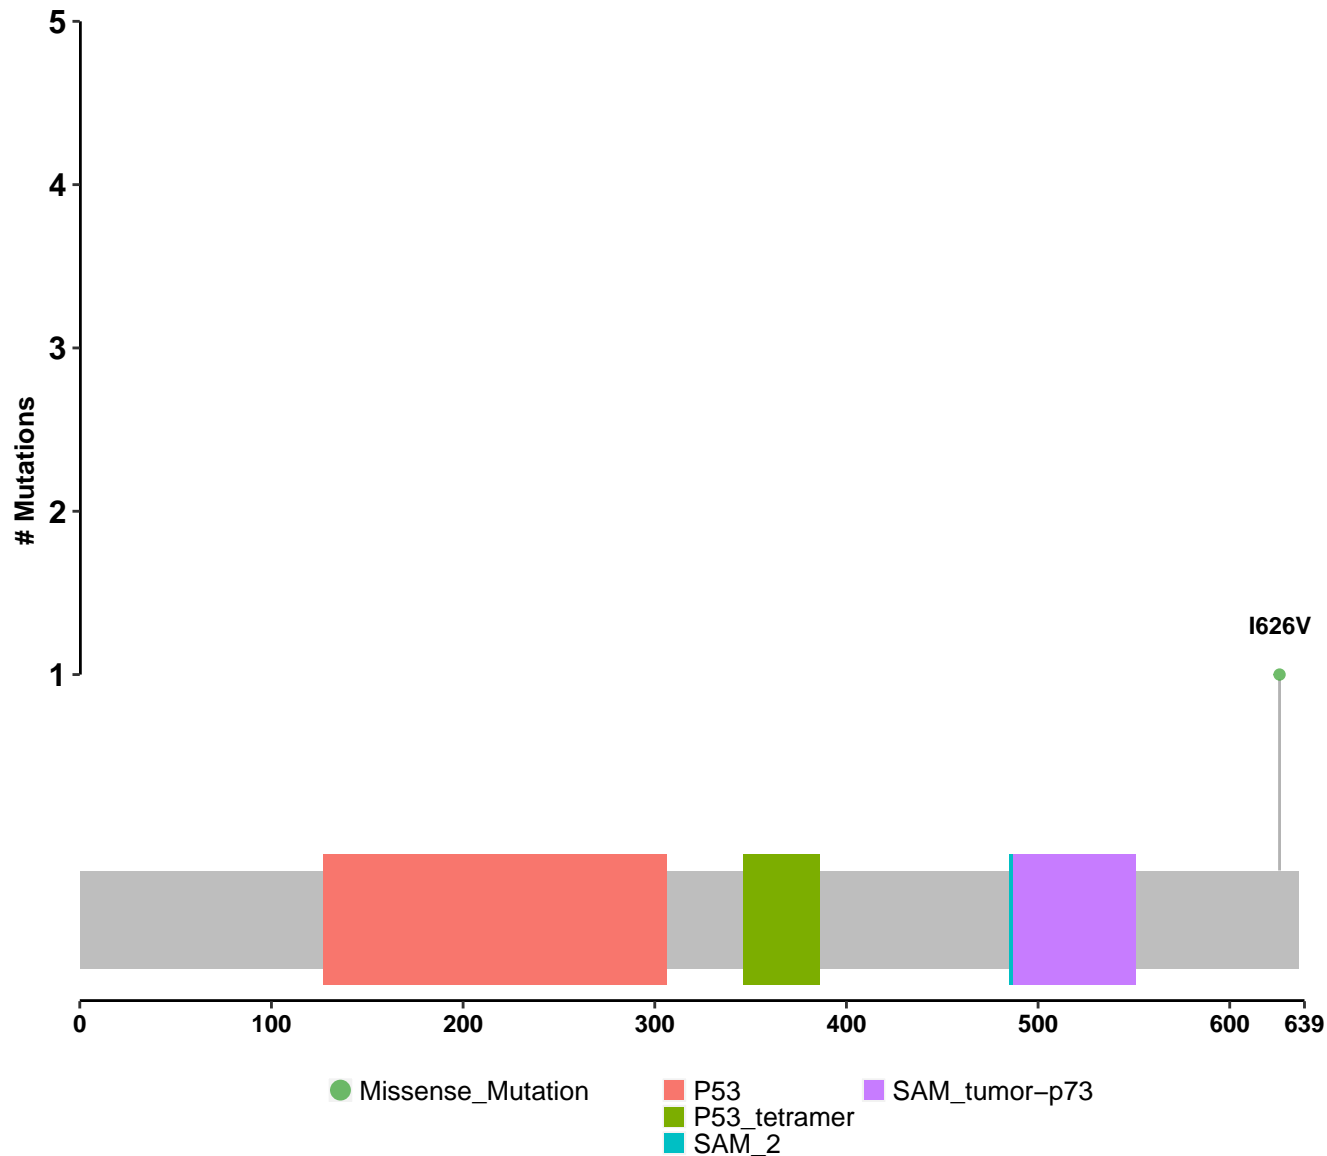

# RECQL4: [Somatic Mutation Rate: 15.15%]

NM\_004260

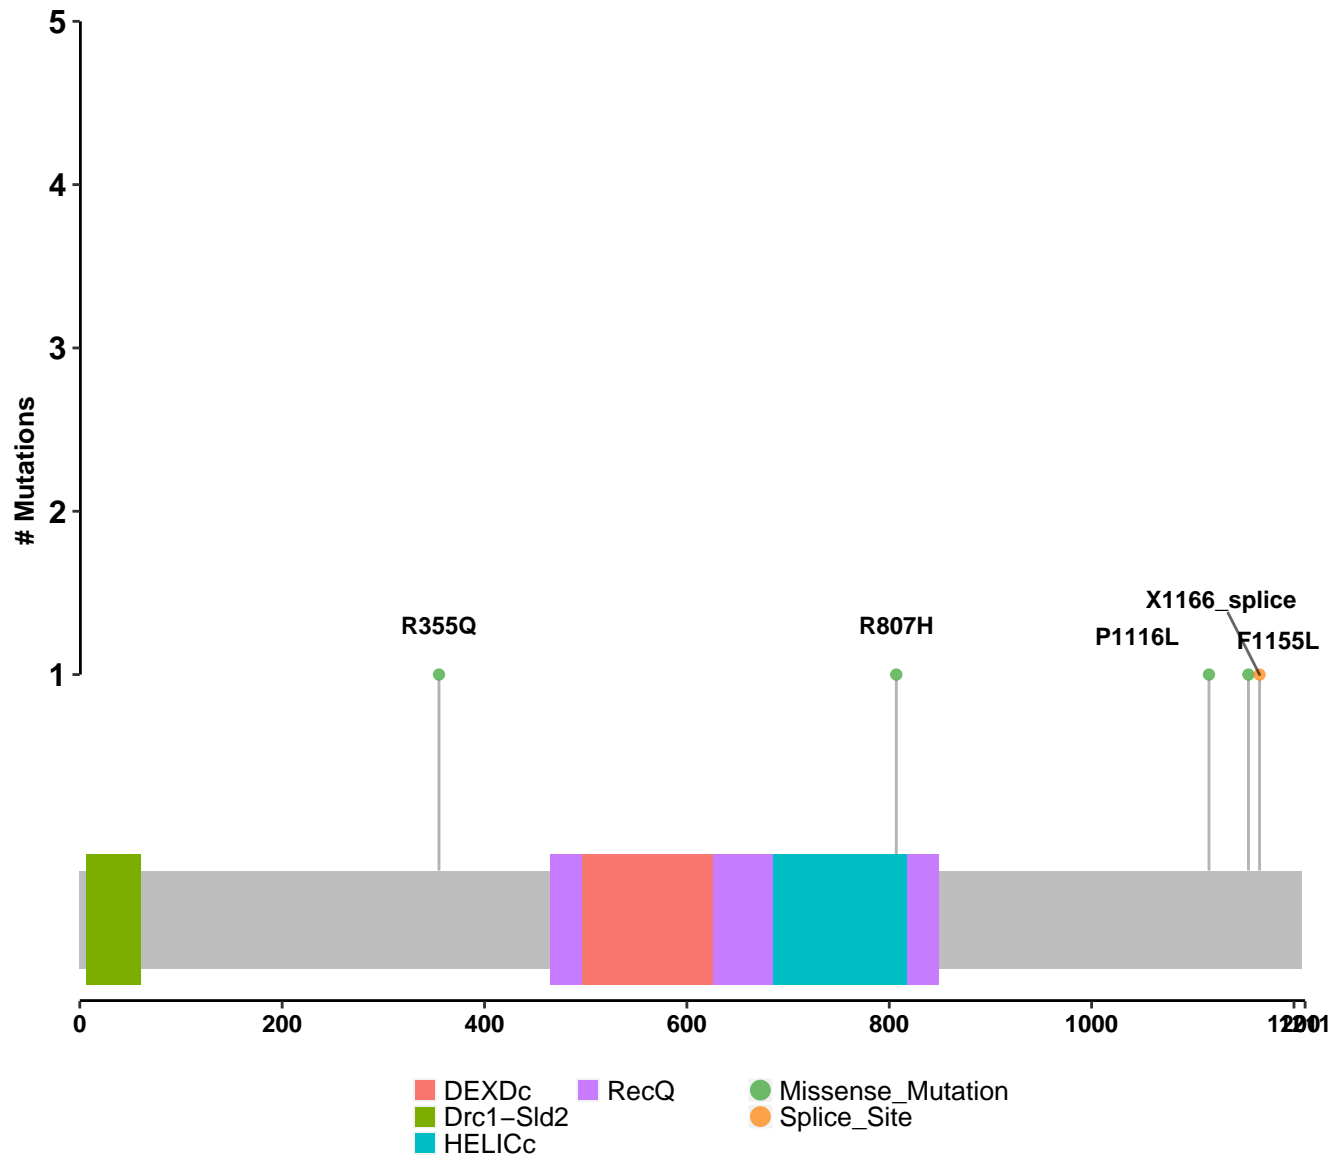

# RECQL5: [Somatic Mutation Rate: 12.12%]

NM\_004259

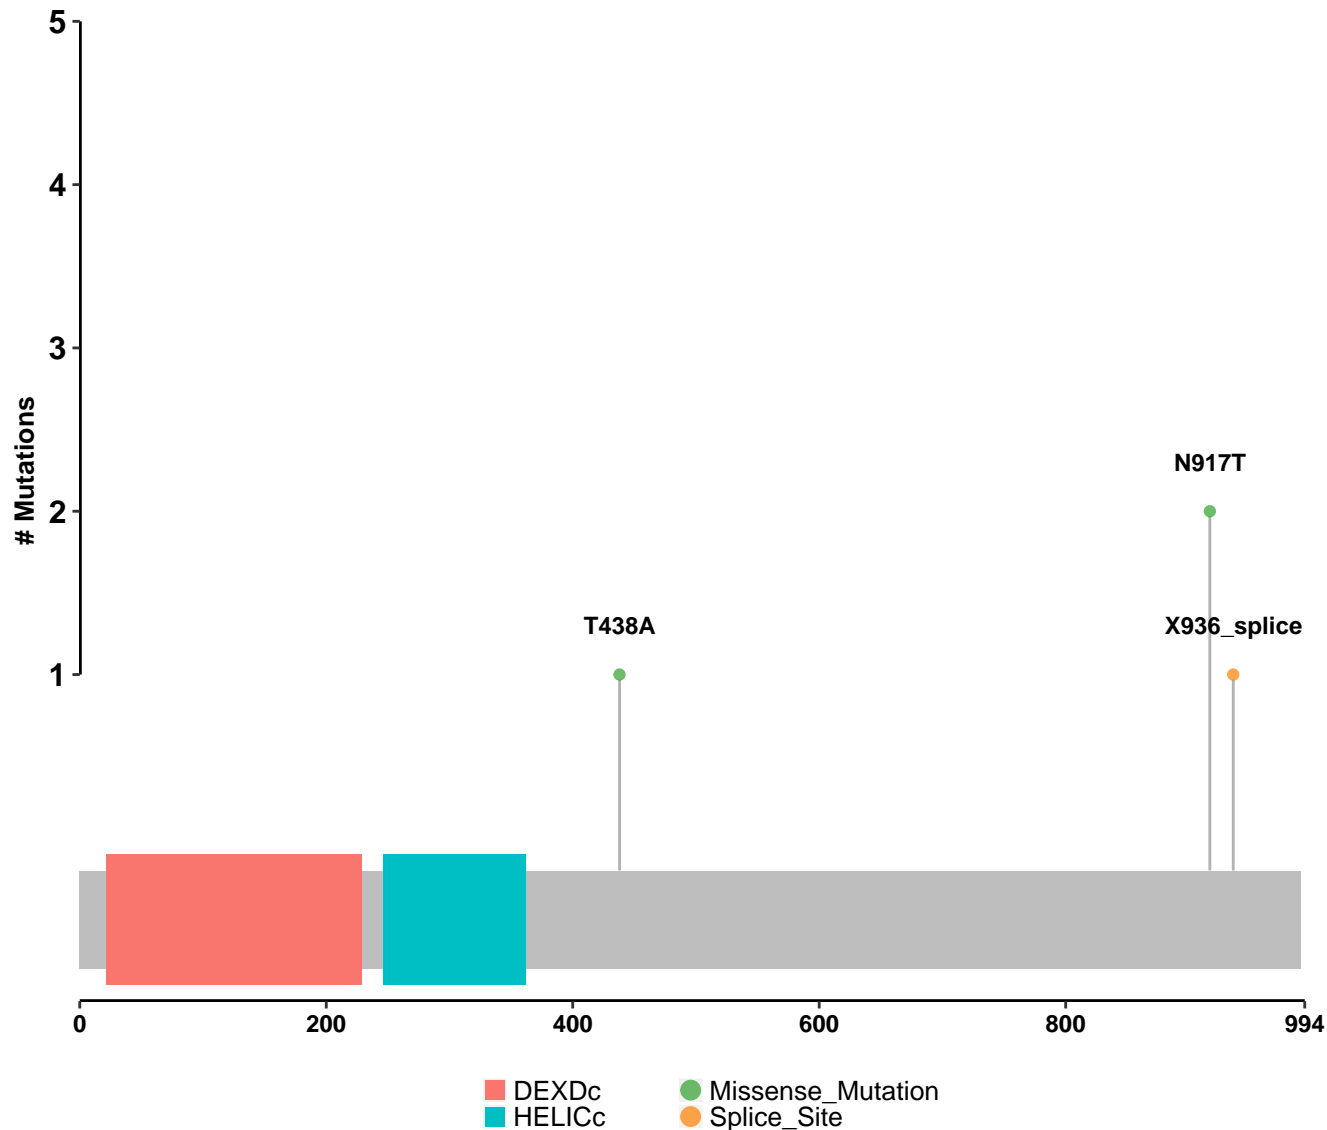

RECQL: [Somatic Mutation Rate: 3.03%]

NM\_002907

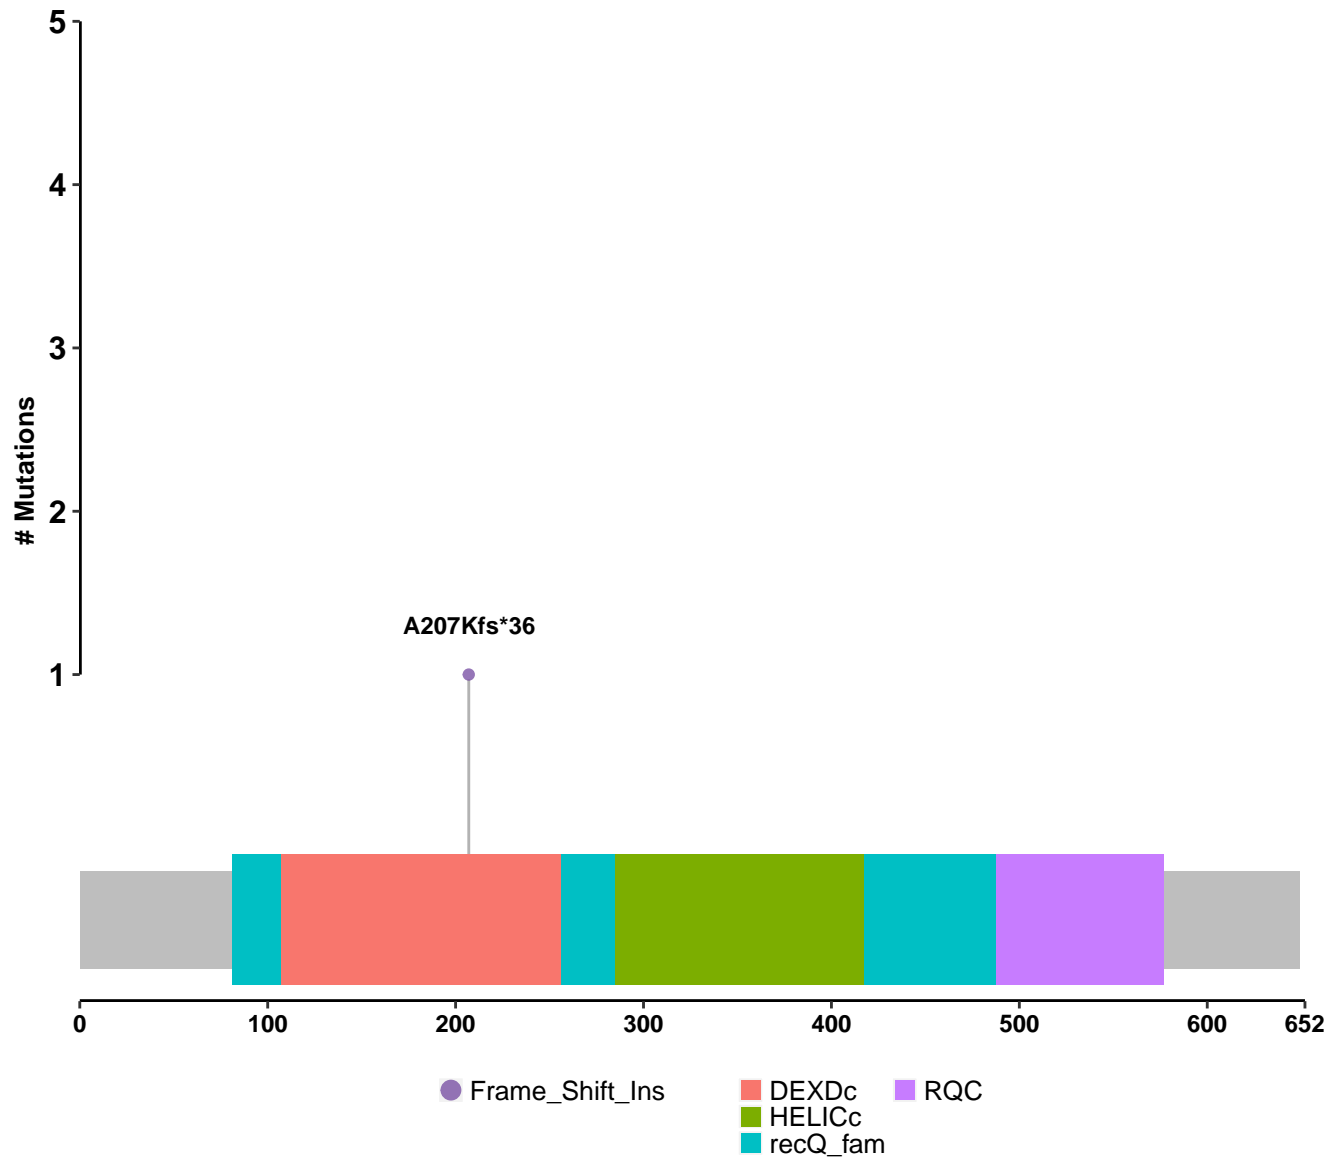

BLM: [Somatic Mutation Rate: 15.15%]

NM\_000057

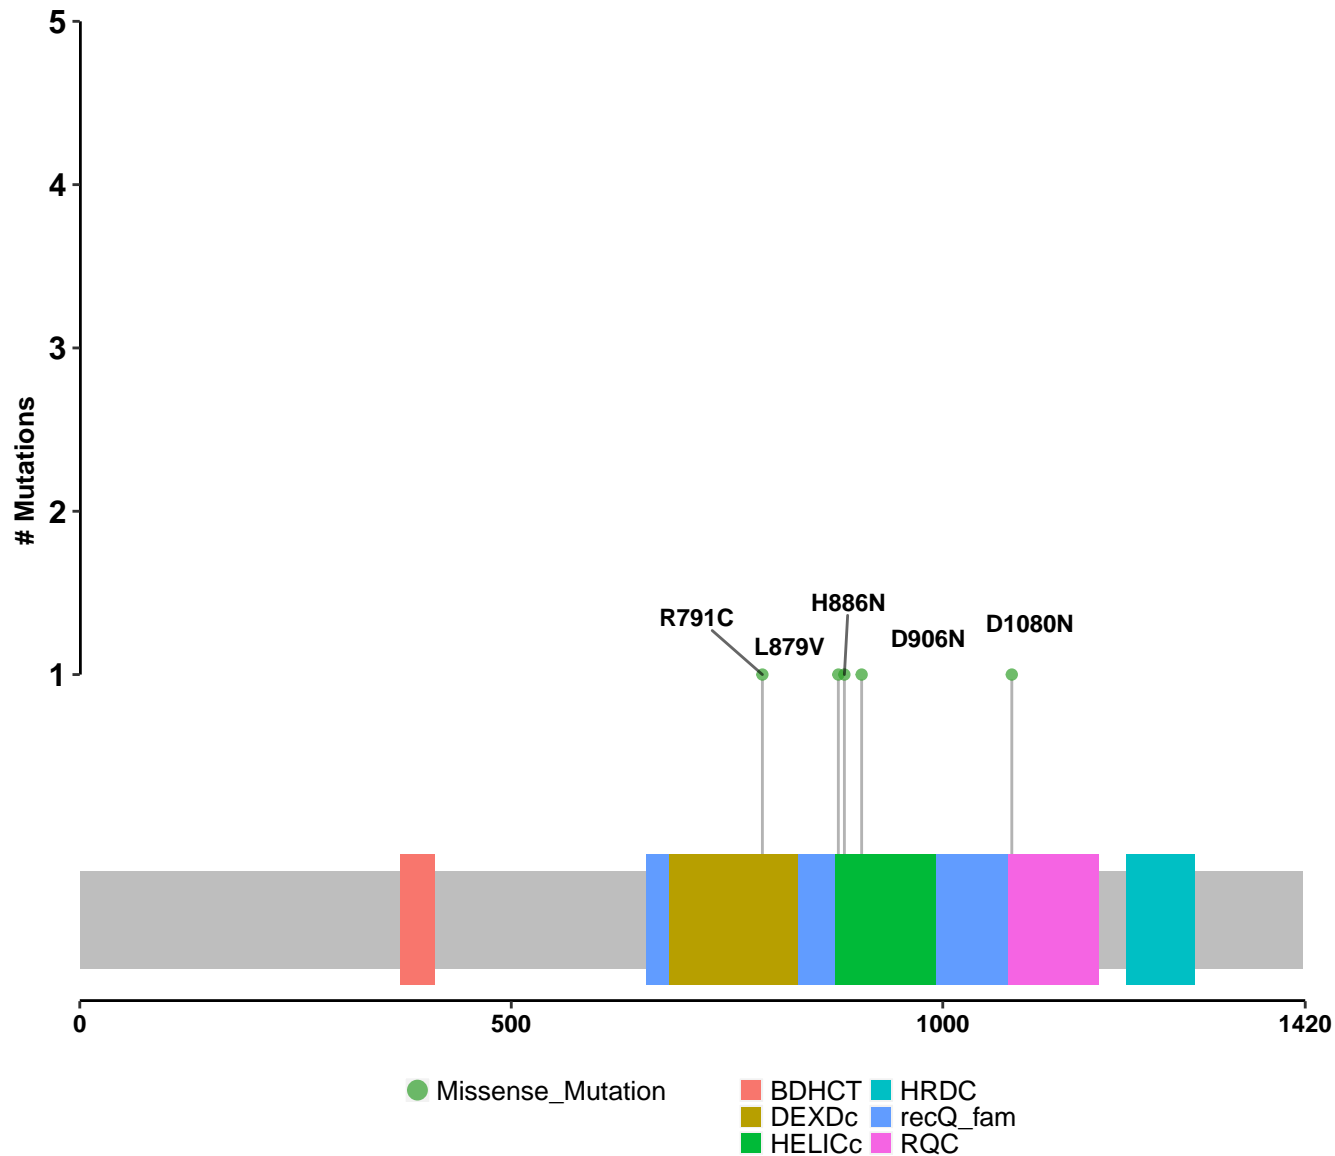



# PMS1: [Somatic Mutation Rate: 3.03%]

NM\_000534

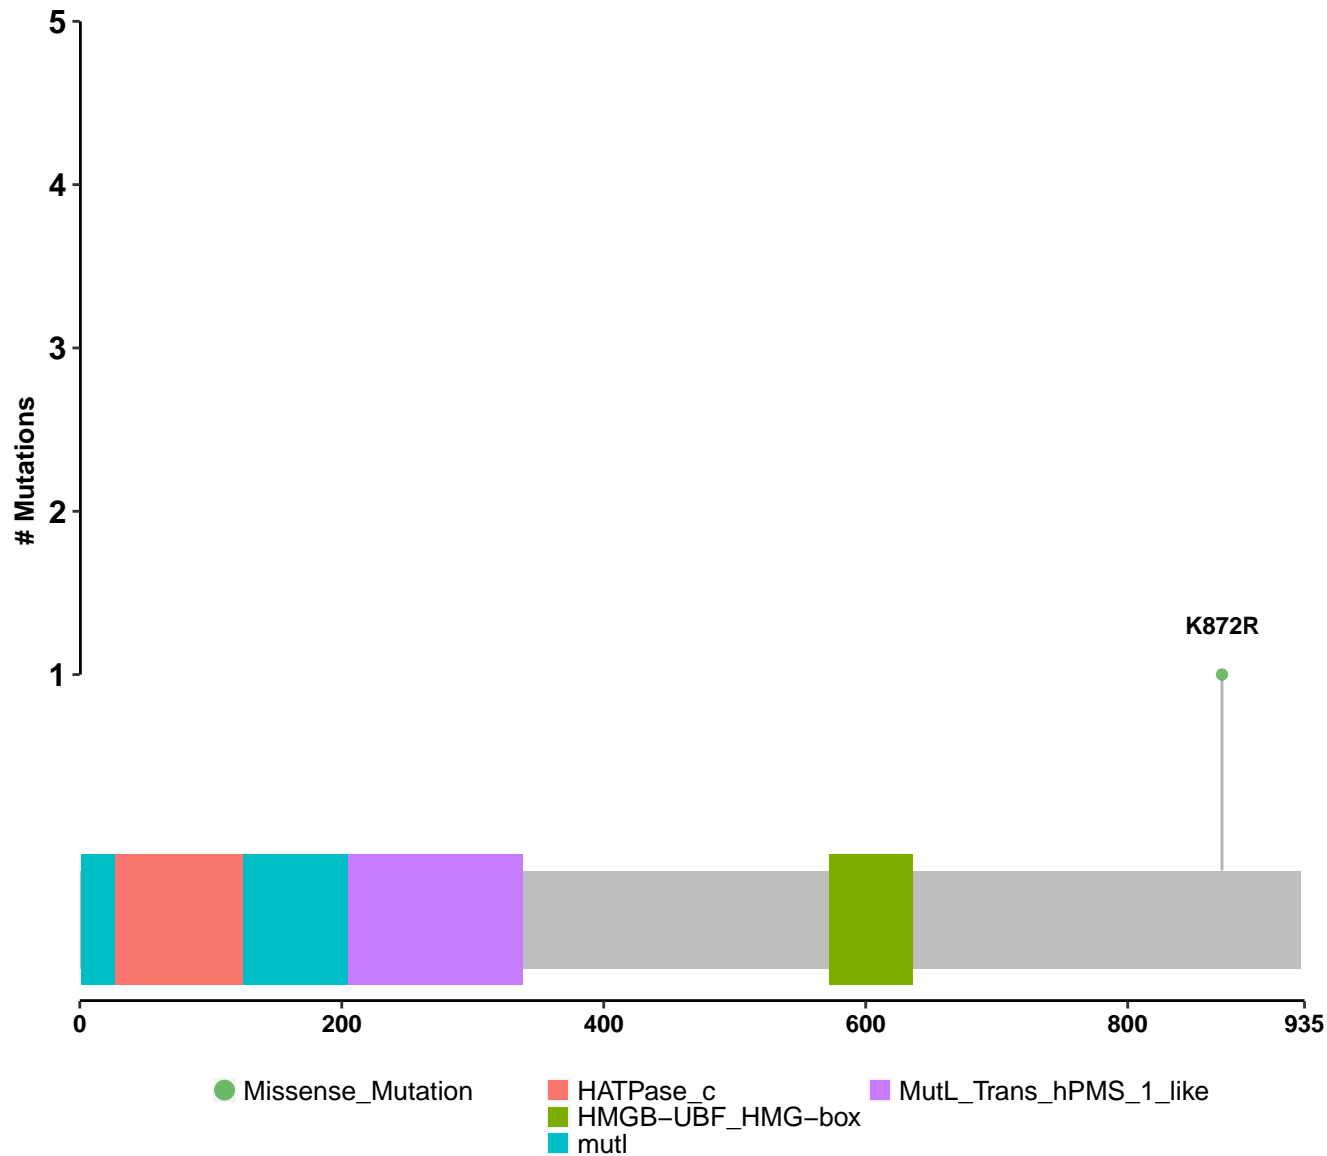

# MSH3: [Somatic Mutation Rate: 12.12%]

NM\_002439

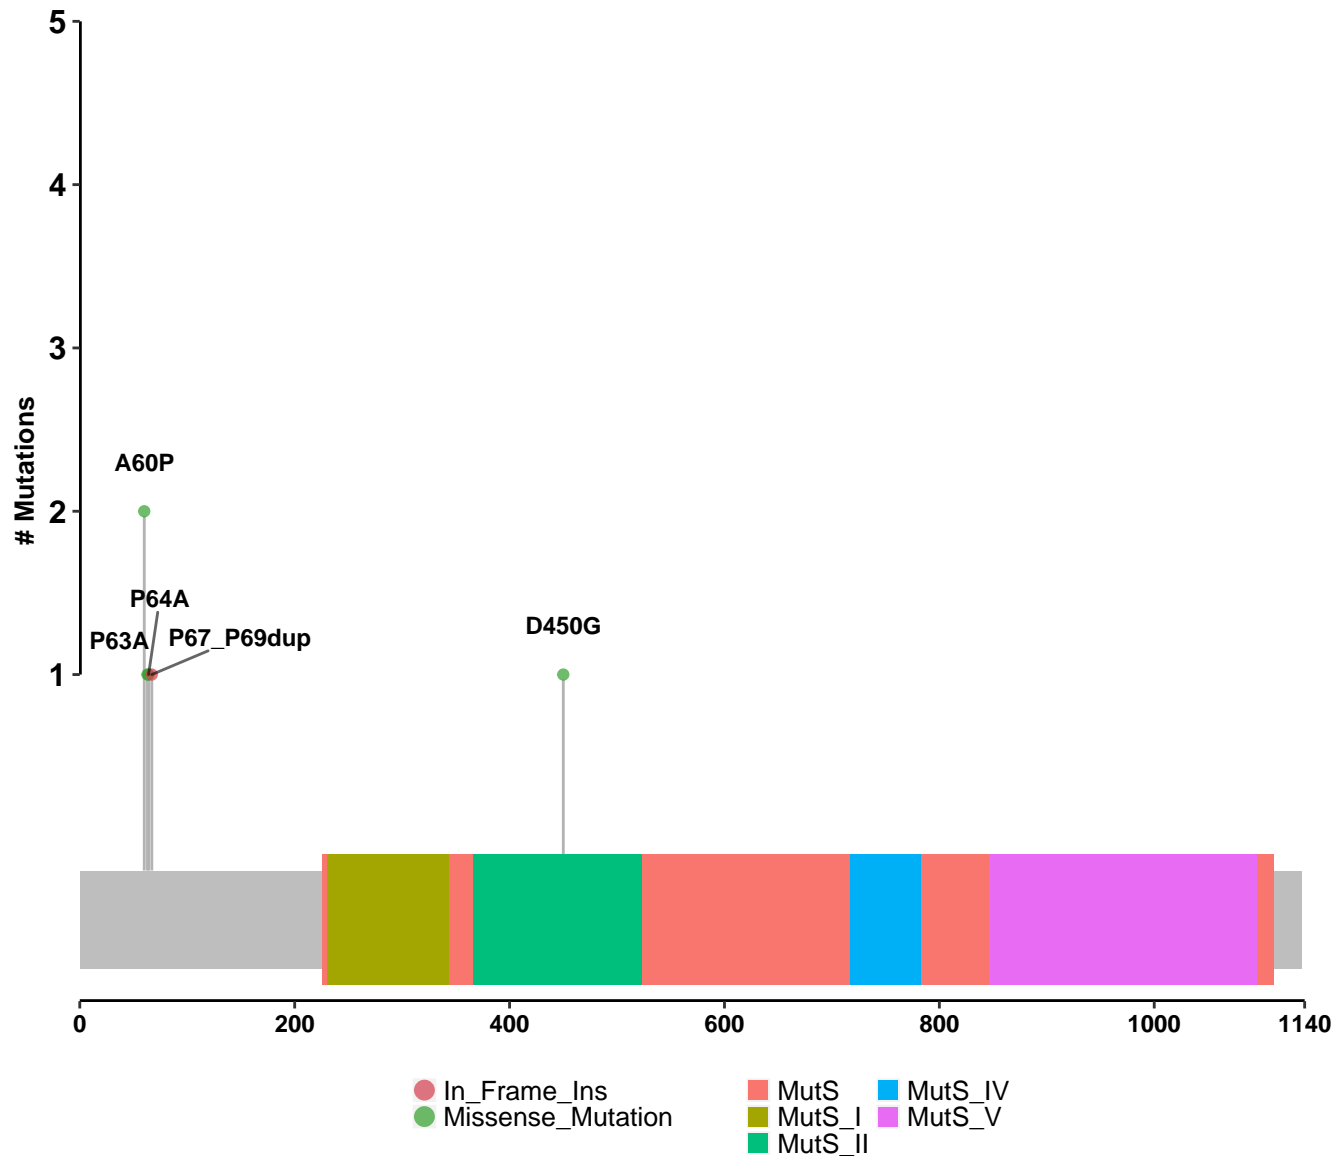

# MSH2: [Somatic Mutation Rate: 3.03%]

NM\_000251

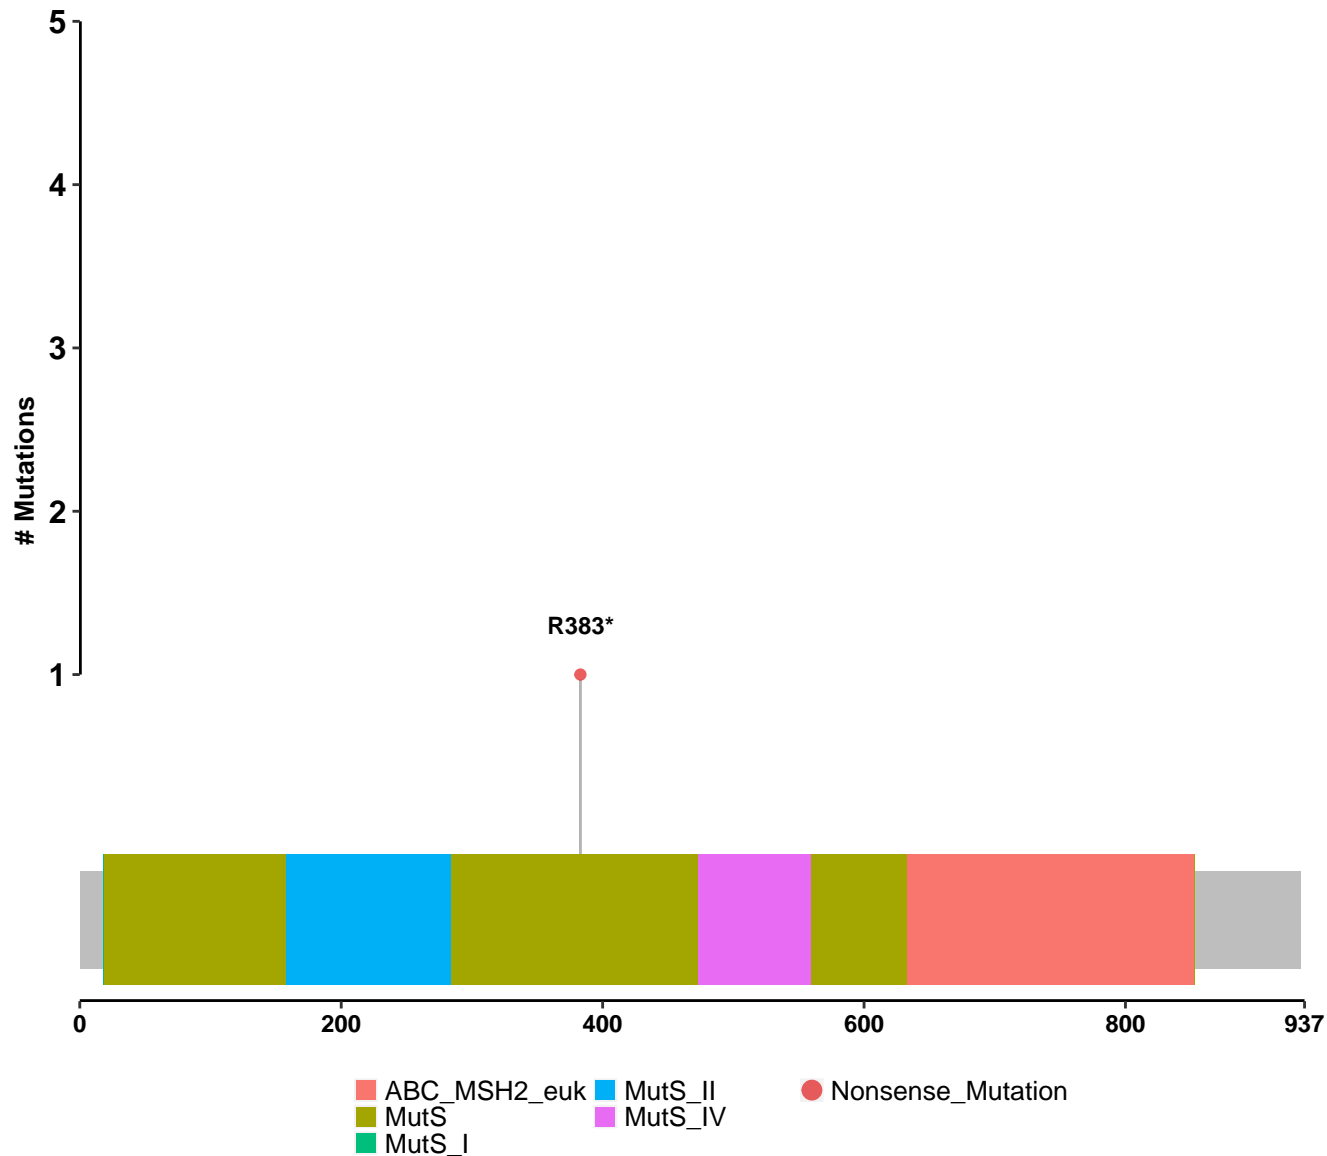

# MLH1: [Somatic Mutation Rate: 6.06%]

NM\_000249

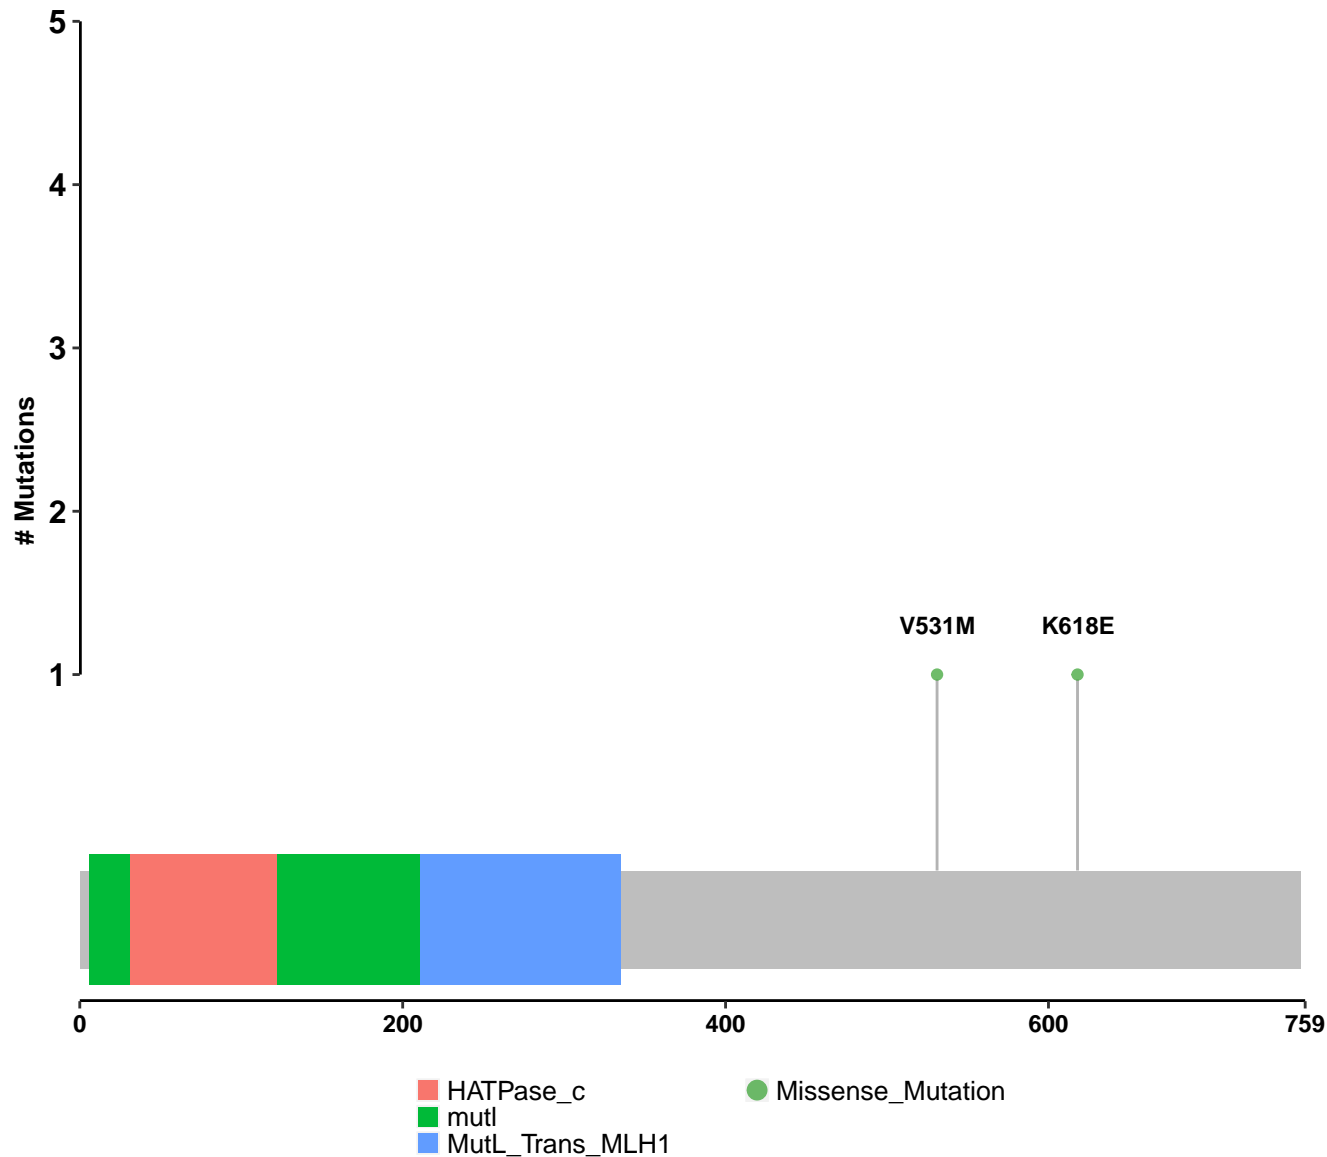

WRN: [Somatic Mutation Rate: 3.03%]

NM\_000553

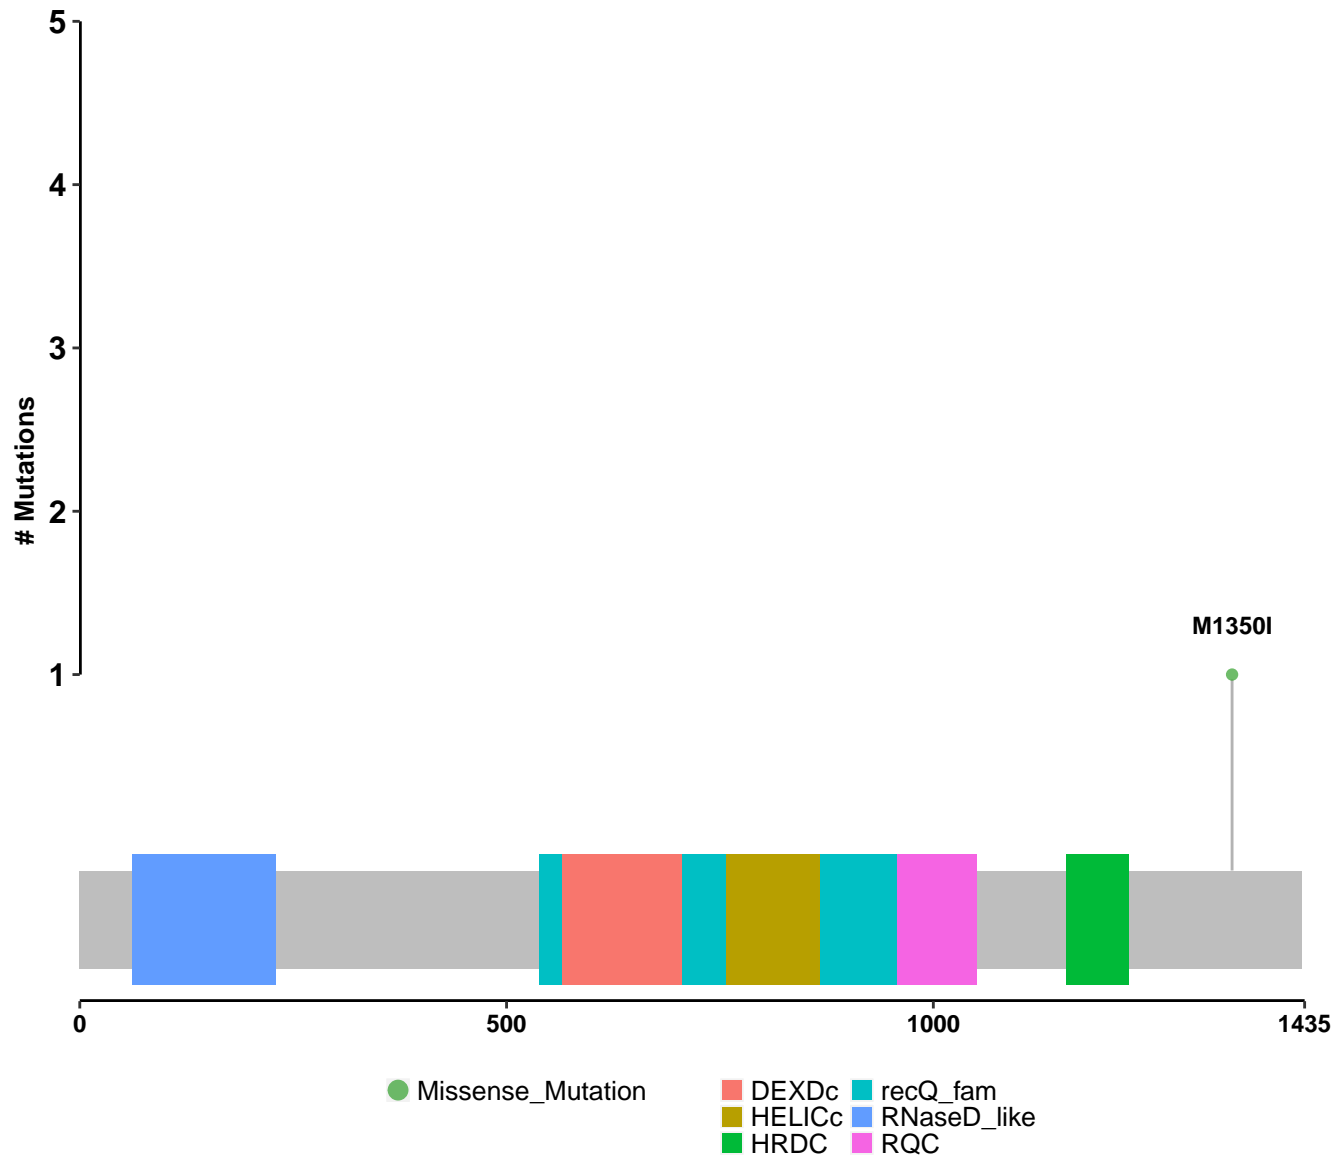

**ATRX: [Somatic Mutation Rate: 12.12%]**

NM\_000489

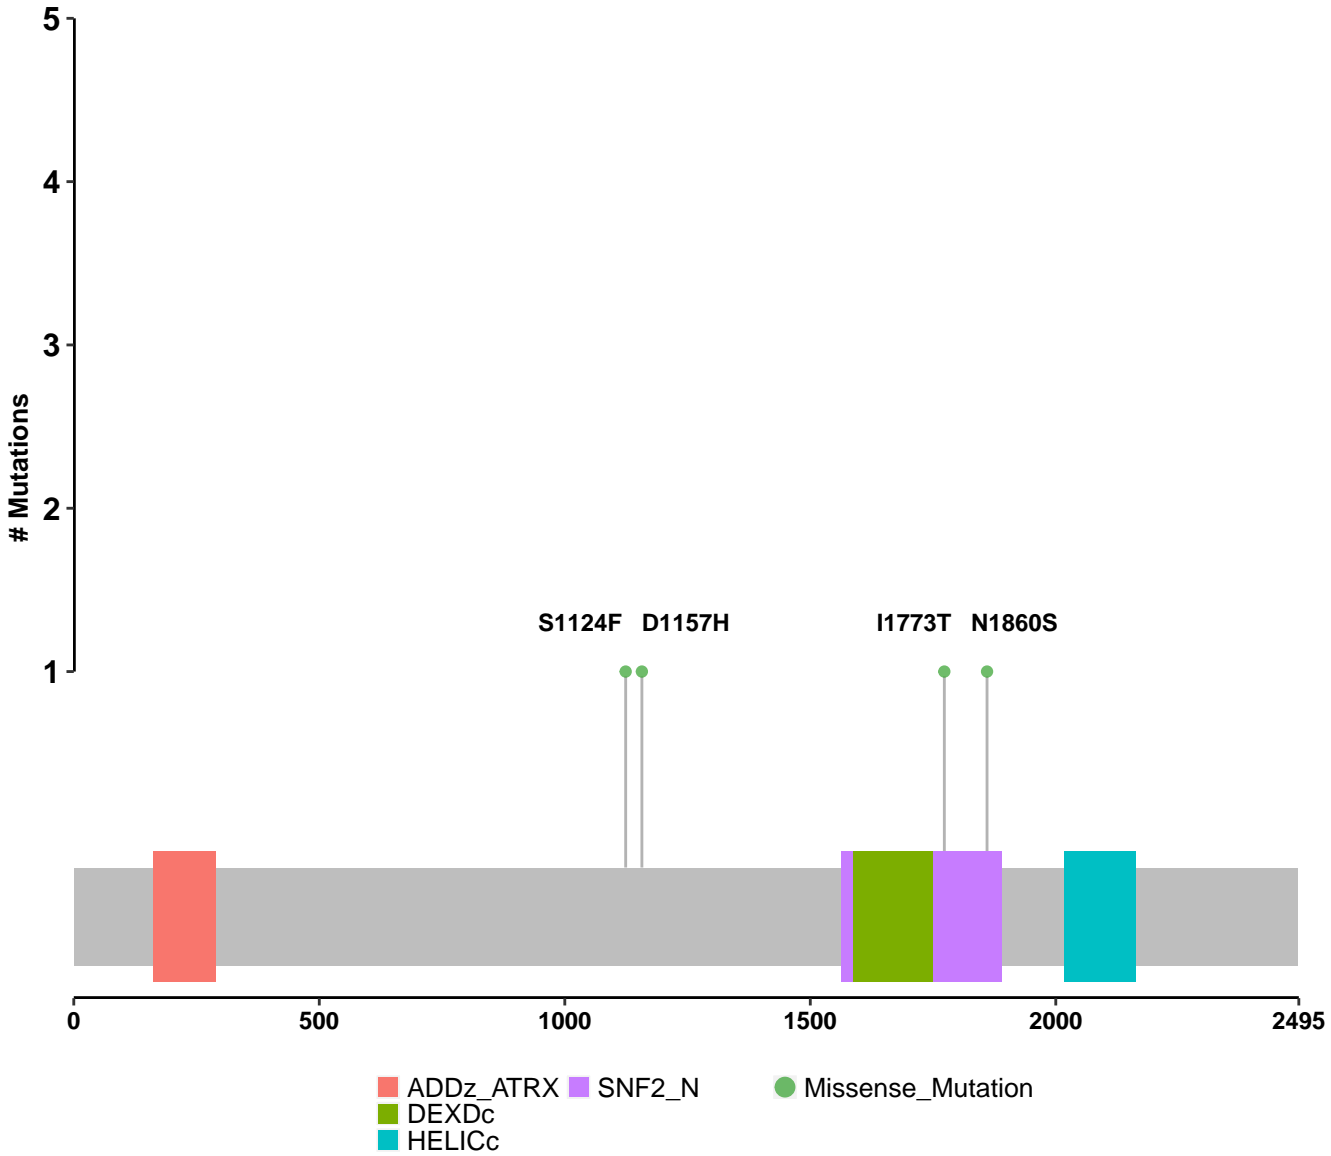

# ERCC2: [Somatic Mutation Rate: 3.03%]

NM\_000400

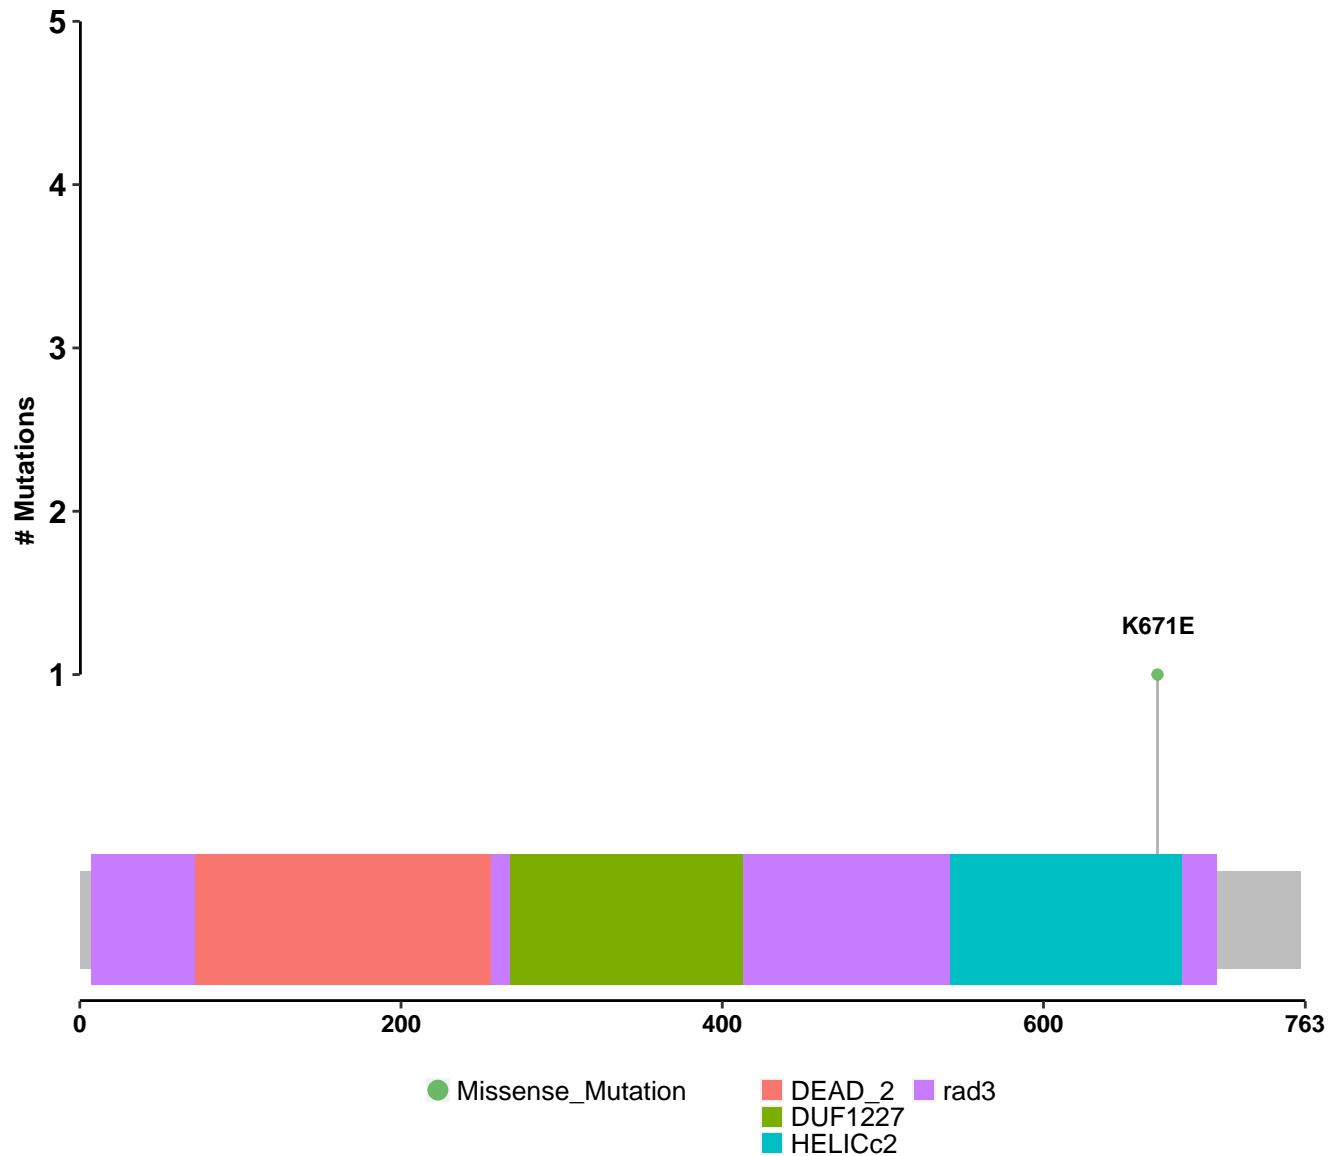

# CASP7: [Somatic Mutation Rate: 3.03%]

NM\_001267057

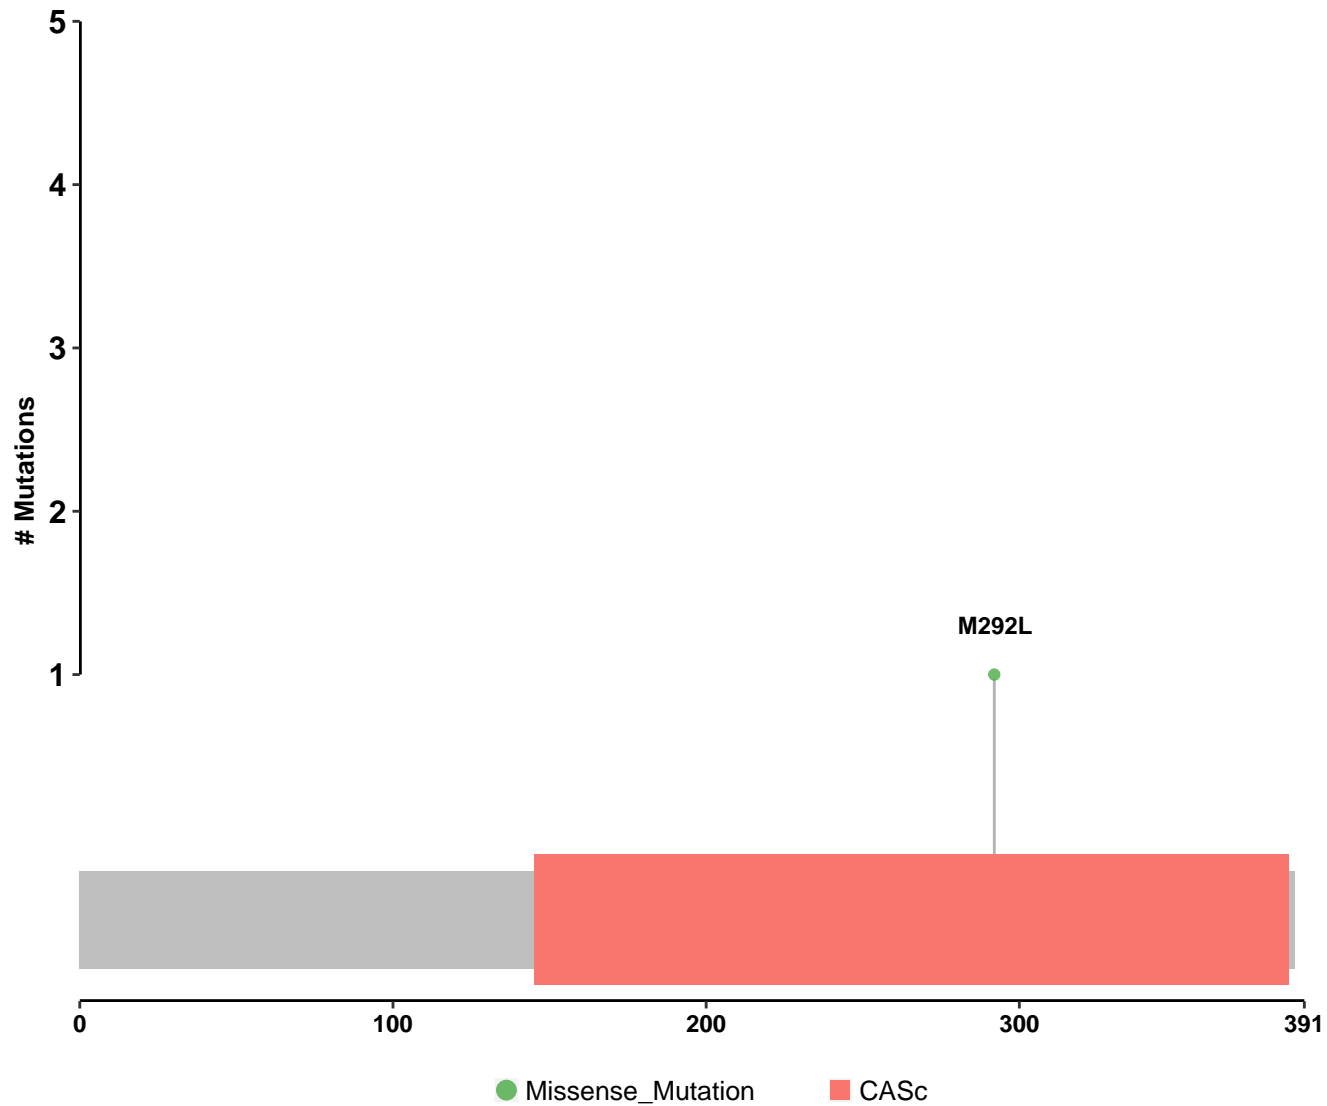



# CHD2: [Somatic Mutation Rate: 9.09%]

NM\_001271

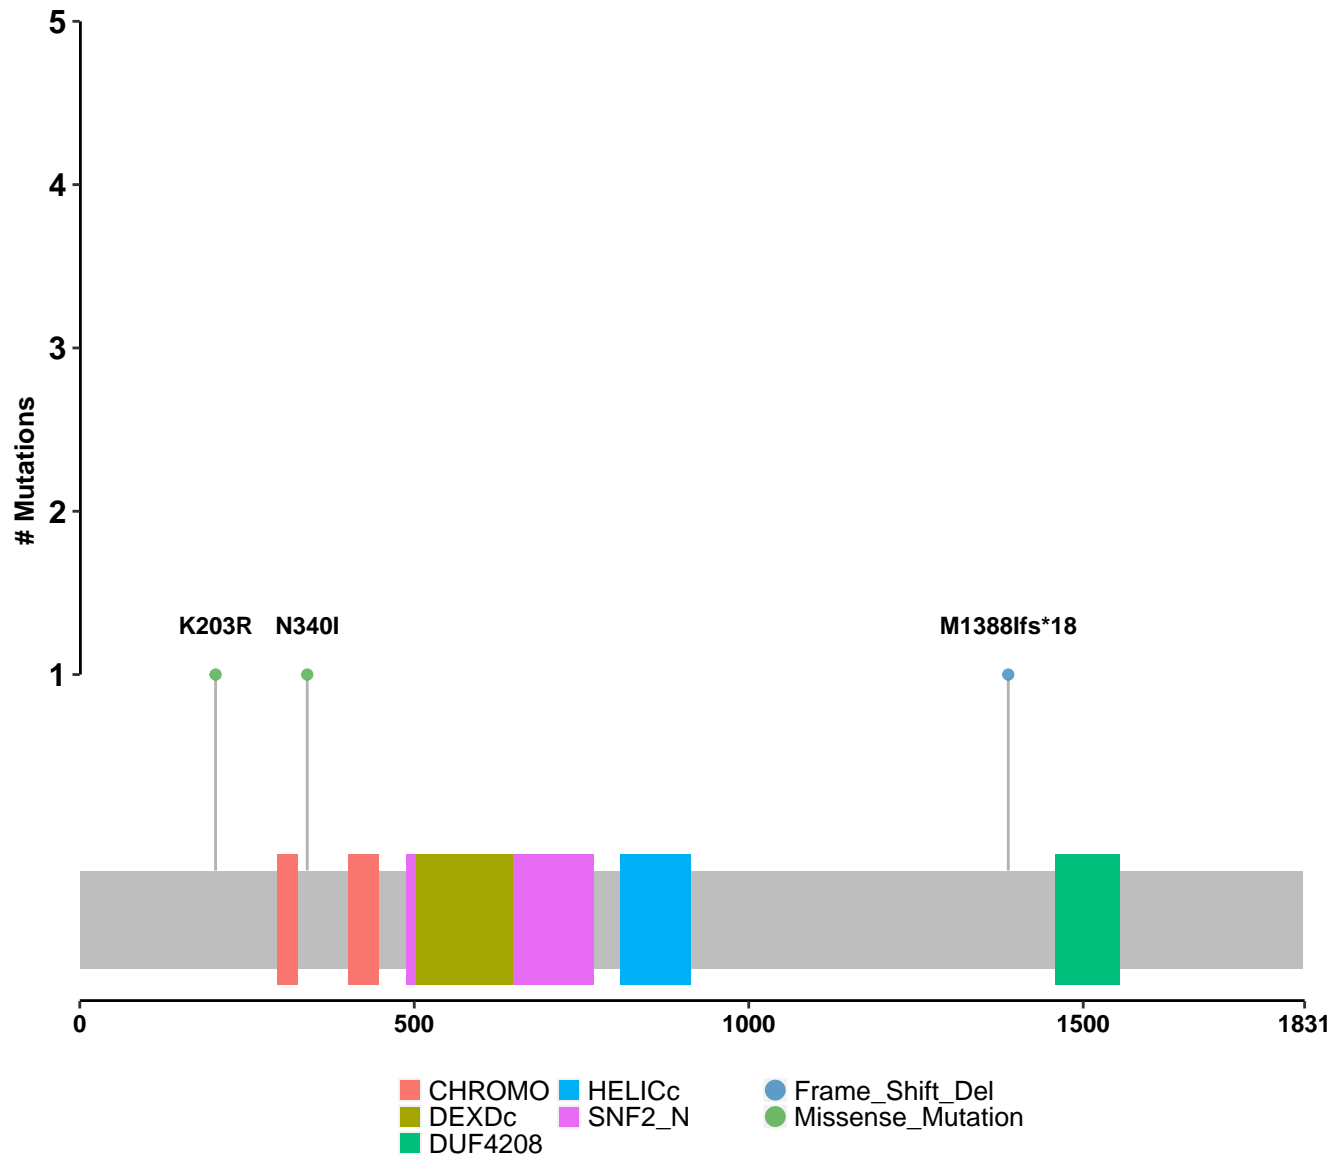

# TET2: [Somatic Mutation Rate: 12.12%]

NM\_001127208

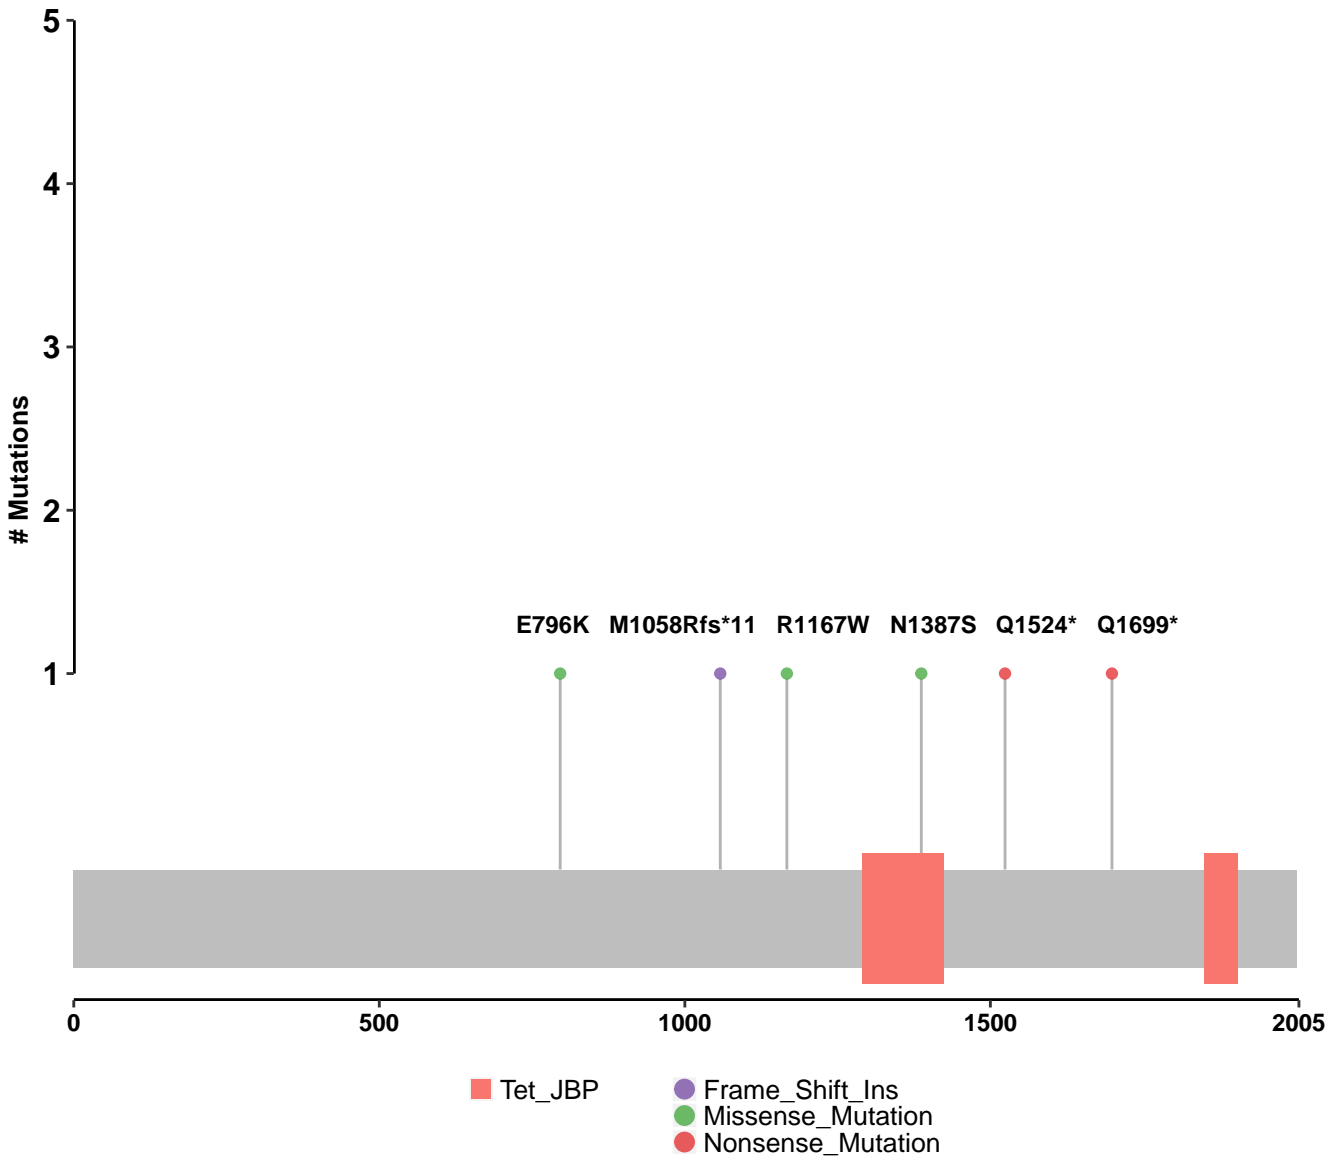

# DOT1L: [Somatic Mutation Rate: 12.12%]

NM\_032482

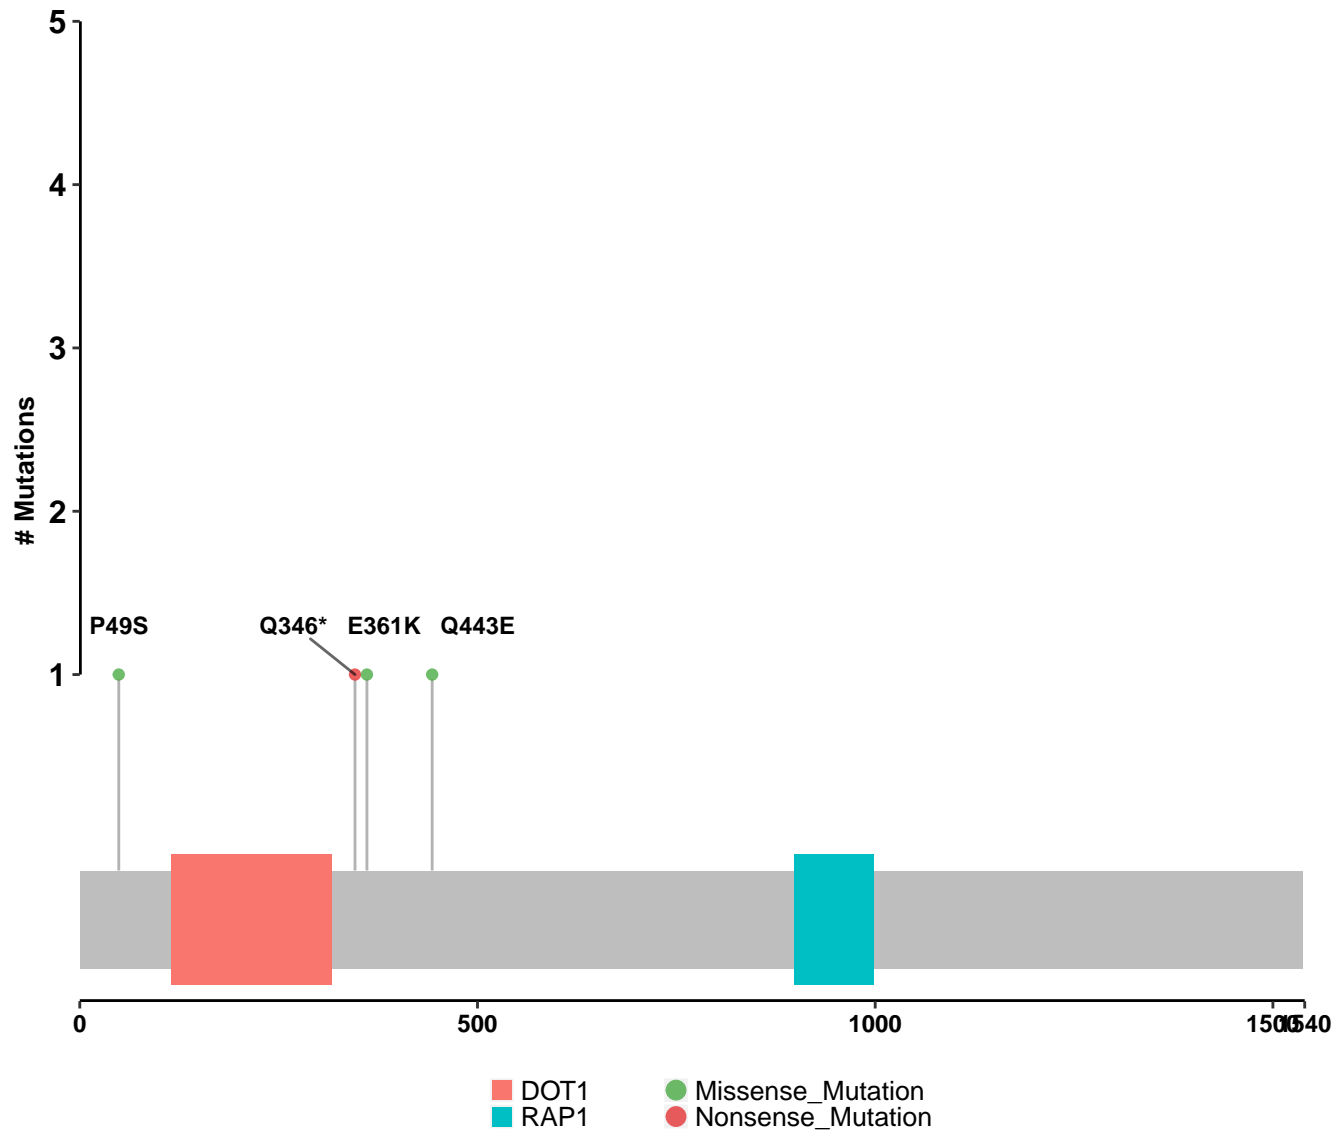

# ARID1A: [Somatic Mutation Rate: 9.09%]

NM\_006015

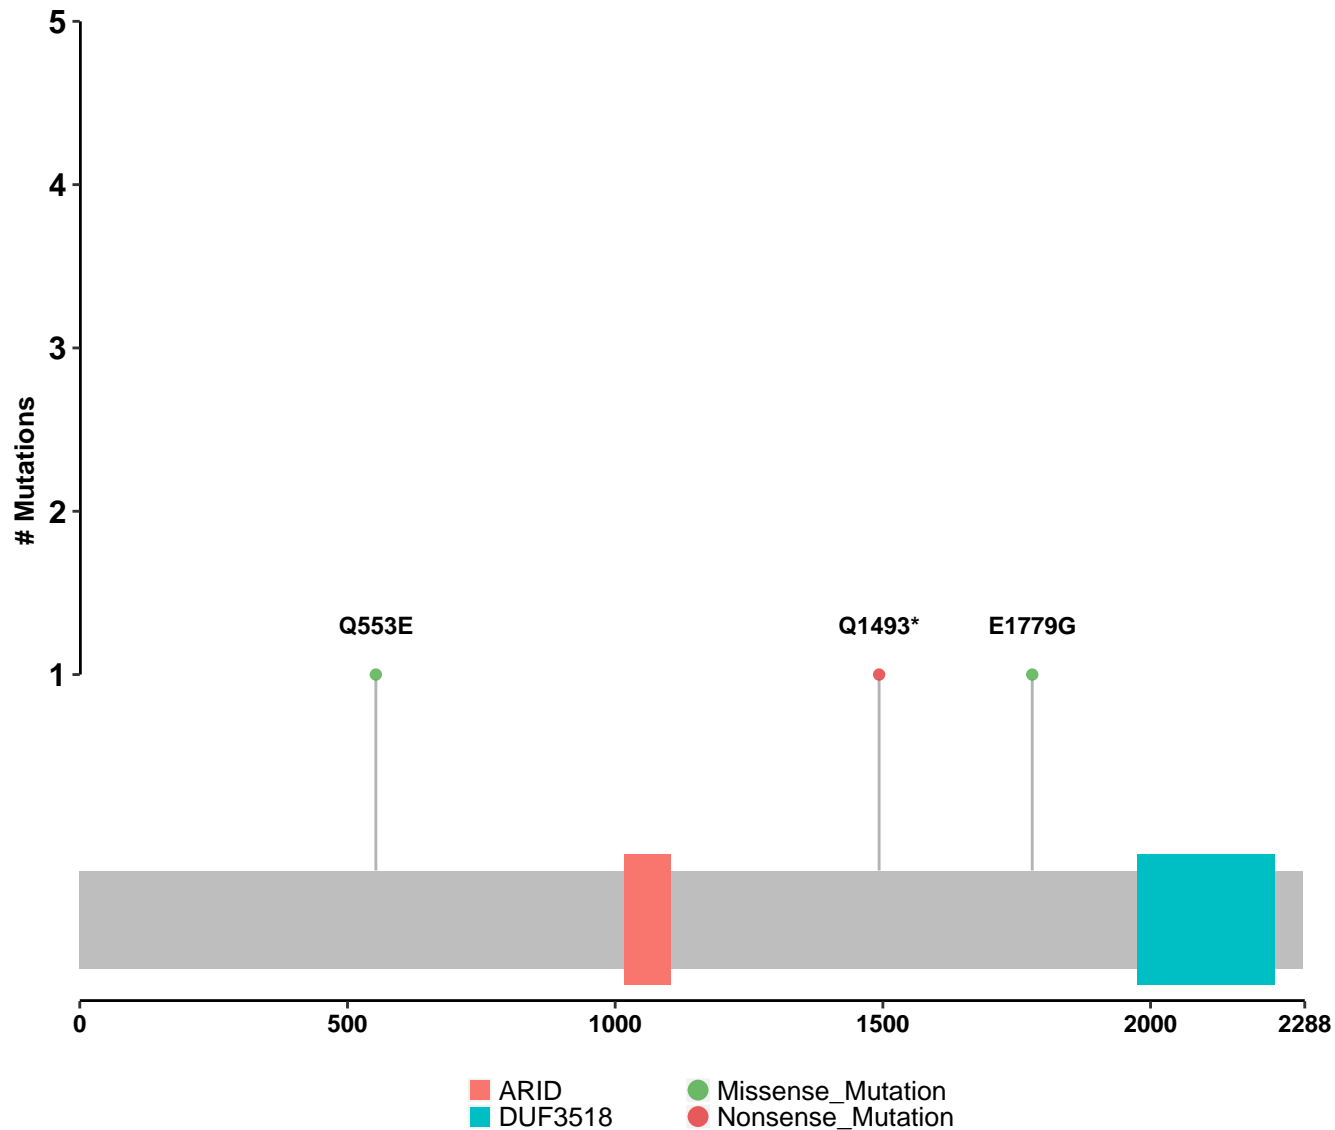

# DDX58: [Somatic Mutation Rate: 9.09%]

NM\_014314

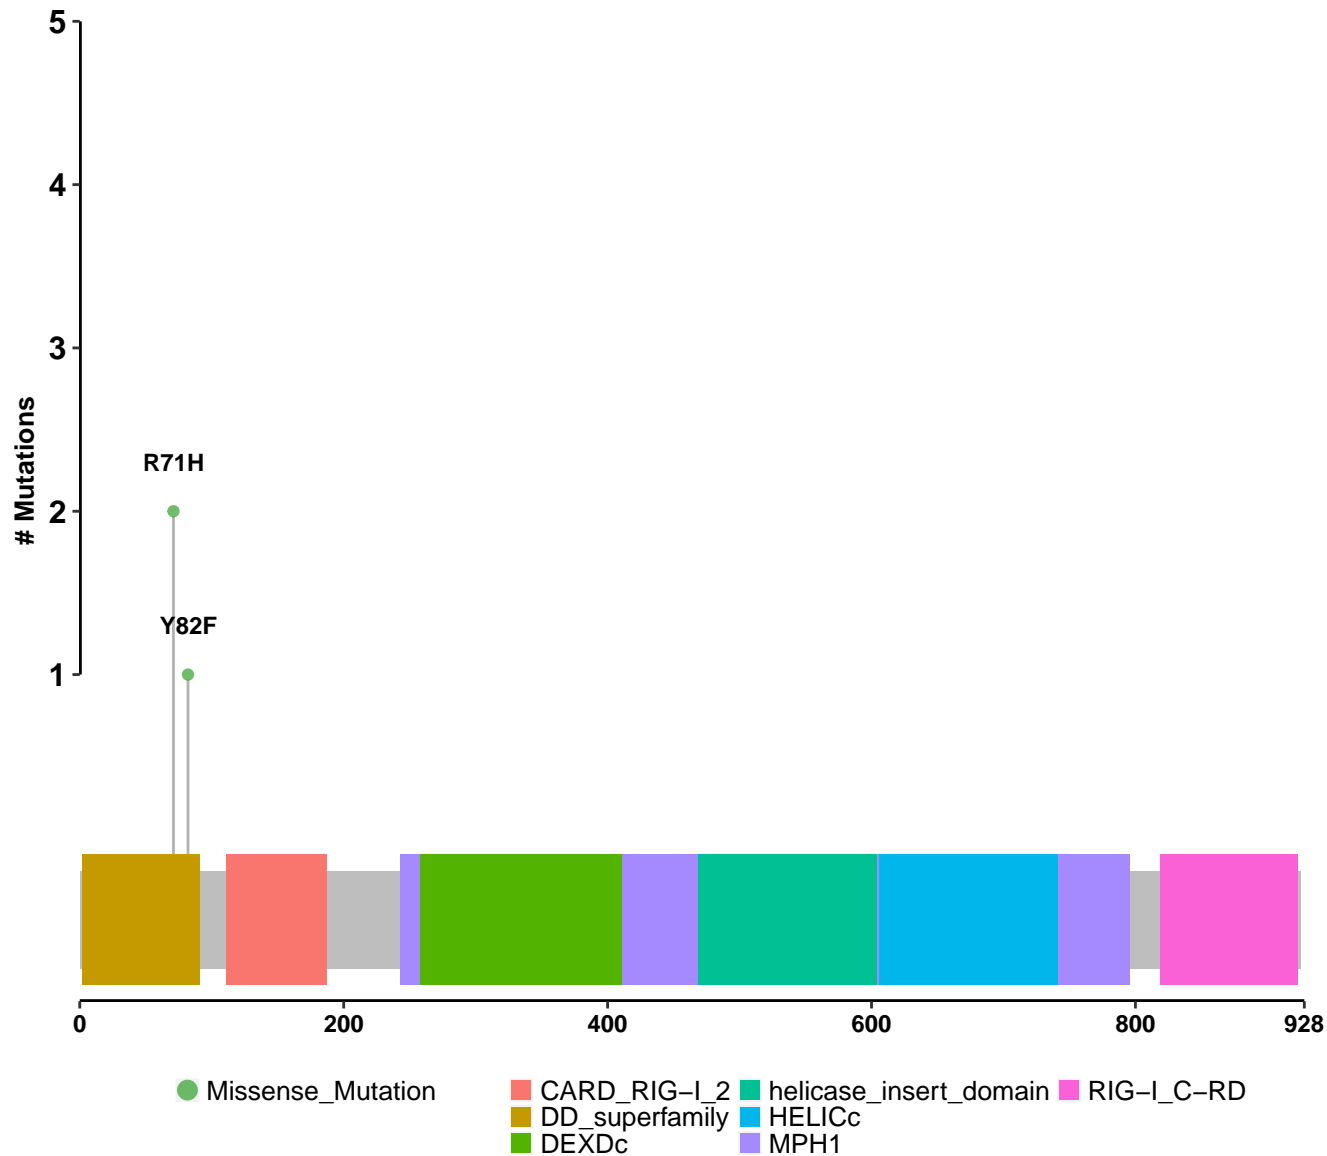

# DNMT3A: [Somatic Mutation Rate: 9.09%]

NM\_175629

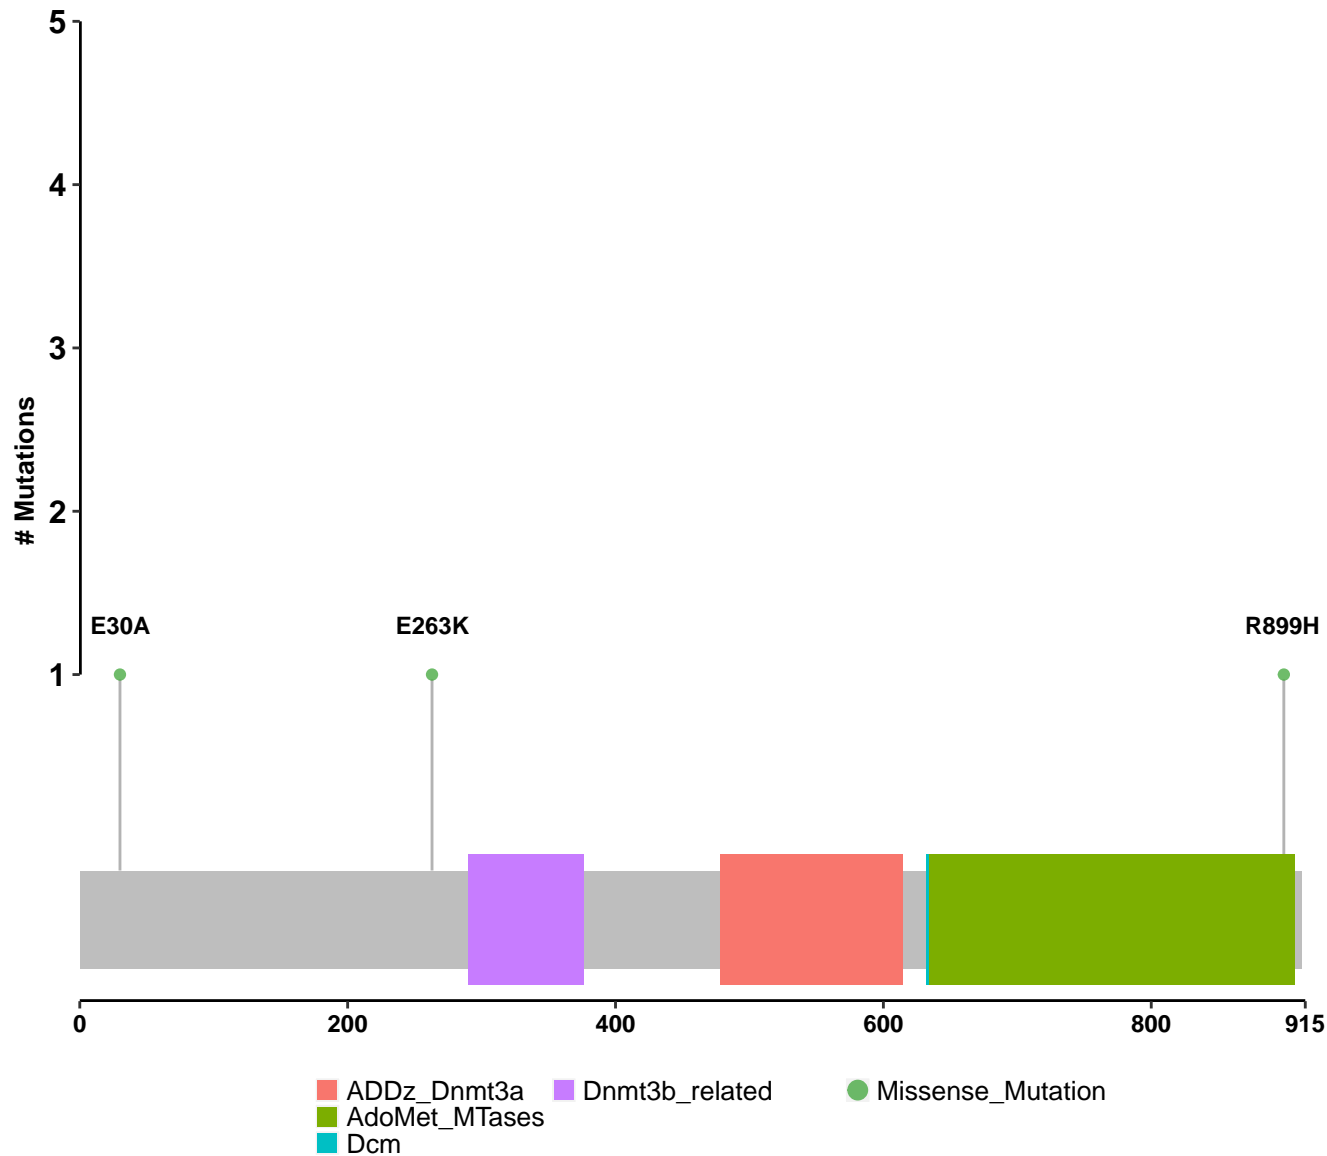

# EP300: [Somatic Mutation Rate: 6.06%]

NM\_001429

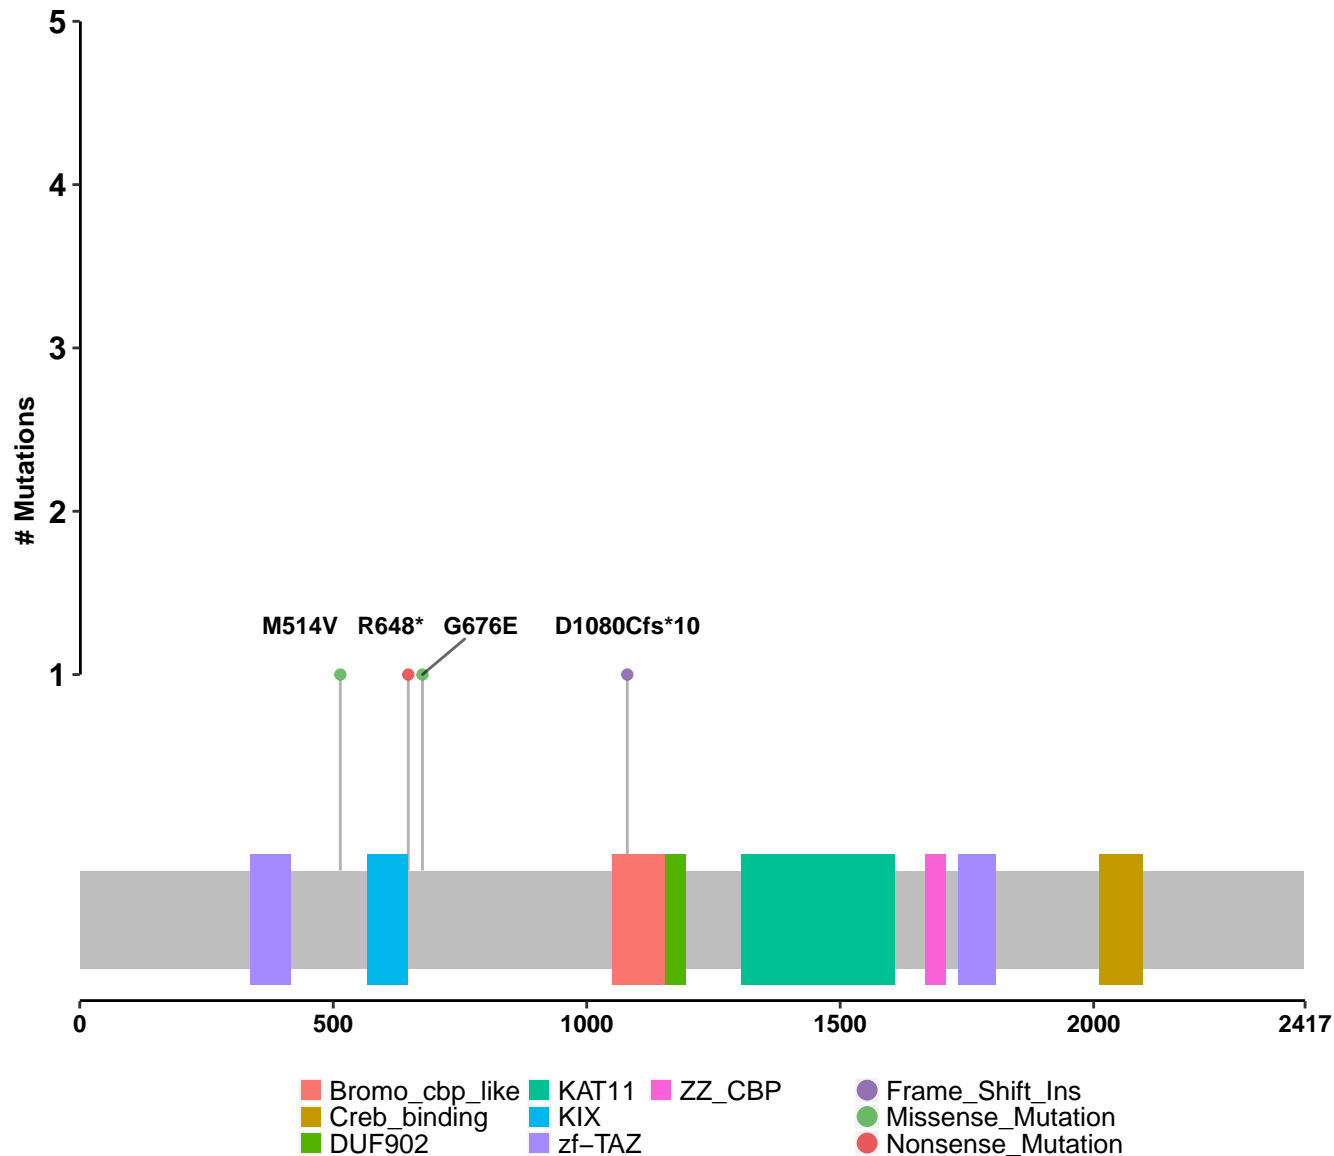

# HDAC4: [Somatic Mutation Rate: 9.09%]

NM\_006037

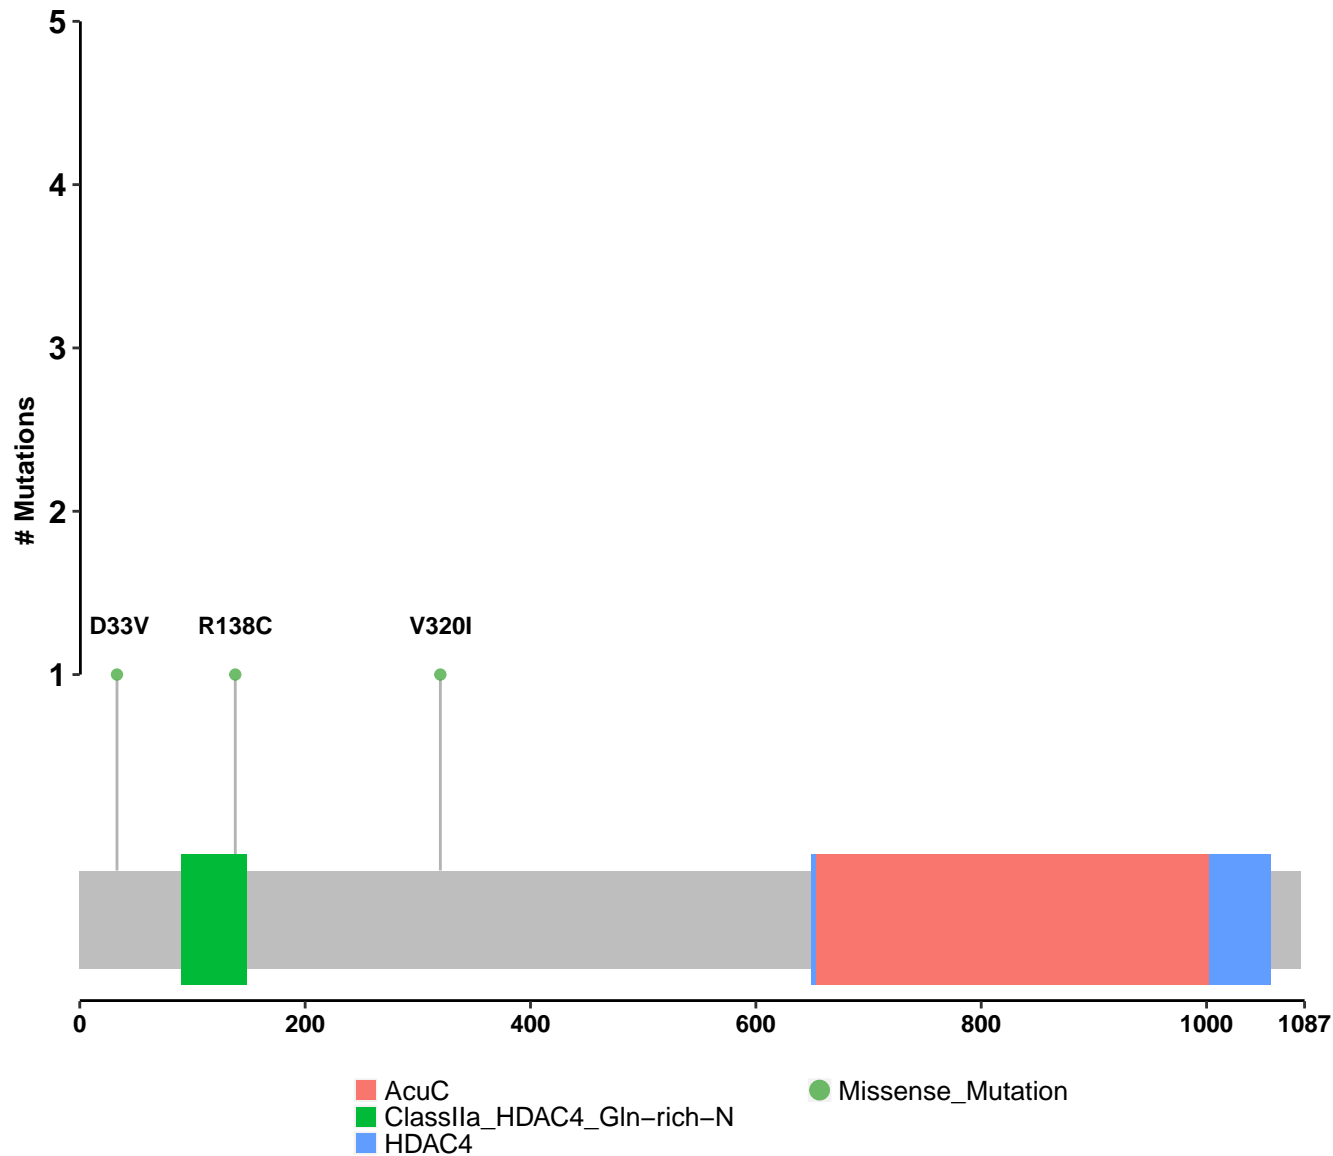



# HDAC7: [Somatic Mutation Rate: 9.09%]

NM\_015401

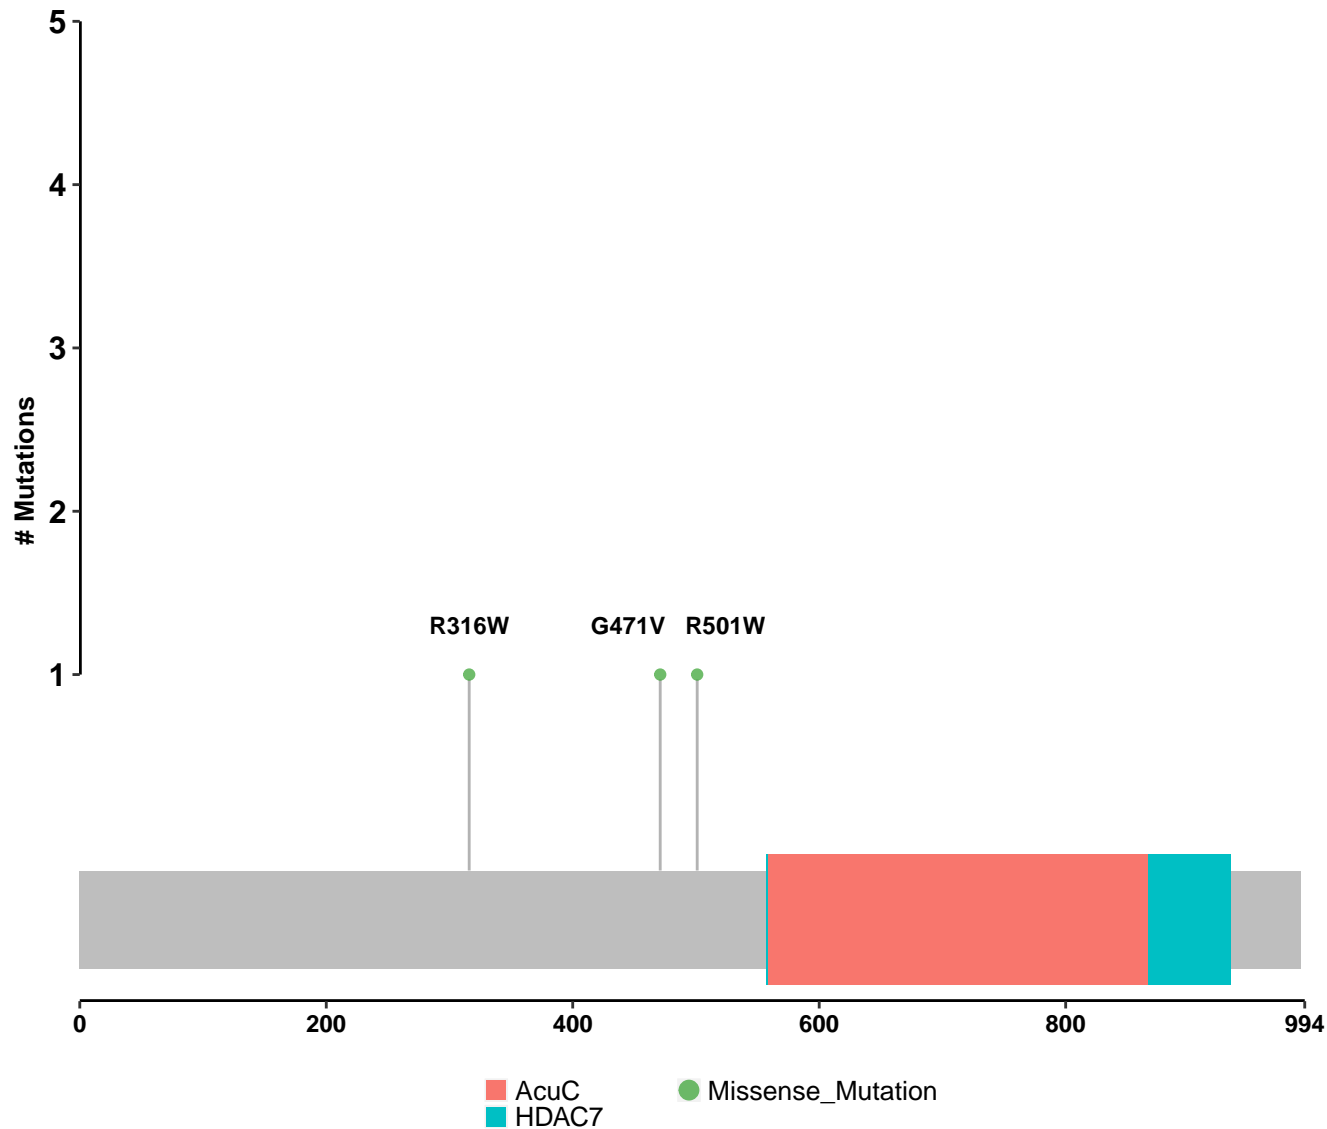

# HIST1H1C: [Somatic Mutation Rate: 9.09%]

NM\_005319

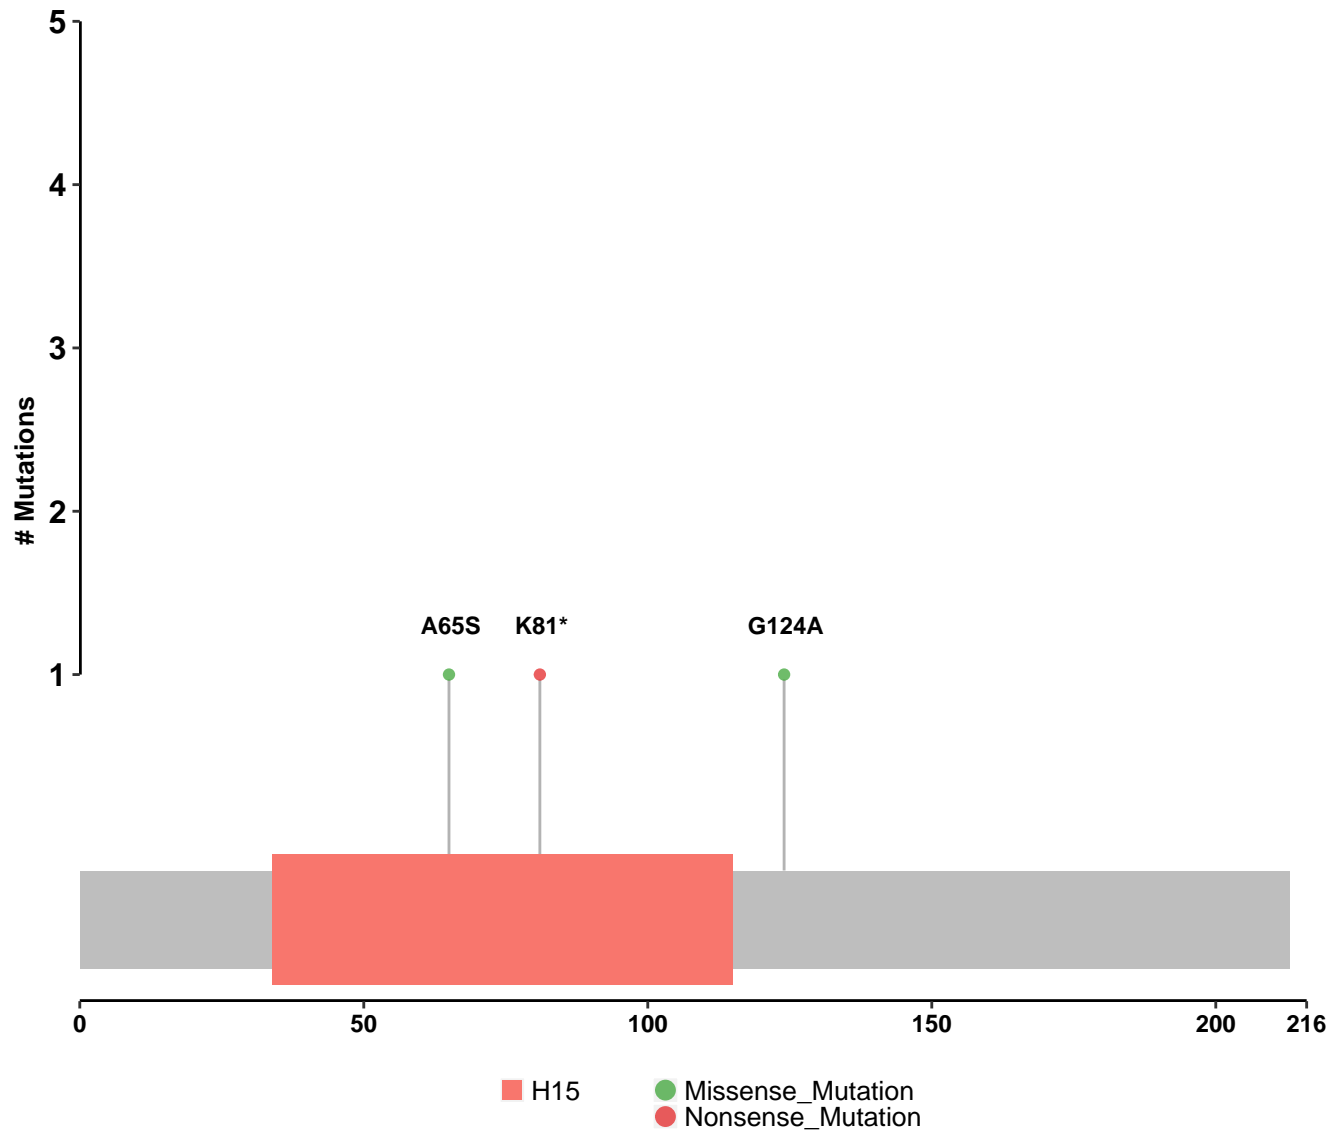

# HIST1H1D: [Somatic Mutation Rate: 6.06%]

NM\_005320

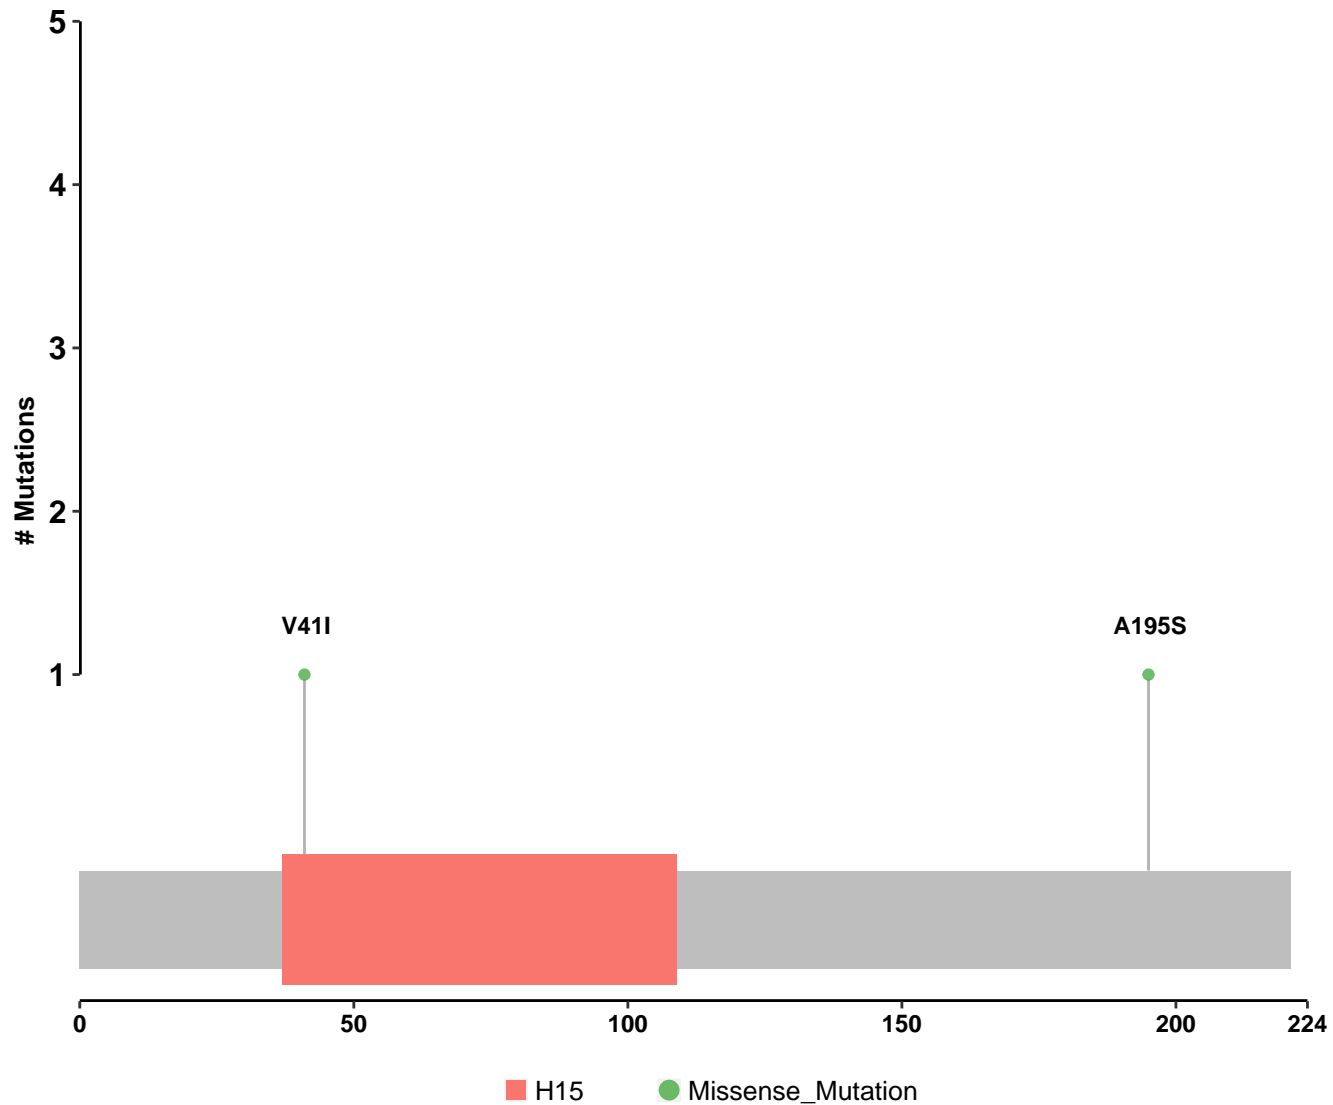

# IFIH1: [Somatic Mutation Rate: 9.09%]

NM\_022168

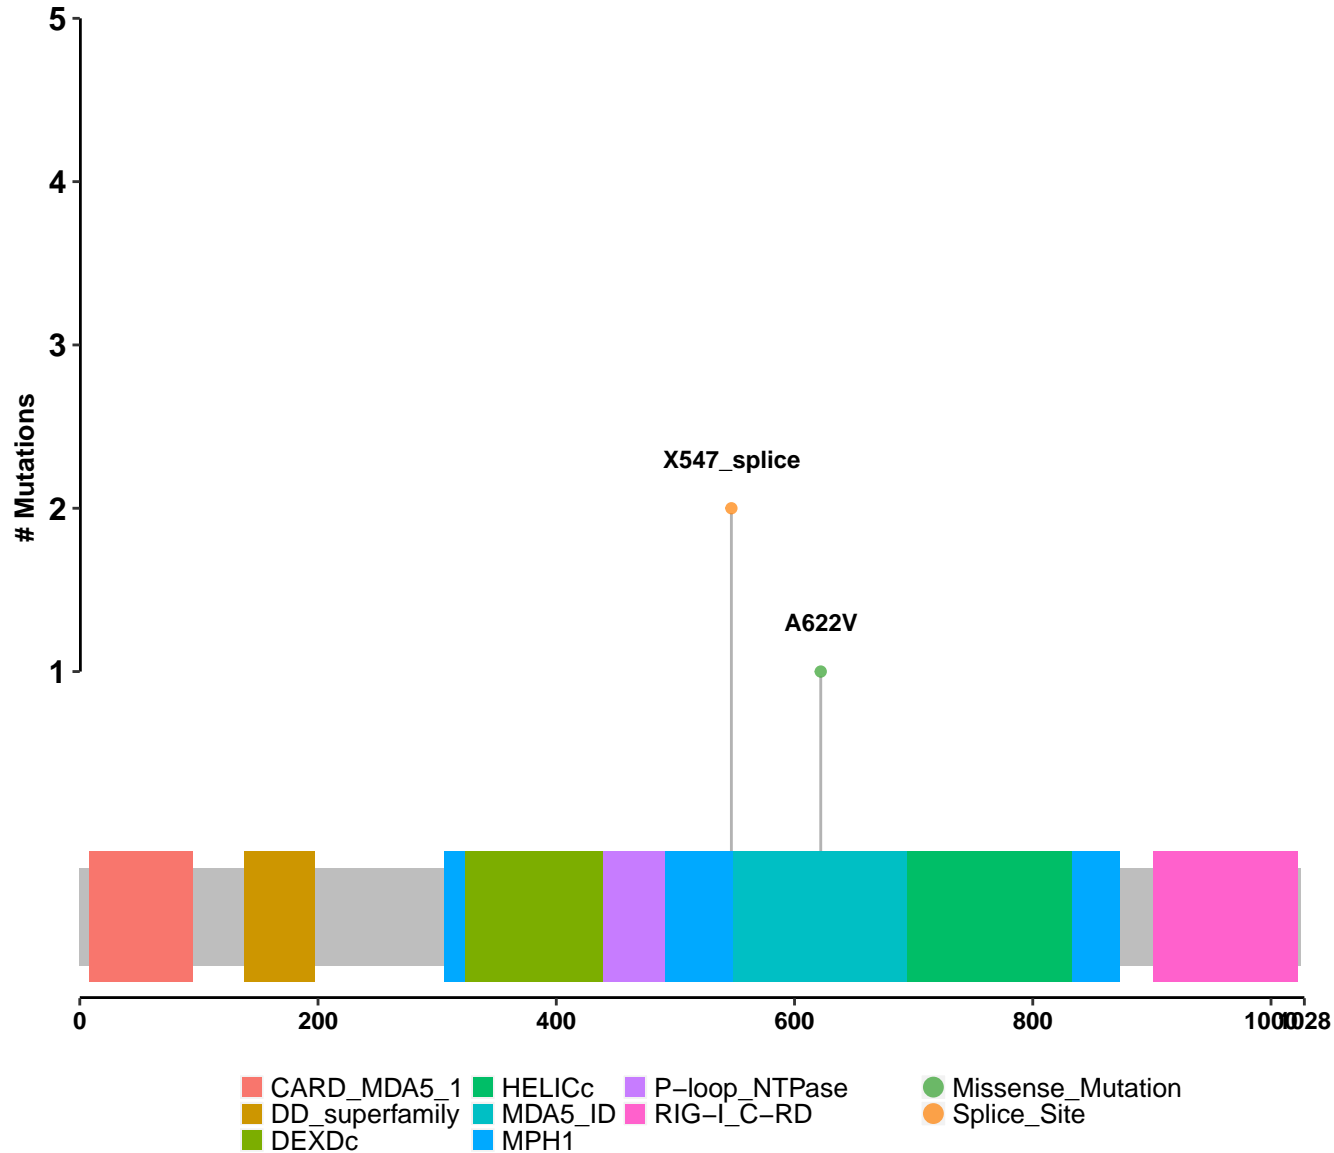

# KDM5A: [Somatic Mutation Rate: 6.06%]

NM\_001042603

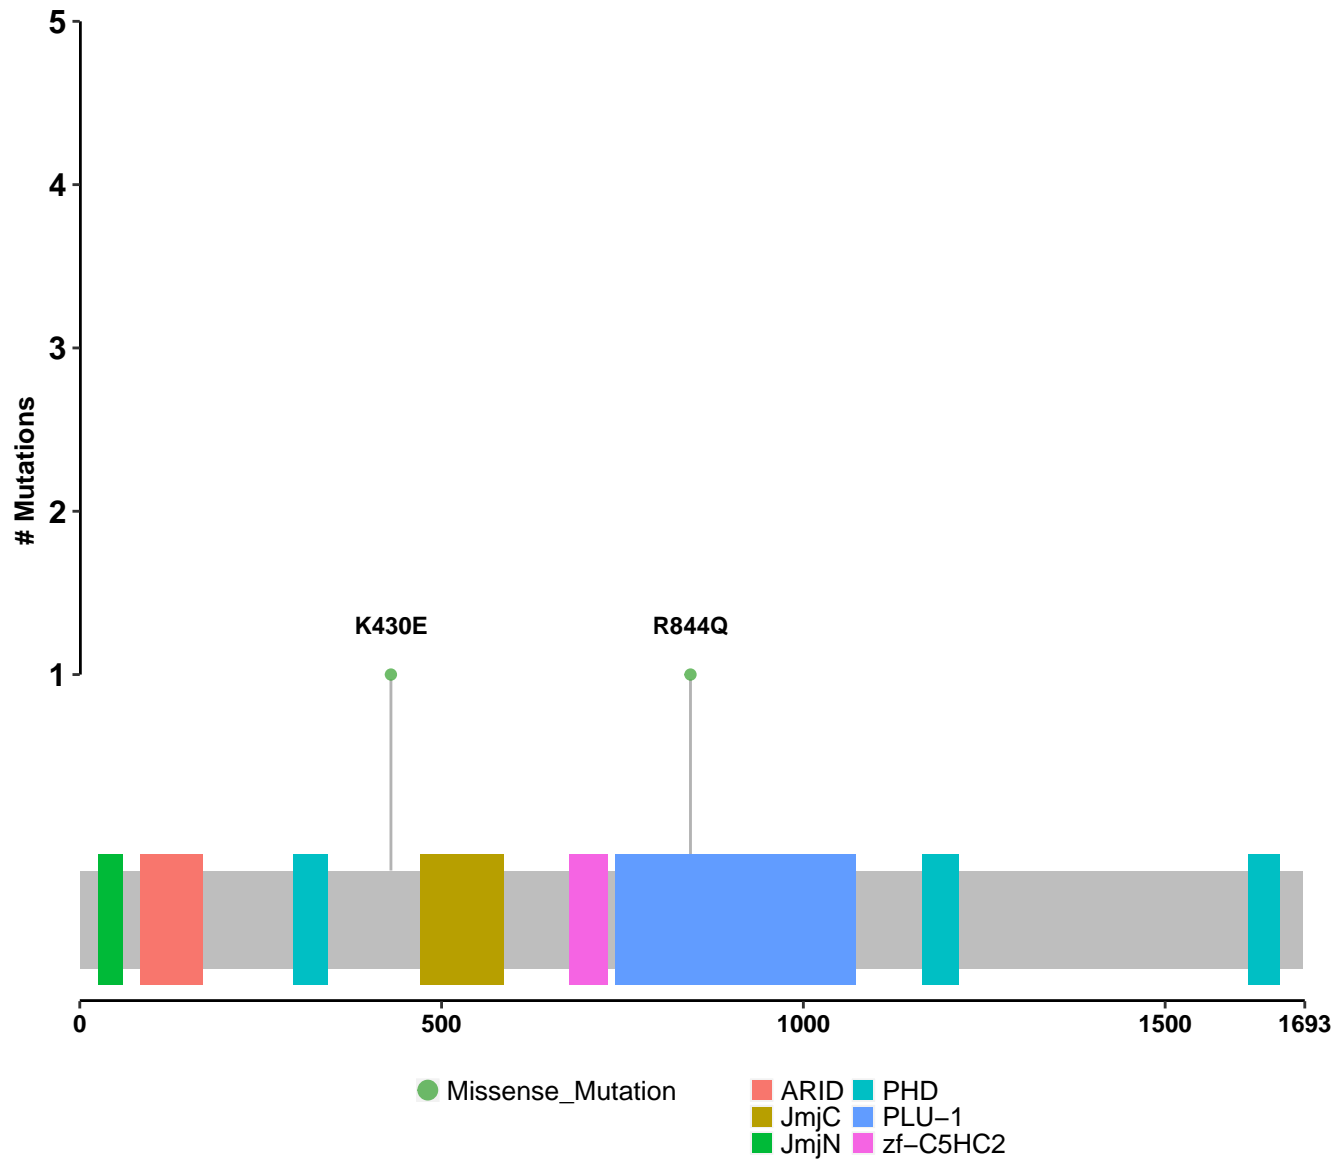

# NLRX1: [Somatic Mutation Rate: 9.09%]

NM\_024618

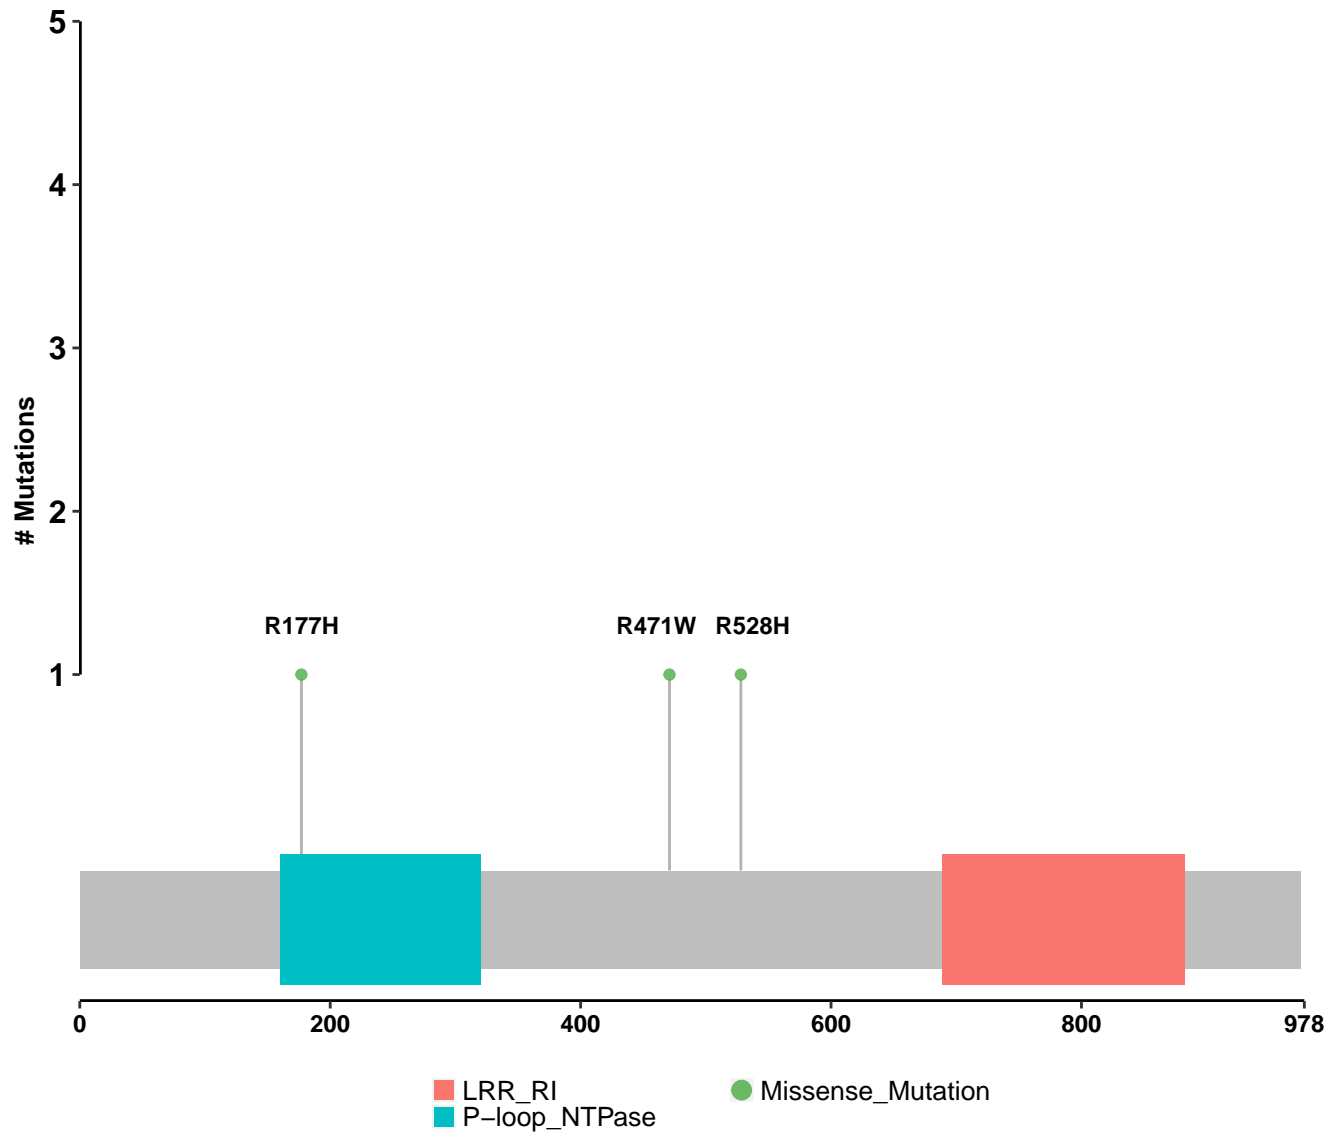

# TYK2: [Somatic Mutation Rate: 9.09%]

NM\_003331

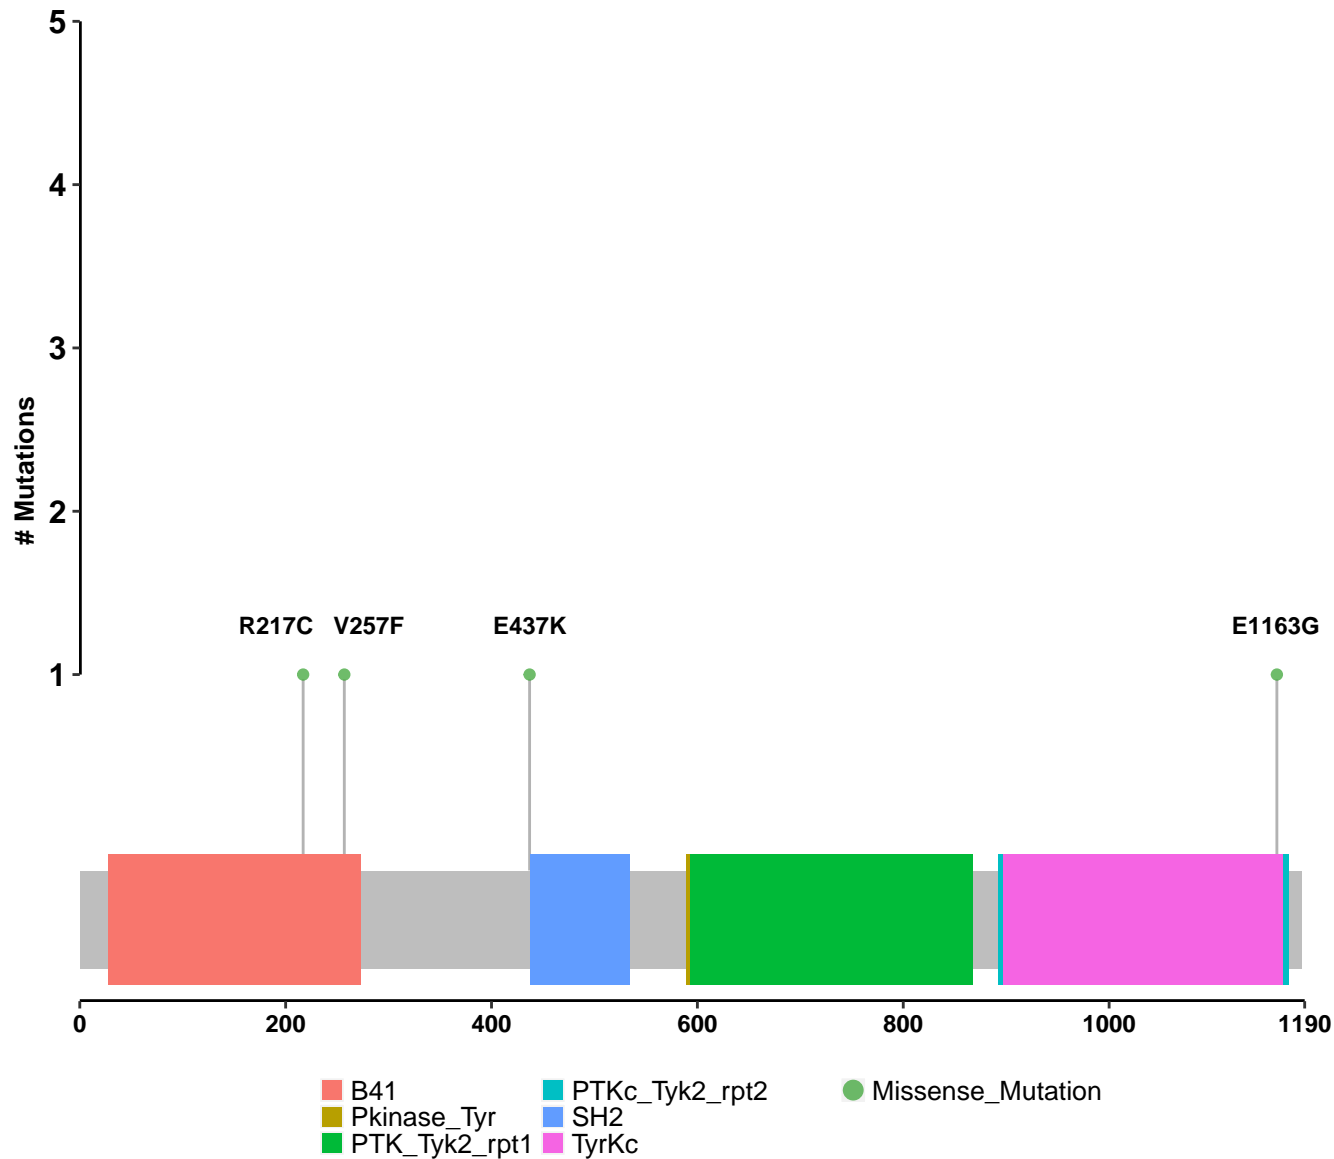

# WHSC1: [Somatic Mutation Rate: 6.06%]

NM\_001042424

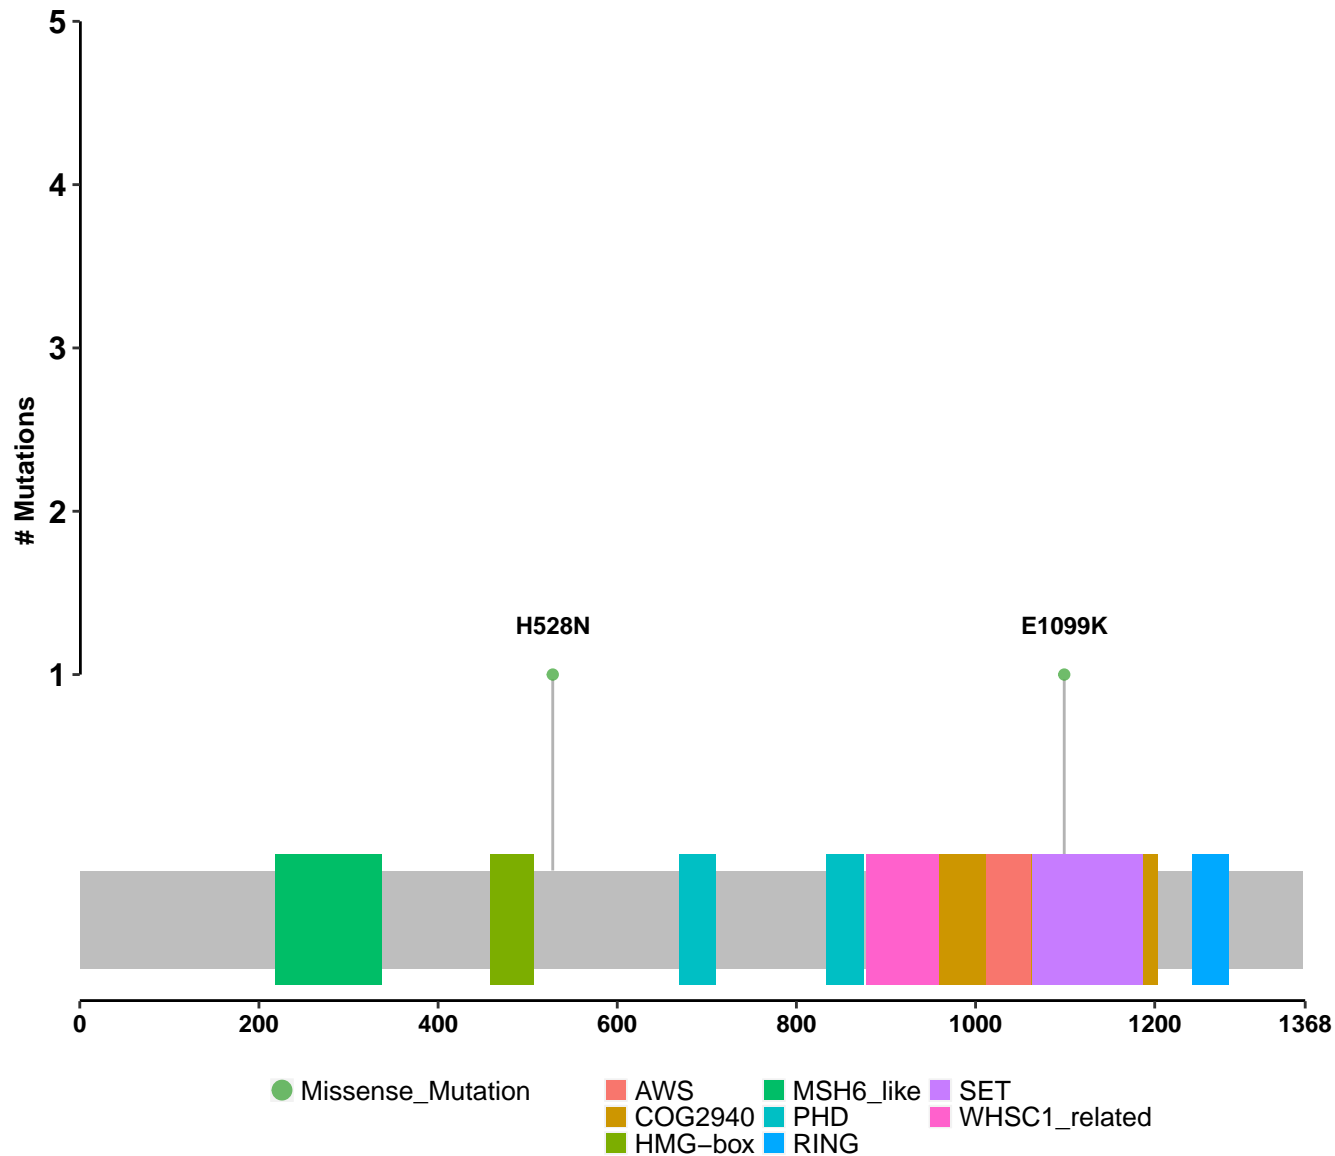



# BRD4: [Somatic Mutation Rate: 6.06%]

NM\_058243

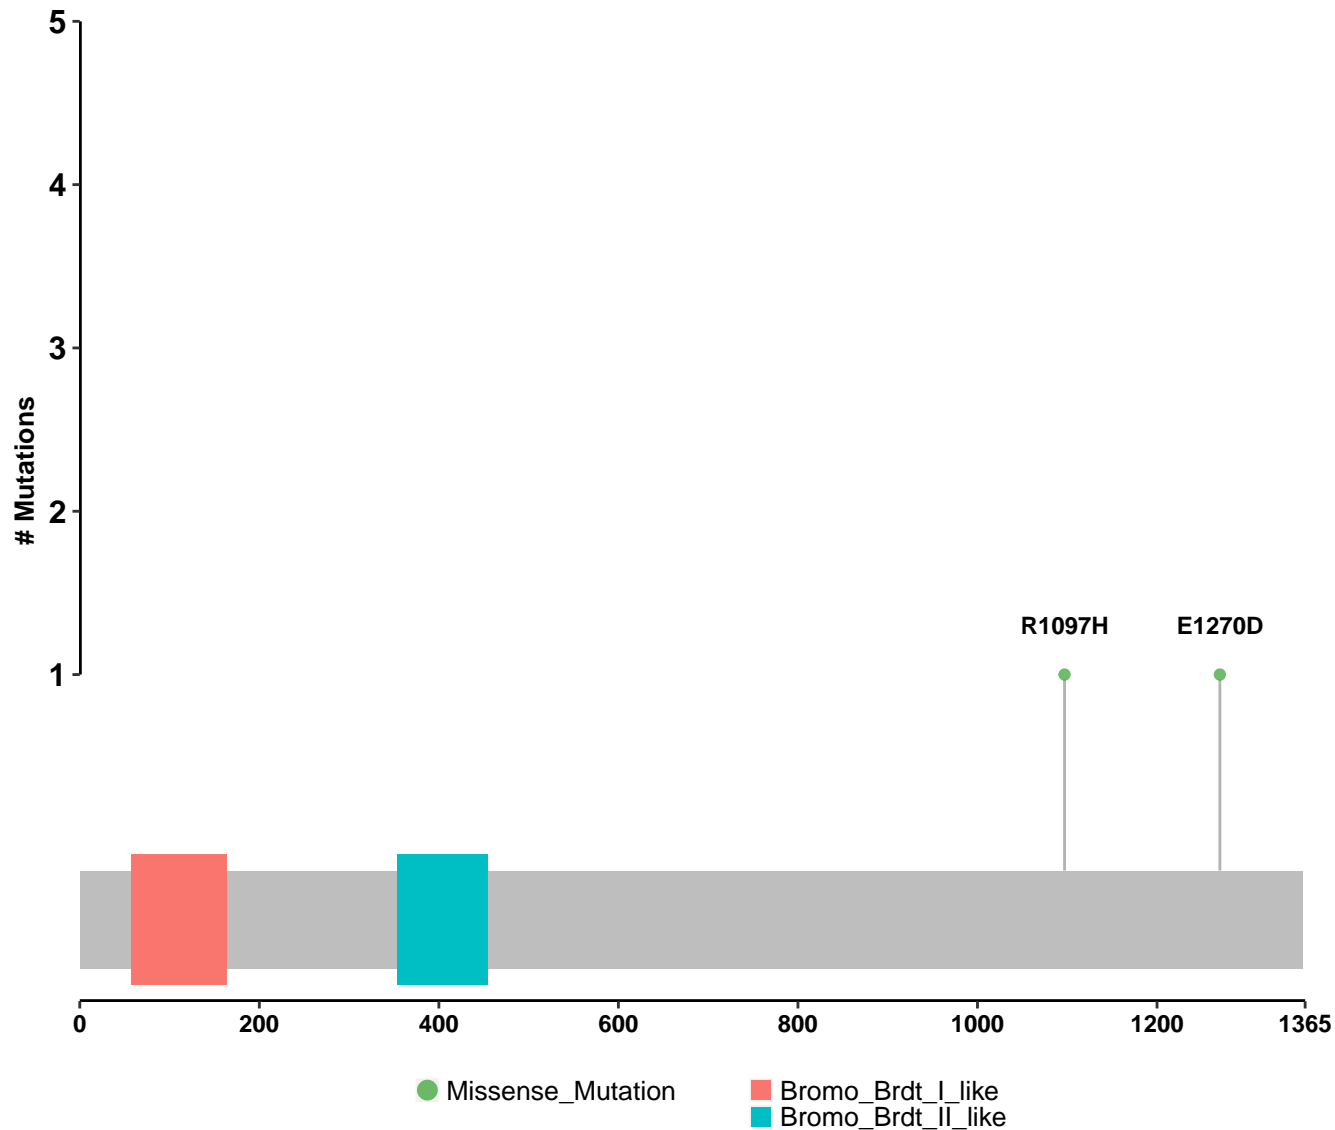

Supplement: MOESM3 [file 16340652]
